# Supplementary material for: The difference in expression of long noncoding RNAs in rat semen induced by high-fat diet was associated with metabolic pathways
Source: PeerJ. 2017 Jul 25;5:e3518. doi: 10.7717/peerj.3518 (PMC5530988; doi:10.7717/peerj.3518)
Supplement: Data S2 [file peerj-05-3518-s002.xlsx]

## Sheet: DIO_VS_Normol_Up_457
ProbeName	Gaozhi_NS	Gaozhi_flags	ZhengC_NS	ZhengC_flags	foldchange	foldchange(abs)	Regulation	ControlType	ProbeName.1	ControlType.1	Classify	Gene_symbol	Description	Seq_id	Target_id	Target_id_1	Target_chr	Target_strand	Target_start	Target_end_x000D_
CUST_6253_PI428311958	7.30994	P	2.43689	A	29.3044	29.3044	up	0	CUST_6253_PI428311958	0	lncRNA	NA	rn4_all_mrna_U08214 range=chr8:47577857-47578735 5'pad=0 3'pad=0 strand=- repeatMasking=none	seq6316	U08214	NA	chr8	-	47577857	47578735_x000D_
CUST_8359_PI428311958	7.19755	P	2.63841	A	23.5742	23.5742	up	0	CUST_8359_PI428311958	0	lncRNA	NA	rn4_all_mrna_FQ219070 range=chr16:49250646-49254430 5'pad=0 3'pad=0 strand=+ repeatMasking=none	seq8450	FQ219070	NA	chr16	+	49250646	49254430_x000D_
CUST_8135_PI428311958	7.29426	P	2.85647	A	21.6726	21.6726	up	0	CUST_8135_PI428311958	0	lncRNA	NA	rn4_all_mrna_AF196189 range=chr15:32126242-32191186 5'pad=0 3'pad=0 strand=+ repeatMasking=none	seq8221	AF196189	NA	chr15	+	32126242	32191186_x000D_
CUST_787_PI428311958	6.76849	P	2.55297	A	18.578	18.578	up	0	CUST_787_PI428311958	0	lncRNA	NA	"chr10|mm9_knownGene_uc007jfx.2| strand:+ 46684401-46684579,46684626-46684648,46684649-46684653,46684654-46684696,46684697-46685118,46691792-46691851,46699299-46699406,46703145-46703246,46705141-46705274,46714537-46714612,46716926-46716943,46716945-46716991,46717004-46717013,46717016-46717021,46717026-46717038,46717042-46717047,46717052-46717082,46717083-46717123,46717140-46717284,"	seq790	uc007jfx.2	NA	chr10	+	46684401	46717284_x000D_
CUST_5947_PI428311958	6.49875	P	2.43786	A	16.6898	16.6898	up	0	CUST_5947_PI428311958	0	lncRNA	NA	rn4_all_mrna_AB002393 range=chr7:30520537-30521150 5'pad=0 3'pad=0 strand=+ repeatMasking=none	seq6002	AB002393	NA	chr7	+	30520537	30521150_x000D_
CUST_446_PI428311958	6.48865	P	2.4812	A	16.0828	16.0828	up	0	CUST_446_PI428311958	0	lncRNA	NA	"chr1|mm9_knownGene_uc008gqn.2| strand:+ 213124641-213124704,213124705-213124711,213124718-213124768,213124771-213124993,213127437-213127530,213127613-213127702,213128360-213128488,213131652-213131768,213134338-213134454,213135200-213135213,213135219-213135225,213135231-213135323,213136657-213136930,213136940-213137074,213137154-213137251,213138684-213138766,213140770-213140857,213142948-21314303…	seq448	uc008gqn.2	NA	chr1	+	213124641	213160124_x000D_
CUST_5041_PI428311958	6.40575	P	2.57186	A	14.2599	14.2599	up	0	CUST_5041_PI428311958	0	lncRNA	NA	rn4_all_mrna_FQ225372 range=chr4:135750260-135751060 5'pad=0 3'pad=0 strand=+ repeatMasking=none	seq5075	FQ225372	NA	chr4	+	135750260	135751060_x000D_
CUST_305_PI428311958	6.34225	P	2.62674	A	13.1364	13.1364	up	0	CUST_305_PI428311958	0	lncRNA	NA	"chr6|gi|356460944|ref|NR_045488.1|| strand:- 33065924-33065955,33065886-33065918,33065689-33065756,33065602-33065677,33065587-33065601,33060168-33060223,33060147-33060158,33059890-33060045,"	seq306	NR_045488.1	NA	chr6	-	33059890	33065956_x000D_
CUST_6233_PI428311958	6.19205	P	2.51708	A	12.7725	12.7725	up	0	CUST_6233_PI428311958	0	lncRNA	NA	rn4_all_mrna_JF412808 range=chr8:35487176-35489406 5'pad=0 3'pad=0 strand=- repeatMasking=none	seq6295	JF412808	NA	chr8	-	35487176	35489406_x000D_
CUST_7638_PI428311958	6.35925	P	2.72254	A	12.4382	12.4382	up	0	CUST_7638_PI428311958	0	lncRNA	NA	rn4_all_mrna_AF233692 range=chr13:46266973-46268913 5'pad=0 3'pad=0 strand=+ repeatMasking=none	seq7716	AF233692	NA	chr13	+	46266973	46268913_x000D_
CUST_279_PI428311958	6.138	P	2.55924	A	11.9485	11.9485	up	0	CUST_279_PI428311958	0	lncRNA	NA	"chrX|gi|354725889|ref|NR_045448.1|| strand:- 26074268-26074487,26074232-26074260,26074182-26074230,26073938-26074099,26073058-26073937,26073049-26073054,26073013-26073039,26072992-26073012,26072976-26072991,26072941-26072974,26072816-26072939,26072733-26072814,26072716-26072732,26072633-26072714,26072613-26072626,26072564-26072611,26072495-26072562,26072383-26072490,26072348-26072359,26072307-26…	seq280	NR_045448.1	NA	chrX	-	26071892	26074488_x000D_
CUST_3553_PI428311958	5.97052	P	2.4455	A	11.5117	11.5117	up	0	CUST_3553_PI428311958	0	lncRNA	NA	rn4_all_mrna_AF136401 range=chr1:159563633-159576982 5'pad=0 3'pad=0 strand=+ repeatMasking=none	seq3568	AF136401	NA	chr1	+	159563633	159576982_x000D_
CUST_3255_PI428311958	6.08946	P	2.72007	A	10.3345	10.3345	up	0	CUST_3255_PI428311958	0	lncRNA	NA	rn4_all_mrna_FQ222518 range=chr1:208138143-208155938 5'pad=0 3'pad=0 strand=- repeatMasking=none	seq3267	FQ222518	NA	chr1	-	208138143	208155938_x000D_
CUST_7370_PI428311958	5.90767	P	2.55162	A	10.2393	10.2393	up	0	CUST_7370_PI428311958	0	lncRNA	NA	rn4_all_mrna_FQ229167 range=chr11:11721363-11721827 5'pad=0 3'pad=0 strand=+ repeatMasking=none	seq7446	FQ229167	NA	chr11	+	11721363	11721827_x000D_
CUST_2918_PI428311958	5.82854	P	2.47389	A	10.2295	10.2295	up	0	CUST_2918_PI428311958	0	lncRNA	NA	uc.180+	seq2927	uc.180+	NA	chr10	-	18193448	18193672_x000D_
CUST_677_PI428311958	5.84211	P	2.49591	A	10.1697	10.1697	up	0	CUST_677_PI428311958	0	lncRNA	NA	"chr7|gi|377833432|ref|XR_141780.1|| strand:- 123361509-123361687,123338667-123338835,123338662-123338666,123338513-123338661,"	seq680	XR_141780.1	NA	chr7	-	123338513	123361687_x000D_
CUST_4955_PI428311958	5.75478	P	2.4642	A	9.78508	9.78508	up	0	CUST_4955_PI428311958	0	lncRNA	NA	rn4_all_mrna_FQ225209 range=chr4:99961903-99962395 5'pad=0 3'pad=0 strand=- repeatMasking=none	seq4989	FQ225209	NA	chr4	-	99961903	99962395_x000D_
CUST_3277_PI428311958	6.25913	P	2.9981	A	9.58666	9.58666	up	0	CUST_3277_PI428311958	0	lncRNA	NA	rn4_all_mrna_FQ226002 range=chr1:12959471-12960829 5'pad=0 3'pad=0 strand=- repeatMasking=none	seq3289	FQ226002	NA	chr1	-	12959471	12960829_x000D_
CUST_9260_PI428311958	6.00243	P	2.77906	A	9.33965	9.33965	up	0	CUST_9260_PI428311958	0	lncRNA	NA	"gi|293343152|ref|XR_085676.1| PREDICTED: Rattus norvegicus hypothetical protein LOC681251 (LOC681251), partial miscRNA"	seq9361	XR_085676.1	NA	NA	NA	NA	NA_x000D_
CUST_856_PI428311958	6.89388	P	3.70872	A	9.09554	9.09554	up	0	CUST_856_PI428311958	0	lncRNA	NA	"chr15|mm9_knownGene_uc007tre.1| strand:- 29774915-29774968,29774910-29774914,29774810-29774908,29774559-29774659,29774373-29774550,29774361-29774367,"	seq859	uc007tre.1	NA	chr15	-	29774361	29774968_x000D_
CUST_2772_PI428311958	6.62781	P	3.4455	A	9.07762	9.07762	up	0	CUST_2772_PI428311958	0	lncRNA	NA	uc.27+	seq2781	uc.27+	NA	chr5	+	119933072	119933360_x000D_
CUST_8089_PI428311958	6.00941	P	2.89601	A	8.65419	8.65419	up	0	CUST_8089_PI428311958	0	lncRNA	NA	rn4_all_mrna_FQ232917 range=chr15:16839122-16840035 5'pad=0 3'pad=0 strand=+ repeatMasking=none	seq8175	FQ232917	NA	chr15	+	16839122	16840035_x000D_
CUST_9496_PI428311958	5.695	P	2.58384	A	8.64078	8.64078	up	0	CUST_9496_PI428311958	0	lncRNA	NA	"gi|293361133|ref|XR_086317.1| PREDICTED: Rattus norvegicus Dmx-like 2 (Dmxl2), miscRNA"	seq9597	XR_086317.1	NA	NA	NA	NA	NA_x000D_
CUST_2199_PI428311958	5.68997	P	2.58133	A	8.62567	8.62567	up	0	CUST_2199_PI428311958	0	lncRNA	NA	"chr3|ri|2010008I17|ZX00043L10|974| strand:- 124993247-124993354,124987059-124987063,124986452-124986671,124981977-124982232,124981934-124981975,124981590-124981931,"	seq2205	ZX00043L10	NA	chr3	-	124981592	124993352_x000D_
CUST_6952_PI428311958	5.73665	P	2.62988	A	8.61454	8.61454	up	0	CUST_6952_PI428311958	0	lncRNA	NA	rn4_all_mrna_AF277900 range=chr10:11910402-11926711 5'pad=0 3'pad=0 strand=+ repeatMasking=none	seq7024	AF277900	NA	chr10	+	11910402	11926711_x000D_
CUST_9208_PI428311958	5.74509	P	2.65011	A	8.54439	8.54439	up	0	CUST_9208_PI428311958	0	lncRNA	NA	"gi|293340886|ref|XR_085578.1| PREDICTED: Rattus norvegicus similar to hypothetical protein MGC19444 (RGD1311861), miscRNA"	seq9309	XR_085578.1	NA	NA	NA	NA	NA_x000D_
CUST_2117_PI428311958	10.9059	P	7.88507	P	8.11633	8.11633	up	0	CUST_2117_PI428311958	0	lncRNA	NA	"chr3|mm9_knownGene_uc008nvu.1| strand:- 155775197-155775226,155775179-155775182,155775132-155775177,155775112-155775129,155752410-155752414,155751224-155751350,155748811-155748990,155748038-155748086,155747975-155748027,155747950-155747970,155747823-155747943,"	seq2123	uc008nvu.1	NA	chr3	-	155747824	155775232_x000D_
CUST_1197_PI428311958	5.58126	P	2.57706	A	8.02331	8.02331	up	0	CUST_1197_PI428311958	0	lncRNA	NA	"chr4|mm9_knownGene_uc009cxs.1| strand:- 124961820-124962095,124961770-124961819,124961742-124961756,124961631-124961736,124961513-124961618,124961367-124961501,124961254-124961362,124961154-124961234,124961115-124961145,124961108-124961114,124960970-124961107,124960876-124960963,124960718-124960875,124960568-124960665,"	seq1200	uc009cxs.1	NA	chr4	-	124960568	124962096_x000D_
CUST_3684_PI428311958	6.50921	P	3.51514	A	7.96718	7.96718	up	0	CUST_3684_PI428311958	0	lncRNA	NA	rn4_all_mrna_FQ209756 range=chr1:208705277-208708982 5'pad=0 3'pad=0 strand=- repeatMasking=none	seq3701	FQ209756	NA	chr1	-	208705277	208708982_x000D_
CUST_384_PI428311958	5.59435	P	2.60497	A	7.94129	7.94129	up	0	CUST_384_PI428311958	0	lncRNA	NA	"chr7|ri|D930029A21|PX00202I19|1805| strand:+ 127668691-127668947,127668949-127668989,127669000-127669198,127669218-127669321,127669343-127669358,127669360-127669713,127669714-127669729,127669736-127669899,127669904-127669993,127670006-127670034,127670035-127670182,127670183-127670368,127670370-127670383,127670385-127670389,"	seq386	PX00202I19	NA	chr7	+	127668691	127670389_x000D_
CUST_8516_PI428311958	5.50679	P	2.54269	A	7.80337	7.80337	up	0	CUST_8516_PI428311958	0	lncRNA	NA	rn4_all_mrna_AY325171 range=chr17:28809248-28835022 5'pad=0 3'pad=0 strand=+ repeatMasking=none	seq8607	AY325171	NA	chr17	+	28809248	28835022_x000D_
CUST_7285_PI428311958	5.7228	P	2.76725	A	7.75726	7.75726	up	0	CUST_7285_PI428311958	0	lncRNA	NA	rn4_all_mrna_AF039203 range=chr10:93354227-93355245 5'pad=0 3'pad=0 strand=+ repeatMasking=none	seq7360	AF039203	NA	chr10	+	93354227	93355245_x000D_
CUST_9501_PI428311958	5.41154	P	2.48138	A	7.62198	7.62198	up	0	CUST_9501_PI428311958	0	lncRNA	NA	"gi|293361469|ref|XR_006589.2| PREDICTED: Rattus norvegicus similar to testis expressed gene 15 (LOC689179), miscRNA"	seq9602	XR_006589.2	NA	NA	NA	NA	NA_x000D_
CUST_5872_PI428311958	5.53211	P	2.61805	A	7.53735	7.53735	up	0	CUST_5872_PI428311958	0	lncRNA	NA	rn4_all_mrna_FQ235082 range=chr7:465353-466167 5'pad=0 3'pad=0 strand=+ repeatMasking=none	seq5926	FQ235082	NA	chr7	+	465353	466167_x000D_
CUST_6596_PI428311958	5.77197	P	2.87129	A	7.46779	7.46779	up	0	CUST_6596_PI428311958	0	lncRNA	NA	rn4_all_mrna_FQ228048 range=chr9:52119657-52120825 5'pad=0 3'pad=0 strand=- repeatMasking=none	seq6662	FQ228048	NA	chr9	-	52119657	52120825_x000D_
CUST_545_PI428311958	5.57296	P	2.70292	A	7.31082	7.31082	up	0	CUST_545_PI428311958	0	lncRNA	NA	"chr1|gi|377833607|ref|XR_141875.1|| strand:+ 209009887-209009944,209009945-209009983,209010403-209010735,"	seq547	XR_141875.1	NA	chr1	+	209009887	209010735_x000D_
CUST_4267_PI428311958	6.40467	P	3.57301	A	7.11893	7.11893	up	0	CUST_4267_PI428311958	0	lncRNA	NA	rn4_all_mrna_FQ229861 range=chr2:228790061-228791264 5'pad=0 3'pad=0 strand=+ repeatMasking=none	seq4292	FQ229861	NA	chr2	+	228790061	228791264_x000D_
CUST_4145_PI428311958	5.30068	P	2.51788	A	6.88183	6.88183	up	0	CUST_4145_PI428311958	0	lncRNA	NA	rn4_all_mrna_AY045577 range=chr2:181498863-181499505 5'pad=0 3'pad=0 strand=- repeatMasking=none	seq4168	AY045577	NA	chr2	-	181498863	181499505_x000D_
CUST_6546_PI428311958	5.49362	P	2.71262	A	6.87329	6.87329	up	0	CUST_6546_PI428311958	0	lncRNA	NA	rn4_all_mrna_FQ227735 range=chr9:11785532-11786535 5'pad=0 3'pad=0 strand=- repeatMasking=none	seq6610	FQ227735	NA	chr9	-	11785532	11786535_x000D_
CUST_8075_PI428311958	6.02737	P	3.26247	A	6.797	6.797	up	0	CUST_8075_PI428311958	0	lncRNA	NA	rn4_all_mrna_FQ231719 range=chr15:3483146-3484006 5'pad=0 3'pad=0 strand=+ repeatMasking=none	seq8160	FQ231719	NA	chr15	+	3483146	3484006_x000D_
CUST_9642_PI428311958	6.36297	P	3.60811	A	6.74988	6.74988	up	0	CUST_9642_PI428311958	0	lncRNA	NA	"gi|295851904|ref|XR_085851.2| PREDICTED: Rattus norvegicus WW domain-containing adapter with a coiled-coil region-like (LOC498824), miscRNA"	seq9743	XR_085851.2	NA	NA	NA	NA	NA_x000D_
CUST_7733_PI428311958	5.44126	P	2.70866	A	6.64655	6.64655	up	0	CUST_7733_PI428311958	0	lncRNA	NA	rn4_all_mrna_FQ225111 range=chr13:71063832-71065390 5'pad=0 3'pad=0 strand=- repeatMasking=none	seq7811	FQ225111	NA	chr13	-	71063832	71065390_x000D_
CUST_6234_PI428311958	7.54351	P	4.81684	A	6.61924	6.61924	up	0	CUST_6234_PI428311958	0	lncRNA	NA	rn4_all_mrna_HQ687476 range=chr8:35443308-35444593 5'pad=0 3'pad=0 strand=+ repeatMasking=none	seq6296	HQ687476	NA	chr8	+	35443308	35444593_x000D_
CUST_896_PI428311958	5.96083	P	3.24018	A	6.59168	6.59168	up	0	CUST_896_PI428311958	0	lncRNA	NA	"chr4|mm9_knownGene_uc009eoy.1| strand:- 179829717-179829824,179824216-179824357,179822743-179822873,179817484-179817586,179813892-179814043,179808091-179808189,179806813-179807034,179804176-179804334,179802457-179802652,179798791-179798956,179797343-179797441,179797269-179797341,179793505-179793569,179792258-179792375,179790682-179790943,179790505-179790554,179790477-179790502,179790436-17979044…	seq899	uc009eoy.1	NA	chr4	-	179790208	179829824_x000D_
CUST_8437_PI428311958	5.68628	P	2.97098	A	6.56732	6.56732	up	0	CUST_8437_PI428311958	0	lncRNA	NA	rn4_all_mrna_AF220608 range=chr17:53033067-53131770 5'pad=0 3'pad=0 strand=- repeatMasking=none	seq8528	AF220608	NA	chr17	-	53033067	53131770_x000D_
CUST_2900_PI428311958	6.45808	P	3.74958	A	6.53642	6.53642	up	0	CUST_2900_PI428311958	0	lncRNA	NA	uc.161+	seq2909	uc.161+	NA	chr2	-	24821036	24821312_x000D_
CUST_6167_PI428311958	7.14971	P	4.44328	A	6.52702	6.52702	up	0	CUST_6167_PI428311958	0	lncRNA	NA	rn4_all_mrna_M88709 range=chr8:27411456-28509633 5'pad=0 3'pad=0 strand=+ repeatMasking=none	seq6226	M88709	NA	chr8	+	27411456	28509633_x000D_
CUST_4331_PI428311958	5.80248	P	3.12166	A	6.41223	6.41223	up	0	CUST_4331_PI428311958	0	lncRNA	NA	rn4_all_mrna_AY429599 range=chr3:59504573-59558097 5'pad=0 3'pad=0 strand=- repeatMasking=none	seq4356	AY429599	NA	chr3	-	59504573	59558097_x000D_
CUST_332_PI428311958	5.35559	P	2.67619	A	6.40587	6.40587	up	0	CUST_332_PI428311958	0	lncRNA	NA	"chr14|mm9_knownGene_uc012dvl.1| strand:- 79121860-79122305,79098781-79098869,79095271-79095454,79093282-79093446,79090565-79090626,79088818-79088898,79088104-79088172,79087243-79087321,79081796-79081902,79080182-79080186,79079347-79079514,79077157-79077307,79076961-79077151,79076830-79076958,79076808-79076829,79076760-79076807,79076745-79076759,79076675-79076742,79076561-79076660,79076485-790765…	seq334	uc012dvl.1	NA	chr14	-	79076300	79122305_x000D_
CUST_1550_PI428311958	5.79169	P	3.11314	A	6.40211	6.40211	up	0	CUST_1550_PI428311958	0	lncRNA	NA	"chr17|mm9_knownGene_uc007qbj.1| strand:+ 36613706-36613729,36613730-36613798,36613800-36614205,36629701-36629786,36630540-36630659,36631523-36631676,36638858-36638969,36641209-36641405,36641430-36641473,36641477-36641505,36641511-36641533,36641565-36641583,36641594-36641656,36641663-36641733,36641743-36641756,36641761-36641768,36641770-36642066,36642071-36642230,36642231-36642251,"	seq1556	uc007qbj.1	NA	chr17	+	36613704	36642252_x000D_
CUST_3632_PI428311958	5.2783	P	2.60655	A	6.37199	6.37199	up	0	CUST_3632_PI428311958	0	lncRNA	NA	rn4_all_mrna_AY539919 range=chr1:191553360-191557682 5'pad=0 3'pad=0 strand=+ repeatMasking=none	seq3648	AY539919	NA	chr1	+	191553360	191557682_x000D_
CUST_4973_PI428311958	6.14354	P	3.48121	A	6.33056	6.33056	up	0	CUST_4973_PI428311958	0	lncRNA	NA	rn4_all_mrna_FQ231069 range=chr4:104604027-104610412 5'pad=0 3'pad=0 strand=- repeatMasking=none	seq5007	FQ231069	NA	chr4	-	104604027	104610412_x000D_
CUST_3456_PI428311958	5.45021	P	2.79739	A	6.28893	6.28893	up	0	CUST_3456_PI428311958	0	lncRNA	NA	rn4_all_mrna_FQ225199 range=chr1:95925158-95926251 5'pad=0 3'pad=0 strand=+ repeatMasking=none	seq3469	FQ225199	NA	chr1	+	95925158	95926251_x000D_
CUST_7277_PI428311958	5.54713	P	2.9069	A	6.23431	6.23431	up	0	CUST_7277_PI428311958	0	lncRNA	NA	rn4_all_mrna_FQ233402 range=chr10:92038218-92038653 5'pad=0 3'pad=0 strand=- repeatMasking=none	seq7352	FQ233402	NA	chr10	-	92038218	92038653_x000D_
CUST_9613_PI428311958	9.44423	P	6.82837	P	6.12986	6.12986	up	0	CUST_9613_PI428311958	0	lncRNA	NA	"gi|295851815|ref|XR_009220.3| PREDICTED: Rattus norvegicus similar to Alcohol dehydrogenase 1A (Alcohol dehydrogenase alpha subunit) (LOC310902), miscRNA"	seq9714	XR_009220.3	NA	NA	NA	NA	NA_x000D_
CUST_8256_PI428311958	5.98093	P	3.38441	A	6.04827	6.04827	up	0	CUST_8256_PI428311958	0	lncRNA	NA	rn4_all_mrna_AF194997 range=chr16:63053797-64110215 5'pad=0 3'pad=0 strand=+ repeatMasking=none	seq8345	AF194997	NA	chr16	+	63053797	64110215_x000D_
CUST_5105_PI428311958	9.55489	P	7.00233	P	5.86674	5.86674	up	0	CUST_5105_PI428311958	0	lncRNA	NA	rn4_all_mrna_FQ225056 range=chr4:163523448-163524158 5'pad=0 3'pad=0 strand=- repeatMasking=none	seq5142	FQ225056	NA	chr4	-	163523448	163524158_x000D_
CUST_8886_PI428311958	5.9319	P	3.41994	A	5.70392	5.70392	up	0	CUST_8886_PI428311958	0	lncRNA	NA	rn4_all_mrna_FQ225492 range=chr19:36097982-36099225 5'pad=0 3'pad=0 strand=+ repeatMasking=none	seq8982	FQ225492	NA	chr19	+	36097982	36099225_x000D_
CUST_6867_PI428311958	6.45442	P	3.94565	A	5.69134	5.69134	up	0	CUST_6867_PI428311958	0	lncRNA	NA	rn4_all_mrna_M63991 range=chrX:126739203-126743231 5'pad=0 3'pad=0 strand=- repeatMasking=none	seq6937	M63991	NA	chrX	-	126739203	126743231_x000D_
CUST_3030_PI428311958	5.8225	P	3.35209	A	5.542	5.542	up	0	CUST_3030_PI428311958	0	lncRNA	NA	uc.297+	seq3039	uc.297+	NA	chr1	+	249720304	249720672_x000D_
CUST_977_PI428311958	6.17784	P	3.71683	A	5.50602	5.50602	up	0	CUST_977_PI428311958	0	lncRNA	NA	"chr5|gi|377833948|ref|XR_142085.1|| strand:- 128291320-128291399,128291254-128291318,128291233-128291250,128291175-128291232,128291123-128291174,128290951-128291121,128290937-128290940,128290807-128290935,"	seq980	XR_142085.1	NA	chr5	-	128290807	128291399_x000D_
CUST_3683_PI428311958	5.70874	P	3.26492	A	5.4408	5.4408	up	0	CUST_3683_PI428311958	0	lncRNA	NA	rn4_all_mrna_FQ232802 range=chr1:208650614-208651682 5'pad=0 3'pad=0 strand=+ repeatMasking=none	seq3700	FQ232802	NA	chr1	+	208650614	208651682_x000D_
CUST_7644_PI428311958	5.7731	P	3.33531	A	5.4181	5.4181	up	0	CUST_7644_PI428311958	0	lncRNA	NA	rn4_all_mrna_AF209406 range=chr13:87552323-87574412 5'pad=0 3'pad=0 strand=+ repeatMasking=none	seq7722	AF209406	NA	chr13	+	87552323	87574412_x000D_
CUST_4640_PI428311958	11.0453	P	8.6209	P	5.36819	5.36819	up	0	CUST_4640_PI428311958	0	lncRNA	NA	rn4_all_mrna_AY621350 range=chr3:142904984-142905194 5'pad=0 3'pad=0 strand=+ repeatMasking=none	seq4668	AY621350	NA	chr3	+	142904984	142905194_x000D_
CUST_1113_PI428311958	5.55203	P	3.16645	A	5.22553	5.22553	up	0	CUST_1113_PI428311958	0	lncRNA	NA	"chr17|mm9_knownGene_uc011zab.1| strand:+ 14286574-14286832,14286834-14287010,14287169-14287274,14294370-14294456,14294458-14294619,14294647-14294709,14294710-14294853,14294855-14294859,14294861-14294963,14294966-14295045,14295058-14295110,14295182-14295201,14295234-14295264,14295276-14295284,14295299-14295309,14295311-14295315,14295318-14295339,14295340-14295349,14295351-14295354,14295355-142954…	seq1116	uc011zab.1	NA	chr17	+	14286574	14295500_x000D_
CUST_4925_PI428311958	5.67604	P	3.33981	A	5.0498	5.0498	up	0	CUST_4925_PI428311958	0	lncRNA	NA	rn4_all_mrna_AF409106 range=chr4:84135436-84148143 5'pad=0 3'pad=0 strand=+ repeatMasking=none	seq4959	AF409106	NA	chr4	+	84135436	84148143_x000D_
CUST_3702_PI428311958	6.92687	P	4.61697	A	4.95849	4.95849	up	0	CUST_3702_PI428311958	0	lncRNA	NA	rn4_all_mrna_BC061965 range=chr1:212297750-212300506 5'pad=0 3'pad=0 strand=+ repeatMasking=none	seq3719	BC061965	NA	chr1	+	212297750	212300506_x000D_
CUST_1233_PI428311958	6.50276	P	4.21107	A	4.89627	4.89627	up	0	CUST_1233_PI428311958	0	lncRNA	NA	"chr8|gi|377834516|ref|XR_142371.1|| strand:+ 119680450-119680462,119680465-119680643,119680644-119680667,119680672-119680685,119680687-119680939,119680940-119681049,119681070-119681288,119681295-119681376,119683460-119683656,"	seq1237	XR_142371.1	NA	chr8	+	119680448	119683656_x000D_
CUST_2734_PI428311958	5.21065	P	2.92384	A	4.87976	4.87976	up	0	CUST_2734_PI428311958	0	lncRNA	NA	"chr13|gi|229892208|ref|NR_027644.1|| strand:+ 88565824-88565901,88566166-88566367,88566493-88566714,88567406-88567525,88567827-88568025,88568883-88569262,88569263-88569344,88569349-88569354,88569375-88569469,88569471-88569579,"	seq2743	NR_027644.1	NA	chr13	+	88565824	88569576_x000D_
CUST_9446_PI428311958	6.32769	P	4.07716	A	4.75858	4.75858	up	0	CUST_9446_PI428311958	0	lncRNA	NA	"gi|293355007|ref|XR_005455.2| PREDICTED: Rattus norvegicus hypothetical protein LOC307347 (LOC307347), miscRNA"	seq9547	XR_005455.2	NA	NA	NA	NA	NA_x000D_
CUST_124_PI428311958	5.82353	P	3.59573	A	4.68419	4.68419	up	0	CUST_124_PI428311958	0	lncRNA	NA	"chr1|gi|377835423|ref|XR_140832.1|| strand:- 120518755-120518870,120518622-120518754,120518470-120518613,120518435-120518469,120518430-120518434,120518244-120518427,120516276-120516363,"	seq124	XR_140832.1	NA	chr1	-	120516272	120518872_x000D_
CUST_9052_PI428311958	6.75357	P	4.526	A	4.68343	4.68343	up	0	CUST_9052_PI428311958	0	lncRNA	NA	rn4_all_mrna_AY555740 range=chr20:35411696-35419409 5'pad=0 3'pad=0 strand=+ repeatMasking=none	seq9151	AY555740	NA	chr20	+	35411696	35419409_x000D_
CUST_3880_PI428311958	10.6121	P	8.392	P	4.65939	4.65939	up	0	CUST_3880_PI428311958	0	lncRNA	NA	rn4_all_mrna_FQ219861 range=chr2:8851546-8864382 5'pad=0 3'pad=0 strand=- repeatMasking=none	seq3901	FQ219861	NA	chr2	-	8851546	8864382_x000D_
CUST_6805_PI428311958	9.31963	P	7.12316	P	4.58356	4.58356	up	0	CUST_6805_PI428311958	0	lncRNA	NA	rn4_all_mrna_FQ212903 range=chrX:48744154-48745550 5'pad=0 3'pad=0 strand=- repeatMasking=none	seq6873	FQ212903	NA	chrX	-	48744154	48745550_x000D_
CUST_4787_PI428311958	6.63236	P	4.43969	A	4.57149	4.57149	up	0	CUST_4787_PI428311958	0	lncRNA	NA	rn4_all_mrna_BC092653 range=chr4:177731149-177745468 5'pad=0 3'pad=0 strand=+ repeatMasking=none	seq4818	BC092653	NA	chr4	+	177731149	177745468_x000D_
CUST_7567_PI428311958	6.01108	P	3.82619	A	4.54691	4.54691	up	0	CUST_7567_PI428311958	0	lncRNA	NA	rn4_all_mrna_BC079190 range=chr12:19828641-19834818 5'pad=0 3'pad=0 strand=+ repeatMasking=none	seq7643	BC079190	NA	chr12	+	19828641	19834818_x000D_
CUST_5281_PI428311958	5.66011	P	3.48243	A	4.52427	4.52427	up	0	CUST_5281_PI428311958	0	lncRNA	NA	rn4_all_mrna_FQ228852 range=chr5:63924126-63930633 5'pad=0 3'pad=0 strand=+ repeatMasking=none	seq5325	FQ228852	NA	chr5	+	63924126	63930633_x000D_
CUST_5181_PI428311958	5.6583	P	3.48749	A	4.50275	4.50275	up	0	CUST_5181_PI428311958	0	lncRNA	NA	rn4_all_mrna_FQ228859 range=chr5:1432580-1433495 5'pad=0 3'pad=0 strand=+ repeatMasking=none	seq5222	FQ228859	NA	chr5	+	1432580	1433495_x000D_
CUST_7356_PI428311958	5.41324	P	3.24785	A	4.48589	4.48589	up	0	CUST_7356_PI428311958	0	lncRNA	NA	rn4_all_mrna_FQ228563 range=chr11:51246009-51249617 5'pad=0 3'pad=0 strand=+ repeatMasking=none	seq7432	FQ228563	NA	chr11	+	51246009	51249617_x000D_
CUST_2036_PI428311958	8.86654	P	6.70409	P	4.47677	4.47677	up	0	CUST_2036_PI428311958	0	lncRNA	NA	"chr15|mm9_knownGene_uc007trn.2| strand:+ 28171301-28171323,28480599-28480688,28480784-28480894,28481022-28481068,"	seq2042	uc007trn.2	NA	chr15	+	28171300	28481068_x000D_
CUST_3310_PI428311958	8.47623	P	6.32648	P	4.43751	4.43751	up	0	CUST_3310_PI428311958	0	lncRNA	NA	rn4_all_mrna_FQ233002 range=chr1:32746962-32748465 5'pad=0 3'pad=0 strand=- repeatMasking=none	seq3322	FQ233002	NA	chr1	-	32746962	32748465_x000D_
CUST_6997_PI428311958	5.52872	P	3.39043	A	4.40243	4.40243	up	0	CUST_6997_PI428311958	0	lncRNA	NA	rn4_all_mrna_FQ232196 range=chr10:19206863-19211669 5'pad=0 3'pad=0 strand=- repeatMasking=none	seq7070	FQ232196	NA	chr10	-	19206863	19211669_x000D_
CUST_8822_PI428311958	5.35619	P	3.2286	A	4.36986	4.36986	up	0	CUST_8822_PI428311958	0	lncRNA	NA	rn4_all_mrna_FQ215458 range=chr18:78012062-78013116 5'pad=0 3'pad=0 strand=- repeatMasking=none	seq8918	FQ215458	NA	chr18	-	78012062	78013116_x000D_
CUST_8031_PI428311958	6.77271	P	4.66222	A	4.31837	4.31837	up	0	CUST_8031_PI428311958	0	lncRNA	NA	rn4_all_mrna_FQ233628 range=chr15:25165198-25166188 5'pad=0 3'pad=0 strand=+ repeatMasking=none	seq8115	FQ233628	NA	chr15	+	25165198	25166188_x000D_
CUST_5140_PI428311958	7.00233	P	4.89367	A	4.31293	4.31293	up	0	CUST_5140_PI428311958	0	lncRNA	NA	rn4_all_mrna_FQ219271 range=chr4:184035332-184066009 5'pad=0 3'pad=0 strand=- repeatMasking=none	seq5177	FQ219271	NA	chr4	-	184035332	184066009_x000D_
CUST_3516_PI428311958	6.29397	P	4.19411	A	4.28665	4.28665	up	0	CUST_3516_PI428311958	0	lncRNA	NA	rn4_all_mrna_BC168993 range=chr1:147065176-147084659 5'pad=0 3'pad=0 strand=+ repeatMasking=none	seq3530	BC168993	NA	chr1	+	147065176	147084659_x000D_
CUST_469_PI428311958	6.55234	P	4.45787	A	4.27067	4.27067	up	0	CUST_469_PI428311958	0	lncRNA	NA	"chr8|gi|377835655|ref|XR_140965.1|| strand:+ 119679755-119679761,119679764-119679791,119679793-119679874,119679904-119679914,119679920-119679972,119679981-119679998,119680005-119680018,119680020-119680088,119680089-119680093,119680096-119680100,119680102-119680270,119680273-119680293,119680295-119680297,119680841-119680939,119680940-119681047,119681070-119681288,119681295-119681376,119683460-119…	seq471	XR_140965.1	NA	chr8	+	119679755	119683654_x000D_
CUST_7136_PI428311958	5.54263	P	3.45424	A	4.25274	4.25274	up	0	CUST_7136_PI428311958	0	lncRNA	NA	rn4_all_mrna_AF158248 range=chr10:60115392-60135407 5'pad=0 3'pad=0 strand=+ repeatMasking=none	seq7209	AF158248	NA	chr10	+	60115392	60135407_x000D_
CUST_1355_PI428311958	6.7649	P	4.67975	A	4.24319	4.24319	up	0	CUST_1355_PI428311958	0	lncRNA	NA	"chr1|gi|377836975|ref|XR_141498.1|| strand:+ 207904456-207904462,207904812-207904859,207904860-207904929,207904934-207905054,207905056-207905085,207905087-207905103,207905118-207905243,"	seq1359	XR_141498.1	NA	chr1	+	207904448	207905248_x000D_
CUST_32_PI428311958	6.69882	P	4.61603	A	4.23626	4.23626	up	0	CUST_32_PI428311958	0	lncRNA	NA	"chr19|gi|377833371|ref|XR_141740.1|| strand:+ 13854556-13854586,13855192-13855340,13855441-13855519,13856286-13857220,13877164-13877245,13879115-13879179,13880433-13880538,13881180-13881347,13886079-13886201,13886617-13886661,"	seq32	XR_141740.1	NA	chr19	+	13854556	13886661_x000D_
CUST_6876_PI428311958	5.1943	P	3.11159	A	4.23603	4.23603	up	0	CUST_6876_PI428311958	0	lncRNA	NA	rn4_all_mrna_FQ225127 range=chrX:138267081-138268292 5'pad=0 3'pad=0 strand=- repeatMasking=none	seq6946	FQ225127	NA	chrX	-	138267081	138268292_x000D_
CUST_967_PI428311958	7.53229	P	5.45073	P	4.23266	4.23266	up	0	CUST_967_PI428311958	0	lncRNA	NA	"chr2|ri|C330045B02|PX00317O01|1042| strand:+ 51636050-51636205,51636206-51636386,51636387-51636449,51636459-51636476,51636478-51636522,51636524-51636571,51636572-51636587,51636589-51636602,51636603-51636647,51636682-51636694,51636696-51636761,51636762-51636826,51636827-51636922,51636923-51636942,51636945-51636958,51636959-51636964,51636965-51636989,51636991-51637091,"	seq970	PX00317O01	NA	chr2	+	51636050	51637091_x000D_
CUST_4130_PI428311958	5.40094	P	3.32124	A	4.22719	4.22719	up	0	CUST_4130_PI428311958	0	lncRNA	NA	rn4_all_mrna_FQ232622 range=chr2:180007649-180008993 5'pad=0 3'pad=0 strand=- repeatMasking=none	seq4153	FQ232622	NA	chr2	-	180007649	180008993_x000D_
CUST_9590_PI428311958	5.68621	P	3.60769	A	4.22374	4.22374	up	0	CUST_9590_PI428311958	0	lncRNA	NA	"gi|295851757|ref|XR_085722.2| PREDICTED: Rattus norvegicus prolylcarboxypeptidase isoform 1 preproprotein-like (LOC100363885), miscRNA"	seq9691	XR_085722.2	NA	NA	NA	NA	NA_x000D_
CUST_618_PI428311958	6.12391	P	4.05065	A	4.20836	4.20836	up	0	CUST_618_PI428311958	0	lncRNA	NA	"chr4|gi|377835331|ref|XR_140795.1|| strand:- 180658277-180658419,180651182-180651185,180650845-180651180,"	seq620	XR_140795.1	NA	chr4	-	180650845	180658419_x000D_
CUST_4758_PI428311958	7.26606	P	5.19294	A	4.20796	4.20796	up	0	CUST_4758_PI428311958	0	lncRNA	NA	rn4_all_mrna_BC107948 range=chr4:68903484-69234938 5'pad=0 3'pad=0 strand=+ repeatMasking=none	seq4788	BC107948	NA	chr4	+	68903484	69234938_x000D_
CUST_4959_PI428311958	5.21089	P	3.1488	A	4.17591	4.17591	up	0	CUST_4959_PI428311958	0	lncRNA	NA	rn4_all_mrna_FQ211116 range=chr4:100584053-100584793 5'pad=0 3'pad=0 strand=- repeatMasking=none	seq4993	FQ211116	NA	chr4	-	100584053	100584793_x000D_
CUST_986_PI428311958	5.93252	P	3.87889	A	4.15148	4.15148	up	0	CUST_986_PI428311958	0	lncRNA	NA	"chr7|mm9_knownGene_uc007guc.2| strand:- 29171031-29171111,29170649-29170759,29170590-29170646,29170548-29170567,29170539-29170544,29170464-29170537,29170418-29170453,29170340-29170413,29170287-29170323,29170136-29170286,29170098-29170135,29170013-29170047,29169967-29170012,29169894-29169965,29169796-29169882,29169781-29169793,29169652-29169769,29169637-29169651,29169586-29169589,29169581-2916958…	seq989	uc007guc.2	NA	chr7	-	29168085	29171111_x000D_
CUST_6672_PI428311958	6.38814	P	4.34184	A	4.13045	4.13045	up	0	CUST_6672_PI428311958	0	lncRNA	NA	rn4_all_mrna_FQ230077 range=chr9:85216308-85217457 5'pad=0 3'pad=0 strand=- repeatMasking=none	seq6738	FQ230077	NA	chr9	-	85216308	85217457_x000D_
CUST_6015_PI428311958	5.87286	P	3.84158	A	4.08767	4.08767	up	0	CUST_6015_PI428311958	0	lncRNA	NA	rn4_all_mrna_FQ233948 range=chr7:71757214-71758223 5'pad=0 3'pad=0 strand=- repeatMasking=none	seq6070	FQ233948	NA	chr7	-	71757214	71758223_x000D_
CUST_9261_PI428311958	7.58201	P	5.553	P	4.08122	4.08122	up	0	CUST_9261_PI428311958	0	lncRNA	NA	"gi|293343224|ref|XR_007917.2| PREDICTED: Rattus norvegicus similar to G protein-coupled receptor 56 (LOC682401), partial miscRNA"	seq9362	XR_007917.2	NA	NA	NA	NA	NA_x000D_
CUST_7035_PI428311958	5.81402	P	3.79687	A	4.04785	4.04785	up	0	CUST_7035_PI428311958	0	lncRNA	NA	rn4_all_mrna_AB012878 range=chr10:34711932-34721939 5'pad=0 3'pad=0 strand=+ repeatMasking=none	seq7108	AB012878	NA	chr10	+	34711932	34721939_x000D_
CUST_8834_PI428311958	6.08691	P	4.07306	A	4.03858	4.03858	up	0	CUST_8834_PI428311958	0	lncRNA	NA	rn4_all_mrna_AX765725 range=chr19:57394701-57413836 5'pad=0 3'pad=0 strand=+ repeatMasking=none	seq8930	AX765725	NA	chr19	+	57394701	57413836_x000D_
CUST_962_PI428311958	6.54587	P	4.54204	A	4.01063	4.01063	up	0	CUST_962_PI428311958	0	lncRNA	NA	"chr5|mm9_knownGene_uc012day.1| strand:+ 37156882-37156999,37169402-37169408,37169420-37170002,37179777-37180122,37187614-37187821,37198125-37198338,37218720-37218791,37222837-37223149,37229717-37229920,37229921-37229928,37229930-37229934,37229935-37229945,37229949-37230056,37230058-37230079,37230081-37230099,37230107-37230183,"	seq965	uc012day.1	NA	chr5	+	37156882	37230183_x000D_
CUST_5118_PI428311958	6.91091	P	4.92596	A	3.95849	3.95849	up	0	CUST_5118_PI428311958	0	lncRNA	NA	rn4_all_mrna_AF240766 range=chr4:169227316-169228209 5'pad=0 3'pad=0 strand=- repeatMasking=none	seq5155	AF240766	NA	chr4	-	169227316	169228209_x000D_
CUST_957_PI428311958	5.82514	P	3.85668	A	3.91351	3.91351	up	0	CUST_957_PI428311958	0	lncRNA	NA	"chr6|gi|377835916|ref|XR_141129.1|| strand:+ 135413613-135413638,135413640-135413673,135413677-135413710,135413713-135413723,135413726-135413835,135413839-135413876,135413878-135413913,135413927-135414016,135414018-135414026,135414027-135414116,135414120-135414137,135414140-135414253,135414752-135414838,"	seq960	XR_141129.1	NA	chr6	+	135413613	135414838_x000D_
CUST_3775_PI428311958	8.53906	P	6.57513	P	3.90122	3.90122	up	0	CUST_3775_PI428311958	0	lncRNA	NA	rn4_all_mrna_BC107660 range=chr1:246474789-246476393 5'pad=0 3'pad=0 strand=- repeatMasking=none	seq3792	BC107660	NA	chr1	-	246474789	246476393_x000D_
CUST_4351_PI428311958	5.20318	P	3.28483	A	3.77989	3.77989	up	0	CUST_4351_PI428311958	0	lncRNA	NA	rn4_all_mrna_FQ221618 range=chr3:1517907-1518599 5'pad=0 3'pad=0 strand=+ repeatMasking=none	seq4376	FQ221618	NA	chr3	+	1517907	1518599_x000D_
CUST_5900_PI428311958	6.27437	P	4.37744	A	3.72419	3.72419	up	0	CUST_5900_PI428311958	0	lncRNA	NA	rn4_all_mrna_FQ233444 range=chr7:11196385-11198124 5'pad=0 3'pad=0 strand=- repeatMasking=none	seq5954	FQ233444	NA	chr7	-	11196385	11198124_x000D_
CUST_6148_PI428311958	5.55505	P	3.66206	A	3.71404	3.71404	up	0	CUST_6148_PI428311958	0	lncRNA	NA	rn4_all_mrna_FQ211319 range=chr7:138597119-138598089 5'pad=0 3'pad=0 strand=- repeatMasking=none	seq6205	FQ211319	NA	chr7	-	138597119	138598089_x000D_
CUST_1857_PI428311958	9.83971	P	7.94916	P	3.70778	3.70778	up	0	CUST_1857_PI428311958	0	lncRNA	NA	"chrX|gi|358331464|ref|NR_045569.1|| strand:- 58580964-58581238,58580899-58580963,58577032-58577081,58572481-58572522,58565344-58565433,58557394-58557508,58521489-58521495,58521469-58521476,58521367-58521457,58521171-58521365,58521059-58521169,"	seq1863	NR_045569.1	NA	chrX	-	58521060	58581240_x000D_
CUST_1802_PI428311958	8.91246	P	7.02689	P	3.69499	3.69499	up	0	CUST_1802_PI428311958	0	lncRNA	NA	"chr7|mm9_knownGene_uc007wwx.2| strand:- 120045205-120045432,120044532-120045191,120044497-120044530,120044099-120044493,120044094-120044097,120043737-120044093,120041842-120042036,120035849-120035890,120035844-120035847,120035694-120035837,"	seq1808	uc007wwx.2	NA	chr7	-	120035696	120045432_x000D_
CUST_5923_PI428311958	6.29412	P	4.41305	A	3.68349	3.68349	up	0	CUST_5923_PI428311958	0	lncRNA	NA	rn4_all_mrna_FQ225254 range=chr7:21207786-21209132 5'pad=0 3'pad=0 strand=- repeatMasking=none	seq5977	FQ225254	NA	chr7	-	21207786	21209132_x000D_
CUST_3534_PI428311958	6.4243	P	4.5435	A	3.68279	3.68279	up	0	CUST_3534_PI428311958	0	lncRNA	NA	rn4_all_mrna_BC158768 range=chr1:157217625-157262802 5'pad=0 3'pad=0 strand=+ repeatMasking=none	seq3548	BC158768	NA	chr1	+	157217625	157262802_x000D_
CUST_1632_PI428311958	6.24134	P	4.36413	A	3.67364	3.67364	up	0	CUST_1632_PI428311958	0	lncRNA	NA	"chr15|mm9_knownGene_uc007ugq.1| strand:- 41943119-41943135,41943113-41943115,41942973-41943112,41942930-41942972,41942691-41942929,41942619-41942689,41942557-41942616,41942527-41942552,41942436-41942526,41942369-41942424,41942291-41942326,41942252-41942280,41942197-41942235,41942172-41942193,41942075-41942162,41942045-41942074,41942030-41942035,41941904-41942029,41941817-41941899,41941567-419418…	seq1638	uc007ugq.1	NA	chr15	-	41940096	41943136_x000D_
CUST_6806_PI428311958	9.55457	P	7.67931	P	3.66867	3.66867	up	0	CUST_6806_PI428311958	0	lncRNA	NA	rn4_all_mrna_FQ216347 range=chrX:48744668-48746053 5'pad=0 3'pad=0 strand=- repeatMasking=none	seq6874	FQ216347	NA	chrX	-	48744668	48746053_x000D_
CUST_2106_PI428311958	5.26277	P	3.40672	A	3.62015	3.62015	up	0	CUST_2106_PI428311958	0	lncRNA	NA	"chr2|mm9_knownGene_uc011zcr.1| strand:- 22606940-22606960,22606812-22606937,22606793-22606799,22606737-22606792,22603314-22603443,22600152-22600340,22596280-22596396,22595615-22595749,22595590-22595609,22595534-22595585,22595522-22595533,22595462-22595487,22595455-22595459,22595399-22595438,22595374-22595396,22595224-22595304,"	seq2112	uc011zcr.1	NA	chr2	-	22595224	22606960_x000D_
CUST_9233_PI428311958	7.15138	P	5.30346	P	3.59981	3.59981	up	0	CUST_9233_PI428311958	0	lncRNA	NA	"gi|293341917|ref|XR_008228.2| PREDICTED: Rattus norvegicus similar to MYST histone acetyltransferase monocytic leukemia 4 (RGD1566399), miscRNA"	seq9334	XR_008228.2	NA	NA	NA	NA	NA_x000D_
CUST_1784_PI428311958	7.07391	P	5.22997	A	3.58988	3.58988	up	0	CUST_1784_PI428311958	0	lncRNA	NA	"chr7|gi|255308897|ref|NR_028279.1|| strand:+ 16141927-16141935,16141940-16142033,16144159-16144422,16144423-16144553,16144587-16144599,16144601-16144604,16144605-16144668,16144671-16144682,16144692-16144713,16144714-16144824,16144834-16144953,16144972-16145315,16145316-16145624,16145706-16145775,16145847-16145923,16148427-16148484,16148585-16148686,16148800-16148965,16149050-16149084,16149173-16…	seq1790	NR_028279.1	NA	chr7	+	16141927	16149438_x000D_
CUST_8472_PI428311958	5.82654	P	4.00688	A	3.52998	3.52998	up	0	CUST_8472_PI428311958	0	lncRNA	NA	rn4_all_mrna_BC092615 range=chr17:13201275-13213050 5'pad=0 3'pad=0 strand=+ repeatMasking=none	seq8563	BC092615	NA	chr17	+	13201275	13213050_x000D_
CUST_9721_PI428311958	7.65928	P	5.84169	P	3.52493	3.52493	up	0	CUST_9721_PI428311958	0	lncRNA	NA	"gi|295852158|ref|XR_006448.3| PREDICTED: Rattus norvegicus similar to cyclin B2 (LOC498601), miscRNA"	seq9822	XR_006448.3	NA	NA	NA	NA	NA_x000D_
CUST_2640_PI428311958	9.23856	P	7.42156	P	3.52349	3.52349	up	0	CUST_2640_PI428311958	0	lncRNA	NA	"chr12|mm9_knownGene_uc012efl.1| strand:- 17864287-17864569,17863467-17863623,17862828-17863151,17862056-17862129,17861262-17861424,17860868-17861020,17860739-17860758,17860717-17860723,17860616-17860716,17860544-17860546,17860387-17860527,17860135-17860304,17858952-17859249,17858822-17858951,17858807-17858816,17858754-17858805,17858732-17858748,17858574-17858684,17858498-17858573,17858471-178584…	seq2649	uc012efl.1	NA	chr12	-	17858360	17864568_x000D_
CUST_6079_PI428311958	5.8678	P	4.05189	A	3.52082	3.52082	up	0	CUST_6079_PI428311958	0	lncRNA	NA	rn4_all_mrna_AB042192 range=chr7:117406491-117420764 5'pad=0 3'pad=0 strand=- repeatMasking=none	seq6135	AB042192	NA	chr7	-	117406491	117420764_x000D_
CUST_4381_PI428311958	7.40283	P	5.60154	P	3.48533	3.48533	up	0	CUST_4381_PI428311958	0	lncRNA	NA	rn4_all_mrna_U03414 range=chr3:7157841-7179289 5'pad=0 3'pad=0 strand=+ repeatMasking=none	seq4407	U03414	NA	chr3	+	7157841	7179289_x000D_
CUST_3257_PI428311958	7.75348	P	5.95801	P	3.47129	3.47129	up	0	CUST_3257_PI428311958	0	lncRNA	NA	rn4_all_mrna_BC079474 range=chr1:226591020-226646886 5'pad=0 3'pad=0 strand=- repeatMasking=none	seq3269	BC079474	NA	chr1	-	226591020	226646886_x000D_
CUST_2717_PI428311958	7.48302	P	5.69387	P	3.45612	3.45612	up	0	CUST_2717_PI428311958	0	lncRNA	NA	"chr1|gi|254911091|ref|NR_028143.1|| strand:- 122381173-122381400,122366998-122367038,122357496-122357533,122356460-122356597,122307891-122307997,122304241-122304247,122294457-122294557,122284689-122284864,122282619-122282778,122268717-122268799,122268669-122268716,122268660-122268667,122268655-122268659,122268614-122268650,122268607-122268611,122268581-122268591,122268344-122268563,122268163-122…	seq2726	NR_028143.1	NA	chr1	-	122267088	122381400_x000D_
CUST_2238_PI428311958	7.70494	P	5.91856	P	3.44949	3.44949	up	0	CUST_2238_PI428311958	0	lncRNA	NA	"chr19|mm9_knownGene_uc009mxm.2| strand:- 10475382-10475507,10475309-10475351,10475286-10475297,10452234-10452236,10449913-10449983,10449020-10449427,10447185-10447314,10447029-10447035,10446683-10446811,10446251-10446382,10445702-10445818,10445291-10445330,10444941-10445044,10443974-10444068,10442481-10442751,10441655-10441763,10440244-10440512,10439527-10439679,10439460-10439508,10439394-104394…	seq2244	uc009mxm.2	NA	chr19	-	10438329	10475507_x000D_
CUST_8395_PI428311958	11.7914	P	10.0202	P	3.41352	3.41352	up	0	CUST_8395_PI428311958	0	lncRNA	NA	rn4_all_mrna_FQ216882 range=chr16:71526131-71526834 5'pad=0 3'pad=0 strand=+ repeatMasking=none	seq8486	FQ216882	NA	chr16	+	71526131	71526834_x000D_
CUST_8227_PI428311958	5.3426	P	3.57221	A	3.41147	3.41147	up	0	CUST_8227_PI428311958	0	lncRNA	NA	rn4_all_mrna_FQ217569 range=chr15:81556239-81556781 5'pad=0 3'pad=0 strand=- repeatMasking=none	seq8316	FQ217569	NA	chr15	-	81556239	81556781_x000D_
CUST_8133_PI428311958	8.88585	P	7.11615	P	3.40982	3.40982	up	0	CUST_8133_PI428311958	0	lncRNA	NA	rn4_all_mrna_BC091273 range=chr15:30634921-30635543 5'pad=0 3'pad=0 strand=- repeatMasking=none	seq8219	BC091273	NA	chr15	-	30634921	30635543_x000D_
CUST_2535_PI428311958	6.47897	P	4.71252	A	3.40215	3.40215	up	0	CUST_2535_PI428311958	0	lncRNA	NA	"chr5|mm9_knownGene_uc012dax.1| strand:+ 37156882-37156999,37169402-37169408,37169420-37170002,37179777-37180122,37187577-37187821,37198125-37198338,37218720-37218799,37218813-37218831,37218834-37218894,37218926-37218932,37218935-37218938,37218939-37218956,37219028-37219048,37219065-37219080,37219083-37219104,37219177-37219211,37219225-37219237,37219245-37219335,37219337-37219490,37219510-3721961…	seq2544	uc012dax.1	NA	chr5	+	37156880	37230184_x000D_
CUST_8299_PI428311958	6.78439	P	5.02221	A	3.39209	3.39209	up	0	CUST_8299_PI428311958	0	lncRNA	NA	rn4_all_mrna_AB190259 range=chr16:6661286-6663694 5'pad=0 3'pad=0 strand=+ repeatMasking=none	seq8389	AB190259	NA	chr16	+	6661286	6663694_x000D_
CUST_6807_PI428311958	5.79531	P	4.05303	A	3.34563	3.34563	up	0	CUST_6807_PI428311958	0	lncRNA	NA	rn4_all_mrna_FQ211634 range=chrX:48879233-48880221 5'pad=0 3'pad=0 strand=- repeatMasking=none	seq6875	FQ211634	NA	chrX	-	48879233	48880221_x000D_
CUST_7025_PI428311958	8.12849	P	6.38724	P	3.34325	3.34325	up	0	CUST_7025_PI428311958	0	lncRNA	NA	rn4_all_mrna_FQ212352 range=chr10:31065836-31066781 5'pad=0 3'pad=0 strand=- repeatMasking=none	seq7098	FQ212352	NA	chr10	-	31065836	31066781_x000D_
CUST_2391_PI428311958	6.0833	P	4.34638	A	3.33321	3.33321	up	0	CUST_2391_PI428311958	0	lncRNA	NA	"chr9|gi|377834767|ref|XR_140441.1|| strand:- 74720922-74721030,74720912-74720918,74720889-74720907,74720878-74720887,74720871-74720877,74720765-74720870,74720286-74720449,"	seq2399	XR_140441.1	NA	chr9	-	74720288	74721032_x000D_
CUST_8728_PI428311958	5.34561	P	3.61272	A	3.32393	3.32393	up	0	CUST_8728_PI428311958	0	lncRNA	NA	rn4_all_mrna_FQ226763 range=chr18:30542553-30543643 5'pad=0 3'pad=0 strand=- repeatMasking=none	seq8823	FQ226763	NA	chr18	-	30542553	30543643_x000D_
CUST_1629_PI428311958	5.8984	P	4.17385	A	3.30477	3.30477	up	0	CUST_1629_PI428311958	0	lncRNA	NA	"chr8|gi|377835642|ref|XR_140957.1|| strand:+ 108526679-108526712,108526714-108526725,108526726-108527018,108530614-108530769,"	seq1635	XR_140957.1	NA	chr8	+	108526680	108530768_x000D_
CUST_1380_PI428311958	8.57295	P	6.85733	P	3.28438	3.28438	up	0	CUST_1380_PI428311958	0	lncRNA	NA	"chr1|mm9_knownGene_uc008hfe.2| strand:- 236228820-236228903,236169560-236170399,236167392-236167422,236166554-236166632,236155632-236155749,236138753-236138906,236134516-236134682,236133644-236133827,236133614-236133619,236133563-236133613,236133377-236133562,236133267-236133376,236133183-236133264,236133122-236133175,236133068-236133118,236132958-236133063,236132949-236132952,236132746-23613294…	seq1384	uc008hfe.2	NA	chr1	-	236132000	236228896_x000D_
CUST_2394_PI428311958	7.76716	P	6.05171	P	3.28398	3.28398	up	0	CUST_2394_PI428311958	0	lncRNA	NA	"chr1|gi|309263984|ref|XR_107183.1|| strand:- 249371155-249371172,249371037-249371153,249370951-249371032,249370766-249370947,249370742-249370764,249370673-249370738,249370620-249370672,249370596-249370614,"	seq2402	XR_107183.1	NA	chr1	-	249370592	249371168_x000D_
CUST_461_PI428311958	6.35717	P	4.64937	A	3.26663	3.26663	up	0	CUST_461_PI428311958	0	lncRNA	NA	"chr5|mm9_knownGene_uc012daw.1| strand:+ 37156882-37156999,37169402-37169408,37169420-37170002,37179777-37180122,37187577-37187819,37198123-37198338,37218720-37218791,37222837-37223149,37229314-37229327,37229715-37229920,37229921-37229928,37229930-37229934,37229935-37229945,37229949-37230056,37230058-37230079,37230081-37230099,37230107-37230183,"	seq463	uc012daw.1	NA	chr5	+	37156882	37230183_x000D_
CUST_4230_PI428311958	5.15088	P	3.44684	A	3.25814	3.25814	up	0	CUST_4230_PI428311958	0	lncRNA	NA	rn4_all_mrna_FQ225613 range=chr2:205018384-205019277 5'pad=0 3'pad=0 strand=+ repeatMasking=none	seq4255	FQ225613	NA	chr2	+	205018384	205019277_x000D_
CUST_5202_PI428311958	5.82682	P	4.12627	A	3.25026	3.25026	up	0	CUST_5202_PI428311958	0	lncRNA	NA	rn4_all_mrna_FQ227923 range=chr5:14609777-14610387 5'pad=0 3'pad=0 strand=- repeatMasking=none	seq5243	FQ227923	NA	chr5	-	14609777	14610387_x000D_
CUST_7589_PI428311958	8.28772	P	6.58751	P	3.24949	3.24949	up	0	CUST_7589_PI428311958	0	lncRNA	NA	rn4_all_mrna_FQ211951 range=chr12:32265684-32266438 5'pad=0 3'pad=0 strand=+ repeatMasking=none	seq7665	FQ211951	NA	chr12	+	32265684	32266438_x000D_
CUST_3773_PI428311958	6.76401	P	5.06954	A	3.23657	3.23657	up	0	CUST_3773_PI428311958	0	lncRNA	NA	rn4_all_mrna_FQ228122 range=chr1:245805868-245806355 5'pad=0 3'pad=0 strand=+ repeatMasking=none	seq3790	FQ228122	NA	chr1	+	245805868	245806355_x000D_
CUST_1725_PI428311958	5.73094	P	4.03803	A	3.23309	3.23309	up	0	CUST_1725_PI428311958	0	lncRNA	NA	"chr5|ri|1110002J03|R000015O03|1548| strand:+ 94285150-94285211,94285228-94285244,94285247-94285258,94285259-94285270,94285272-94285298,94285303-94285445,94285446-94285456,94285457-94285573,94285586-94285593,94285606-94285612,94285620-94285635,94285647-94285731,94285734-94286141,94286142-94286195,94286196-94286263,94286266-94286454,94286455-94286481,94286482-94286656,"	seq1731	R000015O03	NA	chr5	+	94285152	94286656_x000D_
CUST_6898_PI428311958	5.8975	P	4.20584	A	3.2303	3.2303	up	0	CUST_6898_PI428311958	0	lncRNA	NA	rn4_all_mrna_BC081759 range=chr10:780292-814272 5'pad=0 3'pad=0 strand=- repeatMasking=none	seq6969	BC081759	NA	chr10	-	780292	814272_x000D_
CUST_6159_PI428311958	5.21685	P	3.54649	A	3.18294	3.18294	up	0	CUST_6159_PI428311958	0	lncRNA	NA	rn4_all_mrna_FQ213315 range=chr7:141080464-141081755 5'pad=0 3'pad=0 strand=+ repeatMasking=none	seq6216	FQ213315	NA	chr7	+	141080464	141081755_x000D_
CUST_8688_PI428311958	5.75889	P	4.09084	A	3.17785	3.17785	up	0	CUST_8688_PI428311958	0	lncRNA	NA	rn4_all_mrna_BC090338 range=chr18:16920494-16952421 5'pad=0 3'pad=0 strand=+ repeatMasking=none	seq8782	BC090338	NA	chr18	+	16920494	16952421_x000D_
CUST_8220_PI428311958	6.64057	P	4.98203	A	3.15698	3.15698	up	0	CUST_8220_PI428311958	0	lncRNA	NA	rn4_all_mrna_FQ227629 range=chr15:60206756-60207623 5'pad=0 3'pad=0 strand=+ repeatMasking=none	seq8309	FQ227629	NA	chr15	+	60206756	60207623_x000D_
CUST_6998_PI428311958	5.87985	P	4.23498	A	3.12719	3.12719	up	0	CUST_6998_PI428311958	0	lncRNA	NA	rn4_all_mrna_FQ233602 range=chr10:19229123-19230217 5'pad=0 3'pad=0 strand=- repeatMasking=none	seq7071	FQ233602	NA	chr10	-	19229123	19230217_x000D_
CUST_6528_PI428311958	6.83363	P	5.18906	A	3.12654	3.12654	up	0	CUST_6528_PI428311958	0	lncRNA	NA	rn4_all_mrna_FQ226455 range=chr9:4623752-4625412 5'pad=0 3'pad=0 strand=+ repeatMasking=none	seq6592	FQ226455	NA	chr9	+	4623752	4625412_x000D_
CUST_8183_PI428311958	7.18787	P	5.54938	P	3.11339	3.11339	up	0	CUST_8183_PI428311958	0	lncRNA	NA	rn4_all_mrna_FQ234465 range=chr15:41993507-41994301 5'pad=0 3'pad=0 strand=- repeatMasking=none	seq8271	FQ234465	NA	chr15	-	41993507	41994301_x000D_
CUST_4382_PI428311958	7.39801	P	5.76329	P	3.10527	3.10527	up	0	CUST_4382_PI428311958	0	lncRNA	NA	rn4_all_mrna_U03415 range=chr3:7170421-7179289 5'pad=0 3'pad=0 strand=+ repeatMasking=none	seq4408	U03415	NA	chr3	+	7170421	7179289_x000D_
CUST_8856_PI428311958	6.68889	P	5.05504	A	3.10341	3.10341	up	0	CUST_8856_PI428311958	0	lncRNA	NA	rn4_all_mrna_AY325245 range=chr19:22874584-22910355 5'pad=0 3'pad=0 strand=- repeatMasking=none	seq8952	AY325245	NA	chr19	-	22874584	22910355_x000D_
CUST_8292_PI428311958	6.02433	P	4.39408	A	3.09566	3.09566	up	0	CUST_8292_PI428311958	0	lncRNA	NA	rn4_all_mrna_FQ234482 range=chr16:6121903-6123489 5'pad=0 3'pad=0 strand=- repeatMasking=none	seq8382	FQ234482	NA	chr16	-	6121903	6123489_x000D_
CUST_1926_PI428311958	7.17794	P	5.54836	A	3.09423	3.09423	up	0	CUST_1926_PI428311958	0	lncRNA	NA	"chr1|mm9_knownGene_uc008hqc.1| strand:+ 249986471-249986803,249987893-249987898,249989665-249989701,249990341-249990359,249990361-249990569,249990573-249991067,249992035-249992040,249993540-249993595,249997987-249998993,249998995-249999062,249999064-249999098,249999099-249999124,249999128-249999307,249999310-249999471,249999947-250000017,250004435-250004557,250005331-250005498,250007983-25000808…	seq1932	uc008hqc.1	NA	chr1	+	249986464	250048880_x000D_
CUST_9304_PI428311958	5.79122	P	4.16343	A	3.09038	3.09038	up	0	CUST_9304_PI428311958	0	lncRNA	NA	"gi|293345571|ref|XR_085766.1| PREDICTED: Rattus norvegicus hypothetical protein LOC690126 (LOC690126), miscRNA"	seq9405	XR_085766.1	NA	NA	NA	NA	NA_x000D_
CUST_16_PI428311958	6.33383	P	4.71514	A	3.07096	3.07096	up	0	CUST_16_PI428311958	0	lncRNA	NA	"chr7|ri|B430006P10|PX00070N08|2382| strand:+ 97686849-97687900,97687911-97687947,97687956-97688007,97688008-97688047,97688049-97688118,97688119-97688218,97688242-97688269,97688276-97688553,97688557-97688561,97688563-97688612,97688613-97688616,97692107-97692252,97692253-97692330,97692347-97692371,97692386-97692422,97692569-97692607,97692653-97692659,97692667-97692723,97692726-97692743,"	seq16	PX00070N08	NA	chr7	+	97686848	97692744_x000D_
CUST_7634_PI428311958	13.658	P	12.0409	P	3.06757	3.06757	up	0	CUST_7634_PI428311958	0	lncRNA	NA	rn4_all_mrna_JQ258942 range=chr12:46471506-46483380 5'pad=0 3'pad=0 strand=- repeatMasking=none	seq7711	JQ258942	NA	chr12	-	46471506	46483380_x000D_
CUST_1519_PI428311958	5.56113	P	3.95523	A	3.04387	3.04387	up	0	CUST_1519_PI428311958	0	lncRNA	NA	"chrX|mm9_knownGene_uc009son.2| strand:+ 26317382-26317531,26318172-26318339,26319568-26319689,26320065-26320108,26320363-26320544,26320624-26320754,26322407-26322525,26322684-26322689,26322708-26322809,26324412-26324488,26324574-26324637,26324736-26325244,26325246-26325299,26325300-26325305,26325306-26325324,26325333-26325347,26325371-26325467,26325468-26325518,26325533-26325672,26325793-2632590…	seq1524	uc009son.2	NA	chrX	+	26317382	26330176_x000D_
CUST_7237_PI428311958	6.46554	P	4.85995	A	3.04321	3.04321	up	0	CUST_7237_PI428311958	0	lncRNA	NA	rn4_all_mrna_FQ212806 range=chr10:84538390-84539615 5'pad=0 3'pad=0 strand=- repeatMasking=none	seq7310	FQ212806	NA	chr10	-	84538390	84539615_x000D_
CUST_5656_PI428311958	5.95605	P	4.35407	A	3.03559	3.03559	up	0	CUST_5656_PI428311958	0	lncRNA	NA	rn4_all_mrna_FQ229734 range=chr6:53779297-53780321 5'pad=0 3'pad=0 strand=+ repeatMasking=none	seq5706	FQ229734	NA	chr6	+	53779297	53780321_x000D_
CUST_1475_PI428311958	11.2877	P	9.68937	P	3.02783	3.02783	up	0	CUST_1475_PI428311958	0	lncRNA	NA	"chr1|ri|C730024P13|PX00689J19|1700| strand:+ 135114956-135115127,135115128-135115156,135115170-135115270,135115277-135115307,135115312-135115516,135115531-135115576,135115577-135115604,135115605-135115707,135115709-135115782,135115792-135115816,135115817-135115828,135115829-135115903,135115905-135115912,135115918-135116170,135116186-135116201,135116202-135116469,135116477-135116482,135116483-135…	seq1480	PX00689J19	NA	chr1	+	135114960	135116592_x000D_
CUST_4243_PI428311958	6.32675	P	4.75104	A	2.98083	2.98083	up	0	CUST_4243_PI428311958	0	lncRNA	NA	rn4_all_mrna_FQ234058 range=chr2:214247310-214248433 5'pad=0 3'pad=0 strand=+ repeatMasking=none	seq4268	FQ234058	NA	chr2	+	214247310	214248433_x000D_
CUST_8509_PI428311958	6.07252	P	4.50448	A	2.96501	2.96501	up	0	CUST_8509_PI428311958	0	lncRNA	NA	rn4_all_mrna_FQ226362 range=chr17:24042517-24043984 5'pad=0 3'pad=0 strand=+ repeatMasking=none	seq8600	FQ226362	NA	chr17	+	24042517	24043984_x000D_
CUST_9477_PI428311958	5.43897	P	3.88047	A	2.94547	2.94547	up	0	CUST_9477_PI428311958	0	lncRNA	NA	"gi|293359329|ref|XR_086258.1| PREDICTED: Rattus norvegicus F-box and leucine-rich repeat protein 18 (LOC100359528), miscRNA"	seq9578	XR_086258.1	NA	NA	NA	NA	NA_x000D_
CUST_6106_PI428311958	5.81536	P	4.2618	A	2.93541	2.93541	up	0	CUST_6106_PI428311958	0	lncRNA	NA	rn4_all_mrna_FQ226503 range=chr7:120253213-120257375 5'pad=0 3'pad=0 strand=- repeatMasking=none	seq6162	FQ226503	NA	chr7	-	120253213	120257375_x000D_
CUST_7699_PI428311958	5.52405	P	3.9899	A	2.89617	2.89617	up	0	CUST_7699_PI428311958	0	lncRNA	NA	rn4_all_mrna_FQ225562 range=chr13:51287044-51288227 5'pad=0 3'pad=0 strand=- repeatMasking=none	seq7777	FQ225562	NA	chr13	-	51287044	51288227_x000D_
CUST_8123_PI428311958	7.28717	P	5.75503	P	2.89214	2.89214	up	0	CUST_8123_PI428311958	0	lncRNA	NA	rn4_all_mrna_BC093392 range=chr15:29381623-29382192 5'pad=0 3'pad=0 strand=+ repeatMasking=none	seq8209	BC093392	NA	chr15	+	29381623	29382192_x000D_
CUST_5769_PI428311958	7.88023	P	6.35396	P	2.8804	2.8804	up	0	CUST_5769_PI428311958	0	lncRNA	NA	rn4_all_mrna_FQ230683 range=chr6:115177106-115178150 5'pad=0 3'pad=0 strand=- repeatMasking=none	seq5819	FQ230683	NA	chr6	-	115177106	115178150_x000D_
CUST_9194_PI428311958	9.48241	P	7.96976	P	2.85333	2.85333	up	0	CUST_9194_PI428311958	0	lncRNA	NA	"gi|222080110|ref|NR_026689.1| Rattus norvegicus hypothetical protein LOC686120 (LOC686120), non-coding RNA"	seq9295	NR_026689.1	NA	NA	NA	NA	NA_x000D_
CUST_9322_PI428311958	7.53255	P	6.02433	P	2.8446	2.8446	up	0	CUST_9322_PI428311958	0	lncRNA	NA	"gi|293346298|ref|XR_085785.1| PREDICTED: Rattus norvegicus non-SMC condensin I complex, subunit H (Ncaph), miscRNA"	seq9423	XR_085785.1	NA	NA	NA	NA	NA_x000D_
CUST_981_PI428311958	6.75395	P	5.25582	A	2.82477	2.82477	up	0	CUST_981_PI428311958	0	lncRNA	NA	"chr3|mm9_knownGene_uc008kjb.1| strand:- 67934489-67935167,67934441-67934487,67934357-67934440,67934223-67934354,67934182-67934189,67934121-67934166,67934095-67934118,67934068-67934093,"	seq984	uc008kjb.1	NA	chr3	-	67934068	67935167_x000D_
CUST_2541_PI428311958	6.07038	P	4.57446	A	2.82043	2.82043	up	0	CUST_2541_PI428311958	0	lncRNA	NA	"chrX|mm9_knownGene_uc009tdb.1| strand:- 135956825-135956987,135885660-135885786,135878455-135878491,135878420-135878434,135878416-135878419,135878357-135878413,135867577-135867622,135867548-135867571,135867450-135867520,135867428-135867448,"	seq2550	uc009tdb.1	NA	chrX	-	135867424	135956992_x000D_
CUST_7086_PI428311958	8.32252	P	6.83042	P	2.81299	2.81299	up	0	CUST_7086_PI428311958	0	lncRNA	NA	rn4_all_mrna_FQ227504 range=chr10:46941115-46942282 5'pad=0 3'pad=0 strand=- repeatMasking=none	seq7159	FQ227504	NA	chr10	-	46941115	46942282_x000D_
CUST_7945_PI428311958	5.31667	P	3.82597	A	2.81026	2.81026	up	0	CUST_7945_PI428311958	0	lncRNA	NA	rn4_all_mrna_FQ225373 range=chr14:57318691-57319993 5'pad=0 3'pad=0 strand=- repeatMasking=none	seq8028	FQ225373	NA	chr14	-	57318691	57319993_x000D_
CUST_783_PI428311958	13.6413	P	12.153	P	2.80544	2.80544	up	0	CUST_783_PI428311958	0	lncRNA	NA	"chr12|mm9_knownGene_uc012eba.1| strand:- 46473413-46473440,46473269-46473402,46472975-46473078,46472792-46472864,46472746-46472788,46471539-46471702,46471493-46471534,"	seq786	uc012eba.1	NA	chr12	-	46471493	46473440_x000D_
CUST_1288_PI428311958	8.15364	P	6.66762	P	2.80116	2.80116	up	0	CUST_1288_PI428311958	0	lncRNA	NA	"chr13|ri|6330500C23|PX00315I07|815| strand:- 89539260-89539452,89539179-89539253,89539098-89539177,89539074-89539080,89538957-89539073,89538949-89538956,89538642-89538948,"	seq1292	PX00315I07	NA	chr13	-	89538640	89539456_x000D_
CUST_9795_PI428311958	11.2525	P	9.76883	P	2.79661	2.79661	up	0	CUST_9795_PI428311958	0	lncRNA	NA	"gi|295852551|ref|XR_086329.2| PREDICTED: Rattus norvegicus similar to solute carrier family 22 (organic cation transporter), member 13 (LOC685081), miscRNA"	seq9896	XR_086329.2	NA	NA	NA	NA	NA_x000D_
CUST_1849_PI428311958	8.3267	P	6.84552	P	2.79177	2.79177	up	0	CUST_1849_PI428311958	0	lncRNA	NA	"chr11|gi|84781715|ref|NR_002700.1|| strand:- 17257833-17257875,17257808-17257832,17257724-17257783,17257711-17257723,17254325-17254479,17249975-17250114,17246106-17246313,17241910-17242296,17241779-17241909,17241768-17241778,17241684-17241767,17241627-17241681,"	seq1855	NR_002700.1	NA	chr11	-	17241628	17257876_x000D_
CUST_8360_PI428311958	11.2261	P	9.74915	P	2.78364	2.78364	up	0	CUST_8360_PI428311958	0	lncRNA	NA	rn4_all_mrna_BC086510 range=chr16:49493092-49518644 5'pad=0 3'pad=0 strand=+ repeatMasking=none	seq8451	BC086510	NA	chr16	+	49493092	49518644_x000D_
CUST_5169_PI428311958	9.91492	P	8.43812	P	2.7833	2.7833	up	0	CUST_5169_PI428311958	0	lncRNA	NA	rn4_all_mrna_FQ228543 range=chr5:125905462-125995357 5'pad=0 3'pad=0 strand=+ repeatMasking=none	seq5209	FQ228543	NA	chr5	+	125905462	125995357_x000D_
CUST_229_PI428311958	9.51449	P	8.03899	P	2.7808	2.7808	up	0	CUST_229_PI428311958	0	lncRNA	NA	"chr8|ri|1190002N15|R000019B21|866| strand:- 99572723-99572862,99572639-99572721,99572600-99572609,99572459-99572583,99572415-99572456,99572339-99572407,99572152-99572315,99571996-99572151,"	seq229	R000019B21	NA	chr8	-	99572000	99572864_x000D_
CUST_4079_PI428311958	5.93953	P	4.46423	A	2.78041	2.78041	up	0	CUST_4079_PI428311958	0	lncRNA	NA	rn4_all_mrna_FQ230606 range=chr2:149834295-149835399 5'pad=0 3'pad=0 strand=+ repeatMasking=none	seq4102	FQ230606	NA	chr2	+	149834295	149835399_x000D_
CUST_4195_PI428311958	7.0086	P	5.53451	A	2.77809	2.77809	up	0	CUST_4195_PI428311958	0	lncRNA	NA	rn4_all_mrna_FQ231470 range=chr2:192763867-192764943 5'pad=0 3'pad=0 strand=- repeatMasking=none	seq4218	FQ231470	NA	chr2	-	192763867	192764943_x000D_
CUST_4986_PI428311958	10.7023	P	9.23049	P	2.77364	2.77364	up	0	CUST_4986_PI428311958	0	lncRNA	NA	rn4_all_mrna_S56464 range=chr4:116924268-116925724 5'pad=0 3'pad=0 strand=- repeatMasking=none	seq5020	S56464	NA	chr4	-	116924268	116925724_x000D_
CUST_3550_PI428311958	7.47407	P	6.01089	P	2.75716	2.75716	up	0	CUST_3550_PI428311958	0	lncRNA	NA	rn4_all_mrna_AF219905 range=chr1:159324119-159326377 5'pad=0 3'pad=0 strand=- repeatMasking=none	seq3565	AF219905	NA	chr1	-	159324119	159326377_x000D_
CUST_6717_PI428311958	7.68165	P	6.2187	P	2.75671	2.75671	up	0	CUST_6717_PI428311958	0	lncRNA	NA	rn4_all_mrna_FQ215740 range=chr9:112561027-112562148 5'pad=0 3'pad=0 strand=+ repeatMasking=none	seq6783	FQ215740	NA	chr9	+	112561027	112562148_x000D_
CUST_6784_PI428311958	5.71477	P	4.25248	A	2.75545	2.75545	up	0	CUST_6784_PI428311958	0	lncRNA	NA	rn4_all_mrna_FQ222388 range=chrX:34134171-34192072 5'pad=0 3'pad=0 strand=- repeatMasking=none	seq6852	FQ222388	NA	chrX	-	34134171	34192072_x000D_
CUST_1623_PI428311958	6.08383	P	4.62444	A	2.74991	2.74991	up	0	CUST_1623_PI428311958	0	lncRNA	NA	"chr1|gi|298493327|ref|NR_033744.1|| strand:- 228402167-228402221,228402053-228402142,228401982-228402049,228401924-228401980,228398661-228398749,228396547-228396643,228394504-228394595,228389221-228389283,228387959-228387993,228382558-228382604,228380879-228380965,228378285-228378329,228373034-228373087,228369952-228369995,228366603-228366604,228362840-228362911,228362673-228362738,228361234-228…	seq1629	NR_033744.1	NA	chr1	-	228359968	228402224_x000D_
CUST_1570_PI428311958	12.3534	P	10.8952	P	2.74756	2.74756	up	0	CUST_1570_PI428311958	0	lncRNA	NA	"chr20|ri|1110001L02|R000015A03|551| strand:+ 45497608-45497917,45497921-45497964,45497974-45498096,45498100-45498147,45498150-45498164,"	seq1576	R000015A03	NA	chr20	+	45497608	45498164_x000D_
CUST_3507_PI428311958	6.20217	P	4.75896	A	2.71924	2.71924	up	0	CUST_3507_PI428311958	0	lncRNA	NA	rn4_all_mrna_BC166552 range=chr1:140200356-140202034 5'pad=0 3'pad=0 strand=- repeatMasking=none	seq3521	BC166552	NA	chr1	-	140200356	140202034_x000D_
CUST_2781_PI428311958	5.59104	P	4.14944	A	2.71622	2.71622	up	0	CUST_2781_PI428311958	0	lncRNA	NA	uc.37+	seq2790	uc.37+	NA	chrUn	-	39689464	39689564_x000D_
CUST_9025_PI428311958	8.43046	P	6.98904	P	2.71587	2.71587	up	0	CUST_9025_PI428311958	0	lncRNA	NA	rn4_all_mrna_FQ231797 range=chr20:21230823-21231725 5'pad=0 3'pad=0 strand=+ repeatMasking=none	seq9124	FQ231797	NA	chr20	+	21230823	21231725_x000D_
CUST_3815_PI428311958	5.53511	P	4.09842	A	2.70698	2.70698	up	0	CUST_3815_PI428311958	0	lncRNA	NA	rn4_all_mrna_AB568258 range=chr1:263220286-263256100 5'pad=0 3'pad=0 strand=- repeatMasking=none	seq3832	AB568258	NA	chr1	-	263220286	263256100_x000D_
CUST_8185_PI428311958	6.02852	P	4.59455	A	2.70188	2.70188	up	0	CUST_8185_PI428311958	0	lncRNA	NA	rn4_all_mrna_FQ213934 range=chr15:44112648-44114118 5'pad=0 3'pad=0 strand=+ repeatMasking=none	seq8273	FQ213934	NA	chr15	+	44112648	44114118_x000D_
CUST_5062_PI428311958	6.99094	P	5.56076	P	2.69479	2.69479	up	0	CUST_5062_PI428311958	0	lncRNA	NA	rn4_all_mrna_FQ212606 range=chr4:151406584-151407851 5'pad=0 3'pad=0 strand=+ repeatMasking=none	seq5096	FQ212606	NA	chr4	+	151406584	151407851_x000D_
CUST_4231_PI428311958	6.86192	P	5.4356	P	2.68762	2.68762	up	0	CUST_4231_PI428311958	0	lncRNA	NA	rn4_all_mrna_FQ234593 range=chr2:205136292-205137499 5'pad=0 3'pad=0 strand=+ repeatMasking=none	seq4256	FQ234593	NA	chr2	+	205136292	205137499_x000D_
CUST_8264_PI428311958	7.68831	P	6.27289	P	2.66738	2.66738	up	0	CUST_8264_PI428311958	0	lncRNA	NA	rn4_all_mrna_FQ224085 range=chr16:23845533-23876508 5'pad=0 3'pad=0 strand=- repeatMasking=none	seq8354	FQ224085	NA	chr16	-	23845533	23876508_x000D_
CUST_3733_PI428311958	7.85973	P	6.44708	P	2.66226	2.66226	up	0	CUST_3733_PI428311958	0	lncRNA	NA	rn4_all_mrna_FQ224396 range=chr1:229115564-229119123 5'pad=0 3'pad=0 strand=+ repeatMasking=none	seq3750	FQ224396	NA	chr1	+	229115564	229119123_x000D_
CUST_6055_PI428311958	5.80021	P	4.39053	A	2.65678	2.65678	up	0	CUST_6055_PI428311958	0	lncRNA	NA	rn4_all_mrna_FQ226092 range=chr7:110480352-110481413 5'pad=0 3'pad=0 strand=- repeatMasking=none	seq6111	FQ226092	NA	chr7	-	110480352	110481413_x000D_
CUST_4098_PI428311958	7.14301	P	5.73518	P	2.65337	2.65337	up	0	CUST_4098_PI428311958	0	lncRNA	NA	rn4_all_mrna_BC091698 range=chr2:157214153-157215074 5'pad=0 3'pad=0 strand=+ repeatMasking=none	seq4121	BC091698	NA	chr2	+	157214153	157215074_x000D_
CUST_1022_PI428311958	9.63473	P	8.22728	P	2.65269	2.65269	up	0	CUST_1022_PI428311958	0	lncRNA	NA	"chrX|ri|3426401F11|PX00702M24|2168| strand:+ 33063722-33063729,33063751-33063956,33063966-33064102,33064115-33064160,33064161-33064282,33064288-33064310,33064311-33064354,33064356-33064443,33064444-33064448,33064449-33064692,33064702-33064725,33064734-33064813,33064938-33065267,33065277-33065330,33065337-33065342,33065344-33065610,33065616-33065752,33065753-33065767,33065769-33065794,33065796-33…	seq1025	PX00702M24	NA	chrX	+	33063722	33065866_x000D_
CUST_3934_PI428311958	6.56743	P	5.17339	A	2.62813	2.62813	up	0	CUST_3934_PI428311958	0	lncRNA	NA	rn4_all_mrna_FQ227398 range=chr2:35829629-35830736 5'pad=0 3'pad=0 strand=+ repeatMasking=none	seq3956	FQ227398	NA	chr2	+	35829629	35830736_x000D_
CUST_9399_PI428311958	13.0624	P	11.6686	P	2.62777	2.62777	up	0	CUST_9399_PI428311958	0	lncRNA	NA	"gi|293349817|ref|XR_085912.1| PREDICTED: Rattus norvegicus pseudogene for diazepam binding inhibitor 1 (LOC301444), miscRNA"	seq9500	XR_085912.1	NA	NA	NA	NA	NA_x000D_
CUST_6839_PI428311958	9.96052	P	8.56856	P	2.62436	2.62436	up	0	CUST_6839_PI428311958	0	lncRNA	NA	rn4_all_mrna_FQ231764 range=chrX:91467033-91467770 5'pad=0 3'pad=0 strand=+ repeatMasking=none	seq6908	FQ231764	NA	chrX	+	91467033	91467770_x000D_
CUST_1497_PI428311958	7.1288	P	5.73981	P	2.61896	2.61896	up	0	CUST_1497_PI428311958	0	lncRNA	NA	"chrX|gi|257153360|ref|NR_028392.1|| strand:- 40412965-40413079,40409333-40409424,40408300-40408476,40407930-40408107,40407908-40407927,40407901-40407905,40407856-40407898,40407826-40407854,40407678-40407816,40407601-40407675,40407567-40407588,40407561-40407566,40407520-40407558,40407474-40407504,40407369-40407471,40407153-40407368,40406903-40407145,40406865-40406882,40406600-40406860,40406271-40…	seq1502	NR_028392.1	NA	chrX	-	40404752	40413080_x000D_
CUST_673_PI428311958	9.19765	P	7.81469	P	2.60803	2.60803	up	0	CUST_673_PI428311958	0	lncRNA	NA	"chr15|mm9_knownGene_uc011zqo.1| strand:- 108118378-108118435,108118348-108118377,108113319-108113531,108108573-108108688,108107398-108107614,108099951-108100038,108087873-108087976,108083584-108083676,108083034-108083220,108079830-108080001,108079301-108079434,108073745-108073878,108073514-108073621,108073253-108073394,108069374-108069488,108067752-108067864,108062964-108063033,108061885-1080620…	seq676	uc011zqo.1	NA	chr15	-	108060814	108118435_x000D_
CUST_7395_PI428311958	8.23471	P	6.85456	P	2.60295	2.60295	up	0	CUST_7395_PI428311958	0	lncRNA	NA	rn4_all_mrna_FQ211854 range=chr11:32068361-32069213 5'pad=0 3'pad=0 strand=- repeatMasking=none	seq7471	FQ211854	NA	chr11	-	32068361	32069213_x000D_
CUST_4185_PI428311958	5.65142	P	4.27407	A	2.59791	2.59791	up	0	CUST_4185_PI428311958	0	lncRNA	NA	rn4_all_mrna_FQ213772 range=chr2:190653913-190655128 5'pad=0 3'pad=0 strand=+ repeatMasking=none	seq4208	FQ213772	NA	chr2	+	190653913	190655128_x000D_
CUST_519_PI428311958	16.9053	P	15.5288	P	2.5964	2.5964	up	0	CUST_519_PI428311958	0	lncRNA	NA	"chr3|gi|377833035|ref|XR_141547.1|| strand:+ 169311403-169311452,169311554-169311619,169311779-169311838,169312018-169312074,"	seq521	XR_141547.1	NA	chr3	+	169311403	169312074_x000D_
CUST_8910_PI428311958	9.17141	P	7.79716	P	2.59234	2.59234	up	0	CUST_8910_PI428311958	0	lncRNA	NA	rn4_all_mrna_FQ230829 range=chr19:41191049-41222865 5'pad=0 3'pad=0 strand=- repeatMasking=none	seq9007	FQ230829	NA	chr19	-	41191049	41222865_x000D_
CUST_4326_PI428311958	7.0047	P	5.63121	P	2.59097	2.59097	up	0	CUST_4326_PI428311958	0	lncRNA	NA	rn4_all_mrna_FQ224337 range=chr3:53215036-53310055 5'pad=0 3'pad=0 strand=- repeatMasking=none	seq4351	FQ224337	NA	chr3	-	53215036	53310055_x000D_
CUST_4004_PI428311958	7.21427	P	5.84305	P	2.58689	2.58689	up	0	CUST_4004_PI428311958	0	lncRNA	NA	rn4_all_mrna_FQ229099 range=chr2:93397687-93407496 5'pad=0 3'pad=0 strand=+ repeatMasking=none	seq4026	FQ229099	NA	chr2	+	93397687	93407496_x000D_
CUST_5250_PI428311958	6.95123	P	5.58638	P	2.5755	2.5755	up	0	CUST_5250_PI428311958	0	lncRNA	NA	rn4_all_mrna_FQ220481 range=chr5:51612222-51612812 5'pad=0 3'pad=0 strand=- repeatMasking=none	seq5293	FQ220481	NA	chr5	-	51612222	51612812_x000D_
CUST_1490_PI428311958	9.39907	P	8.04044	P	2.56441	2.56441	up	0	CUST_1490_PI428311958	0	lncRNA	NA	"chr12|mm9_knownGene_uc008zxj.2| strand:+ 22776228-22776248,22776251-22776274,22776280-22776288,22776598-22776692,22776827-22776983,22776984-22777193,22777205-22777220,22777221-22777225,"	seq1495	uc008zxj.2	NA	chr12	+	22776228	22777224_x000D_
CUST_4089_PI428311958	11.2777	P	9.9216	P	2.55999	2.55999	up	0	CUST_4089_PI428311958	0	lncRNA	NA	rn4_all_mrna_FQ226735 range=chr2:153745660-153746537 5'pad=0 3'pad=0 strand=- repeatMasking=none	seq4112	FQ226735	NA	chr2	-	153745660	153746537_x000D_
CUST_5590_PI428311958	6.85885	P	5.50328	P	2.55899	2.55899	up	0	CUST_5590_PI428311958	0	lncRNA	NA	rn4_all_mrna_FQ231423 range=chr6:21175431-21176654 5'pad=0 3'pad=0 strand=+ repeatMasking=none	seq5640	FQ231423	NA	chr6	+	21175431	21176654_x000D_
CUST_4765_PI428311958	5.48328	P	4.13034	A	2.55433	2.55433	up	0	CUST_4765_PI428311958	0	lncRNA	NA	rn4_all_mrna_FQ230459 range=chr4:33307656-33478214 5'pad=0 3'pad=0 strand=+ repeatMasking=none	seq4796	FQ230459	NA	chr4	+	33307656	33478214_x000D_
CUST_308_PI428311958	14.242	P	12.8897	P	2.55312	2.55312	up	0	CUST_308_PI428311958	0	lncRNA	NA	"chr20|gi|377833699|ref|XR_141925.1|| strand:+ 13192024-13192177,13192370-13192458,13192473-13192543,13192672-13192731,"	seq309	XR_141925.1	NA	chr20	+	13192024	13192731_x000D_
CUST_8777_PI428311958	6.2074	P	4.85777	A	2.54847	2.54847	up	0	CUST_8777_PI428311958	0	lncRNA	NA	rn4_all_mrna_FQ230309 range=chr18:60140632-60141713 5'pad=0 3'pad=0 strand=+ repeatMasking=none	seq8872	FQ230309	NA	chr18	+	60140632	60141713_x000D_
CUST_1569_PI428311958	5.85147	P	4.50352	A	2.5455	2.5455	up	0	CUST_1569_PI428311958	0	lncRNA	NA	"chr13|gi|229577200|ref|NR_027627.1|| strand:- 105517712-105517821,105517629-105517701,105513506-105513816,105476309-105476426,105435313-105435473,105431938-105432124,105419216-105419355,105377824-105378153,105377719-105377823,105377664-105377716,105377657-105377662,105377641-105377647,105377602-105377638,105377578-105377599,105377459-105377577,105377324-105377457,105377296-105377323,105377267-10…	seq1575	NR_027627.1	NA	chr13	-	105375992	105517824_x000D_
CUST_9681_PI428311958	5.82122	P	4.47465	A	2.54308	2.54308	up	0	CUST_9681_PI428311958	0	lncRNA	NA	"gi|295852007|ref|XR_009033.3| PREDICTED: Rattus norvegicus similar to N-acetyltransferase, homolog of S. cerevisiae ARD1 (LOC686785), miscRNA"	seq9782	XR_009033.3	NA	NA	NA	NA	NA_x000D_
CUST_2294_PI428311958	5.99936	P	4.65497	A	2.53921	2.53921	up	0	CUST_2294_PI428311958	0	lncRNA	NA	"chr3|mm9_knownGene_uc008mph.2| strand:- 128236336-128236524,128236250-128236334,128227919-128228108,128219307-128219374,128213576-128213644,128184343-128184463,128173426-128173496,128148166-128148273,128121457-128121576,128117143-128117208,128072149-128072259,128052018-128052126,128030741-128030815,128003026-128003170,128003000-128003025,128002996-128002999,128002949-128002994,128002892-12800294…	seq2300	uc008mph.2	NA	chr3	-	128002208	128236528_x000D_
CUST_1743_PI428311958	6.32864	P	4.9849	A	2.53809	2.53809	up	0	CUST_1743_PI428311958	0	lncRNA	NA	"chr7|mm9_knownGene_uc011zub.1| strand:+ 112633312-112633485,112634161-112634323,112634424-112634526,112635905-112636011,112636163-112636357,112636935-112637003,112637635-112637743,112640227-112640370,112640866-112640941,112641120-112641221,112642559-112642602,112656785-112656876,112662627-112662733,112665184-112665336,112665930-112665999,112667239-112667305,112673835-112674006,112675716-11267581…	seq1749	uc011zub.1	NA	chr7	+	112633312	112683384_x000D_
CUST_6168_PI428311958	5.39553	P	4.05501	A	2.53243	2.53243	up	0	CUST_6168_PI428311958	0	lncRNA	NA	rn4_all_mrna_FQ234182 range=chr8:32505270-32506286 5'pad=0 3'pad=0 strand=+ repeatMasking=none	seq6227	FQ234182	NA	chr8	+	32505270	32506286_x000D_
CUST_1719_PI428311958	10.1772	P	8.83688	P	2.5321	2.5321	up	0	CUST_1719_PI428311958	0	lncRNA	NA	"chrX|ri|A630042O03|PX00145L21|1885| strand:- 7165436-7165549,7165396-7165435,7165185-7165387,7165178-7165184,7165159-7165174,7165074-7165157,7165007-7165073,7165003-7165006,7164891-7165001,7164842-7164848,7164763-7164837,7164728-7164755,7164689-7164727,7164684-7164687,7164629-7164664,7164618-7164628,7164473-7164602,7164368-7164470,7164352-7164367,7164245-7164337,7164198-7164244,7164174-7164197,7…	seq1725	PX00145L21	NA	chrX	-	7163700	7165549_x000D_
CUST_728_PI428311958	7.43079	P	6.09156	P	2.53017	2.53017	up	0	CUST_728_PI428311958	0	lncRNA	NA	"chr18|ri|D330037H05|PX00192L09|2366| strand:- 37494815-37494831,37494699-37494814,37494679-37494697,37494640-37494677,37494626-37494636,37494602-37494622,37494536-37494582,37494501-37494533,37494473-37494499,37494462-37494472,37494405-37494452,37494368-37494404,37494294-37494367,37494256-37494287,37494188-37494249,37494007-37494165,37493911-37494002,37493831-37493899,37493779-37493830,37493761-3…	seq731	PX00192L09	NA	chr18	-	37492595	37494831_x000D_
CUST_6802_PI428311958	5.40165	P	4.06559	A	2.52461	2.52461	up	0	CUST_6802_PI428311958	0	lncRNA	NA	rn4_all_mrna_U60563 range=chrX:45765407-45773362 5'pad=0 3'pad=0 strand=+ repeatMasking=none	seq6870	U60563	NA	chrX	+	45765407	45773362_x000D_
CUST_2431_PI428311958	13.1276	P	11.7933	P	2.52141	2.52141	up	0	CUST_2431_PI428311958	0	lncRNA	NA	"chrX|mm9_knownGene_uc012hpr.1| strand:+ 36224087-36224244,36229339-36229548,36229551-36229619,36229623-36229648,36229649-36229678,36229679-36229703,36229707-36229760,36229764-36229866,36229879-36229966,36229967-36230127,36230130-36230143,36230175-36230242,36230258-36230394,36230399-36230569,36230571-36230671,36230672-36230741,36230743-36230827,36230832-36230875,36230877-36230924,36230929-3623093…	seq2439	uc012hpr.1	NA	chrX	+	36224088	36232176_x000D_
CUST_1783_PI428311958	6.45216	P	5.11926	A	2.51908	2.51908	up	0	CUST_1783_PI428311958	0	lncRNA	NA	"chr1|mm9_knownGene_uc008guo.2| strand:- 215883419-215883445,215883115-215883418,215883103-215883113,215882930-215883099,215882830-215882929,215882799-215882829,215882555-215882798,215882474-215882549,215882325-215882473,215859495-215859705,215859252-215859266,215858658-215858682,215858578-215858657,215857510-215857644,215856732-215856782,215856302-215856376,215855096-215855212,215850349-21585044…	seq1789	uc008guo.2	NA	chr1	-	215842720	215883440_x000D_
CUST_1767_PI428311958	6.82818	P	5.50174	P	2.50783	2.50783	up	0	CUST_1767_PI428311958	0	lncRNA	NA	"chr7|mm9_knownGene_uc007hos.2| strand:+ 2121248-2121367,2121371-2121447,2131895-2131994,2136144-2136187,2137280-2137335,2146482-2146549,2146762-2146765,2147008-2147038,2148835-2148860,2149421-2149478,2149503-2149516,2149526-2149585,2150721-2150789,2170949-2171038,2175699-2175761,2175767-2175790,2175791-2175819,2175898-2175906,2175911-2176080,"	seq1773	uc007hos.2	NA	chr7	+	2121248	2176080_x000D_
CUST_1387_PI428311958	8.39138	P	7.06546	P	2.50693	2.50693	up	0	CUST_1387_PI428311958	0	lncRNA	NA	"chr11|ri|9630050E20|PX00117C04|1901| strand:+ 71164768-71164846,71164862-71164865,71164866-71165087,71165094-71165357,71165361-71165523,71165524-71165711,71165713-71165819,71165821-71165952,71165955-71165989,71165992-71166010,71166016-71166074,71166077-71166129,71166130-71166157,71166158-71166164,71166168-71166179,71166181-71166215,71166217-71166241,71166259-71166276,71166287-71166386,71166396-7…	seq1391	PX00117C04	NA	chr11	+	71164768	71166640_x000D_
CUST_6834_PI428311958	6.99436	P	5.67134	P	2.50189	2.50189	up	0	CUST_6834_PI428311958	0	lncRNA	NA	rn4_all_mrna_BC098783 range=chrX:89487450-89489881 5'pad=0 3'pad=0 strand=- repeatMasking=none	seq6902	BC098783	NA	chrX	-	89487450	89489881_x000D_
CUST_8535_PI428311958	6.43229	P	5.11027	A	2.50016	2.50016	up	0	CUST_8535_PI428311958	0	lncRNA	NA	rn4_all_mrna_FQ226618 range=chr17:37778606-37786053 5'pad=0 3'pad=0 strand=- repeatMasking=none	seq8626	FQ226618	NA	chr17	-	37778606	37786053_x000D_
CUST_3522_PI428311958	5.29154	P	3.97237	A	2.49524	2.49524	up	0	CUST_3522_PI428311958	0	lncRNA	NA	rn4_all_mrna_FQ232795 range=chr1:154940696-154942370 5'pad=0 3'pad=0 strand=+ repeatMasking=none	seq3536	FQ232795	NA	chr1	+	154940696	154942370_x000D_
CUST_3251_PI428311958	6.01902	P	4.70115	A	2.49298	2.49298	up	0	CUST_3251_PI428311958	0	lncRNA	NA	rn4_all_mrna_BC105909 range=chr1:203281234-203295518 5'pad=0 3'pad=0 strand=+ repeatMasking=none	seq3263	BC105909	NA	chr1	+	203281234	203295518_x000D_
CUST_5635_PI428311958	6.21899	P	4.90383	A	2.4883	2.4883	up	0	CUST_5635_PI428311958	0	lncRNA	NA	rn4_all_mrna_FQ232979 range=chr6:43954414-43955987 5'pad=0 3'pad=0 strand=- repeatMasking=none	seq5685	FQ232979	NA	chr6	-	43954414	43955987_x000D_
CUST_2345_PI428311958	7.00958	P	5.70187	P	2.47548	2.47548	up	0	CUST_2345_PI428311958	0	lncRNA	NA	"chr20|ri|A430076P17|PX00137F02|1199| strand:+ 43695767-43695813,43695814-43695878,43695882-43695935,43695936-43696002,43696005-43696022,43696023-43696105,43696108-43696202,43696231-43696300,43696312-43696336,43696355-43696405,43696417-43696448,43696451-43696509,43696520-43696615,43696623-43696642,43696644-43696774,43696775-43696985,"	seq2352	PX00137F02	NA	chr20	+	43695768	43696984_x000D_
CUST_2742_PI428311958	7.00997	P	5.70347	P	2.47341	2.47341	up	0	CUST_2742_PI428311958	0	lncRNA	NA	"chr10|mm9_knownGene_uc011xwt.1| strand:+ 55785761-55785849,55785967-55786117,55786555-55786632,"	seq2751	uc011xwt.1	NA	chr10	+	55785760	55786632_x000D_
CUST_8604_PI428311958	9.50779	P	8.20284	P	2.47075	2.47075	up	0	CUST_8604_PI428311958	0	lncRNA	NA	rn4_all_mrna_FQ220024 range=chr17:72555576-72556281 5'pad=0 3'pad=0 strand=- repeatMasking=none	seq8696	FQ220024	NA	chr17	-	72555576	72556281_x000D_
CUST_6653_PI428311958	6.07881	P	4.77784	A	2.46395	2.46395	up	0	CUST_6653_PI428311958	0	lncRNA	NA	rn4_all_mrna_FQ231389 range=chr9:78099430-78100482 5'pad=0 3'pad=0 strand=+ repeatMasking=none	seq6719	FQ231389	NA	chr9	+	78099430	78100482_x000D_
CUST_2058_PI428311958	6.17497	P	4.8792	A	2.45508	2.45508	up	0	CUST_2058_PI428311958	0	lncRNA	NA	"chr10|mm9_knownGene_uc007jqw.1| strand:- 56480182-56480211,56480161-56480172,56480047-56480160,56476162-56476225,56475921-56476051,56475503-56475517,56475396-56475501,56475181-56475299,56474919-56475029,56474669-56474798,56474650-56474667,56474586-56474628,56474537-56474569,56474531-56474536,56474515-56474530,56474484-56474505,56474450-56474458,56474424-56474449,56474341-56474415,56474313-564743…	seq2064	uc007jqw.1	NA	chr10	-	56474196	56480212_x000D_
CUST_2611_PI428311958	8.5787	P	7.28385	P	2.45351	2.45351	up	0	CUST_2611_PI428311958	0	lncRNA	NA	"chr10|mm9_knownGene_uc007kii.1| strand:- 64458800-64458806,64458666-64458792,64458661-64458665,64458553-64458580,64458518-64458547,64458484-64458508,64458317-64458467,64458286-64458314,64458142-64458243,64458130-64458141,64458095-64458123,64458064-64458089,64458001-64458051,64457958-64457991,64457935-64457940,64457928-64457934,64457913-64457925,64457803-64457912,64457728-64457760,64457691-644577…	seq2620	uc007kii.1	NA	chr10	-	64455068	64458808_x000D_
CUST_6931_PI428311958	5.36421	P	4.08033	A	2.43493	2.43493	up	0	CUST_6931_PI428311958	0	lncRNA	NA	rn4_all_mrna_FQ230509 range=chr10:4315779-4316852 5'pad=0 3'pad=0 strand=- repeatMasking=none	seq7003	FQ230509	NA	chr10	-	4315779	4316852_x000D_
CUST_6336_PI428311958	5.94594	P	4.6651	A	2.4298	2.4298	up	0	CUST_6336_PI428311958	0	lncRNA	NA	rn4_all_mrna_FQ211763 range=chr8:71333554-71334929 5'pad=0 3'pad=0 strand=+ repeatMasking=none	seq6399	FQ211763	NA	chr8	+	71333554	71334929_x000D_
CUST_9756_PI428311958	5.26004	P	3.98031	A	2.42794	2.42794	up	0	CUST_9756_PI428311958	0	lncRNA	NA	"gi|295852351|ref|XR_086187.2| PREDICTED: Rattus norvegicus GIPC PDZ domain containing family, member 2 (LOC100361187), miscRNA"	seq9857	XR_086187.2	NA	NA	NA	NA	NA_x000D_
CUST_2310_PI428311958	6.30055	P	5.02237	A	2.42533	2.42533	up	0	CUST_2310_PI428311958	0	lncRNA	NA	"chr12|ri|2410055N02|ZX00080E20|1215| strand:+ 1502330-1502378,1502381-1502405,1502406-1502427,1502429-1502470,1502474-1502560,1502561-1502578,1502580-1502589,1502593-1502716,1502717-1502951,1502953-1503065,1503066-1503101,1503102-1503147,1503148-1503343,1503345-1503366,"	seq2316	ZX00080E20	NA	chr12	+	1502330	1503366_x000D_
CUST_6752_PI428311958	8.06133	P	6.78535	P	2.42164	2.42164	up	0	CUST_6752_PI428311958	0	lncRNA	NA	rn4_all_mrna_FQ233450 range=chrX:3007325-3008292 5'pad=0 3'pad=0 strand=- repeatMasking=none	seq6820	FQ233450	NA	chrX	-	3007325	3008292_x000D_
CUST_2386_PI428311958	7.64429	P	6.36944	P	2.41975	2.41975	up	0	CUST_2386_PI428311958	0	lncRNA	NA	"chr14|mm9_knownGene_uc008xbl.2| strand:- 82579596-82580221,82577164-82577326,82570453-82570619,82569382-82569864,82563240-82563384,82556163-82556247,82554945-82555069,82552225-82552452,82544785-82544916,82543861-82543984,82542860-82543060,82541901-82542080,82541386-82541542,82541053-82541258,82539445-82539548,82538858-82539126,82537202-82537318,82533377-82533518,82533008-82533114,82531252-825314…	seq2394	uc008xbl.2	NA	chr14	-	82527112	82580224_x000D_
CUST_9703_PI428311958	5.16936	P	3.89796	A	2.41395	2.41395	up	0	CUST_9703_PI428311958	0	lncRNA	NA	"gi|295852088|ref|XR_006619.3| PREDICTED: Rattus norvegicus similar to frizzled 10 (LOC363913), miscRNA"	seq9804	XR_006619.3	NA	NA	NA	NA	NA_x000D_
CUST_2040_PI428311958	7.45604	P	6.18877	P	2.40706	2.40706	up	0	CUST_2040_PI428311958	0	lncRNA	NA	"chr8|mm9_knownGene_uc012gog.1| strand:- 10627726-10627977,10622353-10622509,10620181-10620360,10619623-10619744,10618213-10618329,10617567-10617640,10614985-10615097,10614207-10614284,10613185-10613191,10610365-10610502,10609313-10609342,10609100-10609312,10609061-10609099,10609000-10609059,10608960-10608999,10608928-10608957,10608843-10608921,10608770-10608841,10608640-10608768,10608578-1060862…	seq2046	uc012gog.1	NA	chr8	-	10608264	10627977_x000D_
CUST_480_PI428311958	11.4951	P	10.229	P	2.40517	2.40517	up	0	CUST_480_PI428311958	0	lncRNA	NA	"chr1|mm9_knownGene_uc009gbm.1| strand:- 84416262-84416358,84416240-84416261,84416148-84416239,84416063-84416147,84415909-84416061,84397581-84397607,84397232-84397305,84396564-84396617,84395782-84395943,"	seq482	uc009gbm.1	NA	chr1	-	84395782	84416358_x000D_
CUST_5388_PI428311958	9.37422	P	8.11069	P	2.40083	2.40083	up	0	CUST_5388_PI428311958	0	lncRNA	NA	rn4_all_mrna_FQ232522 range=chr5:136826939-136827399 5'pad=0 3'pad=0 strand=+ repeatMasking=none	seq5433	FQ232522	NA	chr5	+	136826939	136827399_x000D_
CUST_2276_PI428311958	6.72509	P	5.46204	P	2.40002	2.40002	up	0	CUST_2276_PI428311958	0	lncRNA	NA	"chr18|mm9_knownGene_uc008ews.1| strand:- 45085420-45085524,45085201-45085419,45083543-45083570,45083439-45083536,45083419-45083438,45074215-45074225,45074189-45074214,45073942-45074014,45073938-45073941,45073883-45073937,"	seq2282	uc008ews.1	NA	chr18	-	45073884	45085524_x000D_
CUST_5330_PI428311958	7.76081	P	6.50085	P	2.39489	2.39489	up	0	CUST_5330_PI428311958	0	lncRNA	NA	rn4_all_mrna_FQ230418 range=chr5:118158241-118159067 5'pad=0 3'pad=0 strand=+ repeatMasking=none	seq5375	FQ230418	NA	chr5	+	118158241	118159067_x000D_
CUST_3864_PI428311958	9.33313	P	8.07362	P	2.39413	2.39413	up	0	CUST_3864_PI428311958	0	lncRNA	NA	rn4_all_mrna_BC168946 range=chr2:220020979-220096808 5'pad=0 3'pad=0 strand=+ repeatMasking=none	seq3884	BC168946	NA	chr2	+	220020979	220096808_x000D_
CUST_3301_PI428311958	8.13961	P	6.88028	P	2.39385	2.39385	up	0	CUST_3301_PI428311958	0	lncRNA	NA	rn4_all_mrna_FQ215151 range=chr1:27719392-27729255 5'pad=0 3'pad=0 strand=+ repeatMasking=none	seq3313	FQ215151	NA	chr1	+	27719392	27729255_x000D_
CUST_2029_PI428311958	9.34631	P	8.08699	P	2.39383	2.39383	up	0	CUST_2029_PI428311958	0	lncRNA	NA	"chr2|mm9_knownGene_uc012cxb.1| strand:+ 219995540-219995566,219995573-219995669,220007654-220007802,220011558-220011833,220012106-220012238,220017405-220017516,220020921-220021038,220046143-220046278,220047284-220047286,220048706-220048823,220055049-220055173,220060711-220060953,220061032-220061047,220061495-220061589,220075804-220075920,220076547-220076713,220079453-220079540,220079660-22007980…	seq2035	uc012cxb.1	NA	chr2	+	219995536	220096800_x000D_
CUST_267_PI428311958	6.96716	P	5.71093	P	2.3887	2.3887	up	0	CUST_267_PI428311958	0	lncRNA	NA	"chr6|gi|256773276|ref|NR_028341.1|| strand:+ 42128908-42129007,42142269-42142356,42146982-42147077,42154090-42154240,42155000-42155004,42156588-42156733,42164455-42164548,42165678-42165681,42190282-42190431,42192898-42193073,42193763-42193786,42195681-42195761,42201889-42201960,42202474-42202696,42204063-42204250,42204254-42204258,42204342-42204396,42204407-42204423,42204431-42204451,"	seq268	NR_028341.1	NA	chr6	+	42128908	42204452_x000D_
CUST_4445_PI428311958	7.19341	P	5.93724	P	2.3886	2.3886	up	0	CUST_4445_PI428311958	0	lncRNA	NA	rn4_all_mrna_FQ223322 range=chr3:33904897-33906015 5'pad=0 3'pad=0 strand=- repeatMasking=none	seq4472	FQ223322	NA	chr3	-	33904897	33906015_x000D_
CUST_8641_PI428311958	5.35265	P	4.09763	A	2.3867	2.3867	up	0	CUST_8641_PI428311958	0	lncRNA	NA	rn4_all_mrna_FQ227217 range=chr17:92494217-92495041 5'pad=0 3'pad=0 strand=- repeatMasking=none	seq8733	FQ227217	NA	chr17	-	92494217	92495041_x000D_
CUST_8150_PI428311958	5.86896	P	4.61782	A	2.3803	2.3803	up	0	CUST_8150_PI428311958	0	lncRNA	NA	rn4_all_mrna_FQ219924 range=chr15:34199241-34201133 5'pad=0 3'pad=0 strand=+ repeatMasking=none	seq8236	FQ219924	NA	chr15	+	34199241	34201133_x000D_
CUST_352_PI428311958	8.43922	P	7.18809	P	2.38027	2.38027	up	0	CUST_352_PI428311958	0	lncRNA	NA	"chr5|gi|377833976|ref|XR_107624.2|| strand:- 139718945-139719024,139718840-139718942,139718682-139718839,139718646-139718677,139718398-139718645,"	seq354	XR_107624.2	NA	chr5	-	139718398	139719024_x000D_
CUST_2074_PI428311958	6.48659	P	5.23566	A	2.37995	2.37995	up	0	CUST_2074_PI428311958	0	lncRNA	NA	"chr20|mm9_knownGene_uc011xes.1| strand:- 28631743-28632025,28629980-28630142,28629750-28629974,28606671-28606824,28602592-28602761,28588173-28588256,28587626-28587771,28585137-28585243,28583395-28583529,28583362-28583369,28582293-28582426,28581081-28581188,28578969-28579117,28575408-28575583,28571789-28571916,28571642-28571644,28571368-28571466,28571265-28571289,28570240-28570297,28564991-285651…	seq2080	uc011xes.1	NA	chr20	-	28554364	28632024_x000D_
CUST_9088_PI428311958	6.11418	P	4.86442	A	2.37801	2.37801	up	0	CUST_9088_PI428311958	0	lncRNA	NA	rn4_all_mrna_BC166999 range=chr20:54907440-54912705 5'pad=0 3'pad=0 strand=+ repeatMasking=none	seq9187	BC166999	NA	chr20	+	54907440	54912705_x000D_
CUST_944_PI428311958	8.27368	P	7.02738	P	2.37233	2.37233	up	0	CUST_944_PI428311958	0	lncRNA	NA	"chrX|ri|A230081H08|PX00130K04|942| strand:- 92070891-92070977,92070534-92070890,92070386-92070533,92070046-92070385,"	seq947	PX00130K04	NA	chrX	-	92070046	92070977_x000D_
CUST_8713_PI428311958	5.87651	P	4.63099	A	2.37105	2.37105	up	0	CUST_8713_PI428311958	0	lncRNA	NA	rn4_all_mrna_FQ219321 range=chr18:28237446-28238626 5'pad=0 3'pad=0 strand=- repeatMasking=none	seq8808	FQ219321	NA	chr18	-	28237446	28238626_x000D_
CUST_1583_PI428311958	6.17651	P	4.93275	A	2.36815	2.36815	up	0	CUST_1583_PI428311958	0	lncRNA	NA	"chr13|mm9_knownGene_uc011wyu.1| strand:- 107640761-107640946,107636277-107636400,107635533-107635632,107634535-107634596,107634330-107634450,107629620-107629685,107628099-107628211,107624614-107624687,107623333-107623436,107622989-107623091,107619025-107619138,107614917-107615006,107611856-107611923,107611788-107611852,107605654-107605703,107604894-107605653,107604829-107604887,107604705-1076047…	seq1589	uc011wyu.1	NA	chr13	-	107601824	107640944_x000D_
CUST_1389_PI428311958	6.57932	P	5.33663	A	2.36639	2.36639	up	0	CUST_1389_PI428311958	0	lncRNA	NA	"chrX|gi|377834674|ref|XR_142429.1|| strand:+ 123442435-123442501,123442502-123442538,123443185-123443243,123443245-123443248,123443249-123443463,123443509-123443547,"	seq1393	XR_142429.1	NA	chrX	+	123442432	123443544_x000D_
CUST_6729_PI428311958	5.19373	P	3.95114	A	2.36622	2.36622	up	0	CUST_6729_PI428311958	0	lncRNA	NA	rn4_all_mrna_FQ214145 range=chrM:6919-8051 5'pad=0 3'pad=0 strand=- repeatMasking=none	seq6795	FQ214145	NA	chrM	-	6919	8051_x000D_
CUST_8452_PI428311958	9.5128	P	8.27043	P	2.36586	2.36586	up	0	CUST_8452_PI428311958	0	lncRNA	NA	rn4_all_mrna_AY387076 range=chr17:5740384-5760584 5'pad=0 3'pad=0 strand=+ repeatMasking=none	seq8543	AY387076	NA	chr17	+	5740384	5760584_x000D_
CUST_4113_PI428311958	7.17639	P	5.93656	P	2.36171	2.36171	up	0	CUST_4113_PI428311958	0	lncRNA	NA	rn4_all_mrna_FQ221228 range=chr2:171248815-171260506 5'pad=0 3'pad=0 strand=- repeatMasking=none	seq4136	FQ221228	NA	chr2	-	171248815	171260506_x000D_
CUST_7076_PI428311958	9.0564	P	7.81708	P	2.36088	2.36088	up	0	CUST_7076_PI428311958	0	lncRNA	NA	rn4_all_mrna_AF239157 range=chr10:46291403-46293136 5'pad=0 3'pad=0 strand=- repeatMasking=none	seq7149	AF239157	NA	chr10	-	46291403	46293136_x000D_
CUST_8405_PI428311958	7.19143	P	5.95884	P	2.34988	2.34988	up	0	CUST_8405_PI428311958	0	lncRNA	NA	rn4_all_mrna_FQ230045 range=chr16:80534917-80536131 5'pad=0 3'pad=0 strand=- repeatMasking=none	seq8496	FQ230045	NA	chr16	-	80534917	80536131_x000D_
CUST_5160_PI428311958	6.27414	P	5.04409	A	2.34575	2.34575	up	0	CUST_5160_PI428311958	0	lncRNA	NA	rn4_all_mrna_BC129089 range=chr5:107069131-107088371 5'pad=0 3'pad=0 strand=- repeatMasking=none	seq5200	BC129089	NA	chr5	-	107069131	107088371_x000D_
CUST_8661_PI428311958	8.5209	P	7.29366	P	2.34118	2.34118	up	0	CUST_8661_PI428311958	0	lncRNA	NA	rn4_all_mrna_BC078941 range=chr18:73909300-73949157 5'pad=0 3'pad=0 strand=+ repeatMasking=none	seq8754	BC078941	NA	chr18	+	73909300	73949157_x000D_
CUST_4087_PI428311958	6.9951	P	5.76828	P	2.34051	2.34051	up	0	CUST_4087_PI428311958	0	lncRNA	NA	rn4_all_mrna_FQ224409 range=chr2:150460328-150466536 5'pad=0 3'pad=0 strand=+ repeatMasking=none	seq4110	FQ224409	NA	chr2	+	150460328	150466536_x000D_
CUST_58_PI428311958	10.4473	P	9.22104	P	2.33963	2.33963	up	0	CUST_58_PI428311958	0	lncRNA	NA	"chr7|gi|377835718|ref|XR_141006.1|| strand:- 1369032-1369085,1369021-1369030,1369005-1369018,1368984-1369004,1368958-1368983,1368942-1368957,1368935-1368939,1368921-1368934,1368738-1368920,1368718-1368737,1368469-1368717,1368313-1368468,1368231-1368285,1368122-1368228,1368110-1368121,"	seq58	XR_141006.1	NA	chr7	-	1368110	1369085_x000D_
CUST_3765_PI428311958	7.43118	P	6.20758	P	2.33529	2.33529	up	0	CUST_3765_PI428311958	0	lncRNA	NA	rn4_all_mrna_FQ232210 range=chr1:241477819-241478884 5'pad=0 3'pad=0 strand=+ repeatMasking=none	seq3782	FQ232210	NA	chr1	+	241477819	241478884_x000D_
CUST_7798_PI428311958	7.00433	P	5.78106	P	2.33474	2.33474	up	0	CUST_7798_PI428311958	0	lncRNA	NA	rn4_all_mrna_FQ231892 range=chr13:89534621-89536208 5'pad=0 3'pad=0 strand=- repeatMasking=none	seq7876	FQ231892	NA	chr13	-	89534621	89536208_x000D_
CUST_7995_PI428311958	7.10159	P	5.88141	P	2.32976	2.32976	up	0	CUST_7995_PI428311958	0	lncRNA	NA	rn4_all_mrna_FQ212907 range=chr14:97100884-97102078 5'pad=0 3'pad=0 strand=+ repeatMasking=none	seq8078	FQ212907	NA	chr14	+	97100884	97102078_x000D_
CUST_4177_PI428311958	6.62401	P	5.40504	A	2.32781	2.32781	up	0	CUST_4177_PI428311958	0	lncRNA	NA	rn4_all_mrna_FQ225167 range=chr2:190193218-190194474 5'pad=0 3'pad=0 strand=- repeatMasking=none	seq4200	FQ225167	NA	chr2	-	190193218	190194474_x000D_
CUST_9540_PI428311958	5.99792	P	4.77944	A	2.32702	2.32702	up	0	CUST_9540_PI428311958	0	lncRNA	NA	"gi|295851631|ref|XR_085605.2| PREDICTED: Rattus norvegicus transcription factor ELYS-like (LOC100365024), miscRNA"	seq9641	XR_085605.2	NA	NA	NA	NA	NA_x000D_
CUST_5952_PI428311958	7.82806	P	6.61163	P	2.32372	2.32372	up	0	CUST_5952_PI428311958	0	lncRNA	NA	rn4_all_mrna_FQ211235 range=chr7:32604614-32604870 5'pad=0 3'pad=0 strand=- repeatMasking=none	seq6007	FQ211235	NA	chr7	-	32604614	32604870_x000D_
CUST_8716_PI428311958	7.56082	P	6.34459	P	2.32339	2.32339	up	0	CUST_8716_PI428311958	0	lncRNA	NA	rn4_all_mrna_FQ228491 range=chr18:28927418-28927685 5'pad=0 3'pad=0 strand=+ repeatMasking=none	seq8811	FQ228491	NA	chr18	+	28927418	28927685_x000D_
CUST_8190_PI428311958	7.86551	P	6.64987	P	2.32243	2.32243	up	0	CUST_8190_PI428311958	0	lncRNA	NA	rn4_all_mrna_FQ214417 range=chr15:44518765-44519732 5'pad=0 3'pad=0 strand=- repeatMasking=none	seq8278	FQ214417	NA	chr15	-	44518765	44519732_x000D_
CUST_6788_PI428311958	7.72285	P	6.50894	P	2.31966	2.31966	up	0	CUST_6788_PI428311958	0	lncRNA	NA	rn4_all_mrna_FQ231330 range=chrX:38352058-38352902 5'pad=0 3'pad=0 strand=- repeatMasking=none	seq6856	FQ231330	NA	chrX	-	38352058	38352902_x000D_
CUST_2167_PI428311958	6.00328	P	4.79031	A	2.31815	2.31815	up	0	CUST_2167_PI428311958	0	lncRNA	NA	"chr7|gi|356640147|ref|NR_045510.1|| strand:+ 126013296-126013428,126018963-126019090,126054921-126055428,126055432-126055999,126056000-126056220,126056223-126056288,126056291-126056355,126056363-126056428,126056433-126056527,126056539-126056597,126056599-126056668,126056678-126056706,126056707-126056710,126056719-126056754,126056755-126056791,126056802-126056829,126056840-126056870,126056871-126…	seq2173	NR_045510.1	NA	chr7	+	126013296	126057008_x000D_
CUST_6870_PI428311958	10.5555	P	9.34435	P	2.3153	2.3153	up	0	CUST_6870_PI428311958	0	lncRNA	NA	rn4_all_mrna_BC158584 range=chrX:128790728-128791593 5'pad=0 3'pad=0 strand=+ repeatMasking=none	seq6940	BC158584	NA	chrX	+	128790728	128791593_x000D_
CUST_3981_PI428311958	8.28436	P	7.07333	P	2.31504	2.31504	up	0	CUST_3981_PI428311958	0	lncRNA	NA	rn4_all_mrna_BC089934 range=chr2:61825743-61827011 5'pad=0 3'pad=0 strand=- repeatMasking=none	seq4003	BC089934	NA	chr2	-	61825743	61827011_x000D_
CUST_6779_PI428311958	11.9949	P	10.7839	P	2.31503	2.31503	up	0	CUST_6779_PI428311958	0	lncRNA	NA	rn4_all_mrna_FQ232116 range=chrX:27414588-27415637 5'pad=0 3'pad=0 strand=+ repeatMasking=none	seq6847	FQ232116	NA	chrX	+	27414588	27415637_x000D_
CUST_3630_PI428311958	5.5949	P	4.38409	A	2.31469	2.31469	up	0	CUST_3630_PI428311958	0	lncRNA	NA	rn4_all_mrna_FQ227751 range=chr1:190968040-190968923 5'pad=0 3'pad=0 strand=- repeatMasking=none	seq3646	FQ227751	NA	chr1	-	190968040	190968923_x000D_
CUST_9344_PI428311958	9.21575	P	8.00674	P	2.31179	2.31179	up	0	CUST_9344_PI428311958	0	lncRNA	NA	"gi|293346997|ref|XR_085822.1| PREDICTED: Rattus norvegicus hypothetical protein LOC680899 (LOC680899), miscRNA"	seq9445	XR_085822.1	NA	NA	NA	NA	NA_x000D_
CUST_6542_PI428311958	7.5502	P	6.34215	P	2.31024	2.31024	up	0	CUST_6542_PI428311958	0	lncRNA	NA	rn4_all_mrna_BC099800 range=chr9:10054005-10078475 5'pad=0 3'pad=0 strand=- repeatMasking=none	seq6606	BC099800	NA	chr9	-	10054005	10078475_x000D_
CUST_7802_PI428311958	5.82522	P	4.61917	A	2.30706	2.30706	up	0	CUST_7802_PI428311958	0	lncRNA	NA	rn4_all_mrna_FQ230439 range=chr13:89710124-89711259 5'pad=0 3'pad=0 strand=- repeatMasking=none	seq7880	FQ230439	NA	chr13	-	89710124	89711259_x000D_
CUST_2257_PI428311958	9.28227	P	8.07675	P	2.3062	2.3062	up	0	CUST_2257_PI428311958	0	lncRNA	NA	"chr3|mm9_knownGene_uc008ojd.1| strand:+ 169528510-169529191,169529199-169529210,169529217-169529401,169530339-169530430,169530924-169531026,169531757-169531878,169532293-169532353,169532357-169532395,169535872-169536026,169536780-169536957,169537129-169537298,169537834-169537896,169538236-169538386,169538400-169538403,169538817-169539094,169539104-169539122,169539133-169539203,169539253-16953932…	seq2263	uc008ojd.1	NA	chr3	+	169528512	169539584_x000D_
CUST_3561_PI428311958	6.83042	P	5.6259	P	2.30461	2.30461	up	0	CUST_3561_PI428311958	0	lncRNA	NA	rn4_all_mrna_FQ210619 range=chr1:163369740-163371031 5'pad=0 3'pad=0 strand=+ repeatMasking=none	seq3576	FQ210619	NA	chr1	+	163369740	163371031_x000D_
CUST_1271_PI428311958	9.22083	P	8.0165	P	2.30431	2.30431	up	0	CUST_1271_PI428311958	0	lncRNA	NA	"chr10|gi|326807010|ref|NR_038057.1|| strand:+ 72806682-72806770,72815468-72815493,72815500-72815643,72816108-72816209,72816608-72816681,72816682-72816715,72816761-72816861,"	seq1275	NR_038057.1	NA	chr10	+	72806680	72816864_x000D_
CUST_9562_PI428311958	6.36221	P	5.15825	A	2.30371	2.30371	up	0	CUST_9562_PI428311958	0	lncRNA	NA	"gi|295851688|ref|XR_085657.2| PREDICTED: Rattus norvegicus extracellular matrix protein 2-like (LOC100365207), miscRNA"	seq9663	XR_085657.2	NA	NA	NA	NA	NA_x000D_
CUST_1515_PI428311958	13.7672	P	12.5635	P	2.30319	2.30319	up	0	CUST_1515_PI428311958	0	lncRNA	NA	"chr2|gi|295390087|ref|NR_033590.1|| strand:- 193176737-193176760,193176715-193176735,193176685-193176713,193170520-193170643,193166239-193166296,193166042-193166140,193155408-193155535,193154818-193154969,193153759-193153907,193151156-193151206,193151081-193151148,193150025-193150157,193149096-193149107,193149090-193149094,193148902-193149089,193147973-193148169,193147950-193147972,193147943-193…	seq1520	NR_033590.1	NA	chr2	-	193147936	193176768_x000D_
CUST_7590_PI428311958	7.94832	P	6.74612	P	2.30091	2.30091	up	0	CUST_7590_PI428311958	0	lncRNA	NA	rn4_all_mrna_FQ232373 range=chr12:32266883-32268213 5'pad=0 3'pad=0 strand=- repeatMasking=none	seq7666	FQ232373	NA	chr12	-	32266883	32268213_x000D_
CUST_1448_PI428311958	9.31751	P	8.11903	P	2.29498	2.29498	up	0	CUST_1448_PI428311958	0	lncRNA	NA	"chr4|mm9_knownGene_uc012cps.1| strand:- 149647567-149647612,149646204-149646214,149646199-149646202,149646167-149646197,149644757-149644831,149644692-149644746,149644282-149644288,149644158-149644275,149639970-149640029,149639896-149639968,149639490-149639566,149639442-149639488,149638685-149638824,149637335-149637444,"	seq1453	uc012cps.1	NA	chr4	-	149637328	149647616_x000D_
CUST_2725_PI428311958	10.1014	P	8.90434	P	2.29265	2.29265	up	0	CUST_2725_PI428311958	0	lncRNA	NA	"chr4|ri|6330527D06|PX00647G02|2278| strand:+ 85709601-85709751,85709758-85709770,85709774-85709877,85709884-85709938,85709939-85710006,85710007-85710106,85710132-85710166,85710180-85710191,85710194-85710230,85710231-85710432,85710433-85710437,85710463-85710484,85710487-85710542,85710544-85710598,85710607-85710733,85710736-85710771,85710773-85710847,85710854-85710867,85710868-85710896,85710898-85…	seq2734	PX00647G02	NA	chr4	+	85709600	85711880_x000D_
CUST_6145_PI428311958	7.89225	P	6.69637	P	2.29084	2.29084	up	0	CUST_6145_PI428311958	0	lncRNA	NA	rn4_all_mrna_FQ234988 range=chr7:138365815-138366593 5'pad=0 3'pad=0 strand=- repeatMasking=none	seq6202	FQ234988	NA	chr7	-	138365815	138366593_x000D_
CUST_9296_PI428311958	9.66126	P	8.47382	P	2.27747	2.27747	up	0	CUST_9296_PI428311958	0	lncRNA	NA	"gi|293345352|ref|XR_085753.1| PREDICTED: Rattus norvegicus similar to neurobeachin (RGD1562629), miscRNA"	seq9397	XR_085753.1	NA	NA	NA	NA	NA_x000D_
CUST_9524_PI428311958	7.04799	P	5.86488	P	2.27065	2.27065	up	0	CUST_9524_PI428311958	0	lncRNA	NA	"gi|295851583|ref|XR_009483.3| PREDICTED: Rattus norvegicus similar to CLM3 (LOC363715), miscRNA"	seq9625	XR_009483.3	NA	NA	NA	NA	NA_x000D_
CUST_9651_PI428311958	5.96856	P	4.79076	A	2.26231	2.26231	up	0	CUST_9651_PI428311958	0	lncRNA	NA	"gi|295851931|ref|XR_009018.3| PREDICTED: Rattus norvegicus similar to Tle6 protein (RGD1561530), miscRNA"	seq9752	XR_009018.3	NA	NA	NA	NA	NA_x000D_
CUST_8883_PI428311958	6.64131	P	5.46517	P	2.25971	2.25971	up	0	CUST_8883_PI428311958	0	lncRNA	NA	rn4_all_mrna_FQ231932 range=chr19:35920917-35922300 5'pad=0 3'pad=0 strand=+ repeatMasking=none	seq8979	FQ231932	NA	chr19	+	35920917	35922300_x000D_
CUST_1339_PI428311958	5.64687	P	4.47348	A	2.25542	2.25542	up	0	CUST_1339_PI428311958	0	lncRNA	NA	"chr1|mm9_knownGene_uc012fig.1| strand:- 87832867-87833003,87831668-87831753,87830620-87830771,87829618-87829711,87828527-87828587,87826127-87826369,87824587-87824734,87822234-87822313,87818919-87818928,87818679-87818856,87817596-87817751,87817591-87817594,87817455-87817590,87815931-87816109,87814022-87814139,87812268-87812405,87811793-87811954,87806961-87807165,87804615-87804723,87803832-8780392…	seq1343	uc012fig.1	NA	chr1	-	87793208	87833000_x000D_
CUST_729_PI428311958	8.10841	P	6.93503	P	2.2554	2.2554	up	0	CUST_729_PI428311958	0	lncRNA	NA	"chr5|gi|299117633|ref|NR_033793.1|| strand:+ 132955337-132955731,132971224-132971357,132973283-132973747,132988542-132988689,132994139-132994354,133000830-133001024,133001025-133001099,133001100-133001137,133001151-133001243,133001245-133001387,"	seq732	NR_033793.1	NA	chr5	+	132955337	133001387_x000D_
CUST_8727_PI428311958	5.33749	P	4.1677	A	2.24981	2.24981	up	0	CUST_8727_PI428311958	0	lncRNA	NA	rn4_all_mrna_AY539884 range=chr18:29447714-29464441 5'pad=0 3'pad=0 strand=+ repeatMasking=none	seq8822	AY539884	NA	chr18	+	29447714	29464441_x000D_
CUST_9437_PI428311958	5.76034	P	4.59085	A	2.24932	2.24932	up	0	CUST_9437_PI428311958	0	lncRNA	NA	"gi|293354131|ref|XR_086041.1| PREDICTED: Rattus norvegicus similar to RIKEN cDNA 3110001I22 (RGD1565661), miscRNA"	seq9538	XR_086041.1	NA	NA	NA	NA	NA_x000D_
CUST_1786_PI428311958	7.03594	P	5.86752	P	2.24766	2.24766	up	0	CUST_1786_PI428311958	0	lncRNA	NA	"chr1|mm9_knownGene_uc009iyv.1| strand:+ 163369737-163369834,163369924-163370019,163370189-163370321,163370805-163370810,163370814-163371029,"	seq1792	uc009iyv.1	NA	chr1	+	163369744	163371024_x000D_
CUST_2678_PI428311958	13.2082	P	12.0446	P	2.24015	2.24015	up	0	CUST_2678_PI428311958	0	lncRNA	NA	"chr10|mm9_knownGene_uc007jnt.1| strand:+ 55254660-55254672,55254678-55254740,55254747-55254836,55254951-55254959,55269984-55270044,55270050-55270077,55275542-55275625,55276258-55276349,55277012-55277081,55277252-55277256,55278419-55278545,55278716-55278786,55279917-55280099,55281435-55281588,55282483-55282570,55283556-55283970,55284283-55284373,55286038-55286150,55289714-55289874,55293334-552934…	seq2687	uc007jnt.1	NA	chr10	+	55254660	55304144_x000D_
CUST_8855_PI428311958	8.76216	P	7.60127	P	2.23595	2.23595	up	0	CUST_8855_PI428311958	0	lncRNA	NA	rn4_all_mrna_FQ213836 range=chr19:22871488-22872810 5'pad=0 3'pad=0 strand=+ repeatMasking=none	seq8951	FQ213836	NA	chr19	+	22871488	22872810_x000D_
CUST_4627_PI428311958	5.12762	P	3.96776	A	2.23436	2.23436	up	0	CUST_4627_PI428311958	0	lncRNA	NA	rn4_all_mrna_FQ232124 range=chr3:137650916-137651844 5'pad=0 3'pad=0 strand=- repeatMasking=none	seq4655	FQ232124	NA	chr3	-	137650916	137651844_x000D_
CUST_809_PI428311958	5.85379	P	4.70033	A	2.22446	2.22446	up	0	CUST_809_PI428311958	0	lncRNA	NA	"chr10|ri|A730004B16|PX00148E06|2141| strand:- 74496118-74496277,74496053-74496117,74495762-74496052,74495403-74495760,74495384-74495402,74495264-74495362,74495248-74495255,74495240-74495243,74495226-74495239,74495204-74495223,74495158-74495179,74495109-74495157,74495042-74495106,74494948-74495040,74494881-74494944,74494860-74494879,74494794-74494858,74494655-74494793,74494606-74494614,74494433-7…	seq812	PX00148E06	NA	chr10	-	74494236	74496277_x000D_
CUST_8915_PI428311958	6.77155	P	5.62046	P	2.22082	2.22082	up	0	CUST_8915_PI428311958	0	lncRNA	NA	rn4_all_mrna_BC089891 range=chr19:41852796-41873927 5'pad=0 3'pad=0 strand=- repeatMasking=none	seq9012	BC089891	NA	chr19	-	41852796	41873927_x000D_
CUST_1284_PI428311958	6.32002	P	5.16898	A	2.22075	2.22075	up	0	CUST_1284_PI428311958	0	lncRNA	NA	"chr1|mm9_knownGene_uc008hlj.1| strand:+ 246057919-246058000,246060276-246060287,246060290-246060306,246060307-246060356,246081085-246081098,246081105-246081172,246081173-246081224,246081232-246081263,246081265-246081326,246081333-246081364,246081376-246081399,246081402-246081447,246081448-246081523,246081524-246081625,246081627-246081896,246081897-246081915,246081926-246081952,246081953-24608205…	seq1288	uc008hlj.1	NA	chr1	+	246057920	246082192_x000D_
CUST_1205_PI428311958	8.26933	P	7.11927	P	2.21924	2.21924	up	0	CUST_1205_PI428311958	0	lncRNA	NA	"chr5|ri|B230347B12|PX00161C18|571| strand:+ 121659614-121659673,121659674-121659980,121659982-121660007,121660009-121660179,"	seq1208	PX00161C18	NA	chr5	+	121659616	121660176_x000D_
CUST_7199_PI428311958	6.95785	P	5.80845	P	2.21822	2.21822	up	0	CUST_7199_PI428311958	0	lncRNA	NA	rn4_all_mrna_FQ213287 range=chr10:74437857-74439301 5'pad=0 3'pad=0 strand=- repeatMasking=none	seq7272	FQ213287	NA	chr10	-	74437857	74439301_x000D_
CUST_4143_PI428311958	10.2851	P	9.13597	P	2.21776	2.21776	up	0	CUST_4143_PI428311958	0	lncRNA	NA	rn4_all_mrna_FQ211073 range=chr2:181168902-181177795 5'pad=0 3'pad=0 strand=- repeatMasking=none	seq4166	FQ211073	NA	chr2	-	181168902	181177795_x000D_
CUST_3977_PI428311958	9.43222	P	8.28332	P	2.21745	2.21745	up	0	CUST_3977_PI428311958	0	lncRNA	NA	rn4_all_mrna_FQ232879 range=chr2:59847095-59848118 5'pad=0 3'pad=0 strand=+ repeatMasking=none	seq3999	FQ232879	NA	chr2	+	59847095	59848118_x000D_
CUST_7680_PI428311958	5.64435	P	4.49727	A	2.21465	2.21465	up	0	CUST_7680_PI428311958	0	lncRNA	NA	rn4_all_mrna_FQ232998 range=chr13:44585317-44586461 5'pad=0 3'pad=0 strand=+ repeatMasking=none	seq7758	FQ232998	NA	chr13	+	44585317	44586461_x000D_
CUST_5109_PI428311958	6.77323	P	5.6265	P	2.21412	2.21412	up	0	CUST_5109_PI428311958	0	lncRNA	NA	rn4_all_mrna_BC098849 range=chr4:165817982-165836732 5'pad=0 3'pad=0 strand=+ repeatMasking=none	seq5146	BC098849	NA	chr4	+	165817982	165836732_x000D_
CUST_4112_PI428311958	8.4318	P	7.2864	P	2.21207	2.21207	up	0	CUST_4112_PI428311958	0	lncRNA	NA	rn4_all_mrna_FQ211169 range=chr2:171235526-171260506 5'pad=0 3'pad=0 strand=- repeatMasking=none	seq4135	FQ211169	NA	chr2	-	171235526	171260506_x000D_
CUST_1101_PI428311958	6.08472	P	4.93958	A	2.21167	2.21167	up	0	CUST_1101_PI428311958	0	lncRNA	NA	"chr3|gi|377834881|ref|XR_140519.1|| strand:- 41916818-41916833,41916750-41916817,41916739-41916745,41916612-41916738,41916563-41916611,41916511-41916562,41914324-41914501,41914259-41914322,41914131-41914257,"	seq1104	XR_140519.1	NA	chr3	-	41914132	41916832_x000D_
CUST_2396_PI428311958	9.74038	P	8.59584	P	2.21076	2.21076	up	0	CUST_2396_PI428311958	0	lncRNA	NA	"chr5|mm9_knownGene_uc012dhg.1| strand:- 118793172-118793243,118785718-118785811,118780418-118780509,118776966-118777039,118768548-118768558,118768258-118768330,118765848-118765901,118765809-118765846,118765717-118765808,118765681-118765706,118765590-118765672,"	seq2404	uc012dhg.1	NA	chr5	-	118765592	118793240_x000D_
CUST_7690_PI428311958	8.61332	P	7.46999	P	2.2089	2.2089	up	0	CUST_7690_PI428311958	0	lncRNA	NA	rn4_all_mrna_BC099203 range=chr13:48381594-48386392 5'pad=0 3'pad=0 strand=- repeatMasking=none	seq7768	BC099203	NA	chr13	-	48381594	48386392_x000D_
CUST_5287_PI428311958	7.97623	P	6.83363	P	2.20778	2.20778	up	0	CUST_5287_PI428311958	0	lncRNA	NA	rn4_all_mrna_FQ222105 range=chr5:70490344-70492036 5'pad=0 3'pad=0 strand=- repeatMasking=none	seq5331	FQ222105	NA	chr5	-	70490344	70492036_x000D_
CUST_5676_PI428311958	8.80281	P	7.66078	P	2.20691	2.20691	up	0	CUST_5676_PI428311958	0	lncRNA	NA	rn4_all_mrna_FQ211662 range=chr6:71842586-71865733 5'pad=0 3'pad=0 strand=- repeatMasking=none	seq5726	FQ211662	NA	chr6	-	71842586	71865733_x000D_
CUST_6776_PI428311958	9.234	P	8.09203	P	2.20682	2.20682	up	0	CUST_6776_PI428311958	0	lncRNA	NA	rn4_all_mrna_BC107559 range=chrX:25589068-25625017 5'pad=0 3'pad=0 strand=- repeatMasking=none	seq6844	BC107559	NA	chrX	-	25589068	25625017_x000D_
CUST_1707_PI428311958	8.57033	P	7.43185	P	2.2015	2.2015	up	0	CUST_1707_PI428311958	0	lncRNA	NA	"chr2|mm9_knownGene_uc011zrm.1| strand:+ 61789087-61789101,61789102-61789545,61815255-61815895,61815912-61815921,61815923-61815965,61815976-61815989,61815995-61816008,61816014-61816394,61816405-61816483,61816487-61816570,61816576-61816590,61816591-61816645,61816659-61816738,61816740-61816806,61816815-61816875,61816877-61817114,61817115-61817179,"	seq1713	uc011zrm.1	NA	chr2	+	61789088	61817180_x000D_
CUST_4536_PI428311958	13.0432	P	11.9092	P	2.19478	2.19478	up	0	CUST_4536_PI428311958	0	lncRNA	NA	rn4_all_mrna_FQ229236 range=chr3:89244464-89245331 5'pad=0 3'pad=0 strand=+ repeatMasking=none	seq4563	FQ229236	NA	chr3	+	89244464	89245331_x000D_
CUST_2090_PI428311958	5.53451	P	4.40312	A	2.1907	2.1907	up	0	CUST_2090_PI428311958	0	lncRNA	NA	"chr15|mm9_knownGene_uc007vbn.1| strand:- 108113413-108113539,108108573-108108688,"	seq2096	uc007vbn.1	NA	chr15	-	108108576	108113536_x000D_
CUST_5993_PI428311958	5.28091	P	4.15031	A	2.1895	2.1895	up	0	CUST_5993_PI428311958	0	lncRNA	NA	rn4_all_mrna_FQ229842 range=chr7:61368860-61369875 5'pad=0 3'pad=0 strand=- repeatMasking=none	seq6048	FQ229842	NA	chr7	-	61368860	61369875_x000D_
CUST_9783_PI428311958	6.09429	P	4.96528	A	2.18709	2.18709	up	0	CUST_9783_PI428311958	0	lncRNA	NA	"gi|295852494|ref|XR_006865.3| PREDICTED: Rattus norvegicus similar to importin 11 (LOC314407), miscRNA"	seq9884	XR_006865.3	NA	NA	NA	NA	NA_x000D_
CUST_7584_PI428311958	8.89417	P	7.76654	P	2.18499	2.18499	up	0	CUST_7584_PI428311958	0	lncRNA	NA	rn4_all_mrna_FQ211486 range=chr12:27760997-27761370 5'pad=0 3'pad=0 strand=- repeatMasking=none	seq7660	FQ211486	NA	chr12	-	27760997	27761370_x000D_
CUST_6432_PI428311958	5.98617	P	4.85858	A	2.18493	2.18493	up	0	CUST_6432_PI428311958	0	lncRNA	NA	rn4_all_mrna_BC083913 range=chr8:110501422-110516965 5'pad=0 3'pad=0 strand=+ repeatMasking=none	seq6495	BC083913	NA	chr8	+	110501422	110516965_x000D_
CUST_259_PI428311958	6.67618	P	5.55351	P	2.17749	2.17749	up	0	CUST_259_PI428311958	0	lncRNA	NA	"chr15|ri|A730004F22|PX00148F16|2487| strand:+ 23245737-23245771,23245772-23245889,23245890-23245976,23245978-23246001,23246009-23246044,23246054-23246109,23246110-23246164,23246165-23246261,23246269-23246297,23246300-23246305,23246307-23246317,23246320-23246470,23246480-23246542,23246550-23246573,23246575-23246624,23246631-23246776,23246778-23247127,23247129-23247165,23247166-23247191,23247199-2…	seq260	PX00148F16	NA	chr15	+	23245736	23248152_x000D_
CUST_1350_PI428311958	5.56756	P	4.44516	A	2.17709	2.17709	up	0	CUST_1350_PI428311958	0	lncRNA	NA	"chr8|mm9_knownGene_uc012hac.1| strand:- 112506170-112506309,112504454-112504533,"	seq1354	uc012hac.1	NA	chr8	-	112504456	112506312_x000D_
CUST_5889_PI428311958	5.34642	P	4.22442	A	2.17649	2.17649	up	0	CUST_5889_PI428311958	0	lncRNA	NA	rn4_all_mrna_FQ230748 range=chr7:9421844-9426228 5'pad=0 3'pad=0 strand=+ repeatMasking=none	seq5943	FQ230748	NA	chr7	+	9421844	9426228_x000D_
CUST_9019_PI428311958	12.7175	P	11.5971	P	2.17404	2.17404	up	0	CUST_9019_PI428311958	0	lncRNA	NA	rn4_all_mrna_FQ211256 range=chr20:17990472-17999138 5'pad=0 3'pad=0 strand=+ repeatMasking=none	seq9118	FQ211256	NA	chr20	+	17990472	17999138_x000D_
CUST_4018_PI428311958	8.37577	P	7.26003	P	2.16707	2.16707	up	0	CUST_4018_PI428311958	0	lncRNA	NA	rn4_all_mrna_FQ225256 range=chr2:113222719-113223905 5'pad=0 3'pad=0 strand=+ repeatMasking=none	seq4040	FQ225256	NA	chr2	+	113222719	113223905_x000D_
CUST_6884_PI428311958	10.602	P	9.48876	P	2.1633	2.1633	up	0	CUST_6884_PI428311958	0	lncRNA	NA	rn4_all_mrna_FQ219097 range=chrX:158917816-158922748 5'pad=0 3'pad=0 strand=- repeatMasking=none	seq6954	FQ219097	NA	chrX	-	158917816	158922748_x000D_
CUST_7024_PI428311958	9.57553	P	8.46259	P	2.16286	2.16286	up	0	CUST_7024_PI428311958	0	lncRNA	NA	rn4_all_mrna_FQ212370 range=chr10:31050235-31051077 5'pad=0 3'pad=0 strand=+ repeatMasking=none	seq7097	FQ212370	NA	chr10	+	31050235	31051077_x000D_
CUST_5899_PI428311958	8.11903	P	7.00638	P	2.16242	2.16242	up	0	CUST_5899_PI428311958	0	lncRNA	NA	rn4_all_mrna_BC168700 range=chr7:10686008-10698307 5'pad=0 3'pad=0 strand=+ repeatMasking=none	seq5953	BC168700	NA	chr7	+	10686008	10698307_x000D_
CUST_3300_PI428311958	7.97135	P	6.85917	P	2.16172	2.16172	up	0	CUST_3300_PI428311958	0	lncRNA	NA	rn4_all_mrna_FQ227423 range=chr1:27698893-27700035 5'pad=0 3'pad=0 strand=+ repeatMasking=none	seq3312	FQ227423	NA	chr1	+	27698893	27700035_x000D_
CUST_932_PI428311958	8.18086	P	7.069	P	2.16124	2.16124	up	0	CUST_932_PI428311958	0	lncRNA	NA	"chr13|mm9_knownGene_uc011wyh.1| strand:- 105155615-105155704,105155518-105155588,105155413-105155512,105150079-105150107,105149665-105149710,105148588-105148661,105145798-105145856,105145512-105145592,105144925-105145065,105144247-105144337,105140141-105140331,105135624-105135739,105131850-105131937,105131644-105131768,105129826-105129997,105127007-105127116,105126962-105127006,105122845-1051230…	seq935	uc011wyh.1	NA	chr13	-	105117482	105155704_x000D_
CUST_4449_PI428311958	8.62177	P	7.51116	P	2.15938	2.15938	up	0	CUST_4449_PI428311958	0	lncRNA	NA	rn4_all_mrna_FQ218702 range=chr3:34660319-34661743 5'pad=0 3'pad=0 strand=- repeatMasking=none	seq4476	FQ218702	NA	chr3	-	34660319	34661743_x000D_
CUST_8102_PI428311958	5.74775	P	4.63715	A	2.15935	2.15935	up	0	CUST_8102_PI428311958	0	lncRNA	NA	rn4_all_mrna_FQ227196 range=chr15:23235161-23235931 5'pad=0 3'pad=0 strand=+ repeatMasking=none	seq8188	FQ227196	NA	chr15	+	23235161	23235931_x000D_
CUST_8524_PI428311958	8.89682	P	7.78718	P	2.15792	2.15792	up	0	CUST_8524_PI428311958	0	lncRNA	NA	rn4_all_mrna_AY321345 range=chr17:33057789-33109076 5'pad=0 3'pad=0 strand=+ repeatMasking=none	seq8615	AY321345	NA	chr17	+	33057789	33109076_x000D_
CUST_3440_PI428311958	5.47099	P	4.36162	A	2.15751	2.15751	up	0	CUST_3440_PI428311958	0	lncRNA	NA	rn4_all_mrna_FQ233352 range=chr1:90755977-90757482 5'pad=0 3'pad=0 strand=- repeatMasking=none	seq3453	FQ233352	NA	chr1	-	90755977	90757482_x000D_
CUST_1614_PI428311958	5.40512	P	4.29611	A	2.15696	2.15696	up	0	CUST_1614_PI428311958	0	lncRNA	NA	"chr16|mm9_knownGene_uc012fzo.1| strand:+ 81709042-81709187,81719368-81719464,81722261-81722328,81725294-81725374,81726325-81726426,81726427-81726515,81727945-81728034,81728035-81728114,81729797-81729916,81730437-81730536,81733471-81733543,81734859-81735012,81736030-81736034,81740446-81740556,81740848-81740956,81741956-81742142,81742251-81742253,81743887-81744020,81744708-81744778,81748900-817490…	seq1620	uc012fzo.1	NA	chr16	+	81709040	81769680_x000D_
CUST_1369_PI428311958	9.55621	P	8.44828	P	2.15537	2.15537	up	0	CUST_1369_PI428311958	0	lncRNA	NA	"chr10|mm9_knownGene_uc007keu.2| strand:+ 63096652-63096851,63099323-63099401,63103020-63103156,63108895-63108955,63108956-63108989,63108996-63109109,63109110-63109127,63109128-63109264,63109267-63109575,63109576-63109631,63109632-63109663,63109667-63109922,63109924-63109977,63109982-63109989,63109991-63110027,63110029-63110105,"	seq1373	uc007keu.2	NA	chr10	+	63096652	63110104_x000D_
CUST_4859_PI428311958	5.44304	P	4.33514	A	2.15532	2.15532	up	0	CUST_4859_PI428311958	0	lncRNA	NA	rn4_all_mrna_FQ225910 range=chr4:60992593-60993533 5'pad=0 3'pad=0 strand=+ repeatMasking=none	seq4891	FQ225910	NA	chr4	+	60992593	60993533_x000D_
CUST_8948_PI428311958	5.9906	P	4.88298	A	2.15489	2.15489	up	0	CUST_8948_PI428311958	0	lncRNA	NA	rn4_all_mrna_FQ228101 range=chr19:58488530-58489729 5'pad=0 3'pad=0 strand=+ repeatMasking=none	seq9046	FQ228101	NA	chr19	+	58488530	58489729_x000D_
CUST_4552_PI428311958	9.55701	P	8.45418	P	2.14776	2.14776	up	0	CUST_4552_PI428311958	0	lncRNA	NA	rn4_all_mrna_FQ234067 range=chr3:103370424-103371280 5'pad=0 3'pad=0 strand=- repeatMasking=none	seq4579	FQ234067	NA	chr3	-	103370424	103371280_x000D_
CUST_6124_PI428311958	6.95649	P	5.85395	P	2.14731	2.14731	up	0	CUST_6124_PI428311958	0	lncRNA	NA	rn4_all_mrna_FQ226363 range=chr7:133032032-133032938 5'pad=0 3'pad=0 strand=- repeatMasking=none	seq6181	FQ226363	NA	chr7	-	133032032	133032938_x000D_
CUST_9752_PI428311958	9.67371	P	8.57216	P	2.14585	2.14585	up	0	CUST_9752_PI428311958	0	lncRNA	NA	"gi|295852335|ref|XR_086168.2| PREDICTED: Rattus norvegicus similar to neurobeachin (RGD1562629), partial miscRNA"	seq9853	XR_086168.2	NA	NA	NA	NA	NA_x000D_
CUST_9065_PI428311958	6.94148	P	5.83993	P	2.14585	2.14585	up	0	CUST_9065_PI428311958	0	lncRNA	NA	rn4_all_mrna_FQ213022 range=chr20:43695983-43696987 5'pad=0 3'pad=0 strand=+ repeatMasking=none	seq9164	FQ213022	NA	chr20	+	43695983	43696987_x000D_
CUST_3145_PI428311958	5.73583	P	4.63469	A	2.14524	2.14524	up	0	CUST_3145_PI428311958	0	lncRNA	NA	uc.417+	seq3154	uc.417+	NA	chr10	-	85022960	85023184_x000D_
CUST_9205_PI428311958	7.44638	P	6.34677	P	2.14297	2.14297	up	0	CUST_9205_PI428311958	0	lncRNA	NA	"gi|293340639|ref|XR_085566.1| PREDICTED: Rattus norvegicus hypothetical protein LOC688328 (LOC688328), miscRNA"	seq9306	XR_085566.1	NA	NA	NA	NA	NA_x000D_
CUST_1602_PI428311958	6.69691	P	5.59837	P	2.14138	2.14138	up	0	CUST_1602_PI428311958	0	lncRNA	NA	"chr6|gi|377833238|ref|XR_106733.2|| strand:+ 109396504-109396541,109396544-109396685,109396686-109396744,109396745-109396767,109396769-109396822,109396823-109396894,109396895-109396928,109396929-109396953,109396956-109396992,109396993-109396997,109397011-109397026,109397028-109397045,109397047-109397148,"	seq1608	XR_106733.2	NA	chr6	+	109396504	109397152_x000D_
CUST_9620_PI428311958	7.83689	P	6.74254	P	2.13516	2.13516	up	0	CUST_9620_PI428311958	0	lncRNA	NA	"gi|295851840|ref|XR_085787.2| PREDICTED: Rattus norvegicus RIKEN cDNA 2610510H03-like (LOC100365658), miscRNA"	seq9721	XR_085787.2	NA	NA	NA	NA	NA_x000D_
CUST_1136_PI428311958	13.2091	P	12.1149	P	2.135	2.135	up	0	CUST_1136_PI428311958	0	lncRNA	NA	"chr10|mm9_knownGene_uc007jnu.1| strand:+ 55254660-55254672,55254678-55254740,55254747-55254836,55254951-55254959,55269984-55270044,55270050-55270077,55275542-55275625,55276258-55276349,55277012-55277081,55277252-55277256,55278419-55278545,55278716-55278786,55279917-55280099,55281435-55281588,55282483-55282570,55283556-55283970,55284283-55284373,55286038-55286150,55289714-55289874,55293334-552934…	seq1139	uc007jnu.1	NA	chr10	+	55254660	55304144_x000D_
CUST_1968_PI428311958	5.6431	P	4.55006	A	2.13323	2.13323	up	0	CUST_1968_PI428311958	0	lncRNA	NA	"chr3|gi|377834916|ref|XR_140547.1|| strand:- 53744202-53744335,53744179-53744200,53744171-53744178,53743983-53744167,53741191-53741315,"	seq1974	XR_140547.1	NA	chr3	-	53741192	53744336_x000D_
CUST_5583_PI428311958	8.10338	P	7.01082	P	2.13252	2.13252	up	0	CUST_5583_PI428311958	0	lncRNA	NA	rn4_all_mrna_FQ217471 range=chr6:10298875-10299242 5'pad=0 3'pad=0 strand=+ repeatMasking=none	seq5633	FQ217471	NA	chr6	+	10298875	10299242_x000D_
CUST_6087_PI428311958	9.19748	P	8.10677	P	2.12979	2.12979	up	0	CUST_6087_PI428311958	0	lncRNA	NA	rn4_all_mrna_FQ233597 range=chr7:119692725-119693510 5'pad=0 3'pad=0 strand=- repeatMasking=none	seq6143	FQ233597	NA	chr7	-	119692725	119693510_x000D_
CUST_4282_PI428311958	11.6026	P	10.5131	P	2.12812	2.12812	up	0	CUST_4282_PI428311958	0	lncRNA	NA	rn4_all_mrna_AY310136 range=chr2:235948999-235990640 5'pad=0 3'pad=0 strand=+ repeatMasking=none	seq4307	AY310136	NA	chr2	+	235948999	235990640_x000D_
CUST_2374_PI428311958	6.62757	P	5.53958	P	2.12577	2.12577	up	0	CUST_2374_PI428311958	0	lncRNA	NA	"chr18|mm9_knownGene_uc008fnb.2| strand:+ 64387670-64387937,64387943-64388241,64388297-64388512,64388527-64388563,64389738-64389887,64393940-64394170,64396864-64396985,64397175-64397311,64397427-64397487,64398416-64398539,64398653-64398739,64399584-64399699,64400811-64400989,64401526-64401529,64402478-64402564,64403798-64403974,64410558-64410814,64411245-64411312,64414719-64414861,64417891-644180…	seq2382	uc008fnb.2	NA	chr18	+	64387672	64439624_x000D_
CUST_7465_PI428311958	8.76077	P	7.67543	P	2.12188	2.12188	up	0	CUST_7465_PI428311958	0	lncRNA	NA	rn4_all_mrna_FQ221676 range=chr11:70592072-70592302 5'pad=0 3'pad=0 strand=+ repeatMasking=none	seq7541	FQ221676	NA	chr11	+	70592072	70592302_x000D_
CUST_6809_PI428311958	6.23128	P	5.14643	A	2.12115	2.12115	up	0	CUST_6809_PI428311958	0	lncRNA	NA	rn4_all_mrna_FQ223098 range=chrX:52667643-52667866 5'pad=0 3'pad=0 strand=- repeatMasking=none	seq6877	FQ223098	NA	chrX	-	52667643	52667866_x000D_
CUST_5702_PI428311958	6.02174	P	4.93751	A	2.12025	2.12025	up	0	CUST_5702_PI428311958	0	lncRNA	NA	rn4_all_mrna_FQ227960 range=chr6:91297895-91298374 5'pad=0 3'pad=0 strand=- repeatMasking=none	seq5752	FQ227960	NA	chr6	-	91297895	91298374_x000D_
CUST_5265_PI428311958	6.61934	P	5.53653	P	2.11816	2.11816	up	0	CUST_5265_PI428311958	0	lncRNA	NA	rn4_all_mrna_FQ215945 range=chr5:59846203-59846576 5'pad=0 3'pad=0 strand=- repeatMasking=none	seq5308	FQ215945	NA	chr5	-	59846203	59846576_x000D_
CUST_9567_PI428311958	8.84123	P	7.7607	P	2.11482	2.11482	up	0	CUST_9567_PI428311958	0	lncRNA	NA	"gi|295851699|ref|XR_085664.2| PREDICTED: Rattus norvegicus similar to SEC13-like 1 (LOC684667), miscRNA"	seq9668	XR_085664.2	NA	NA	NA	NA	NA_x000D_
CUST_4698_PI428311958	6.45095	P	5.37358	A	2.11019	2.11019	up	0	CUST_4698_PI428311958	0	lncRNA	NA	rn4_all_mrna_FQ227520 range=chr3:156859527-156860644 5'pad=0 3'pad=0 strand=- repeatMasking=none	seq4727	FQ227520	NA	chr3	-	156859527	156860644_x000D_
CUST_8321_PI428311958	7.2691	P	6.19285	P	2.10855	2.10855	up	0	CUST_8321_PI428311958	0	lncRNA	NA	rn4_all_mrna_FQ234091 range=chr16:18397390-18398330 5'pad=0 3'pad=0 strand=- repeatMasking=none	seq8411	FQ234091	NA	chr16	-	18397390	18398330_x000D_
CUST_8432_PI428311958	10.2355	P	9.16265	P	2.1036	2.1036	up	0	CUST_8432_PI428311958	0	lncRNA	NA	rn4_all_mrna_FQ229485 range=chr17:27128790-27132507 5'pad=0 3'pad=0 strand=- repeatMasking=none	seq8523	FQ229485	NA	chr17	-	27128790	27132507_x000D_
CUST_6678_PI428311958	5.6011	P	4.52925	A	2.10212	2.10212	up	0	CUST_6678_PI428311958	0	lncRNA	NA	rn4_all_mrna_FQ233124 range=chr9:86576814-86593746 5'pad=0 3'pad=0 strand=+ repeatMasking=none	seq6744	FQ233124	NA	chr9	+	86576814	86593746_x000D_
CUST_864_PI428311958	6.9398	P	5.86838	P	2.10151	2.10151	up	0	CUST_864_PI428311958	0	lncRNA	NA	"chr10|gi|377835832|ref|XR_106387.2|| strand:+ 109950225-109950273,109950276-109950403,109950404-109950421,109950426-109950518,109950520-109950535,109950536-109950576,109950578-109950615,109950629-109950636,109950653-109950683,109950685-109950718,109950723-109950730,109950750-109950797,109950799-109950932,109950936-109951055,109951056-109951094,"	seq867	XR_106387.2	NA	chr10	+	109950225	109951094_x000D_
CUST_3209_PI428311958	7.08996	P	6.01891	P	2.10097	2.10097	up	0	CUST_3209_PI428311958	0	lncRNA	NA	rn4_all_mrna_AY325187 range=chr1:41922046-42007300 5'pad=0 3'pad=0 strand=+ repeatMasking=none	seq3218	AY325187	NA	chr1	+	41922046	42007300_x000D_
CUST_4650_PI428311958	6.87662	P	5.80581	P	2.10061	2.10061	up	0	CUST_4650_PI428311958	0	lncRNA	NA	rn4_all_mrna_AJ297794 range=chr3:145878005-145882899 5'pad=0 3'pad=0 strand=+ repeatMasking=none	seq4678	AJ297794	NA	chr3	+	145878005	145882899_x000D_
CUST_503_PI428311958	10.0537	P	8.9834	P	2.09988	2.09988	up	0	CUST_503_PI428311958	0	lncRNA	NA	"chr10|ri|5430401G19|PX00022E23|1072| strand:- 35852769-35852840,35852726-35852753,35852703-35852725,35852693-35852698,35852239-35852690,35852222-35852229,35852189-35852220,35851886-35852188,35851867-35851876,35851790-35851855,35851774-35851783,"	seq505	PX00022E23	NA	chr10	-	35851774	35852840_x000D_
CUST_2710_PI428311958	10.2422	P	9.17428	P	2.09634	2.09634	up	0	CUST_2710_PI428311958	0	lncRNA	NA	"chr3|gi|357527459|ref|NR_045534.1|| strand:+ 133114841-133115079,133115181-133115266,133116013-133116158,133117051-133117203,133117540-133117655,133119816-133119926,133121873-133121956,133125025-133125105,133125992-133126098,133129173-133129326,133132304-133132381,133140360-133140521,133142084-133142170,133142579-133142734,133143208-133143273,133146250-133146448,133146453-133146577,133146578-133…	seq2719	NR_045534.1	NA	chr3	+	133114840	133146720_x000D_
CUST_594_PI428311958	7.55242	P	6.48473	P	2.09608	2.09608	up	0	CUST_594_PI428311958	0	lncRNA	NA	"chr14|mm9_knownGene_uc007idg.1| strand:- 101520663-101521321,101519484-101520659,101519479-101519483,101519382-101519469,101507229-101507379,101504182-101504288,101503542-101503544,101503479-101503533,101499139-101499258,101494287-101494761,101494221-101494273,101494148-101494220,101493968-101494146,101493894-101493924,101493864-101493888,101493785-101493855,101493749-101493784,101493614-1014937…	seq596	uc007idg.1	NA	chr14	-	101482830	101521321_x000D_
CUST_2390_PI428311958	11.0041	P	9.93656	P	2.09581	2.09581	up	0	CUST_2390_PI428311958	0	lncRNA	NA	"chr18|mm9_knownGene_uc008ffi.1| strand:+ 62096593-62096726,62104993-62105099,62108097-62108176,62110276-62110395,62112181-62112228,62112831-62113030,"	seq2398	uc008ffi.1	NA	chr18	+	62096592	62113032_x000D_
CUST_6753_PI428311958	7.51116	P	6.44426	P	2.09492	2.09492	up	0	CUST_6753_PI428311958	0	lncRNA	NA	rn4_all_mrna_FQ221759 range=chrX:3010288-3010675 5'pad=0 3'pad=0 strand=- repeatMasking=none	seq6821	FQ221759	NA	chrX	-	3010288	3010675_x000D_
CUST_1344_PI428311958	10.1937	P	9.12823	P	2.09292	2.09292	up	0	CUST_1344_PI428311958	0	lncRNA	NA	"chr2|ri|2900053A11|ZX00069G11|620| strand:+ 203930943-203930958,203930961-203931266,203931273-203931532,203931534-203931558,"	seq1348	ZX00069G11	NA	chr2	+	203930944	203931552_x000D_
CUST_9083_PI428311958	8.33015	P	7.26585	P	2.09116	2.09116	up	0	CUST_9083_PI428311958	0	lncRNA	NA	rn4_all_mrna_FQ211888 range=chr20:50963792-50968949 5'pad=0 3'pad=0 strand=+ repeatMasking=none	seq9182	FQ211888	NA	chr20	+	50963792	50968949_x000D_
CUST_6765_PI428311958	12.8451	P	11.7831	P	2.08775	2.08775	up	0	CUST_6765_PI428311958	0	lncRNA	NA	rn4_all_mrna_BC079476 range=chrX:12990197-12992160 5'pad=0 3'pad=0 strand=+ repeatMasking=none	seq6833	BC079476	NA	chrX	+	12990197	12992160_x000D_
CUST_3965_PI428311958	6.2279	P	5.16623	A	2.08734	2.08734	up	0	CUST_3965_PI428311958	0	lncRNA	NA	rn4_all_mrna_FQ226613 range=chr2:52268616-52288888 5'pad=0 3'pad=0 strand=+ repeatMasking=none	seq3987	FQ226613	NA	chr2	+	52268616	52288888_x000D_
CUST_1244_PI428311958	9.80735	P	8.74631	P	2.08644	2.08644	up	0	CUST_1244_PI428311958	0	lncRNA	NA	"chr10|ri|I420015C23|PL00044K01|1398| strand:+ 83638036-83638104,83638105-83638117,83638118-83638157,83638158-83638245,83638246-83638357,83638360-83638439,83638441-83638514,83638517-83638624,83638630-83638635,83638642-83638654,83638660-83638763,83638769-83638827,83638828-83638850,83638851-83638943,83638945-83638979,83638981-83638990,83638991-83639024,83639025-83639066,83639085-83639092,83639097-8…	seq1248	PL00044K01	NA	chr10	+	83638032	83639360_x000D_
CUST_5636_PI428311958	8.03426	P	6.97679	P	2.08129	2.08129	up	0	CUST_5636_PI428311958	0	lncRNA	NA	rn4_all_mrna_BC158664 range=chr6:46466455-46512390 5'pad=0 3'pad=0 strand=- repeatMasking=none	seq5686	BC158664	NA	chr6	-	46466455	46512390_x000D_
CUST_1208_PI428311958	11.6266	P	10.5724	P	2.07668	2.07668	up	0	CUST_1208_PI428311958	0	lncRNA	NA	"chrX|gi|377835244|ref|XR_140743.1|| strand:+ 12990187-12990402,12991647-12991776,12991945-12992104,12992119-12992122,12992124-12992127,12992128-12992164,"	seq1211	XR_140743.1	NA	chrX	+	12990187	12992164_x000D_
CUST_7884_PI428311958	5.3514	P	4.29732	A	2.0764	2.0764	up	0	CUST_7884_PI428311958	0	lncRNA	NA	rn4_all_mrna_BC103651 range=chr14:13959630-13988107 5'pad=0 3'pad=0 strand=- repeatMasking=none	seq7966	BC103651	NA	chr14	-	13959630	13988107_x000D_
CUST_9736_PI428311958	9.17664	P	8.12256	P	2.07639	2.07639	up	0	CUST_9736_PI428311958	0	lncRNA	NA	"gi|295852252|ref|XR_086107.2| PREDICTED: Rattus norvegicus hippocampus abundant gene transcript 1-like (LOC100362903), miscRNA"	seq9837	XR_086107.2	NA	NA	NA	NA	NA_x000D_
CUST_7422_PI428311958	9.91777	P	8.86449	P	2.07524	2.07524	up	0	CUST_7422_PI428311958	0	lncRNA	NA	rn4_all_mrna_FQ221474 range=chr11:55887486-55888093 5'pad=0 3'pad=0 strand=+ repeatMasking=none	seq7498	FQ221474	NA	chr11	+	55887486	55888093_x000D_
CUST_6612_PI428311958	5.86818	P	4.81509	A	2.07496	2.07496	up	0	CUST_6612_PI428311958	0	lncRNA	NA	rn4_all_mrna_FQ220643 range=chr9:59080404-59081182 5'pad=0 3'pad=0 strand=+ repeatMasking=none	seq6678	FQ220643	NA	chr9	+	59080404	59081182_x000D_
CUST_9268_PI428311958	6.06395	P	5.01125	A	2.0744	2.0744	up	0	CUST_9268_PI428311958	0	lncRNA	NA	"gi|293343542|ref|XR_085694.1| PREDICTED: Rattus norvegicus similar to dihydrolipoamide S-acetyltransferase (E2 component of pyruvate dehydrogenase complex) (LOC682629), miscRNA"	seq9369	XR_085694.1	NA	NA	NA	NA	NA_x000D_
CUST_7535_PI428311958	10.0565	P	9.00461	P	2.07328	2.07328	up	0	CUST_7535_PI428311958	0	lncRNA	NA	rn4_all_mrna_FQ213171 range=chr12:8716106-8716747 5'pad=0 3'pad=0 strand=- repeatMasking=none	seq7611	FQ213171	NA	chr12	-	8716106	8716747_x000D_
CUST_1769_PI428311958	5.27877	P	4.22691	A	2.0732	2.0732	up	0	CUST_1769_PI428311958	0	lncRNA	NA	"chr4|mm9_knownGene_uc009sjz.1| strand:+ 150824016-150824132,150825627-150825776,150834790-150834878,"	seq1775	uc009sjz.1	NA	chr4	+	150824016	150834880_x000D_
CUST_8325_PI428311958	7.71948	P	6.66866	P	2.07171	2.07171	up	0	CUST_8325_PI428311958	0	lncRNA	NA	rn4_all_mrna_FQ233063 range=chr16:19181323-19184615 5'pad=0 3'pad=0 strand=+ repeatMasking=none	seq8415	FQ233063	NA	chr16	+	19181323	19184615_x000D_
CUST_3473_PI428311958	7.80731	P	6.75722	P	2.07065	2.07065	up	0	CUST_3473_PI428311958	0	lncRNA	NA	rn4_all_mrna_FQ226450 range=chr1:107334934-107335664 5'pad=0 3'pad=0 strand=- repeatMasking=none	seq3486	FQ226450	NA	chr1	-	107334934	107335664_x000D_
CUST_8279_PI428311958	9.84475	P	8.79528	P	2.06978	2.06978	up	0	CUST_8279_PI428311958	0	lncRNA	NA	rn4_all_mrna_FQ217977 range=chr16:1705560-1735806 5'pad=0 3'pad=0 strand=- repeatMasking=none	seq8369	FQ217977	NA	chr16	-	1705560	1735806_x000D_
CUST_9217_PI428311958	8.16319	P	7.11383	P	2.06961	2.06961	up	0	CUST_9217_PI428311958	0	lncRNA	NA	"gi|293341307|ref|XR_009610.2| PREDICTED: Rattus norvegicus similar to RAB3 GTPase-activating protein (RGD1306487), miscRNA"	seq9318	XR_009610.2	NA	NA	NA	NA	NA_x000D_
CUST_7914_PI428311958	9.19883	P	8.15038	P	2.06831	2.06831	up	0	CUST_7914_PI428311958	0	lncRNA	NA	rn4_all_mrna_FQ211842 range=chr14:33577798-33583342 5'pad=0 3'pad=0 strand=- repeatMasking=none	seq7996	FQ211842	NA	chr14	-	33577798	33583342_x000D_
CUST_1367_PI428311958	6.9342	P	5.88766	P	2.06557	2.06557	up	0	CUST_1367_PI428311958	0	lncRNA	NA	"chr7|mm9_knownGene_uc007fyu.1| strand:+ 11694249-11694410,11697466-11697473,11697477-11697481,11697482-11697741,11700998-11701055,11701250-11701420,"	seq1371	uc007fyu.1	NA	chr7	+	11694249	11701420_x000D_
CUST_2395_PI428311958	9.43636	P	8.38982	P	2.06556	2.06556	up	0	CUST_2395_PI428311958	0	lncRNA	NA	"chr4|mm9_knownGene_uc009ddr.1| strand:+ 144349934-144350268,144350269-144350520,144358085-144358088,144359048-144359110,144363328-144363431,144364555-144364726,144366443-144366626,144368458-144368632,144370731-144370851,144371432-144371602,144373593-144373684,144373686-144373737,144373738-144373761,144373773-144373796,144373803-144373823,144373824-144373840,144373841-144373890,144375125-14437522…	seq2403	uc009ddr.1	NA	chr4	+	144349936	144382672_x000D_
CUST_3041_PI428311958	5.20047	P	4.15423	A	2.06515	2.06515	up	0	CUST_3041_PI428311958	0	lncRNA	NA	uc.308+	seq3050	uc.308+	NA	chr1	+	250636336	250636624_x000D_
CUST_5515_PI428311958	8.16397	P	7.11788	P	2.06492	2.06492	up	0	CUST_5515_PI428311958	0	lncRNA	NA	rn4_all_mrna_FQ212138 range=chr6:9412281-9594798 5'pad=0 3'pad=0 strand=- repeatMasking=none	seq5563	FQ212138	NA	chr6	-	9412281	9594798_x000D_
CUST_84_PI428311958	10.0712	P	9.02552	P	2.06434	2.06434	up	0	CUST_84_PI428311958	0	lncRNA	NA	"chr11|ri|9530072E15|PX00114G07|766| strand:- 67603265-67603284,67603196-67603231,67603069-67603194,67603048-67603067,67602976-67603045,67602920-67602962,67602868-67602891,67602858-67602864,67602840-67602854,67602740-67602839,67602540-67602737,"	seq84	PX00114G07	NA	chr11	-	67602540	67603284_x000D_
CUST_771_PI428311958	9.70481	P	8.66061	P	2.06222	2.06222	up	0	CUST_771_PI428311958	0	lncRNA	NA	"chr8|ri|G630070N02|PL00014I03|3373| strand:- 111885044-111885209,111884942-111885041,111884935-111884940,111884907-111884933,111884885-111884906,111884864-111884883,111884842-111884861,111884724-111884840,111884671-111884716,111884633-111884663,111884577-111884631,111884531-111884576,111884488-111884530,111884468-111884486,111884441-111884465,111884190-111884438,111884168-111884189,111884156-111…	seq774	PL00014I03	NA	chr8	-	111881935	111885209_x000D_
CUST_4936_PI428311958	5.0829	P	4.04258	A	2.05668	2.05668	up	0	CUST_4936_PI428311958	0	lncRNA	NA	rn4_all_mrna_BC088230 range=chr4:87856589-87931447 5'pad=0 3'pad=0 strand=- repeatMasking=none	seq4970	BC088230	NA	chr4	-	87856589	87931447_x000D_
CUST_4042_PI428311958	10.4943	P	9.45469	P	2.05572	2.05572	up	0	CUST_4042_PI428311958	0	lncRNA	NA	rn4_all_mrna_FQ212146 range=chr2:120388914-120393190 5'pad=0 3'pad=0 strand=- repeatMasking=none	seq4065	FQ212146	NA	chr2	-	120388914	120393190_x000D_
CUST_1541_PI428311958	5.63121	P	4.59167	A	2.05558	2.05558	up	0	CUST_1541_PI428311958	0	lncRNA	NA	"chr13|mm9_knownGene_uc007cyp.1| strand:+ 66216895-66216932,66216933-66216966,66216967-66217139,66221677-66221785,66221797-66221847,66221848-66221854,66221856-66221881,66223305-66223433,66223853-66224022,66224141-66224216,66226104-66226277,66226811-66226936,66227340-66227401,66227402-66227493,66227495-66227569,66227573-66227599,66227632-66227738,66227739-66227853,66227854-66227874,66227875-662279…	seq1547	uc007cyp.1	NA	chr13	+	66216896	66236580_x000D_
CUST_5500_PI428311958	10.5736	P	9.53627	P	2.05246	2.05246	up	0	CUST_5500_PI428311958	0	lncRNA	NA	rn4_all_mrna_FQ221381 range=chr5:172387063-172388180 5'pad=0 3'pad=0 strand=- repeatMasking=none	seq5547	FQ221381	NA	chr5	-	172387063	172388180_x000D_
CUST_4792_PI428311958	9.39603	P	8.3588	P	2.0523	2.0523	up	0	CUST_4792_PI428311958	0	lncRNA	NA	rn4_all_mrna_FQ211558 range=chr4:2230455-2264497 5'pad=0 3'pad=0 strand=- repeatMasking=none	seq4823	FQ211558	NA	chr4	-	2230455	2264497_x000D_
CUST_8920_PI428311958	5.74564	P	4.70867	A	2.05191	2.05191	up	0	CUST_8920_PI428311958	0	lncRNA	NA	rn4_all_mrna_FQ235204 range=chr19:47036748-47037596 5'pad=0 3'pad=0 strand=+ repeatMasking=none	seq9017	FQ235204	NA	chr19	+	47036748	47037596_x000D_
CUST_1785_PI428311958	5.49402	P	4.45712	A	2.05182	2.05182	up	0	CUST_1785_PI428311958	0	lncRNA	NA	"chr3|mm9_knownGene_uc008ixi.1| strand:- 6347242-6347548,6346998-6347240,6227934-6227992,6207848-6207916,6191468-6191570,6189821-6189835,6188774-6188872,6187101-6187169,6185664-6185762,6182483-6182584,6181667-6181762,6181193-6181261,6178474-6178560,6176318-6176403,6175525-6175657,6172997-6173107,6171493-6171594,6171179-6171269,6167671-6167799,6166745-6166749,6166355-6166425,6165040-6165092,616264…	seq1791	uc008ixi.1	NA	chr3	-	6155270	6347548_x000D_
CUST_7632_PI428311958	6.74514	P	5.70963	P	2.04984	2.04984	up	0	CUST_7632_PI428311958	0	lncRNA	NA	rn4_all_mrna_BC079189 range=chr12:46036777-46066114 5'pad=0 3'pad=0 strand=+ repeatMasking=none	seq7709	BC079189	NA	chr12	+	46036777	46066114_x000D_
CUST_7849_PI428311958	5.62429	P	4.58914	A	2.04933	2.04933	up	0	CUST_7849_PI428311958	0	lncRNA	NA	rn4_all_mrna_FQ234928 range=chr14:33678161-33703083 5'pad=0 3'pad=0 strand=- repeatMasking=none	seq7930	FQ234928	NA	chr14	-	33678161	33703083_x000D_
CUST_6698_PI428311958	5.98289	P	4.94841	A	2.04837	2.04837	up	0	CUST_6698_PI428311958	0	lncRNA	NA	rn4_all_mrna_FQ235032 range=chr9:93106478-93107652 5'pad=0 3'pad=0 strand=+ repeatMasking=none	seq6764	FQ235032	NA	chr9	+	93106478	93107652_x000D_
CUST_2249_PI428311958	7.54139	P	6.50883	P	2.04565	2.04565	up	0	CUST_2249_PI428311958	0	lncRNA	NA	"chr11|ri|2810028C22|ZX00065A01|1184| strand:+ 55887833-55887979,55887981-55888029,55888031-55888581,55888582-55888753,55888755-55888811,55888813-55888846,55888848-55888897,55888918-55888921,55888923-55888927,55888929-55888957,55888959-55888983,55888989-55889013,55889079-55889085,"	seq2255	ZX00065A01	NA	chr11	+	55887832	55889084_x000D_
CUST_5153_PI428311958	8.70919	P	7.67746	P	2.04447	2.04447	up	0	CUST_5153_PI428311958	0	lncRNA	NA	rn4_all_mrna_FQ215404 range=chr5:24893554-24918258 5'pad=0 3'pad=0 strand=- repeatMasking=none	seq5192	FQ215404	NA	chr5	-	24893554	24918258_x000D_
CUST_1415_PI428311958	7.30709	P	6.279	P	2.03931	2.03931	up	0	CUST_1415_PI428311958	0	lncRNA	NA	"chr6|mm9_knownGene_uc008dpl.1| strand:- 1715684-1715862,1714548-1714796,1713606-1714488,1710854-1711086,1710111-1710294,1708161-1708249,1706285-1706338,1705432-1705534,1705271-1705325,1703975-1704027,1702722-1702825,1702002-1702059,1701788-1701794,1701781-1701786,1701621-1701779,1700766-1700855,1699889-1699947,1699712-1699793,1699054-1699150,1699015-1699053,1698820-1699000,1698754-1698776,169873…	seq1420	uc008dpl.1	NA	chr6	-	1698167	1715862_x000D_
CUST_7390_PI428311958	8.66563	M	7.63969	P	2.03628	2.03628	up	0	CUST_7390_PI428311958	0	lncRNA	NA	rn4_all_mrna_BC087644 range=chr11:31607604-31620072 5'pad=0 3'pad=0 strand=- repeatMasking=none	seq7466	BC087644	NA	chr11	-	31607604	31620072_x000D_
CUST_6380_PI428311958	5.39221	P	4.36632	A	2.03622	2.03622	up	0	CUST_6380_PI428311958	0	lncRNA	NA	rn4_all_mrna_FQ230929 range=chr8:88045585-88046387 5'pad=0 3'pad=0 strand=- repeatMasking=none	seq6443	FQ230929	NA	chr8	-	88045585	88046387_x000D_
CUST_8540_PI428311958	8.97439	P	7.95052	P	2.03337	2.03337	up	0	CUST_8540_PI428311958	0	lncRNA	NA	rn4_all_mrna_FQ216444 range=chr17:40430016-40434318 5'pad=0 3'pad=0 strand=+ repeatMasking=none	seq8631	FQ216444	NA	chr17	+	40430016	40434318_x000D_
CUST_4109_PI428311958	7.97798	P	6.95425	P	2.03316	2.03316	up	0	CUST_4109_PI428311958	0	lncRNA	NA	rn4_all_mrna_FQ235278 range=chr2:166402509-166406680 5'pad=0 3'pad=0 strand=- repeatMasking=none	seq4132	FQ235278	NA	chr2	-	166402509	166406680_x000D_
CUST_6804_PI428311958	11.2422	P	10.2199	P	2.03122	2.03122	up	0	CUST_6804_PI428311958	0	lncRNA	NA	rn4_all_mrna_FQ231318 range=chrX:47315152-47316387 5'pad=0 3'pad=0 strand=+ repeatMasking=none	seq6872	FQ231318	NA	chrX	+	47315152	47316387_x000D_
CUST_4547_PI428311958	5.90979	P	4.88763	A	2.03095	2.03095	up	0	CUST_4547_PI428311958	0	lncRNA	NA	rn4_all_mrna_FQ211247 range=chr3:95746371-95772917 5'pad=0 3'pad=0 strand=- repeatMasking=none	seq4574	FQ211247	NA	chr3	-	95746371	95772917_x000D_
CUST_5217_PI428311958	8.56407	P	7.54643	P	2.0246	2.0246	up	0	CUST_5217_PI428311958	0	lncRNA	NA	rn4_all_mrna_FQ217575 range=chr5:24893551-24898144 5'pad=0 3'pad=0 strand=- repeatMasking=none	seq5260	FQ217575	NA	chr5	-	24893551	24898144_x000D_
CUST_846_PI428311958	7.1919	P	6.17497	P	2.02361	2.02361	up	0	CUST_846_PI428311958	0	lncRNA	NA	"chr1|mm9_knownGene_uc012fxw.1| strand:+ 203385333-203385395,203385396-203385516,203385523-203385559,203426072-203426162,"	seq849	uc012fxw.1	NA	chr1	+	203385333	203426162_x000D_
CUST_5541_PI428311958	7.68011	P	6.66391	P	2.02259	2.02259	up	0	CUST_5541_PI428311958	0	lncRNA	NA	rn4_all_mrna_FQ220776 range=chr6:77813522-77959804 5'pad=0 3'pad=0 strand=+ repeatMasking=none	seq5591	FQ220776	NA	chr6	+	77813522	77959804_x000D_
CUST_1391_PI428311958	7.50108	P	6.48567	P	2.02147	2.02147	up	0	CUST_1391_PI428311958	0	lncRNA	NA	"chr6|ri|1110017L17|R000014N19|727| strand:- 74962985-74963120,74962861-74962984,74962711-74962859,74962692-74962705,74962649-74962684,74962630-74962639,74962549-74962576,74962465-74962542,74962428-74962464,74962397-74962424,"	seq1395	R000014N19	NA	chr6	-	74962400	74963120_x000D_
CUST_9822_PI428311958	7.63427	P	6.6189	P	2.02143	2.02143	up	0	CUST_9822_PI428311958	0	lncRNA	NA	"gi|281485574|ref|NR_033170.1| Rattus norvegicus tRNA-yW synthesizing protein 5 (Tyw5), transcript variant 2, non-coding RNA"	seq9923	NR_033170.1	NA	chr9	-	56283827	56302571_x000D_
CUST_91_PI428311958	5.42259	P	4.40923	A	2.01861	2.01861	up	0	CUST_91_PI428311958	0	lncRNA	NA	"chr13|mm9_knownGene_uc007cum.1| strand:+ 49162330-49162555,49162857-49163039,49165072-49165221,49165308-49165442,49165786-49165956,49166208-49166323,49167398-49167593,49169299-49169490,49170209-49170267,49170372-49170586,49170971-49171052,49171412-49171452,49171453-49171514,49172302-49172494,49183467-49183515,49185843-49185950,49186605-49186673,49187541-49187773,49187935-49188082,49188308-491885…	seq91	uc007cum.1	NA	chr13	+	49162330	49206513_x000D_
CUST_5239_PI428311958	6.72932	P	5.71752	P	2.01643	2.01643	up	0	CUST_5239_PI428311958	0	lncRNA	NA	rn4_all_mrna_FQ226271 range=chr5:47929217-47930733 5'pad=0 3'pad=0 strand=+ repeatMasking=none	seq5282	FQ226271	NA	chr5	+	47929217	47930733_x000D_
CUST_8790_PI428311958	6.6333	P	5.62243	P	2.01513	2.01513	up	0	CUST_8790_PI428311958	0	lncRNA	NA	rn4_all_mrna_FQ227734 range=chr18:64202233-64203120 5'pad=0 3'pad=0 strand=+ repeatMasking=none	seq8886	FQ227734	NA	chr18	+	64202233	64203120_x000D_
CUST_5371_PI428311958	9.94916	P	8.93857	P	2.01473	2.01473	up	0	CUST_5371_PI428311958	0	lncRNA	NA	rn4_all_mrna_FQ222777 range=chr5:130123829-130141608 5'pad=0 3'pad=0 strand=- repeatMasking=none	seq5416	FQ222777	NA	chr5	-	130123829	130141608_x000D_
CUST_9024_PI428311958	9.82879	P	8.81838	P	2.0145	2.0145	up	0	CUST_9024_PI428311958	0	lncRNA	NA	rn4_all_mrna_FQ232603 range=chr20:21230037-21231144 5'pad=0 3'pad=0 strand=+ repeatMasking=none	seq9123	FQ232603	NA	chr20	+	21230037	21231144_x000D_
CUST_413_PI428311958	5.3729	P	4.36281	A	2.01404	2.01404	up	0	CUST_413_PI428311958	0	lncRNA	NA	"chr8|gi|377835635|ref|XR_140952.1|| strand:+ 84826702-84826755,84826758-84826859,84826861-84826901,84826902-84827048,84827050-84827195,84827196-84827248,84827269-84827405,84827408-84827420,84827422-84827430,84827678-84827688,84827690-84827730,84827735-84827854,84827858-84828071,84828072-84828160,"	seq415	XR_140952.1	NA	chr8	+	84826702	84828160_x000D_
CUST_1123_PI428311958	10.1371	P	9.12753	P	2.01328	2.01328	up	0	CUST_1123_PI428311958	0	lncRNA	NA	"chr5|ri|1110014C07|R000016C14|944| strand:- 135321775-135321790,135321674-135321773,135321665-135321672,135321658-135321663,135321621-135321656,135321349-135321619,135321341-135321348,135321325-135321340,135321304-135321315,135321219-135321303,135321206-135321216,135321138-135321188,135321121-135321137,135321101-135321104,135321091-135321099,135321033-135321090,135320972-135321032,135320945-1353…	seq1126	R000016C14	NA	chr5	-	135320880	135321792_x000D_
CUST_9004_PI428311958	6.59645	P	5.59014	P	2.00877	2.00877	up	0	CUST_9004_PI428311958	0	lncRNA	NA	rn4_all_mrna_FQ233348 range=chr20:7685534-7687168 5'pad=0 3'pad=0 strand=+ repeatMasking=none	seq9103	FQ233348	NA	chr20	+	7685534	7687168_x000D_
CUST_9397_PI428311958	8.47342	P	7.46734	P	2.00844	2.00844	up	0	CUST_9397_PI428311958	0	lncRNA	NA	"gi|293349713|ref|XR_085909.1| PREDICTED: Rattus norvegicus hypothetical protein LOC685888 (LOC685888), miscRNA"	seq9498	XR_085909.1	NA	NA	NA	NA	NA_x000D_
CUST_1511_PI428311958	7.77145	P	6.76541	P	2.00838	2.00838	up	0	CUST_1511_PI428311958	0	lncRNA	NA	"chr5|ri|2310058O09|ZX00040B15|506| strand:- 169071954-169072067,169039521-169039635,169001463-169001585,169001310-169001461,"	seq1516	ZX00040B15	NA	chr5	-	169001312	169072064_x000D_
CUST_2420_PI428311958	5.67695	P	4.67092	A	2.00838	2.00838	up	0	CUST_2420_PI428311958	0	lncRNA	NA	"chr5|mm9_knownGene_uc012drc.1| strand:+ 172762159-172762379,172762547-172762652,172762737-172762855,172762957-172763277,172763281-172763344,172763354-172763372,172763373-172763392,172763399-172763450,172763473-172763533,172763534-172763561,172763584-172763675,172763677-172764081,172764082-172764366,172764369-172764437,"	seq2428	uc012drc.1	NA	chr5	+	172762160	172764432_x000D_
CUST_4406_PI428311958	6.64089	P	5.63583	P	2.00702	2.00702	up	0	CUST_4406_PI428311958	0	lncRNA	NA	rn4_all_mrna_AY169317 range=chr3:12574472-12576932 5'pad=0 3'pad=0 strand=- repeatMasking=none	seq4432	AY169317	NA	chr3	-	12574472	12576932_x000D_
CUST_2702_PI428311958	5.40979	P	4.40531	A	2.00622	2.00622	up	0	CUST_2702_PI428311958	0	lncRNA	NA	"chr10|ri|3110009M16|ZX00070H04|953| strand:+ 56679259-56679419,56679437-56679535,56679547-56679555,56679570-56679668,56679669-56679752,56679769-56679798,56679800-56679808,56679818-56679829,56679837-56679852,56679881-56679903,56679904-56680000,56680110-56680297,56680303-56680338,"	seq2711	ZX00070H04	NA	chr10	+	56679260	56680336_x000D_
CUST_1106_PI428311958	6.61637	P	5.61219	P	2.00579	2.00579	up	0	CUST_1106_PI428311958	0	lncRNA	NA	"chr14|gi|238018131|ref|NR_027710.1|| strand:+ 64278017-64278203,64283193-64283368,64331353-64331549,64333694-64333774,64333775-64333816,64334688-64334892,64338788-64338833,64338912-64339016,64352381-64353296,64353789-64353896,64354051-64354167,64365610-64365731,64366076-64366227,64367151-64367155,64370806-64370922,64370923-64371032,64371033-64371040,64371041-64371078,64371091-64371103,64371107-6…	seq1109	NR_027710.1	NA	chr14	+	64278016	64375376_x000D_
CUST_661_PI428311958	6.71411	P	5.71033	P	2.00525	2.00525	up	0	CUST_661_PI428311958	0	lncRNA	NA	"chr8|ri|9130209A03|PX00061O04|1660| strand:+ 11129910-11130161,11130162-11130190,11130191-11130266,11130267-11130281,11130283-11130326,11130329-11130336,11130343-11130376,11130386-11130406,11130407-11130411,11130413-11130460,11130475-11130709,11130713-11130893,11130916-11130990,11130992-11131562,"	seq664	PX00061O04	NA	chr8	+	11129910	11131562_x000D_
CUST_5214_PI428311958	5.63565	P	4.63239	A	2.00453	2.00453	up	0	CUST_5214_PI428311958	0	lncRNA	NA	rn4_all_mrna_BC085355 range=chr5:23387568-23389322 5'pad=0 3'pad=0 strand=+ repeatMasking=none	seq5257	BC085355	NA	chr5	+	23387568	23389322_x000D_
CUST_2277_PI428311958	6.81319	P	5.81029	P	2.00403	2.00403	up	0	CUST_2277_PI428311958	0	lncRNA	NA	"chr5|mm9_knownGene_uc012dic.1| strand:+ 128442656-128442772,128446880-128447056,128447405-128447584,"	seq2283	uc012dic.1	NA	chr5	+	128442656	128447584_x000D_
CUST_2286_PI428311958	8.69786	P	7.69522	P	2.00366	2.00366	up	0	CUST_2286_PI428311958	0	lncRNA	NA	"chr19|ri|D130045G19|PX00184I07|2479| strand:+ 38784984-38785048,38785049-38785079,38785082-38785190,38785192-38785258,38785259-38785283,38785287-38785384,38785392-38785440,38785442-38785454,38785455-38785586,38785601-38785737,38785742-38785778,38785780-38785794,38785796-38785962,38785963-38786023,38786026-38786072,38786074-38786185,38786186-38786280,38786281-38786321,38786325-38786335,38786338-3…	seq2292	PX00184I07	NA	chr19	+	38784984	38787296_x000D_
CUST_7713_PI428311958	6.74521	P	5.74319	P	2.00281	2.00281	up	0	CUST_7713_PI428311958	0	lncRNA	NA	rn4_all_mrna_FQ230095 range=chr13:57890923-57891822 5'pad=0 3'pad=0 strand=- repeatMasking=none	seq7791	FQ230095	NA	chr13	-	57890923	57891822_x000D_

## Sheet: DIO_VS_Normol_Down_516
ProbeName	Gaozhi_NS	Gaozhi_flags	ZhengC_NS	ZhengC_flags	foldchange	foldchange(abs)	Regulation	ControlType	ProbeName.1	ControlType.1	Classify	Gene_symbol	Description	Seq_id	Target_id	Target_id_1	Target_chr	Target_strand	Target_start	Target_end_x000D_
CUST_3471_PI428311958	2.45831	A	7.66187	P	0.0271376	36.8492	down	0	CUST_3471_PI428311958	0	lncRNA	NA	rn4_all_mrna_FQ214195 range=chr1:106381925-106383082 5'pad=0 3'pad=0 strand=+ repeatMasking=none	seq3484	FQ214195	NA	chr1	+	106381925	106383082_x000D_
CUST_458_PI428311958	2.53099	A	6.82523	P	0.050969	19.6198	down	0	CUST_458_PI428311958	0	lncRNA	NA	"chr3|gi|309267641|ref|XR_104673.1|| strand:+ 13314353-13314473,13327529-13327727,13327728-13327796,13327797-13327907,13327910-13327939,13327941-13328019,13328032-13328193,13328194-13328758,13328760-13328812,13328823-13328827,13328828-13328857,13328865-13329026,13329052-13329062,13329064-13329114,13329117-13329153,13329161-13329177,"	seq460	XR_104673.1	NA	chr3	+	13314353	13329177_x000D_
CUST_5519_PI428311958	2.46138	A	6.6979	P	0.0530491	18.8504	down	0	CUST_5519_PI428311958	0	lncRNA	NA	rn4_all_mrna_AY158661 range=chr6:138250041-138626992 5'pad=0 3'pad=0 strand=- repeatMasking=none	seq5568	AY158661	NA	chr6	-	138250041	138626992_x000D_
CUST_2111_PI428311958	2.66392	A	6.76401	P	0.058311	17.1494	down	0	CUST_2111_PI428311958	0	lncRNA	NA	"chr10|mm9_knownGene_uc007mon.2| strand:- 108075520-108075647,108074698-108074846,108074556-108074559,108070149-108070423,108069879-108070048,108069722-108069726,108069503-108069712,108069164-108069329,108066528-108066630,108065436-108065532,108065429-108065434,108065385-108065428,108064912-108065003,108063778-108063935,108063219-108063365,108062715-108062906,108056210-108056476,108054314-1080544…	seq2117	uc007mon.2	NA	chr10	-	108012024	108075648_x000D_
CUST_9135_PI428311958	4.20051	A	8.14719	P	0.064853	15.4195	down	0	CUST_9135_PI428311958	0	lncRNA	NA	rn4_all_mrna_FQ232417 range=chr2_random:34929-35951 5'pad=0 3'pad=0 strand=- repeatMasking=none	seq9236	FQ232417	NA	chr2_random	-	34929	35951_x000D_
CUST_8347_PI428311958	2.64305	A	6.48375	P	0.0697966	14.3274	down	0	CUST_8347_PI428311958	0	lncRNA	NA	rn4_all_mrna_BC158774 range=chr16:27579033-27586937 5'pad=0 3'pad=0 strand=- repeatMasking=none	seq8438	BC158774	NA	chr16	-	27579033	27586937_x000D_
CUST_2931_PI428311958	2.47937	A	6.23329	P	0.0741237	13.491	down	0	CUST_2931_PI428311958	0	lncRNA	NA	uc.194+	seq2940	uc.194+	NA	chr5	-	44862880	44863080_x000D_
CUST_4808_PI428311958	2.82638	A	6.50432	P	0.0781325	12.7988	down	0	CUST_4808_PI428311958	0	lncRNA	NA	rn4_all_mrna_FQ220567 range=chr4:15136454-15137579 5'pad=0 3'pad=0 strand=- repeatMasking=none	seq4840	FQ220567	NA	chr4	-	15136454	15137579_x000D_
CUST_6638_PI428311958	11.6202	P	15.2214	P	0.0823998	12.136	down	0	CUST_6638_PI428311958	0	lncRNA	NA	rn4_all_mrna_BC058491 range=chr9:72016130-72016485 5'pad=0 3'pad=0 strand=- repeatMasking=none	seq6704	BC058491	NA	chr9	-	72016130	72016485_x000D_
CUST_4899_PI428311958	2.54452	A	6.13249	P	0.0831601	12.025	down	0	CUST_4899_PI428311958	0	lncRNA	NA	rn4_all_mrna_AF188753 range=chr4:75915356-75915614 5'pad=0 3'pad=0 strand=+ repeatMasking=none	seq4933	AF188753	NA	chr4	+	75915356	75915614_x000D_
CUST_396_PI428311958	6.01156	P	9.56584	P	0.0851248	11.7475	down	0	CUST_396_PI428311958	0	lncRNA	NA	"chr19|mm9_knownGene_uc009lbc.1| strand:+ 2333795-2333867,2333876-2334008,2334033-2334194,2338045-2338340,2341190-2341313,2343021-2343186,2346490-2346526,2346527-2346651,"	seq398	uc009lbc.1	NA	chr19	+	2333795	2346651_x000D_
CUST_8936_PI428311958	4.01623	A	7.53385	P	0.0873153	11.4527	down	0	CUST_8936_PI428311958	0	lncRNA	NA	rn4_all_mrna_FQ211944 range=chr19:54021496-54039069 5'pad=0 3'pad=0 strand=- repeatMasking=none	seq9034	FQ211944	NA	chr19	-	54021496	54039069_x000D_
CUST_6637_PI428311958	11.7145	P	15.2148	P	0.0883747	11.3155	down	0	CUST_6637_PI428311958	0	lncRNA	NA	rn4_all_mrna_AF139830 range=chr9:71999804-72003902 5'pad=0 3'pad=0 strand=- repeatMasking=none	seq6703	AF139830	NA	chr9	-	71999804	72003902_x000D_
CUST_8558_PI428311958	3.64155	A	7.13651	P	0.0886978	11.2742	down	0	CUST_8558_PI428311958	0	lncRNA	NA	rn4_all_mrna_FQ227799 range=chr17:47706582-47707753 5'pad=0 3'pad=0 strand=- repeatMasking=none	seq8650	FQ227799	NA	chr17	-	47706582	47707753_x000D_
CUST_6993_PI428311958	2.45875	A	5.94205	P	0.0894172	11.1835	down	0	CUST_6993_PI428311958	0	lncRNA	NA	rn4_all_mrna_FQ225939 range=chr10:17379660-17380724 5'pad=0 3'pad=0 strand=+ repeatMasking=none	seq7066	FQ225939	NA	chr10	+	17379660	17380724_x000D_
CUST_4393_PI428311958	2.66123	A	6.11873	P	0.0910314	10.9852	down	0	CUST_4393_PI428311958	0	lncRNA	NA	rn4_all_mrna_FQ232572 range=chr3:11106153-11108270 5'pad=0 3'pad=0 strand=+ repeatMasking=none	seq4419	FQ232572	NA	chr3	+	11106153	11108270_x000D_
CUST_8371_PI428311958	2.57746	A	5.98289	P	0.0943765	10.5959	down	0	CUST_8371_PI428311958	0	lncRNA	NA	rn4_all_mrna_FQ221934 range=chr16:55188606-55189733 5'pad=0 3'pad=0 strand=- repeatMasking=none	seq8462	FQ221934	NA	chr16	-	55188606	55189733_x000D_
CUST_8040_PI428311958	2.59751	A	5.82533	P	0.10674	9.36853	down	0	CUST_8040_PI428311958	0	lncRNA	NA	rn4_all_mrna_BC099225 range=chr15:31701968-32209984 5'pad=0 3'pad=0 strand=+ repeatMasking=none	seq8125	BC099225	NA	chr15	+	31701968	32209984_x000D_
CUST_887_PI428311958	2.90102	A	6.12828	P	0.106781	9.36493	down	0	CUST_887_PI428311958	0	lncRNA	NA	"chrX|ri|2310066B14|ZX00040N05|726| strand:- 101224488-101224591,101222103-101222249,101222076-101222095,101222050-101222067,101222028-101222045,101222023-101222027,101221915-101222022,101221910-101221913,101221863-101221908,101221842-101221850,101221811-101221840,101221655-101221797,"	seq890	ZX00040N05	NA	chrX	-	101221655	101224591_x000D_
CUST_1425_PI428311958	8.57664	P	11.7331	P	0.112155	8.91622	down	0	CUST_1425_PI428311958	0	lncRNA	NA	"chr20|mm9_knownGene_uc008cdl.2| strand:+ 4106095-4106136,4106137-4106229,4106335-4106527,4107051-4107252,4107456-4107526,4107606-4107694,4302367-4302449,4302556-4302655,4303197-4303287,4303389-4303523,4303841-4303957,4304054-4304221,4304369-4304495,4304497-4304500,4304501-4304542,4304640-4304825,4305500-4305658,4305960-4306086,4306434-4306436,4306442-4306513,4306765-4306945,4307073-4307172,43072…	seq1430	uc008cdl.2	NA	chr20	+	4106095	4315878_x000D_
CUST_5558_PI428311958	2.67556	A	5.83148	P	0.112196	8.91301	down	0	CUST_5558_PI428311958	0	lncRNA	NA	rn4_all_mrna_FQ211598 range=chr6:147555440-147619485 5'pad=0 3'pad=0 strand=+ repeatMasking=none	seq5608	FQ211598	NA	chr6	+	147555440	147619485_x000D_
CUST_4772_PI428311958	4.29038	A	7.37306	P	0.118037	8.47189	down	0	CUST_4772_PI428311958	0	lncRNA	NA	rn4_all_mrna_FQ212809 range=chr4:81911425-81951026 5'pad=0 3'pad=0 strand=+ repeatMasking=none	seq4803	FQ212809	NA	chr4	+	81911425	81951026_x000D_
CUST_2989_PI428311958	2.47912	A	5.51454	P	0.121968	8.19885	down	0	CUST_2989_PI428311958	0	lncRNA	NA	uc.255+	seq2998	uc.255+	NA	chr5	+	111180520	111180752_x000D_
CUST_2963_PI428311958	2.68385	A	5.71168	P	0.122612	8.15583	down	0	CUST_2963_PI428311958	0	lncRNA	NA	uc.229+	seq2972	uc.229+	NA	chr4	+	41872200	41872496_x000D_
CUST_2786_PI428311958	2.47842	A	5.45525	P	0.127024	7.87252	down	0	CUST_2786_PI428311958	0	lncRNA	NA	uc.42+	seq2795	uc.42+	NA	chr13	-	105035272	105035536_x000D_
CUST_4482_PI428311958	4.64262	A	7.61894	P	0.127068	7.86977	down	0	CUST_4482_PI428311958	0	lncRNA	NA	rn4_all_mrna_U78517 range=chr3:54682546-54717147 5'pad=0 3'pad=0 strand=+ repeatMasking=none	seq4509	U78517	NA	chr3	+	54682546	54717147_x000D_
CUST_9842_PI428311958	15.5002	P	18.4637	P	0.128208	7.79984	down	0	CUST_9842_PI428311958	0	lncRNA	NA	"gi|374429560|ref|NR_046239.1| Rattus norvegicus 45S pre-ribosomal RNA (Rn45s), ribosomal RNA"	seq9943	NR_046239.1	NA	chrUn	+	23403705	23415652_x000D_
CUST_8955_PI428311958	10.4811	P	13.4214	P	0.130277	7.67595	down	0	CUST_8955_PI428311958	0	lncRNA	NA	rn4_all_mrna_AY325253 range=chr20:4049958-4077745 5'pad=0 3'pad=0 strand=+ repeatMasking=none	seq9054	AY325253	NA	chr20	+	4049958	4077745_x000D_
CUST_7631_PI428311958	2.52276	A	5.44285	P	0.132119	7.56892	down	0	CUST_7631_PI428311958	0	lncRNA	NA	rn4_all_mrna_BC091332 range=chr12:45197705-45199041 5'pad=0 3'pad=0 strand=- repeatMasking=none	seq7708	BC091332	NA	chr12	-	45197705	45199041_x000D_
CUST_5654_PI428311958	2.49872	A	5.41632	P	0.132348	7.55586	down	0	CUST_5654_PI428311958	0	lncRNA	NA	rn4_all_mrna_FQ234077 range=chr6:53445185-53446547 5'pad=0 3'pad=0 strand=- repeatMasking=none	seq5704	FQ234077	NA	chr6	-	53445185	53446547_x000D_
CUST_1986_PI428311958	2.81274	A	5.72451	P	0.132883	7.5254	down	0	CUST_1986_PI428311958	0	lncRNA	NA	"chr6|gi|299758515|ref|NR_033813.1|| strand:+ 134021313-134021335,134021340-134021375,134021376-134021379,134021381-134021633,134021636-134021647,134021648-134021788,134022079-134022218,134023466-134023531,134023992-134024113,134024690-134024693,134026731-134026868,134028238-134028342,134028344-134028992,134028994-134029006,134029007-134029037,134041429-134041436,134041437-134041498,134041501-134…	seq1992	NR_033813.1	NA	chr6	+	134021312	134044144_x000D_
CUST_2637_PI428311958	4.51743	A	7.39662	P	0.135918	7.35739	down	0	CUST_2637_PI428311958	0	lncRNA	NA	"chr1|mm9_knownGene_uc008hxj.1| strand:- 261408032-261408037,261407460-261407615,261406553-261406558,261401467-261401591,261400077-261400199,261398232-261398305,261395555-261395658,261395545-261395551,261393223-261393372,261391898-261391994,261391212-261391348,261388039-261388138,261387546-261387759,261385179-261385289,261384980-261385065,261383585-261383666,261382535-261382605,261381643-26138190…	seq2646	uc008hxj.1	NA	chr1	-	261370016	261408032_x000D_
CUST_9726_PI428311958	2.45201	A	5.3275	P	0.136267	7.33855	down	0	CUST_9726_PI428311958	0	lncRNA	NA	"gi|295852190|ref|XR_086070.2| PREDICTED: Rattus norvegicus similar to WAC (RGD1562407), miscRNA"	seq9827	XR_086070.2	NA	NA	NA	NA	NA_x000D_
CUST_1531_PI428311958	2.67779	A	5.55262	P	0.136329	7.33517	down	0	CUST_1531_PI428311958	0	lncRNA	NA	"chr5|gi|294997233|ref|NR_002862.3|| strand:- 142614983-142615002,142614939-142614982,142614934-142614938,142614902-142614932,142614845-142614895,142614779-142614844,142614703-142614775,142614112-142614200,142613711-142613841,142613532-142613625,142611878-142611952,142611871-142611876,142611837-142611858,142611643-142611729,142611095-142611166,142610879-142610969,142610826-142610829,142610376-142…	seq1536	NR_002862.3	NA	chr5	-	142599248	142615008_x000D_
CUST_1162_PI428311958	3.00895	A	5.88219	P	0.13648	7.32709	down	0	CUST_1162_PI428311958	0	lncRNA	NA	"chr17|gi|377835988|ref|XR_105555.2|| strand:- 15605026-15605061,15605000-15605019,15604948-15604994,15604193-15604942,"	seq1165	XR_105555.2	NA	chr17	-	15604193	15605061_x000D_
CUST_7257_PI428311958	2.88609	A	5.75169	P	0.137204	7.28843	down	0	CUST_7257_PI428311958	0	lncRNA	NA	rn4_all_mrna_FQ232967 range=chr10:88112667-88113729 5'pad=0 3'pad=0 strand=- repeatMasking=none	seq7332	FQ232967	NA	chr10	-	88112667	88113729_x000D_
CUST_7878_PI428311958	4.63575	A	7.48842	P	0.13844	7.22335	down	0	CUST_7878_PI428311958	0	lncRNA	NA	rn4_all_mrna_FQ225676 range=chr14:10322058-10322958 5'pad=0 3'pad=0 strand=+ repeatMasking=none	seq7960	FQ225676	NA	chr14	+	10322058	10322958_x000D_
CUST_4095_PI428311958	2.41391	A	5.22987	P	0.142007	7.04189	down	0	CUST_4095_PI428311958	0	lncRNA	NA	rn4_all_mrna_BC107462 range=chr2:155462121-155522725 5'pad=0 3'pad=0 strand=+ repeatMasking=none	seq4118	BC107462	NA	chr2	+	155462121	155522725_x000D_
CUST_4554_PI428311958	2.5234	A	5.33835	P	0.142106	7.03698	down	0	CUST_4554_PI428311958	0	lncRNA	NA	rn4_all_mrna_D38450 range=chr3:104699853-104706835 5'pad=0 3'pad=0 strand=- repeatMasking=none	seq4581	D38450	NA	chr3	-	104699853	104706835_x000D_
CUST_7785_PI428311958	4.82616	A	7.63037	P	0.143169	6.98475	down	0	CUST_7785_PI428311958	0	lncRNA	NA	rn4_all_mrna_FQ230932 range=chr13:86928397-86929684 5'pad=0 3'pad=0 strand=- repeatMasking=none	seq7863	FQ230932	NA	chr13	-	86928397	86929684_x000D_
CUST_7435_PI428311958	3.53749	A	6.31289	P	0.146056	6.84667	down	0	CUST_7435_PI428311958	0	lncRNA	NA	rn4_all_mrna_FQ231476 range=chr11:60372165-60373394 5'pad=0 3'pad=0 strand=- repeatMasking=none	seq7511	FQ231476	NA	chr11	-	60372165	60373394_x000D_
CUST_9639_PI428311958	2.83075	A	5.58827	P	0.147878	6.76232	down	0	CUST_9639_PI428311958	0	lncRNA	NA	"gi|295851894|ref|XR_085848.2| PREDICTED: Rattus norvegicus hypothetical LOC100366213 (LOC100366213), miscRNA"	seq9740	XR_085848.2	NA	NA	NA	NA	NA_x000D_
CUST_3306_PI428311958	4.83326	A	7.59061	P	0.147896	6.76151	down	0	CUST_3306_PI428311958	0	lncRNA	NA	rn4_all_mrna_FQ212396 range=chr1:30063546-30064671 5'pad=0 3'pad=0 strand=- repeatMasking=none	seq3318	FQ212396	NA	chr1	-	30063546	30064671_x000D_
CUST_6785_PI428311958	2.43258	A	5.18051	P	0.148865	6.71752	down	0	CUST_6785_PI428311958	0	lncRNA	NA	rn4_all_mrna_FQ213313 range=chrX:34728800-34729566 5'pad=0 3'pad=0 strand=- repeatMasking=none	seq6853	FQ213313	NA	chrX	-	34728800	34729566_x000D_
CUST_7331_PI428311958	11.5243	P	14.2309	P	0.15319	6.52784	down	0	CUST_7331_PI428311958	0	lncRNA	NA	rn4_all_mrna_FQ232561 range=chr10:108309514-108310416 5'pad=0 3'pad=0 strand=- repeatMasking=none	seq7407	FQ232561	NA	chr10	-	108309514	108310416_x000D_
CUST_8476_PI428311958	2.85012	A	5.5557	P	0.1533	6.52316	down	0	CUST_8476_PI428311958	0	lncRNA	NA	rn4_all_mrna_BC087670 range=chr17:14922067-14935949 5'pad=0 3'pad=0 strand=- repeatMasking=none	seq8567	BC087670	NA	chr17	-	14922067	14935949_x000D_
CUST_3678_PI428311958	8.9834	P	11.6822	P	0.154017	6.4928	down	0	CUST_3678_PI428311958	0	lncRNA	NA	rn4_all_mrna_FQ220935 range=chr1:208469185-208471902 5'pad=0 3'pad=0 strand=- repeatMasking=none	seq3695	FQ220935	NA	chr1	-	208469185	208471902_x000D_
CUST_3159_PI428311958	2.45839	A	5.1465	P	0.155167	6.44469	down	0	CUST_3159_PI428311958	0	lncRNA	NA	uc.431+	seq3168	uc.431+	NA	chr18	+	17653894	17654124_x000D_
CUST_2825_PI428311958	2.40546	A	5.08752	P	0.155819	6.41772	down	0	CUST_2825_PI428311958	0	lncRNA	NA	uc.83+	seq2834	uc.83+	NA	chr3	+	38609000	38609296_x000D_
CUST_8164_PI428311958	2.60625	A	5.28659	P	0.156004	6.41007	down	0	CUST_8164_PI428311958	0	lncRNA	NA	rn4_all_mrna_FQ226531 range=chr15:38493600-38494288 5'pad=0 3'pad=0 strand=- repeatMasking=none	seq8251	FQ226531	NA	chr15	-	38493600	38494288_x000D_
CUST_9381_PI428311958	9.28072	P	11.9268	P	0.159757	6.2595	down	0	CUST_9381_PI428311958	0	lncRNA	NA	"gi|293348804|ref|XR_085883.1| PREDICTED: Rattus norvegicus apolipoprotein L 11a (Apol11a), partial miscRNA"	seq9482	XR_085883.1	NA	NA	NA	NA	NA_x000D_
CUST_9465_PI428311958	3.23964	A	5.88193	P	0.160174	6.24322	down	0	CUST_9465_PI428311958	0	lncRNA	NA	"gi|293357527|ref|XR_086184.1| PREDICTED: Rattus norvegicus amylase 2-2, pancreatic (Amy2-2), miscRNA"	seq9566	XR_086184.1	NA	NA	NA	NA	NA_x000D_
CUST_7876_PI428311958	7.17378	P	9.81373	P	0.160433	6.23312	down	0	CUST_7876_PI428311958	0	lncRNA	NA	rn4_all_mrna_FQ234951 range=chr14:10302693-10304173 5'pad=0 3'pad=0 strand=+ repeatMasking=none	seq7958	FQ234951	NA	chr14	+	10302693	10304173_x000D_
CUST_5351_PI428311958	2.59475	A	5.22611	P	0.161391	6.19614	down	0	CUST_5351_PI428311958	0	lncRNA	NA	rn4_all_mrna_JQ288997 range=chr5:123517627-123523935 5'pad=0 3'pad=0 strand=+ repeatMasking=none	seq5396	JQ288997	NA	chr5	+	123517627	123523935_x000D_
CUST_1655_PI428311958	8.14767	P	10.7404	P	0.165766	6.03259	down	0	CUST_1655_PI428311958	0	lncRNA	NA	"chr16|ri|1110004H09|R000013F13|1432| strand:- 39672096-39672179,39672053-39672095,39671867-39672052,39671618-39671866,39671557-39671616,39671378-39671556,39671159-39671377,39671108-39671157,39671068-39671106,39670757-39671066,"	seq1661	R000013F13	NA	chr16	-	39670756	39672180_x000D_
CUST_6184_PI428311958	6.74878	P	9.32894	P	0.167222	5.98007	down	0	CUST_6184_PI428311958	0	lncRNA	NA	rn4_all_mrna_BC092625 range=chr8:82108897-82200533 5'pad=0 3'pad=0 strand=- repeatMasking=none	seq6245	BC092625	NA	chr8	-	82108897	82200533_x000D_
CUST_7037_PI428311958	3.9069	A	6.48157	P	0.167859	5.95738	down	0	CUST_7037_PI428311958	0	lncRNA	NA	rn4_all_mrna_FQ215938 range=chr10:35320745-35322305 5'pad=0 3'pad=0 strand=+ repeatMasking=none	seq7110	FQ215938	NA	chr10	+	35320745	35322305_x000D_
CUST_1634_PI428311958	10.5183	P	13.0739	P	0.1701	5.8789	down	0	CUST_1634_PI428311958	0	lncRNA	NA	"chr10|ri|1110003F11|R000013M10|378| strand:+ 71969944-71970065,71972192-71972265,71975667-71975690,71975695-71975753,71975767-71975811,"	seq1640	R000013M10	NA	chr10	+	71969944	71975808_x000D_
CUST_8559_PI428311958	5.40233	P	7.94427	P	0.171711	5.82374	down	0	CUST_8559_PI428311958	0	lncRNA	NA	rn4_all_mrna_FQ225656 range=chr17:47707251-47708385 5'pad=0 3'pad=0 strand=- repeatMasking=none	seq8651	FQ225656	NA	chr17	-	47707251	47708385_x000D_
CUST_2762_PI428311958	4.17026	A	6.69484	P	0.17379	5.75405	down	0	CUST_2762_PI428311958	0	lncRNA	NA	uc.17+	seq2771	uc.17+	NA	chr5	-	143712496	143712736_x000D_
CUST_8658_PI428311958	3.58361	A	6.02308	P	0.184351	5.42443	down	0	CUST_8658_PI428311958	0	lncRNA	NA	rn4_all_mrna_FQ217083 range=chr18:57780141-57832576 5'pad=0 3'pad=0 strand=- repeatMasking=none	seq8751	FQ217083	NA	chr18	-	57780141	57832576_x000D_
CUST_8557_PI428311958	7.15234	P	9.5823	P	0.185571	5.38876	down	0	CUST_8557_PI428311958	0	lncRNA	NA	rn4_all_mrna_FQ233799 range=chr17:47701232-47701851 5'pad=0 3'pad=0 strand=- repeatMasking=none	seq8649	FQ233799	NA	chr17	-	47701232	47701851_x000D_
CUST_532_PI428311958	3.88008	A	6.2818	P	0.189239	5.28431	down	0	CUST_532_PI428311958	0	lncRNA	NA	"chrX|mm9_knownGene_uc012hfu.1| strand:- 8129228-8129256,8128896-8129226,8121483-8121720,8116891-8117063,8097569-8097705,8096177-8096334,"	seq534	uc012hfu.1	NA	chrX	-	8096177	8129256_x000D_
CUST_9709_PI428311958	9.2761	P	11.6704	P	0.190209	5.25739	down	0	CUST_9709_PI428311958	0	lncRNA	NA	"gi|295852103|ref|XR_086007.2| PREDICTED: Rattus norvegicus Low affinity immunoglobulin gamma Fc region receptor III-like (LOC100362543), miscRNA"	seq9810	XR_086007.2	NA	NA	NA	NA	NA_x000D_
CUST_7332_PI428311958	7.28448	P	9.66751	P	0.191706	5.21633	down	0	CUST_7332_PI428311958	0	lncRNA	NA	rn4_all_mrna_FQ213090 range=chr10:108491807-108493206 5'pad=0 3'pad=0 strand=- repeatMasking=none	seq7408	FQ213090	NA	chr10	-	108491807	108493206_x000D_
CUST_6188_PI428311958	6.3738	P	8.7532	P	0.19219	5.20319	down	0	CUST_6188_PI428311958	0	lncRNA	NA	rn4_all_mrna_FQ211602 range=chr8:104170088-104216895 5'pad=0 3'pad=0 strand=- repeatMasking=none	seq6249	FQ211602	NA	chr8	-	104170088	104216895_x000D_
CUST_7104_PI428311958	7.05824	P	9.43636	P	0.19236	5.19857	down	0	CUST_7104_PI428311958	0	lncRNA	NA	rn4_all_mrna_BC107933 range=chr10:51313486-51319999 5'pad=0 3'pad=0 strand=- repeatMasking=none	seq7177	BC107933	NA	chr10	-	51313486	51319999_x000D_
CUST_8669_PI428311958	7.17219	P	9.54305	P	0.19333	5.17249	down	0	CUST_8669_PI428311958	0	lncRNA	NA	rn4_all_mrna_FQ227285 range=chr18:2534313-2535397 5'pad=0 3'pad=0 strand=+ repeatMasking=none	seq8762	FQ227285	NA	chr18	+	2534313	2535397_x000D_
CUST_2173_PI428311958	3.91894	A	6.28397	P	0.194114	5.15161	down	0	CUST_2173_PI428311958	0	lncRNA	NA	"chr1|mm9_knownGene_uc009idu.1| strand:- 140010189-140010232,139978287-139978699,139952605-139952713,139947444-139947571,139946926-139946930,139946041-139946077,139945971-139946039,139945963-139945967,139945927-139945957,139945706-139945762,139945532-139945704,139945187-139945473,139943304-139943421,139940002-139940075,139938548-139938764,139935601-139935718,139931542-139931674,139927950-13992803…	seq2179	uc009idu.1	NA	chr1	-	139925648	140010240_x000D_
CUST_9476_PI428311958	3.93779	A	6.29268	P	0.195483	5.11553	down	0	CUST_9476_PI428311958	0	lncRNA	NA	"gi|293359285|ref|XR_006055.2| PREDICTED: Rattus norvegicus similar to major urinary protein 5 (LOC685577), miscRNA"	seq9577	XR_006055.2	NA	NA	NA	NA	NA_x000D_
CUST_6196_PI428311958	3.28624	A	5.63625	P	0.196145	5.09827	down	0	CUST_6196_PI428311958	0	lncRNA	NA	rn4_all_mrna_FQ234472 range=chr8:10268342-10269377 5'pad=0 3'pad=0 strand=+ repeatMasking=none	seq6257	FQ234472	NA	chr8	+	10268342	10269377_x000D_
CUST_3723_PI428311958	9.31201	P	11.6539	P	0.197246	5.0698	down	0	CUST_3723_PI428311958	0	lncRNA	NA	rn4_all_mrna_FQ225197 range=chr1:224575987-224577630 5'pad=0 3'pad=0 strand=- repeatMasking=none	seq3740	FQ225197	NA	chr1	-	224575987	224577630_x000D_
CUST_1311_PI428311958	4.48883	A	6.829	P	0.197487	5.06362	down	0	CUST_1311_PI428311958	0	lncRNA	NA	"chr13|gi|254588094|ref|NR_028111.1|| strand:+ 75458246-75458289,75458290-75458421,75458422-75458556,75458559-75458614,75487878-75487962,75488107-75488110,75488632-75488670,75488684-75488761,75488763-75489093,75489095-75489538,75489556-75489687,75489688-75489708,75489764-75489791,75489808-75489813,75489815-75489822,75489823-75489892,75489901-75489954,75489961-75489995,75489996-75490010,"	seq1315	NR_028111.1	NA	chr13	+	75458248	75490008_x000D_
CUST_8555_PI428311958	5.73901	P	8.07768	P	0.197693	5.05836	down	0	CUST_8555_PI428311958	0	lncRNA	NA	rn4_all_mrna_FQ230815 range=chr17:47659388-47659947 5'pad=0 3'pad=0 strand=- repeatMasking=none	seq8647	FQ230815	NA	chr17	-	47659388	47659947_x000D_
CUST_5367_PI428311958	4.86137	A	7.19829	P	0.197932	5.05224	down	0	CUST_5367_PI428311958	0	lncRNA	NA	rn4_all_mrna_AY539911 range=chr5:129123053-129165810 5'pad=0 3'pad=0 strand=- repeatMasking=none	seq5412	AY539911	NA	chr5	-	129123053	129165810_x000D_
CUST_5393_PI428311958	3.56547	A	5.90165	P	0.198033	5.04965	down	0	CUST_5393_PI428311958	0	lncRNA	NA	rn4_all_mrna_AJ973123 range=chr5:137443130-137443620 5'pad=0 3'pad=0 strand=+ repeatMasking=none	seq5438	AJ973123	NA	chr5	+	137443130	137443620_x000D_
CUST_6185_PI428311958	5.43906	P	7.75542	P	0.200773	4.98074	down	0	CUST_6185_PI428311958	0	lncRNA	NA	rn4_all_mrna_FQ224108 range=chr8:82108897-82311157 5'pad=0 3'pad=0 strand=- repeatMasking=none	seq6246	FQ224108	NA	chr8	-	82108897	82311157_x000D_
CUST_6580_PI428311958	5.28394	A	7.59625	P	0.201338	4.96677	down	0	CUST_6580_PI428311958	0	lncRNA	NA	rn4_all_mrna_FQ231527 range=chr9:37395355-37396479 5'pad=0 3'pad=0 strand=- repeatMasking=none	seq6645	FQ231527	NA	chr9	-	37395355	37396479_x000D_
CUST_4160_PI428311958	4.33992	A	6.63798	P	0.203337	4.91795	down	0	CUST_4160_PI428311958	0	lncRNA	NA	rn4_all_mrna_BC081831 range=chr2:182734494-182740192 5'pad=0 3'pad=0 strand=- repeatMasking=none	seq4183	BC081831	NA	chr2	-	182734494	182740192_x000D_
CUST_2877_PI428311958	8.7187	P	11.0118	P	0.204033	4.90117	down	0	CUST_2877_PI428311958	0	lncRNA	NA	uc.136+	seq2886	uc.136+	NA	chr2	-	117531720	117532072_x000D_
CUST_7840_PI428311958	3.4653	A	5.73536	P	0.207322	4.82342	down	0	CUST_7840_PI428311958	0	lncRNA	NA	rn4_all_mrna_FQ221372 range=chr14:47168597-47229692 5'pad=0 3'pad=0 strand=- repeatMasking=none	seq7921	FQ221372	NA	chr14	-	47168597	47229692_x000D_
CUST_2308_PI428311958	4.46437	A	6.72863	P	0.208157	4.80407	down	0	CUST_2308_PI428311958	0	lncRNA	NA	"chr14|mm9_knownGene_uc008xeh.2| strand:- 80623941-80624121,80584622-80584765,80580566-80580744,80575747-80575862,80574054-80574181,80571248-80571250,80571137-80571226,80558906-80558994,80554976-80555032,80550207-80550283,80546408-80546557,80542157-80542277,80540028-80540126,80535107-80535208,80534421-80534474,80526818-80526870,80526052-80526190,80511235-80511289,80509838-80509845,80509565-805096…	seq2314	uc008xeh.2	NA	chr14	-	80499016	80624120_x000D_
CUST_4913_PI428311958	3.00561	A	5.26277	P	0.209183	4.78051	down	0	CUST_4913_PI428311958	0	lncRNA	NA	rn4_all_mrna_FQ231123 range=chr4:80991547-80992440 5'pad=0 3'pad=0 strand=+ repeatMasking=none	seq4947	FQ231123	NA	chr4	+	80991547	80992440_x000D_
CUST_4747_PI428311958	4.62859	A	6.8611	P	0.212788	4.69952	down	0	CUST_4747_PI428311958	0	lncRNA	NA	rn4_all_mrna_BC088211 range=chr4:68802611-69243639 5'pad=0 3'pad=0 strand=+ repeatMasking=none	seq4777	BC088211	NA	chr4	+	68802611	69243639_x000D_
CUST_8556_PI428311958	6.77191	P	9.00169	P	0.213192	4.69061	down	0	CUST_8556_PI428311958	0	lncRNA	NA	rn4_all_mrna_FQ230998 range=chr17:47697617-47698586 5'pad=0 3'pad=0 strand=- repeatMasking=none	seq8648	FQ230998	NA	chr17	-	47697617	47698586_x000D_
CUST_7526_PI428311958	8.40479	P	10.6162	P	0.215927	4.6312	down	0	CUST_7526_PI428311958	0	lncRNA	NA	rn4_all_mrna_FQ220412 range=chr12:6104387-6105508 5'pad=0 3'pad=0 strand=- repeatMasking=none	seq7602	FQ220412	NA	chr12	-	6104387	6105508_x000D_
CUST_5167_PI428311958	6.0742	P	8.27966	P	0.216815	4.61222	down	0	CUST_5167_PI428311958	0	lncRNA	NA	rn4_all_mrna_AF202732 range=chr5:122960641-123533899 5'pad=0 3'pad=0 strand=+ repeatMasking=none	seq5207	AF202732	NA	chr5	+	122960641	123533899_x000D_
CUST_455_PI428311958	8.58229	P	10.7823	P	0.217641	4.59473	down	0	CUST_455_PI428311958	0	lncRNA	NA	"chr1|ri|1110004P15|R000015H09|626| strand:+ 211691797-211691817,211691818-211691826,211691827-211691838,211691839-211691936,211691939-211691952,211691955-211692051,211692061-211692101,211692103-211692236,211692238-211692314,211692315-211692424,"	seq457	R000015H09	NA	chr1	+	211691797	211692424_x000D_
CUST_4477_PI428311958	7.84871	P	10.0472	P	0.217865	4.58999	down	0	CUST_4477_PI428311958	0	lncRNA	NA	rn4_all_mrna_FQ229166 range=chr3:53409069-53410007 5'pad=0 3'pad=0 strand=+ repeatMasking=none	seq4504	FQ229166	NA	chr3	+	53409069	53410007_x000D_
CUST_626_PI428311958	3.66406	A	5.86065	P	0.218152	4.58395	down	0	CUST_626_PI428311958	0	lncRNA	NA	"chr11|ri|6820412M08|PX00704B24|1280| strand:- 60164368-60164377,60164335-60164367,60164229-60164333,60164155-60164185,60164079-60164129,60164012-60164078,60163992-60164010,60163942-60163991,60163823-60163935,60163789-60163817,60163763-60163781,60163728-60163762,60163723-60163727,60163665-60163721,60163657-60163663,60163600-60163643,60163524-60163598,60163416-60163522,60163299-60163415,60163267-6…	seq628	PX00704B24	NA	chr11	-	60163035	60164377_x000D_
CUST_7996_PI428311958	5.23665	A	7.39987	P	0.223258	4.47913	down	0	CUST_7996_PI428311958	0	lncRNA	NA	rn4_all_mrna_FQ210224 range=chr14:97789353-97793553 5'pad=0 3'pad=0 strand=+ repeatMasking=none	seq8079	FQ210224	NA	chr14	+	97789353	97793553_x000D_
CUST_5261_PI428311958	6.72596	P	8.87758	P	0.22506	4.44325	down	0	CUST_5261_PI428311958	0	lncRNA	NA	rn4_all_mrna_FQ211775 range=chr5:59421771-59429635 5'pad=0 3'pad=0 strand=+ repeatMasking=none	seq5304	FQ211775	NA	chr5	+	59421771	59429635_x000D_
CUST_7594_PI428311958	4.46546	A	6.60644	P	0.226727	4.4106	down	0	CUST_7594_PI428311958	0	lncRNA	NA	rn4_all_mrna_FQ213561 range=chr12:33138329-33154012 5'pad=0 3'pad=0 strand=+ repeatMasking=none	seq7670	FQ213561	NA	chr12	+	33138329	33154012_x000D_
CUST_805_PI428311958	4.08481	A	6.21847	P	0.227878	4.38831	down	0	CUST_805_PI428311958	0	lncRNA	NA	"chr6|mm9_knownGene_uc007phn.1| strand:+ 143566610-143567060,143599627-143599668,143600552-143600682,143603478-143603557,143608832-143608900,143609107-143609195,143610080-143610083,143622659-143622711,143627393-143627399,143628001-143628117,143630457-143630664,143631860-143631942,143634846-143634894,143636052-143636141,143636600-143636695,143642604-143642659,143644969-143645008,143645009-14364502…	seq808	uc007phn.1	NA	chr6	+	143566610	143659262_x000D_
CUST_4909_PI428311958	7.5424	P	9.66126	P	0.23023	4.34349	down	0	CUST_4909_PI428311958	0	lncRNA	NA	rn4_all_mrna_L03556 range=chr4:80502316-80504232 5'pad=0 3'pad=0 strand=- repeatMasking=none	seq4943	L03556	NA	chr4	-	80502316	80504232_x000D_
CUST_8392_PI428311958	8.39506	P	10.5082	P	0.231146	4.32627	down	0	CUST_8392_PI428311958	0	lncRNA	NA	rn4_all_mrna_FQ229380 range=chr16:70869228-70870361 5'pad=0 3'pad=0 strand=- repeatMasking=none	seq8483	FQ229380	NA	chr16	-	70869228	70870361_x000D_
CUST_5489_PI428311958	4.10745	A	6.21647	P	0.231805	4.31398	down	0	CUST_5489_PI428311958	0	lncRNA	NA	rn4_all_mrna_AF155823 range=chr5:166308730-166309480 5'pad=0 3'pad=0 strand=- repeatMasking=none	seq5536	AF155823	NA	chr5	-	166308730	166309480_x000D_
CUST_5348_PI428311958	6.42986	P	8.52693	P	0.233733	4.27839	down	0	CUST_5348_PI428311958	0	lncRNA	NA	rn4_all_mrna_L27058 range=chr5:123497144-123533832 5'pad=0 3'pad=0 strand=+ repeatMasking=none	seq5393	L27058	NA	chr5	+	123497144	123533832_x000D_
CUST_9487_PI428311958	7.80393	P	9.89592	P	0.234557	4.26335	down	0	CUST_9487_PI428311958	0	lncRNA	NA	"gi|293360047|ref|XR_086285.1| PREDICTED: Rattus norvegicus similar to mKIAA0998 protein (RGD1563583), miscRNA"	seq9588	XR_086285.1	NA	NA	NA	NA	NA_x000D_
CUST_7516_PI428311958	3.47816	A	5.56236	P	0.235826	4.24041	down	0	CUST_7516_PI428311958	0	lncRNA	NA	rn4_all_mrna_BC166764 range=chr12:43747236-43814910 5'pad=0 3'pad=0 strand=+ repeatMasking=none	seq7592	BC166764	NA	chr12	+	43747236	43814910_x000D_
CUST_9649_PI428311958	8.10138	P	10.1848	P	0.235958	4.23805	down	0	CUST_9649_PI428311958	0	lncRNA	NA	"gi|295851920|ref|XR_007629.3| PREDICTED: Rattus norvegicus similar to mKIAA0998 protein (RGD1563583), miscRNA"	seq9750	XR_007629.3	NA	NA	NA	NA	NA_x000D_
CUST_5349_PI428311958	6.63063	P	8.68292	P	0.241101	4.14763	down	0	CUST_5349_PI428311958	0	lncRNA	NA	rn4_all_mrna_FQ218418 range=chr5:123501874-123502987 5'pad=0 3'pad=0 strand=+ repeatMasking=none	seq5394	FQ218418	NA	chr5	+	123501874	123502987_x000D_
CUST_3333_PI428311958	6.83669	P	8.8861	P	0.241582	4.13938	down	0	CUST_3333_PI428311958	0	lncRNA	NA	rn4_all_mrna_FQ231558 range=chr1:42270877-42271761 5'pad=0 3'pad=0 strand=- repeatMasking=none	seq3345	FQ231558	NA	chr1	-	42270877	42271761_x000D_
CUST_8376_PI428311958	7.37264	P	9.41522	P	0.242729	4.11982	down	0	CUST_8376_PI428311958	0	lncRNA	NA	rn4_all_mrna_FQ215493 range=chr16:59355838-59356894 5'pad=0 3'pad=0 strand=+ repeatMasking=none	seq8467	FQ215493	NA	chr16	+	59355838	59356894_x000D_
CUST_3859_PI428311958	5.97822	P	8.01554	P	0.243616	4.10482	down	0	CUST_3859_PI428311958	0	lncRNA	NA	rn4_all_mrna_FQ217306 range=chr2:192533769-192557431 5'pad=0 3'pad=0 strand=- repeatMasking=none	seq3879	FQ217306	NA	chr2	-	192533769	192557431_x000D_
CUST_1940_PI428311958	6.39002	P	8.41962	P	0.244923	4.08292	down	0	CUST_1940_PI428311958	0	lncRNA	NA	"chr5|mm9_knownGene_uc008twn.1| strand:+ 123707452-123707490,123707494-123707609,123707617-123707661,123707665-123707671,123707674-123707695,123707710-123707779,123708658-123708780,123797273-123797336,123805066-123805090,123807902-123807973,123811638-123811694,123813687-123813741,"	seq1946	uc008twn.1	NA	chr5	+	123707456	123813744_x000D_
CUST_1980_PI428311958	3.64735	A	5.67449	P	0.245341	4.07596	down	0	CUST_1980_PI428311958	0	lncRNA	NA	"chr1|mm9_knownGene_uc009jgk.1| strand:- 169958282-169958419,169930126-169930218,"	seq1986	uc009jgk.1	NA	chr1	-	169930128	169958416_x000D_
CUST_881_PI428311958	8.96072	P	10.9464	P	0.252499	3.96041	down	0	CUST_881_PI428311958	0	lncRNA	NA	"chr17|mm9_knownGene_uc011zaf.1| strand:- 13934951-13935128,13930465-13930563,13919490-13919602,13919437-13919487,13918846-13919006,13917511-13917514,13917327-13917473,13915451-13915592,13913806-13914018,13912940-13913077,13912241-13912386,13911477-13911613,13910677-13910807,13908387-13908511,13907476-13907579,13906956-13907047,13905510-13905538,13905476-13905495,13905455-13905468,13905329-139054…	seq884	uc011zaf.1	NA	chr17	-	13904900	13935128_x000D_
CUST_7372_PI428311958	3.57027	A	5.54755	P	0.253969	3.9375	down	0	CUST_7372_PI428311958	0	lncRNA	NA	rn4_all_mrna_AF452727 range=chr11:12504519-12504843 5'pad=0 3'pad=0 strand=+ repeatMasking=none	seq7448	AF452727	NA	chr11	+	12504519	12504843_x000D_
CUST_5845_PI428311958	3.66281	A	5.63262	P	0.255287	3.91715	down	0	CUST_5845_PI428311958	0	lncRNA	NA	rn4_all_mrna_BC091257 range=chr6:142977904-142978347 5'pad=0 3'pad=0 strand=- repeatMasking=none	seq5895	BC091257	NA	chr6	-	142977904	142978347_x000D_
CUST_1421_PI428311958	3.96972	A	5.92648	P	0.257605	3.88191	down	0	CUST_1421_PI428311958	0	lncRNA	NA	"chr8|ri|A230063G15|PX00742P05|1095| strand:+ 127177495-127177768,127177824-127177845,127177848-127177912,127177913-127178004,127178005-127178216,127178224-127178322,127178330-127178339,127178340-127178361,127178374-127178383,127178398-127178401,127178403-127178408,127178411-127178445,127178451-127178468,127178469-127178508,127178558-127178597,127178598-127178607,127178610-127178616,"	seq1426	PX00742P05	NA	chr8	+	127177496	127178616_x000D_
CUST_1348_PI428311958	4.67787	A	6.63306	P	0.257887	3.87766	down	0	CUST_1348_PI428311958	0	lncRNA	NA	"chr6|mm9_knownGene_uc008wyx.1| strand:- 24791866-24791893,24787984-24788135,24759891-24759905,24759863-24759890,24759836-24759862,24759348-24759424,"	seq1352	uc008wyx.1	NA	chr6	-	24759348	24791892_x000D_
CUST_9014_PI428311958	7.85535	P	9.80781	P	0.258374	3.87035	down	0	CUST_9014_PI428311958	0	lncRNA	NA	rn4_all_mrna_FQ222421 range=chr20:12322492-12324787 5'pad=0 3'pad=0 strand=+ repeatMasking=none	seq9113	FQ222421	NA	chr20	+	12322492	12324787_x000D_
CUST_3215_PI428311958	8.29905	P	10.2484	P	0.25894	3.8619	down	0	CUST_3215_PI428311958	0	lncRNA	NA	rn4_all_mrna_L14933 range=chr1:221119935-221405914 5'pad=0 3'pad=0 strand=- repeatMasking=none	seq3227	L14933	NA	chr1	-	221119935	221405914_x000D_
CUST_6947_PI428311958	5.26849	P	7.21588	P	0.259286	3.85675	down	0	CUST_6947_PI428311958	0	lncRNA	NA	rn4_all_mrna_FQ232792 range=chr10:11028502-11029817 5'pad=0 3'pad=0 strand=+ repeatMasking=none	seq7019	FQ232792	NA	chr10	+	11028502	11029817_x000D_
CUST_1322_PI428311958	7.19415	P	9.13856	P	0.259821	3.8488	down	0	CUST_1322_PI428311958	0	lncRNA	NA	"chr6|mm9_knownGene_uc007oif.1| strand:+ 111154806-111154853,111154873-111154895,111154897-111154946,111182495-111182498,111182499-111182557,111186008-111186219,111186727-111186804,111187222-111187263,111191150-111191188,111198624-111198757,111200057-111200110,111202125-111202227,111204181-111204260,111204866-111204947,111205059-111205181,111205830-111205959,111208128-111208242,111208644-11120879…	seq1326	uc007oif.1	NA	chr6	+	111154808	111223800_x000D_
CUST_2761_PI428311958	5.67618	P	7.61443	P	0.260934	3.83238	down	0	CUST_2761_PI428311958	0	lncRNA	NA	uc.16+	seq2770	uc.16+	NA	chr5	-	143875328	143875536_x000D_
CUST_1948_PI428311958	8.63849	P	10.5527	P	0.265317	3.76908	down	0	CUST_1948_PI428311958	0	lncRNA	NA	"chr5|mm9_knownGene_uc008wfa.2| strand:+ 172700982-172701226,172701307-172701346,172701418-172701494,172701567-172701647,172701809-172701943,172701955-172702000,172702001-172702064,172702069-172702097,172702098-172702114,172702117-172702207,172702208-172702242,172702277-172702284,172702290-172702299,172702300-172702422,172702438-172702497,172702527-172702607,"	seq1954	uc008wfa.2	NA	chr5	+	172700976	172702608_x000D_
CUST_6426_PI428311958	3.60344	A	5.51622	P	0.265581	3.76532	down	0	CUST_6426_PI428311958	0	lncRNA	NA	rn4_all_mrna_U31866 range=chr8:108228262-108228844 5'pad=0 3'pad=0 strand=- repeatMasking=none	seq6489	U31866	NA	chr8	-	108228262	108228844_x000D_
CUST_7378_PI428311958	9.6076	P	11.5125	P	0.26703	3.7449	down	0	CUST_7378_PI428311958	0	lncRNA	NA	rn4_all_mrna_FQ214246 range=chr11:24457163-24472979 5'pad=0 3'pad=0 strand=- repeatMasking=none	seq7454	FQ214246	NA	chr11	-	24457163	24472979_x000D_
CUST_1689_PI428311958	8.70648	P	10.607	P	0.267854	3.73338	down	0	CUST_1689_PI428311958	0	lncRNA	NA	"chr3|mm9_knownGene_uc012btm.1| strand:+ 9310187-9310194,9310198-9310257,9310505-9310586,9314021-9314175,9323436-9323562,9323663-9323779,9324526-9324649,9325220-9325286,9325294-9325300,9325322-9325346,9325347-9325350,9325368-9325432,9325435-9325447,9325467-9325471,9325475-9325524,9325555-9325611,"	seq1695	uc012btm.1	NA	chr3	+	9310187	9325611_x000D_
CUST_8959_PI428311958	4.94733	A	6.83929	P	0.269441	3.71139	down	0	CUST_8959_PI428311958	0	lncRNA	NA	rn4_all_mrna_D26499 range=chr20:9039999-9044251 5'pad=0 3'pad=0 strand=+ repeatMasking=none	seq9058	D26499	NA	chr20	+	9039999	9044251_x000D_
CUST_9303_PI428311958	7.18764	P	9.07705	P	0.269918	3.70483	down	0	CUST_9303_PI428311958	0	lncRNA	NA	"gi|293345464|ref|XR_085761.1| PREDICTED: Rattus norvegicus similar to Thrombospondin-3 precursor (LOC681309), miscRNA"	seq9404	XR_085761.1	NA	NA	NA	NA	NA_x000D_
CUST_5812_PI428311958	5.40556	P	7.28753	P	0.271313	3.68578	down	0	CUST_5812_PI428311958	0	lncRNA	NA	rn4_all_mrna_BC088245 range=chr6:137441261-137444392 5'pad=0 3'pad=0 strand=+ repeatMasking=none	seq5862	BC088245	NA	chr6	+	137441261	137444392_x000D_
CUST_8622_PI428311958	4.49349	A	6.36833	P	0.272658	3.6676	down	0	CUST_8622_PI428311958	0	lncRNA	NA	rn4_all_mrna_FQ233542 range=chr17:82891803-82892925 5'pad=0 3'pad=0 strand=+ repeatMasking=none	seq8714	FQ233542	NA	chr17	+	82891803	82892925_x000D_
CUST_8964_PI428311958	8.56336	P	10.4311	P	0.273994	3.64972	down	0	CUST_8964_PI428311958	0	lncRNA	NA	rn4_all_mrna_FQ221747 range=chr20:43077832-43260730 5'pad=0 3'pad=0 strand=+ repeatMasking=none	seq9063	FQ221747	NA	chr20	+	43077832	43260730_x000D_
CUST_613_PI428311958	6.90948	P	8.77196	P	0.275003	3.63633	down	0	CUST_613_PI428311958	0	lncRNA	NA	"chr6|mm9_knownGene_uc008dnq.1| strand:+ 21417707-21417715,21417720-21417752,21424868-21424925,21427441-21427534,21427608-21427610,21428696-21428801,21543333-21543459,21544497-21544558,21552157-21552205,21552206-21552214,21552540-21552618,21553750-21553891,21555138-21555230,21555699-21555850,21556761-21556831,21558228-21558334,21560321-21560502,21562381-21562558,21563292-21563375,21564863-2156503…	seq615	uc008dnq.1	NA	chr6	+	21417707	21587506_x000D_
CUST_6464_PI428311958	9.1054	P	10.9672	P	0.275137	3.63456	down	0	CUST_6464_PI428311958	0	lncRNA	NA	rn4_all_mrna_FQ222381 range=chr8:120591054-120591456 5'pad=0 3'pad=0 strand=- repeatMasking=none	seq6527	FQ222381	NA	chr8	-	120591054	120591456_x000D_
CUST_7379_PI428311958	6.91225	P	8.77177	P	0.275566	3.62889	down	0	CUST_7379_PI428311958	0	lncRNA	NA	rn4_all_mrna_FQ226693 range=chr11:24539526-24540553 5'pad=0 3'pad=0 strand=- repeatMasking=none	seq7455	FQ226693	NA	chr11	-	24539526	24540553_x000D_
CUST_3335_PI428311958	5.92794	P	7.7828	P	0.276459	3.61717	down	0	CUST_3335_PI428311958	0	lncRNA	NA	rn4_all_mrna_AY325159 range=chr1:42788646-42820847 5'pad=0 3'pad=0 strand=- repeatMasking=none	seq3347	AY325159	NA	chr1	-	42788646	42820847_x000D_
CUST_8337_PI428311958	7.63201	P	9.48113	P	0.277563	3.60279	down	0	CUST_8337_PI428311958	0	lncRNA	NA	rn4_all_mrna_FQ224500 range=chr16:22532517-22532916 5'pad=0 3'pad=0 strand=- repeatMasking=none	seq8427	FQ224500	NA	chr16	-	22532517	22532916_x000D_
CUST_6780_PI428311958	4.06432	A	5.91334	P	0.277582	3.60254	down	0	CUST_6780_PI428311958	0	lncRNA	NA	rn4_all_mrna_BC086373 range=chrX:27887062-27888840 5'pad=0 3'pad=0 strand=- repeatMasking=none	seq6848	BC086373	NA	chrX	-	27887062	27888840_x000D_
CUST_8981_PI428311958	10.3909	P	12.2394	P	0.27768	3.60127	down	0	CUST_8981_PI428311958	0	lncRNA	NA	rn4_all_mrna_BC168181 range=chr20:4128057-4146045 5'pad=0 3'pad=0 strand=- repeatMasking=none	seq9080	BC168181	NA	chr20	-	4128057	4146045_x000D_
CUST_5868_PI428311958	7.65888	P	9.50437	P	0.278259	3.59377	down	0	CUST_5868_PI428311958	0	lncRNA	NA	rn4_all_mrna_BC091425 range=chr7:104463962-104465297 5'pad=0 3'pad=0 strand=- repeatMasking=none	seq5922	BC091425	NA	chr7	-	104463962	104465297_x000D_
CUST_7451_PI428311958	5.52773	P	7.36842	P	0.279188	3.58181	down	0	CUST_7451_PI428311958	0	lncRNA	NA	rn4_all_mrna_FQ225761 range=chr11:68886852-68887343 5'pad=0 3'pad=0 strand=- repeatMasking=none	seq7527	FQ225761	NA	chr11	-	68886852	68887343_x000D_
CUST_8134_PI428311958	4.03652	A	5.87429	P	0.279754	3.57458	down	0	CUST_8134_PI428311958	0	lncRNA	NA	rn4_all_mrna_AF196205 range=chr15:31922519-31923250 5'pad=0 3'pad=0 strand=+ repeatMasking=none	seq8220	AF196205	NA	chr15	+	31922519	31923250_x000D_
CUST_769_PI428311958	8.71023	P	10.5442	P	0.280493	3.56515	down	0	CUST_769_PI428311958	0	lncRNA	NA	"chr3|gi|357588430|ref|NR_045543.1|| strand:+ 9310366-9310414,9310418-9310433,9310507-9310586,9314021-9314179,9317380-9317455,9317581-9317628,9319506-9319561,9319648-9319710,9320097-9320118,9323439-9323562,9323663-9323779,9324526-9324649,9325220-9325286,9325294-9325300,9325322-9325346,9325347-9325350,9325368-9325432,9325435-9325447,9325467-9325471,9325475-9325524,9325555-9325613,"	seq772	NR_045543.1	NA	chr3	+	9310366	9325613_x000D_
CUST_1024_PI428311958	7.32206	P	9.15572	P	0.280552	3.5644	down	0	CUST_1024_PI428311958	0	lncRNA	NA	"chr14|gi|160333460|ref|NR_003966.1|| strand:- 38461278-38461293,38461091-38461275,38461060-38461090,38433447-38433763,38431042-38431236,38425651-38425855,38423116-38423201,38419994-38420100,38419610-38419741,38418905-38419026,38418888-38418891,38418744-38418791,38418740-38418743,38418539-38418738,38410543-38410617,38410376-38410529,38405677-38405859,38403796-38403800,38402631-38402904,38402603-3…	seq1027	NR_003966.1	NA	chr14	-	38341864	38461292_x000D_
CUST_1440_PI428311958	6.25103	P	8.0836	P	0.280763	3.56172	down	0	CUST_1440_PI428311958	0	lncRNA	NA	"chr3|mm9_knownGene_uc012byv.1| strand:+ 74492677-74492729,74569895-74569898,74747316-74747539,74747565-74747567,74747784-74748062,"	seq1445	uc012byv.1	NA	chr3	+	74492680	74748064_x000D_
CUST_5404_PI428311958	5.09906	P	6.92959	P	0.281161	3.55668	down	0	CUST_5404_PI428311958	0	lncRNA	NA	rn4_all_mrna_AH005388 range=chr5:142603399-142605300 5'pad=0 3'pad=0 strand=+ repeatMasking=none	seq5449	AH005388	NA	chr5	+	142603399	142605300_x000D_
CUST_1422_PI428311958	5.03316	A	6.86065	P	0.281753	3.54921	down	0	CUST_1422_PI428311958	0	lncRNA	NA	"chr15|mm9_knownGene_uc007unn.1| strand:- 50602112-50602174,50600571-50600712,50598358-50598421,50594794-50594832,"	seq1427	uc007unn.1	NA	chr15	-	50594792	50602176_x000D_
CUST_220_PI428311958	3.6374	A	5.46155	P	0.282406	3.541	down	0	CUST_220_PI428311958	0	lncRNA	NA	"chr8|gi|377834505|ref|XR_108147.2|| strand:- 114133820-114133869,114133798-114133819,114133754-114133791,114133690-114133741,114133660-114133689,114133356-114133659,114133270-114133352,114133211-114133251,114133169-114133206,"	seq220	XR_108147.2	NA	chr8	-	114133168	114133872_x000D_
CUST_4446_PI428311958	4.5435	A	6.36314	P	0.283292	3.52993	down	0	CUST_4446_PI428311958	0	lncRNA	NA	rn4_all_mrna_FQ232420 range=chr3:34385521-34386487 5'pad=0 3'pad=0 strand=+ repeatMasking=none	seq4473	FQ232420	NA	chr3	+	34385521	34386487_x000D_
CUST_7351_PI428311958	8.94844	P	10.7619	P	0.284504	3.51489	down	0	CUST_7351_PI428311958	0	lncRNA	NA	rn4_all_mrna_BC168188 range=chr11:57668361-57743724 5'pad=0 3'pad=0 strand=+ repeatMasking=none	seq7427	BC168188	NA	chr11	+	57668361	57743724_x000D_
CUST_9015_PI428311958	10.6031	P	12.4142	P	0.284984	3.50897	down	0	CUST_9015_PI428311958	0	lncRNA	NA	rn4_all_mrna_FQ224671 range=chr20:12336880-12338498 5'pad=0 3'pad=0 strand=+ repeatMasking=none	seq9114	FQ224671	NA	chr20	+	12336880	12338498_x000D_
CUST_8632_PI428311958	9.47938	P	11.2809	P	0.286868	3.48592	down	0	CUST_8632_PI428311958	0	lncRNA	NA	rn4_all_mrna_FQ230320 range=chr17:83027522-83028573 5'pad=0 3'pad=0 strand=+ repeatMasking=none	seq8724	FQ230320	NA	chr17	+	83027522	83028573_x000D_
CUST_146_PI428311958	4.47295	A	6.26109	P	0.289546	3.45369	down	0	CUST_146_PI428311958	0	lncRNA	NA	"chr6|mm9_knownGene_uc008drt.1| strand:- 4476971-4477074,4473884-4473901,4469796-4469855,4467083-4467088,4464990-4465123,"	seq146	uc008drt.1	NA	chr6	-	4464990	4477074_x000D_
CUST_9596_PI428311958	4.72863	A	6.51401	P	0.290099	3.4471	down	0	CUST_9596_PI428311958	0	lncRNA	NA	"gi|295851768|ref|XR_085728.2| PREDICTED: Rattus norvegicus similar to deleted in malignant brain tumors 1 isoform b precursor (LOC678762), miscRNA"	seq9697	XR_085728.2	NA	NA	NA	NA	NA_x000D_
CUST_2647_PI428311958	7.08632	P	8.87117	P	0.290206	3.44583	down	0	CUST_2647_PI428311958	0	lncRNA	NA	"chr1|gi|309271922|ref|XR_106194.1|| strand:- 209316714-209316877,209315775-209316065,209315695-209315774,209315658-209315693,209315653-209315656,209315527-209315652,209315506-209315526,"	seq2656	XR_106194.1	NA	chr1	-	209315504	209316880_x000D_
CUST_1799_PI428311958	4.48066	A	6.26245	P	0.290822	3.43853	down	0	CUST_1799_PI428311958	0	lncRNA	NA	"chr10|mm9_knownGene_uc007ile.1| strand:+ 19671311-19671378,19671380-19671401,20217602-20217616,20217618-20217632,20217633-20217659,20217665-20217755,20217760-20217779,20217784-20217788,20217792-20217797,20217799-20217917,"	seq1805	uc007ile.1	NA	chr10	+	19671312	20217916_x000D_
CUST_6691_PI428311958	7.647	P	9.42705	P	0.291172	3.4344	down	0	CUST_6691_PI428311958	0	lncRNA	NA	rn4_all_mrna_AF439716 range=chr9:92555918-92570670 5'pad=0 3'pad=0 strand=+ repeatMasking=none	seq6757	AF439716	NA	chr9	+	92555918	92570670_x000D_
CUST_7902_PI428311958	6.86709	P	8.64415	P	0.291777	3.42728	down	0	CUST_7902_PI428311958	0	lncRNA	NA	rn4_all_mrna_FQ212857 range=chr14:20377677-20378952 5'pad=0 3'pad=0 strand=- repeatMasking=none	seq7984	FQ212857	NA	chr14	-	20377677	20378952_x000D_
CUST_5350_PI428311958	7.02526	P	8.79587	P	0.293086	3.41197	down	0	CUST_5350_PI428311958	0	lncRNA	NA	rn4_all_mrna_FQ232891 range=chr5:123534196-123535332 5'pad=0 3'pad=0 strand=+ repeatMasking=none	seq5395	FQ232891	NA	chr5	+	123534196	123535332_x000D_
CUST_6669_PI428311958	8.49615	P	10.2649	P	0.293471	3.4075	down	0	CUST_6669_PI428311958	0	lncRNA	NA	rn4_all_mrna_BC160866 range=chr9:84795795-84797654 5'pad=0 3'pad=0 strand=+ repeatMasking=none	seq6735	BC160866	NA	chr9	+	84795795	84797654_x000D_
CUST_7745_PI428311958	5.68488	P	7.45298	P	0.293595	3.40605	down	0	CUST_7745_PI428311958	0	lncRNA	NA	rn4_all_mrna_FQ210292 range=chr13:76553856-76554447 5'pad=0 3'pad=0 strand=+ repeatMasking=none	seq7823	FQ210292	NA	chr13	+	76553856	76554447_x000D_
CUST_3792_PI428311958	3.76054	A	5.52732	P	0.293864	3.40293	down	0	CUST_3792_PI428311958	0	lncRNA	NA	rn4_all_mrna_FQ231062 range=chr1:251994345-251995630 5'pad=0 3'pad=0 strand=+ repeatMasking=none	seq3809	FQ231062	NA	chr1	+	251994345	251995630_x000D_
CUST_9051_PI428311958	4.39171	A	6.1568	P	0.294209	3.39895	down	0	CUST_9051_PI428311958	0	lncRNA	NA	rn4_all_mrna_FQ225354 range=chr20:32652247-32653317 5'pad=0 3'pad=0 strand=- repeatMasking=none	seq9150	FQ225354	NA	chr20	-	32652247	32653317_x000D_
CUST_2889_PI428311958	3.82423	A	5.58308	P	0.295483	3.38429	down	0	CUST_2889_PI428311958	0	lncRNA	NA	uc.150+	seq2898	uc.150+	NA	chr19	+	16340811	16340993_x000D_
CUST_4367_PI428311958	3.87991	A	5.63409	P	0.296442	3.37334	down	0	CUST_4367_PI428311958	0	lncRNA	NA	rn4_all_mrna_FQ211897 range=chr3:3746963-3753353 5'pad=0 3'pad=0 strand=- repeatMasking=none	seq4392	FQ211897	NA	chr3	-	3746963	3753353_x000D_
CUST_6613_PI428311958	6.76337	P	8.51539	P	0.296885	3.3683	down	0	CUST_6613_PI428311958	0	lncRNA	NA	rn4_all_mrna_FQ211370 range=chr9:61441975-61442386 5'pad=0 3'pad=0 strand=+ repeatMasking=none	seq6679	FQ211370	NA	chr9	+	61441975	61442386_x000D_
CUST_6121_PI428311958	4.15241	A	5.90184	P	0.297419	3.36226	down	0	CUST_6121_PI428311958	0	lncRNA	NA	rn4_all_mrna_AJ877234 range=chr7:130658419-130658894 5'pad=0 3'pad=0 strand=+ repeatMasking=none	seq6178	AJ877234	NA	chr7	+	130658419	130658894_x000D_
CUST_6914_PI428311958	10.0527	P	11.7948	P	0.298921	3.34536	down	0	CUST_6914_PI428311958	0	lncRNA	NA	rn4_all_mrna_M31461 range=chr10:72467812-72499906 5'pad=0 3'pad=0 strand=+ repeatMasking=none	seq6986	M31461	NA	chr10	+	72467812	72499906_x000D_
CUST_9553_PI428311958	5.73638	P	7.46572	P	0.301589	3.31577	down	0	CUST_9553_PI428311958	0	lncRNA	NA	"gi|295851666|ref|XR_085629.2| PREDICTED: Rattus norvegicus similar to UDP-glucose ceramide glucosyltransferase-like 2 (RGD1563520), miscRNA"	seq9654	XR_085629.2	NA	NA	NA	NA	NA_x000D_
CUST_2646_PI428311958	4.89984	A	6.62794	P	0.301848	3.31293	down	0	CUST_2646_PI428311958	0	lncRNA	NA	"chr9|ri|A230023E16|PX00127K09|3198| strand:- 62690125-62690143,62690079-62690124,62690065-62690073,62690023-62690064,62689684-62690006,62689458-62689672,62689322-62689454,62689275-62689308,62689171-62689274,62689154-62689168,62689122-62689152,62688963-62689117,62688849-62688962,62688837-62688848,62688831-62688836,62688776-62688828,62688627-62688775,62688573-62688622,62688527-62688572,62688464-62…	seq2655	PX00127K09	NA	chr9	-	62686692	62690144_x000D_
CUST_8338_PI428311958	6.77167	P	8.49837	P	0.302143	3.30969	down	0	CUST_8338_PI428311958	0	lncRNA	NA	rn4_all_mrna_FQ223609 range=chr16:22532837-22533548 5'pad=0 3'pad=0 strand=- repeatMasking=none	seq8428	FQ223609	NA	chr16	-	22532837	22533548_x000D_
CUST_9506_PI428311958	7.33584	P	9.05828	P	0.303036	3.29994	down	0	CUST_9506_PI428311958	0	lncRNA	NA	"gi|293361915|ref|XR_005447.2| PREDICTED: Rattus norvegicus similar to RIKEN cDNA 2610042L04 (LOC501224), miscRNA"	seq9607	XR_005447.2	NA	NA	NA	NA	NA_x000D_
CUST_1500_PI428311958	9.64962	P	11.3684	P	0.303816	3.29147	down	0	CUST_1500_PI428311958	0	lncRNA	NA	"chr9|ri|1700020N18|ZX00050P21|550| strand:- 90634205-90634277,90634198-90634202,90634178-90634197,90634145-90634168,90633743-90633856,90633708-90633710,90633421-90633462,90633214-90633416,90633152-90633213,"	seq1505	ZX00050P21	NA	chr9	-	90633152	90634280_x000D_
CUST_108_PI428311958	4.30533	A	6.01867	P	0.304953	3.2792	down	0	CUST_108_PI428311958	0	lncRNA	NA	"chr20|gi|358001061|ref|NR_045556.1|| strand:- 28015950-28016015,28015945-28015949,28015804-28015941,27980152-27980162,27980143-27980146,27980091-27980142,27973592-27973661,27965792-27965799,27919888-27920030,27919251-27919298,27919028-27919119,27864697-27864892,27861087-27861211,27859859-27859862,27853712-27853790,27803951-27804063,27802464-27802652,27781825-27781974,27781268-27781426,27755241-2…	seq108	NR_045556.1	NA	chr20	-	27622052	28016016_x000D_
CUST_1109_PI428311958	7.54581	P	9.25772	P	0.305256	3.27594	down	0	CUST_1109_PI428311958	0	lncRNA	NA	"chr6|mm9_knownGene_uc007nvi.1| strand:- 94412086-94412295,94407609-94407747,94405245-94405314,94404736-94404782,94404592-94404650,94397650-94397863,94397572-94397641,94397521-94397571,94397366-94397520,94397348-94397360,94397262-94397347,94397195-94397260,94397064-94397194,"	seq1112	uc007nvi.1	NA	chr6	-	94397064	94412296_x000D_
CUST_2015_PI428311958	9.00624	P	10.7176	P	0.305367	3.27475	down	0	CUST_2015_PI428311958	0	lncRNA	NA	"chr5|mm9_knownGene_uc008vjw.1| strand:+ 156755845-156756002,156756344-156756400,156756410-156756445,156756458-156756477,156756481-156756550,156809624-156809698,156829077-156829205,"	seq2021	uc008vjw.1	NA	chr5	+	156755840	156829200_x000D_
CUST_1115_PI428311958	5.85645	P	7.56393	P	0.306193	3.26592	down	0	CUST_1115_PI428311958	0	lncRNA	NA	"chr20|mm9_knownGene_uc007fbt.1| strand:- 32327187-32327400,32324928-32325078,32322298-32322417,32320429-32320613,32319847-32319993,32310014-32310131,32307275-32307379,32304155-32304359,32303215-32303271,32302579-32302659,32302546-32302571,32302463-32302540,32302230-32302456,32302225-32302228,32302139-32302222,32302096-32302138,"	seq1118	uc007fbt.1	NA	chr20	-	32302096	32327400_x000D_
CUST_9825_PI428311958	5.33277	P	7.03705	P	0.306874	3.25866	down	0	CUST_9825_PI428311958	0	lncRNA	NA	"gi|315583343|ref|NR_037674.1| Rattus norvegicus cytochrome c oxidase subunit VIa polypeptide 2 (Cox6a2), transcript variant 2, non-coding RNA"	seq9926	NR_037674.1	NA	chr1	-	187464578	187465325_x000D_
CUST_1974_PI428311958	8.49518	P	10.1941	P	0.308013	3.24661	down	0	CUST_1974_PI428311958	0	lncRNA	NA	"chr2|gi|354459385|ref|NR_045392.1|| strand:- 127830336-127830358,127830269-127830334,127829757-127830262,127829611-127829755,127829515-127829602,127829400-127829513,127829292-127829389,127829173-127829262,127829038-127829170,127828939-127829036,127828766-127828933,127828635-127828758,127828624-127828632,"	seq1980	NR_045392.1	NA	chr2	-	127828624	127830360_x000D_
CUST_1503_PI428311958	5.91975	P	7.61847	P	0.308059	3.24613	down	0	CUST_1503_PI428311958	0	lncRNA	NA	"chr4|mm9_knownGene_uc009byk.1| strand:- 80518002-80518087,80517951-80518001,80517046-80517316,80515794-80516055,80515784-80515793,80515649-80515780,"	seq1508	uc009byk.1	NA	chr4	-	80515648	80518088_x000D_
CUST_3058_PI428311958	4.35511	A	6.05155	P	0.308545	3.24102	down	0	CUST_3058_PI428311958	0	lncRNA	NA	uc.325+	seq3067	uc.325+	NA	chr3	-	91248496	91248736_x000D_
CUST_1860_PI428311958	7.7142	P	9.40736	P	0.309249	3.23364	down	0	CUST_1860_PI428311958	0	lncRNA	NA	"chr10|mm9_knownGene_uc007ikj.2| strand:- 18413173-18413204,18413060-18413168,18404437-18404583,18399992-18400082,18393895-18394061,18393881-18393887,18386682-18386686,18384968-18385021,18379616-18379720,18377775-18377940,18375231-18375305,18372385-18372495,18370405-18370551,18369450-18369619,18366428-18366589,18341420-18341528,18329743-18329878,18296933-18297087,18225896-18225901,18221558-182216…	seq1866	uc007ikj.2	NA	chr10	-	18220518	18413204_x000D_
CUST_8699_PI428311958	10.3161	P	12.0022	P	0.310768	3.21783	down	0	CUST_8699_PI428311958	0	lncRNA	NA	rn4_all_mrna_FQ213250 range=chr18:25840621-25841592 5'pad=0 3'pad=0 strand=- repeatMasking=none	seq8794	FQ213250	NA	chr18	-	25840621	25841592_x000D_
CUST_8621_PI428311958	6.81944	P	8.50013	P	0.311932	3.20583	down	0	CUST_8621_PI428311958	0	lncRNA	NA	rn4_all_mrna_FQ232731 range=chr17:82871790-82873174 5'pad=0 3'pad=0 strand=+ repeatMasking=none	seq8713	FQ232731	NA	chr17	+	82871790	82873174_x000D_
CUST_9457_PI428311958	4.90751	A	6.58559	P	0.312498	3.20002	down	0	CUST_9457_PI428311958	0	lncRNA	NA	"gi|293356826|ref|XR_086152.1| PREDICTED: Rattus norvegicus family with sequence similarity 184, member A (Fam184a), miscRNA"	seq9558	XR_086152.1	NA	NA	NA	NA	NA_x000D_
CUST_1998_PI428311958	4.71221	A	6.38764	P	0.313073	3.19414	down	0	CUST_1998_PI428311958	0	lncRNA	NA	"chr4|mm9_knownGene_uc012evv.1| strand:- 186048854-186049033,186039503-186039573,186035335-186035513,186033772-186033977,185963167-185963270,185951381-185951570,185932011-185932132,185920119-185920285,185910447-185910560,185899172-185899316,185877380-185877488,185864472-185864569,185862583-185862718,185861915-185862059,185860883-185861020,"	seq2004	uc012evv.1	NA	chr4	-	185860880	186049040_x000D_
CUST_1547_PI428311958	5.28435	P	6.95947	P	0.31314	3.19346	down	0	CUST_1547_PI428311958	0	lncRNA	NA	"chr4|mm9_knownGene_uc012evh.1| strand:+ 178959884-178960007,178960009-178960142,178960144-178960190,178960200-178960212,178960213-178960242,178966757-178966909,178967990-178968129,178974565-178974698,178975810-178975937,178977814-178977950,178980151-178980249,178981813-178981990,178981994-178982056,178982143-178982145,178982907-178983074,178989480-178989673,178993807-178993931,178998297-17899848…	seq1553	uc012evh.1	NA	chr4	+	178959888	179007120_x000D_
CUST_6591_PI428311958	7.77585	P	9.44765	P	0.31386	3.18613	down	0	CUST_6591_PI428311958	0	lncRNA	NA	rn4_all_mrna_AF020778 range=chr9:44929413-44929651 5'pad=0 3'pad=0 strand=+ repeatMasking=none	seq6656	AF020778	NA	chr9	+	44929413	44929651_x000D_
CUST_772_PI428311958	9.81373	P	11.4832	P	0.314362	3.18104	down	0	CUST_772_PI428311958	0	lncRNA	NA	"chr9|ri|C730047K05|PX00087P22|527| strand:- 36375434-36375467,36375328-36375433,36373687-36373770,36365363-36365406,36365306-36365348,36365254-36365293,36365149-36365253,"	seq775	PX00087P22	NA	chr9	-	36365149	36375467_x000D_
CUST_6058_PI428311958	5.12995	A	6.79945	P	0.314363	3.18104	down	0	CUST_6058_PI428311958	0	lncRNA	NA	rn4_all_mrna_FQ231974 range=chr7:113151937-113152802 5'pad=0 3'pad=0 strand=+ repeatMasking=none	seq6114	FQ231974	NA	chr7	+	113151937	113152802_x000D_
CUST_1168_PI428311958	7.29312	P	8.96038	P	0.314852	3.1761	down	0	CUST_1168_PI428311958	0	lncRNA	NA	"chr5|mm9_knownGene_uc008sjz.1| strand:- 59223652-59223663,59223634-59223651,59223599-59223606,59223444-59223597,59222379-59222514,59222076-59222162,59221881-59221980,59221832-59221858,59221749-59221825,59221739-59221748,"	seq1171	uc008sjz.1	NA	chr5	-	59221740	59223664_x000D_
CUST_7673_PI428311958	3.9773	A	5.6433	P	0.315125	3.17335	down	0	CUST_7673_PI428311958	0	lncRNA	NA	rn4_all_mrna_U02506 range=chr13:43804908-43805290 5'pad=0 3'pad=0 strand=+ repeatMasking=none	seq7751	U02506	NA	chr13	+	43804908	43805290_x000D_
CUST_2979_PI428311958	4.34913	A	6.01267	P	0.315664	3.16792	down	0	CUST_2979_PI428311958	0	lncRNA	NA	uc.245+	seq2988	uc.245+	NA	chr7	+	76213632	76213976_x000D_
CUST_1518_PI428311958	6.95176	P	8.61285	P	0.316199	3.16256	down	0	CUST_1518_PI428311958	0	lncRNA	NA	"chr4|ri|2500001D08|ZX00052L09|837| strand:+ 42988229-42988272,42988341-42988420,42988424-42988526,42988527-42988568,42988569-42988573,42988577-42988769,42988771-42988889,42988890-42988987,42988988-42989044,"	seq1523	ZX00052L09	NA	chr4	+	42988228	42989044_x000D_
CUST_8623_PI428311958	5.18229	P	6.82667	P	0.319885	3.12612	down	0	CUST_8623_PI428311958	0	lncRNA	NA	rn4_all_mrna_FQ227269 range=chr17:82892038-82893169 5'pad=0 3'pad=0 strand=+ repeatMasking=none	seq8715	FQ227269	NA	chr17	+	82892038	82893169_x000D_
CUST_4847_PI428311958	10.4458	P	12.0882	P	0.320335	3.12173	down	0	CUST_4847_PI428311958	0	lncRNA	NA	rn4_all_mrna_FQ228611 range=chr4:56283904-56307122 5'pad=0 3'pad=0 strand=+ repeatMasking=none	seq4879	FQ228611	NA	chr4	+	56283904	56307122_x000D_
CUST_652_PI428311958	6.71913	P	8.3543	P	0.321932	3.10624	down	0	CUST_652_PI428311958	0	lncRNA	NA	"chr1|mm9_knownGene_uc009hnn.1| strand:+ 126242475-126242526,126242527-126242650,126242652-126242825,126248854-126249140,"	seq655	uc009hnn.1	NA	chr1	+	126242475	126249140_x000D_
CUST_7269_PI428311958	5.39462	P	7.02963	P	0.321968	3.1059	down	0	CUST_7269_PI428311958	0	lncRNA	NA	rn4_all_mrna_AF227190 range=chr10:90573045-90580745 5'pad=0 3'pad=0 strand=+ repeatMasking=none	seq7344	AF227190	NA	chr10	+	90573045	90580745_x000D_
CUST_3286_PI428311958	5.68891	P	7.32309	P	0.322155	3.1041	down	0	CUST_3286_PI428311958	0	lncRNA	NA	rn4_all_mrna_FQ225942 range=chr1:16004259-16005380 5'pad=0 3'pad=0 strand=- repeatMasking=none	seq3298	FQ225942	NA	chr1	-	16004259	16005380_x000D_
CUST_6562_PI428311958	4.90954	A	6.53855	P	0.323312	3.09299	down	0	CUST_6562_PI428311958	0	lncRNA	NA	rn4_all_mrna_FQ233891 range=chr9:32792426-32793405 5'pad=0 3'pad=0 strand=+ repeatMasking=none	seq6627	FQ233891	NA	chr9	+	32792426	32793405_x000D_
CUST_1718_PI428311958	8.95589	P	10.5808	P	0.32424	3.08414	down	0	CUST_1718_PI428311958	0	lncRNA	NA	"chr19|mm9_knownGene_uc009mlp.1| strand:+ 25826751-25826856,25826857-25826867,25826876-25827052,25827704-25827921,25827936-25827943,25827944-25827963,25827967-25827973,"	seq1724	uc009mlp.1	NA	chr19	+	25826752	25827972_x000D_
CUST_5426_PI428311958	4.40405	A	6.02737	P	0.324589	3.08082	down	0	CUST_5426_PI428311958	0	lncRNA	NA	rn4_all_mrna_FQ217051 range=chr5:148469056-148469297 5'pad=0 3'pad=0 strand=+ repeatMasking=none	seq5472	FQ217051	NA	chr5	+	148469056	148469297_x000D_
CUST_8624_PI428311958	6.06161	P	7.68226	P	0.325188	3.07514	down	0	CUST_8624_PI428311958	0	lncRNA	NA	rn4_all_mrna_FQ227161 range=chr17:82938272-82939222 5'pad=0 3'pad=0 strand=+ repeatMasking=none	seq8716	FQ227161	NA	chr17	+	82938272	82939222_x000D_
CUST_4825_PI428311958	5.45531	P	7.07391	P	0.325652	3.07076	down	0	CUST_4825_PI428311958	0	lncRNA	NA	rn4_all_mrna_FQ225614 range=chr4:27979795-27995899 5'pad=0 3'pad=0 strand=- repeatMasking=none	seq4857	FQ225614	NA	chr4	-	27979795	27995899_x000D_
CUST_2124_PI428311958	6.49975	P	8.11776	P	0.325786	3.0695	down	0	CUST_2124_PI428311958	0	lncRNA	NA	"chr14|ri|6330501O17|PX00717I13|1515| strand:- 20379065-20379139,20379041-20379061,20378963-20379039,20378912-20378958,20378536-20378897,20378475-20378530,20378407-20378474,20378360-20378400,20378332-20378352,20378323-20378331,20378287-20378301,20378239-20378252,20377907-20378237,20377845-20377905,20377681-20377842,"	seq2130	PX00717I13	NA	chr14	-	20377680	20379140_x000D_
CUST_4769_PI428311958	6.07124	P	7.68895	P	0.325853	3.06887	down	0	CUST_4769_PI428311958	0	lncRNA	NA	rn4_all_mrna_AB511909 range=chr4:62344188-62394263 5'pad=0 3'pad=0 strand=- repeatMasking=none	seq4800	AB511909	NA	chr4	-	62344188	62394263_x000D_
CUST_8630_PI428311958	7.45569	P	9.0726	P	0.326034	3.06716	down	0	CUST_8630_PI428311958	0	lncRNA	NA	rn4_all_mrna_FQ225689 range=chr17:83024868-83027448 5'pad=0 3'pad=0 strand=+ repeatMasking=none	seq8722	FQ225689	NA	chr17	+	83024868	83027448_x000D_
CUST_4862_PI428311958	8.44739	P	10.0632	P	0.326291	3.06474	down	0	CUST_4862_PI428311958	0	lncRNA	NA	rn4_all_mrna_DQ266361 range=chr4:61726887-61727127 5'pad=0 3'pad=0 strand=+ repeatMasking=none	seq4894	DQ266361	NA	chr4	+	61726887	61727127_x000D_
CUST_1877_PI428311958	7.27369	P	8.88705	P	0.326836	3.05964	down	0	CUST_1877_PI428311958	0	lncRNA	NA	"chr17|mm9_knownGene_uc012ayw.1| strand:+ 62799934-62799962,62800108-62800254,62815039-62815227,"	seq1883	uc012ayw.1	NA	chr17	+	62799936	62815228_x000D_
CUST_1604_PI428311958	5.73378	P	7.34587	P	0.327124	3.05695	down	0	CUST_1604_PI428311958	0	lncRNA	NA	"chr16|mm9_knownGene_uc012gdx.1| strand:- 40740158-40740166,40739798-40739843,40739718-40739794,40739459-40739716,40624653-40624781,40624566-40624651,40624502-40624565,40624436-40624487,40624315-40624426,40624276-40624314,"	seq1610	uc012gdx.1	NA	chr16	-	40624276	40740168_x000D_
CUST_6372_PI428311958	5.84461	P	7.45604	P	0.327275	3.05553	down	0	CUST_6372_PI428311958	0	lncRNA	NA	rn4_all_mrna_U57362 range=chr8:84641364-84658511 5'pad=0 3'pad=0 strand=- repeatMasking=none	seq6435	U57362	NA	chr8	-	84641364	84658511_x000D_
CUST_9212_PI428311958	6.24751	P	7.8565	P	0.32783	3.05037	down	0	CUST_9212_PI428311958	0	lncRNA	NA	"gi|293341151|ref|XR_085591.1| PREDICTED: Rattus norvegicus similar to G protein-coupled receptor 133 (LOC687426), miscRNA"	seq9313	XR_085591.1	NA	NA	NA	NA	NA_x000D_
CUST_6786_PI428311958	5.2941	A	6.90163	P	0.32816	3.04729	down	0	CUST_6786_PI428311958	0	lncRNA	NA	rn4_all_mrna_FQ215947 range=chrX:35233897-35234842 5'pad=0 3'pad=0 strand=+ repeatMasking=none	seq6854	FQ215947	NA	chrX	+	35233897	35234842_x000D_
CUST_6979_PI428311958	6.12325	P	7.72875	P	0.328621	3.04302	down	0	CUST_6979_PI428311958	0	lncRNA	NA	rn4_all_mrna_BC076383 range=chr10:15050382-15053046 5'pad=0 3'pad=0 strand=- repeatMasking=none	seq7052	BC076383	NA	chr10	-	15050382	15053046_x000D_
CUST_9499_PI428311958	5.60237	P	7.20062	P	0.330276	3.02777	down	0	CUST_9499_PI428311958	0	lncRNA	NA	"gi|293361434|ref|XR_086331.1| PREDICTED: Rattus norvegicus tetratricopeptide repeat domain 21A (ttc21a), miscRNA"	seq9600	XR_086331.1	NA	NA	NA	NA	NA_x000D_
CUST_8189_PI428311958	6.17823	P	7.77564	P	0.330471	3.02599	down	0	CUST_8189_PI428311958	0	lncRNA	NA	rn4_all_mrna_FQ234357 range=chr15:44393365-44394567 5'pad=0 3'pad=0 strand=- repeatMasking=none	seq8277	FQ234357	NA	chr15	-	44393365	44394567_x000D_
CUST_414_PI428311958	8.57359	P	10.171	P	0.330476	3.02594	down	0	CUST_414_PI428311958	0	lncRNA	NA	"chr19|gi|359385694|ref|NR_045594.1|| strand:- 35806912-35807100,35801967-35802062,35800561-35800692,35797990-35798136,35797836-35797890,35796104-35796234,35794066-35794298,35794061-35794065,35793701-35793915,35792987-35793149,35792817-35792907,35792473-35792530,35791964-35792002,35791951-35791958,35791828-35791950,35791341-35791459,35790072-35790170,35789702-35789804,35789257-35789361,35788873-3…	seq416	NR_045594.1	NA	chr19	-	35785169	35807100_x000D_
CUST_1933_PI428311958	8.77724	P	10.3715	P	0.331189	3.01942	down	0	CUST_1933_PI428311958	0	lncRNA	NA	"chr7|gi|319738627|ref|NR_037708.1|| strand:+ 16043113-16043175,16048424-16048610,16048790-16049136,16050238-16050394,16051707-16051924,16056183-16056271,16056375-16056520,16057020-16057063,16057195-16057300,16057391-16057537,16057679-16057820,16061941-16062048,16062347-16062492,16062586-16062649,16063643-16063745,16063989-16064122,16064205-16064328,16068029-16068109,16068203-16068366,16068457-16…	seq1939	NR_037708.1	NA	chr7	+	16043113	16072986_x000D_
CUST_125_PI428311958	7.02696	P	8.61844	P	0.331832	3.01358	down	0	CUST_125_PI428311958	0	lncRNA	NA	"chr11|mm9_knownGene_uc007zym.1| strand:+ 31832110-31832306,31832312-31832323,31834275-31834400,31835201-31835208,31841506-31841753,31843771-31843930,31845727-31845904,"	seq125	uc007zym.1	NA	chr11	+	31832110	31845904_x000D_
CUST_5442_PI428311958	9.39831	P	10.9883	P	0.332181	3.01041	down	0	CUST_5442_PI428311958	0	lncRNA	NA	rn4_all_mrna_FQ228695 range=chr5:154002128-154003627 5'pad=0 3'pad=0 strand=- repeatMasking=none	seq5488	FQ228695	NA	chr5	-	154002128	154003627_x000D_
CUST_9801_PI428311958	14.8728	P	16.461	P	0.332585	3.00675	down	0	CUST_9801_PI428311958	0	lncRNA	NA	"gi|295852575|ref|XR_086349.2| PREDICTED: Rattus norvegicus hypothetical LOC100361416 (LOC100361416), miscRNA"	seq9902	XR_086349.2	NA	NA	NA	NA	NA_x000D_
CUST_9510_PI428311958	6.95715	P	8.54273	P	0.333192	3.00127	down	0	CUST_9510_PI428311958	0	lncRNA	NA	"gi|293362530|ref|XR_086359.1| PREDICTED: Rattus norvegicus ras-related protein Rab-27B-like (LOC363410), miscRNA"	seq9611	XR_086359.1	NA	NA	NA	NA	NA_x000D_
CUST_4252_PI428311958	6.98287	P	8.56363	P	0.334305	2.99128	down	0	CUST_4252_PI428311958	0	lncRNA	NA	rn4_all_mrna_FQ234680 range=chr2:218660866-218661680 5'pad=0 3'pad=0 strand=+ repeatMasking=none	seq4277	FQ234680	NA	chr2	+	218660866	218661680_x000D_
CUST_4888_PI428311958	4.90537	A	6.48342	P	0.334935	2.98565	down	0	CUST_4888_PI428311958	0	lncRNA	NA	rn4_all_mrna_FQ211472 range=chr4:70522594-70570263 5'pad=0 3'pad=0 strand=- repeatMasking=none	seq4922	FQ211472	NA	chr4	-	70522594	70570263_x000D_
CUST_6289_PI428311958	5.89123	P	7.46809	P	0.335212	2.98319	down	0	CUST_6289_PI428311958	0	lncRNA	NA	rn4_all_mrna_BC086367 range=chr8:57751305-57764634 5'pad=0 3'pad=0 strand=+ repeatMasking=none	seq6352	BC086367	NA	chr8	+	57751305	57764634_x000D_
CUST_4376_PI428311958	8.55339	P	10.1239	P	0.336678	2.9702	down	0	CUST_4376_PI428311958	0	lncRNA	NA	rn4_all_mrna_FQ233333 range=chr3:6957540-6971451 5'pad=0 3'pad=0 strand=+ repeatMasking=none	seq4402	FQ233333	NA	chr3	+	6957540	6971451_x000D_
CUST_7839_PI428311958	6.26139	P	7.83152	P	0.336778	2.96932	down	0	CUST_7839_PI428311958	0	lncRNA	NA	rn4_all_mrna_FQ224412 range=chr14:47167104-47209967 5'pad=0 3'pad=0 strand=- repeatMasking=none	seq7920	FQ224412	NA	chr14	-	47167104	47209967_x000D_
CUST_1419_PI428311958	7.03353	P	8.60018	P	0.337591	2.96216	down	0	CUST_1419_PI428311958	0	lncRNA	NA	"chr10|mm9_knownGene_uc008avz.1| strand:- 13712855-13713031,13709188-13709339,13707249-13707360,13705043-13705236,13704835-13704955,13704528-13704680,13704264-13704430,13703936-13703939,13703830-13703925,13703721-13703829,13703223-13703325,13702892-13703089,13702522-13702720,13702301-13702443,13702168-13702230,13701668-13702092,13701635-13701660,13701615-13701622,13701604-13701609,13701599-137016…	seq1424	uc008avz.1	NA	chr10	-	13701560	13713031_x000D_
CUST_4953_PI428311958	4.45225	A	6.01587	P	0.338302	2.95594	down	0	CUST_4953_PI428311958	0	lncRNA	NA	rn4_all_mrna_AF217588 range=chr4:98877549-98877790 5'pad=0 3'pad=0 strand=- repeatMasking=none	seq4987	AF217588	NA	chr4	-	98877549	98877790_x000D_
CUST_8631_PI428311958	8.10757	P	9.67012	P	0.338553	2.95375	down	0	CUST_8631_PI428311958	0	lncRNA	NA	rn4_all_mrna_FQ226457 range=chr17:83026023-83027131 5'pad=0 3'pad=0 strand=+ repeatMasking=none	seq8723	FQ226457	NA	chr17	+	83026023	83027131_x000D_
CUST_8971_PI428311958	9.68426	P	11.2415	P	0.339811	2.94281	down	0	CUST_8971_PI428311958	0	lncRNA	NA	rn4_all_mrna_FQ226239 range=chr20:2907178-2913296 5'pad=0 3'pad=0 strand=+ repeatMasking=none	seq9070	FQ226239	NA	chr20	+	2907178	2913296_x000D_
CUST_6661_PI428311958	4.68689	A	6.23733	P	0.341405	2.92907	down	0	CUST_6661_PI428311958	0	lncRNA	NA	rn4_all_mrna_FQ215929 range=chr9:81581794-81582027 5'pad=0 3'pad=0 strand=- repeatMasking=none	seq6727	FQ215929	NA	chr9	-	81581794	81582027_x000D_
CUST_6692_PI428311958	9.18708	P	10.736	P	0.34176	2.92603	down	0	CUST_6692_PI428311958	0	lncRNA	NA	rn4_all_mrna_FQ212488 range=chr9:92570670-92571905 5'pad=0 3'pad=0 strand=+ repeatMasking=none	seq6758	FQ212488	NA	chr9	+	92570670	92571905_x000D_
CUST_9197_PI428311958	6.23141	P	7.77709	P	0.342533	2.91942	down	0	CUST_9197_PI428311958	0	lncRNA	NA	"gi|293339954|ref|XR_085575.1| PREDICTED: Rattus norvegicus hydroxyacylglutathione hydrolase-like (LOC100365011), miscRNA"	seq9298	XR_085575.1	NA	NA	NA	NA	NA_x000D_
CUST_3679_PI428311958	8.67702	P	10.2152	P	0.34431	2.90436	down	0	CUST_3679_PI428311958	0	lncRNA	NA	rn4_all_mrna_FQ221838 range=chr1:208475347-208479840 5'pad=0 3'pad=0 strand=- repeatMasking=none	seq3696	FQ221838	NA	chr1	-	208475347	208479840_x000D_
CUST_7381_PI428311958	4.47892	A	6.01676	P	0.344401	2.90359	down	0	CUST_7381_PI428311958	0	lncRNA	NA	rn4_all_mrna_FQ227588 range=chr11:25501749-25502650 5'pad=0 3'pad=0 strand=- repeatMasking=none	seq7457	FQ227588	NA	chr11	-	25501749	25502650_x000D_
CUST_2122_PI428311958	4.83844	A	6.37365	P	0.345029	2.89831	down	0	CUST_2122_PI428311958	0	lncRNA	NA	"chr13|mm9_knownGene_uc007dwj.2| strand:+ 96377766-96377829,96384986-96385018,96387426-96387520,96388391-96388491,96393821-96393956,96396280-96396405,96400759-96400839,96422919-96423249,96423251-96423405,"	seq2128	uc007dwj.2	NA	chr13	+	96377768	96423408_x000D_
CUST_8109_PI428311958	14.5938	P	16.1288	P	0.345058	2.89806	down	0	CUST_8109_PI428311958	0	lncRNA	NA	rn4_all_mrna_L08800 range=chr15:26789869-26790125 5'pad=0 3'pad=0 strand=- repeatMasking=none	seq8195	L08800	NA	chr15	-	26789869	26790125_x000D_
CUST_7758_PI428311958	4.2618	A	5.79448	P	0.345635	2.89322	down	0	CUST_7758_PI428311958	0	lncRNA	NA	rn4_all_mrna_FQ227989 range=chr13:79845401-79846545 5'pad=0 3'pad=0 strand=+ repeatMasking=none	seq7836	FQ227989	NA	chr13	+	79845401	79846545_x000D_
CUST_8656_PI428311958	7.69866	P	9.22924	P	0.346138	2.88902	down	0	CUST_8656_PI428311958	0	lncRNA	NA	rn4_all_mrna_BC078834 range=chr18:35866177-36183654 5'pad=0 3'pad=0 strand=- repeatMasking=none	seq8749	BC078834	NA	chr18	-	35866177	36183654_x000D_
CUST_7442_PI428311958	9.1042	P	10.6331	P	0.346546	2.88562	down	0	CUST_7442_PI428311958	0	lncRNA	NA	rn4_all_mrna_FQ220706 range=chr11:64680823-64682095 5'pad=0 3'pad=0 strand=- repeatMasking=none	seq7518	FQ220706	NA	chr11	-	64680823	64682095_x000D_
CUST_1672_PI428311958	14.3601	P	15.8876	P	0.346861	2.883	down	0	CUST_1672_PI428311958	0	lncRNA	NA	"chr5|ri|1700066P05|ZX00075L08|363| strand:+ 136451990-136452199,136452792-136452882,136452884-136452919,"	seq1678	ZX00075L08	NA	chr5	+	136451984	136452912_x000D_
CUST_982_PI428311958	5.78349	P	7.30872	P	0.347424	2.87832	down	0	CUST_982_PI428311958	0	lncRNA	NA	"chr3|mm9_knownGene_uc012cae.1| strand:- 87268924-87269070,87214881-87215015,"	seq985	uc012cae.1	NA	chr3	-	87214881	87269070_x000D_
CUST_7992_PI428311958	7.12386	P	8.64542	P	0.348308	2.87102	down	0	CUST_7992_PI428311958	0	lncRNA	NA	rn4_all_mrna_BC128764 range=chr14:87964702-87967171 5'pad=0 3'pad=0 strand=- repeatMasking=none	seq8075	BC128764	NA	chr14	-	87964702	87967171_x000D_
CUST_8888_PI428311958	6.09127	P	7.61022	P	0.34894	2.86582	down	0	CUST_8888_PI428311958	0	lncRNA	NA	rn4_all_mrna_FQ220836 range=chr19:36343788-36373142 5'pad=0 3'pad=0 strand=+ repeatMasking=none	seq8984	FQ220836	NA	chr19	+	36343788	36373142_x000D_
CUST_3997_PI428311958	8.39918	P	9.9157	P	0.349527	2.86101	down	0	CUST_3997_PI428311958	0	lncRNA	NA	rn4_all_mrna_FQ224293 range=chr2:84721935-84724937 5'pad=0 3'pad=0 strand=- repeatMasking=none	seq4019	FQ224293	NA	chr2	-	84721935	84724937_x000D_
CUST_3436_PI428311958	3.94373	A	5.45397	P	0.351053	2.84858	down	0	CUST_3436_PI428311958	0	lncRNA	NA	rn4_all_mrna_FQ227650 range=chr1:87902395-87903173 5'pad=0 3'pad=0 strand=+ repeatMasking=none	seq3448	FQ227650	NA	chr1	+	87902395	87903173_x000D_
CUST_7142_PI428311958	6.02486	P	7.53349	P	0.351445	2.84539	down	0	CUST_7142_PI428311958	0	lncRNA	NA	rn4_all_mrna_DQ223059 range=chr10:62479636-62481079 5'pad=0 3'pad=0 strand=+ repeatMasking=none	seq7215	DQ223059	NA	chr10	+	62479636	62481079_x000D_
CUST_9254_PI428311958	6.15321	P	7.66098	P	0.351656	2.84369	down	0	CUST_9254_PI428311958	0	lncRNA	NA	"gi|293343015|ref|XR_085666.1| PREDICTED: Rattus norvegicus similar to Nucleoside diphosphate kinase homolog 5 (NDK-H 5) (NDP kinase homolog 5) (nm23-M5) (LOC688903), miscRNA"	seq9355	XR_085666.1	NA	NA	NA	NA	NA_x000D_
CUST_4690_PI428311958	3.81638	A	5.32276	P	0.351993	2.84097	down	0	CUST_4690_PI428311958	0	lncRNA	NA	rn4_all_mrna_FQ212828 range=chr3:155384891-155390315 5'pad=0 3'pad=0 strand=+ repeatMasking=none	seq4719	FQ212828	NA	chr3	+	155384891	155390315_x000D_
CUST_3996_PI428311958	8.29185	P	9.79686	P	0.352326	2.83828	down	0	CUST_3996_PI428311958	0	lncRNA	NA	rn4_all_mrna_FQ221783 range=chr2:84721922-84724707 5'pad=0 3'pad=0 strand=- repeatMasking=none	seq4018	FQ221783	NA	chr2	-	84721922	84724707_x000D_
CUST_6113_PI428311958	4.60104	A	6.10358	P	0.352931	2.83341	down	0	CUST_6113_PI428311958	0	lncRNA	NA	rn4_all_mrna_AY212290 range=chr7:124032976-124033462 5'pad=0 3'pad=0 strand=- repeatMasking=none	seq6170	AY212290	NA	chr7	-	124032976	124033462_x000D_
CUST_7542_PI428311958	4.43328	A	5.93549	P	0.353013	2.83276	down	0	CUST_7542_PI428311958	0	lncRNA	NA	rn4_all_mrna_FQ232371 range=chr12:11071090-11072087 5'pad=0 3'pad=0 strand=- repeatMasking=none	seq7618	FQ232371	NA	chr12	-	11071090	11072087_x000D_
CUST_984_PI428311958	6.03355	P	7.53268	P	0.353768	2.82671	down	0	CUST_984_PI428311958	0	lncRNA	NA	"chr7|mm9_knownGene_uc007xxf.1| strand:+ 141782281-141782380,141783187-141783192,141796609-141797139,141797141-141797145,141797146-141797150,141797153-141797164,141797165-141797799,141797905-141797953,141798275-141798669,141798670-141798720,141798721-141798729,141798733-141798819,141798821-141798879,141798883-141798886,141798888-141798935,141798936-141798950,141798952-141799077,141799079-14179914…	seq987	uc007xxf.1	NA	chr7	+	141782281	141799476_x000D_
CUST_5563_PI428311958	5.14094	A	6.63927	P	0.353963	2.82515	down	0	CUST_5563_PI428311958	0	lncRNA	NA	rn4_all_mrna_FQ215639 range=chr6:2132426-2134109 5'pad=0 3'pad=0 strand=+ repeatMasking=none	seq5613	FQ215639	NA	chr6	+	2132426	2134109_x000D_
CUST_5338_PI428311958	6.66317	P	8.16073	P	0.35415	2.82366	down	0	CUST_5338_PI428311958	0	lncRNA	NA	rn4_all_mrna_FQ218810 range=chr5:121099486-121100404 5'pad=0 3'pad=0 strand=+ repeatMasking=none	seq5383	FQ218810	NA	chr5	+	121099486	121100404_x000D_
CUST_8654_PI428311958	4.7547	A	6.24501	P	0.355937	2.80948	down	0	CUST_8654_PI428311958	0	lncRNA	NA	rn4_all_mrna_BC085793 range=chr18:29683387-29927274 5'pad=0 3'pad=0 strand=+ repeatMasking=none	seq8747	BC085793	NA	chr18	+	29683387	29927274_x000D_
CUST_3706_PI428311958	9.68841	P	11.175	P	0.356846	2.80233	down	0	CUST_3706_PI428311958	0	lncRNA	NA	rn4_all_mrna_FQ220597 range=chr1:213557332-213560358 5'pad=0 3'pad=0 strand=- repeatMasking=none	seq3723	FQ220597	NA	chr1	-	213557332	213560358_x000D_
CUST_2458_PI428311958	5.50316	P	6.98673	P	0.357603	2.7964	down	0	CUST_2458_PI428311958	0	lncRNA	NA	"chr17|mm9_knownGene_uc008igw.1| strand:+ 82958903-82959037,82970654-82970812,"	seq2466	uc008igw.1	NA	chr17	+	82958904	82970816_x000D_
CUST_6120_PI428311958	5.62748	P	7.1101	P	0.357838	2.79456	down	0	CUST_6120_PI428311958	0	lncRNA	NA	rn4_all_mrna_BC168217 range=chr7:130244061-130268203 5'pad=0 3'pad=0 strand=+ repeatMasking=none	seq6177	BC168217	NA	chr7	+	130244061	130268203_x000D_
CUST_4117_PI428311958	5.18257	A	6.66078	P	0.358933	2.78603	down	0	CUST_4117_PI428311958	0	lncRNA	NA	rn4_all_mrna_FQ209662 range=chr2:174732420-174734596 5'pad=0 3'pad=0 strand=+ repeatMasking=none	seq4140	FQ209662	NA	chr2	+	174732420	174734596_x000D_
CUST_6157_PI428311958	11.3984	P	12.8743	P	0.35951	2.78157	down	0	CUST_6157_PI428311958	0	lncRNA	NA	rn4_all_mrna_D78159 range=chr7:140622185-140622445 5'pad=0 3'pad=0 strand=- repeatMasking=none	seq6214	D78159	NA	chr7	-	140622185	140622445_x000D_
CUST_795_PI428311958	7.67887	P	9.15083	P	0.360494	2.77397	down	0	CUST_795_PI428311958	0	lncRNA	NA	"chr10|mm9_knownGene_uc011xsy.1| strand:- 18404437-18404586,18399992-18400082,18393895-18394061,18393881-18393887,18386682-18386686,18384968-18385021,18379616-18379720,18377775-18377940,18375231-18375305,18372385-18372495,18370405-18370551,18369452-18369619,18341420-18341530,18329743-18329878,18221558-18221631,18220518-18220598,"	seq798	uc011xsy.1	NA	chr10	-	18220518	18404586_x000D_
CUST_4059_PI428311958	8.08523	P	9.55457	P	0.361147	2.76896	down	0	CUST_4059_PI428311958	0	lncRNA	NA	rn4_all_mrna_AY237129 range=chr2:127822774-127830209 5'pad=0 3'pad=0 strand=- repeatMasking=none	seq4082	AY237129	NA	chr2	-	127822774	127830209_x000D_
CUST_4863_PI428311958	4.32075	A	5.78706	P	0.361906	2.76315	down	0	CUST_4863_PI428311958	0	lncRNA	NA	rn4_all_mrna_AB049626 range=chr4:62124691-62126528 5'pad=0 3'pad=0 strand=+ repeatMasking=none	seq4895	AB049626	NA	chr4	+	62124691	62126528_x000D_
CUST_3844_PI428311958	4.42912	A	5.89524	P	0.361954	2.76278	down	0	CUST_3844_PI428311958	0	lncRNA	NA	rn4_all_mrna_FQ216498 range=chr2:52505560-52761114 5'pad=0 3'pad=0 strand=- repeatMasking=none	seq3864	FQ216498	NA	chr2	-	52505560	52761114_x000D_
CUST_8627_PI428311958	8.28927	P	9.74861	P	0.363658	2.74984	down	0	CUST_8627_PI428311958	0	lncRNA	NA	rn4_all_mrna_AF169013 range=chr17:82985979-83027172 5'pad=0 3'pad=0 strand=+ repeatMasking=none	seq8719	AF169013	NA	chr17	+	82985979	83027172_x000D_
CUST_71_PI428311958	9.13597	P	10.5891	P	0.365235	2.73796	down	0	CUST_71_PI428311958	0	lncRNA	NA	"chr14|ri|1110036H20|R000017J18|594| strand:+ 3241737-3241862,3241864-3242003,3242010-3242019,3242022-3242152,3242155-3242326,"	seq71	R000017J18	NA	chr14	+	3241737	3242326_x000D_
CUST_3342_PI428311958	12.9183	P	14.3695	P	0.365722	2.73431	down	0	CUST_3342_PI428311958	0	lncRNA	NA	rn4_all_mrna_BC166440 range=chr1:47592824-47616639 5'pad=0 3'pad=0 strand=+ repeatMasking=none	seq3354	BC166440	NA	chr1	+	47592824	47616639_x000D_
CUST_874_PI428311958	8.59032	P	10.0409	P	0.36588	2.73314	down	0	CUST_874_PI428311958	0	lncRNA	NA	"chr3|gi|377836415|ref|XR_141387.1|| strand:- 154313058-154313135,154299455-154299523,154298553-154299432,154298495-154298518,"	seq877	XR_141387.1	NA	chr3	-	154298495	154313135_x000D_
CUST_9391_PI428311958	4.24566	A	5.6956	P	0.366037	2.73197	down	0	CUST_9391_PI428311958	0	lncRNA	NA	"gi|293349331|ref|XR_007793.2| PREDICTED: Rattus norvegicus similar to RIKEN cDNA 2410146L05 (RGD1311103), miscRNA"	seq9492	XR_007793.2	NA	NA	NA	NA	NA_x000D_
CUST_6762_PI428311958	8.23957	P	9.68841	P	0.366316	2.72989	down	0	CUST_6762_PI428311958	0	lncRNA	NA	rn4_all_mrna_AF130121 range=chrX:9720501-9825350 5'pad=0 3'pad=0 strand=- repeatMasking=none	seq6830	AF130121	NA	chrX	-	9720501	9825350_x000D_
CUST_5017_PI428311958	4.23641	A	5.6836	P	0.366736	2.72676	down	0	CUST_5017_PI428311958	0	lncRNA	NA	rn4_all_mrna_AB074423 range=chr4:125423363-125434192 5'pad=0 3'pad=0 strand=+ repeatMasking=none	seq5051	AB074423	NA	chr4	+	125423363	125434192_x000D_
CUST_7642_PI428311958	7.96552	P	9.40818	P	0.367888	2.71822	down	0	CUST_7642_PI428311958	0	lncRNA	NA	rn4_all_mrna_AF287357 range=chr13:70849038-70952160 5'pad=0 3'pad=0 strand=- repeatMasking=none	seq7720	AF287357	NA	chr13	-	70849038	70952160_x000D_
CUST_601_PI428311958	8.15583	P	9.59613	P	0.368491	2.71377	down	0	CUST_601_PI428311958	0	lncRNA	NA	"chr5|mm9_knownGene_uc008vzg.1| strand:+ 169315572-169315645,169316344-169316420,169331106-169331237,169332054-169332154,169332477-169332537,169332844-169332936,169333389-169333517,169333796-169333945,169335145-169335152,169335153-169335241,169335264-169335335,169335427-169335534,169335535-169335616,169335853-169335948,169336564-169336614,169336806-169336955,169337225-169337335,169337429-16933757…	seq603	uc008vzg.1	NA	chr5	+	169315572	169344128_x000D_
CUST_5159_PI428311958	6.21217	P	7.64893	P	0.369394	2.70713	down	0	CUST_5159_PI428311958	0	lncRNA	NA	rn4_all_mrna_FQ215485 range=chr5:101414063-101456646 5'pad=0 3'pad=0 strand=+ repeatMasking=none	seq5199	FQ215485	NA	chr5	+	101414063	101456646_x000D_
CUST_8026_PI428311958	4.18625	A	5.61969	P	0.370245	2.70091	down	0	CUST_8026_PI428311958	0	lncRNA	NA	rn4_all_mrna_FQ233449 range=chr14:110526453-110528048 5'pad=0 3'pad=0 strand=+ repeatMasking=none	seq8110	FQ233449	NA	chr14	+	110526453	110528048_x000D_
CUST_1846_PI428311958	8.29681	P	9.70604	P	0.376513	2.65595	down	0	CUST_1846_PI428311958	0	lncRNA	NA	"chr1|gi|377835352|ref|XR_140807.1|| strand:+ 85981894-85981994,85982031-85982048,85982055-85982092,85982094-85982105,85982108-85982418,85982419-85982464,"	seq1852	XR_140807.1	NA	chr1	+	85981896	85982464_x000D_
CUST_539_PI428311958	8.3022	P	9.70849	P	0.377279	2.65056	down	0	CUST_539_PI428311958	0	lncRNA	NA	"chr12|mm9_knownGene_uc012ecx.1| strand:+ 35505846-35505890,35505891-35506063,35506190-35506293,35509283-35509403,35519435-35519565,35521092-35521239,35523389-35523490,35525933-35526045,35529739-35529876,35530722-35530847,35531980-35532128,35532724-35532886,35535842-35535961,35536642-35536789,35536807-35536817,35536825-35536856,35536891-35536910,35536915-35536925,35536930-35536950,"	seq541	uc012ecx.1	NA	chr12	+	35505846	35536950_x000D_
CUST_1187_PI428311958	5.37104	P	6.77569	P	0.377708	2.64755	down	0	CUST_1187_PI428311958	0	lncRNA	NA	"chr14|gi|153792712|ref|NR_003639.1|| strand:- 2471287-2471291,2471281-2471286,2471239-2471279,2470609-2471238,2470562-2470601,2470520-2470560,2470439-2470518,2470340-2470430,2470330-2470339,2470283-2470325,2470275-2470282,2470238-2470274,2470223-2470229,2470123-2470217,2470035-2470113,2469935-2470034,2469789-2469931,"	seq1190	NR_003639.1	NA	chr14	-	2469789	2471291_x000D_
CUST_6915_PI428311958	9.00328	P	10.3988	P	0.380116	2.63078	down	0	CUST_6915_PI428311958	0	lncRNA	NA	rn4_all_mrna_M26196 range=chr10:72467827-72483871 5'pad=0 3'pad=0 strand=+ repeatMasking=none	seq6987	M26196	NA	chr10	+	72467827	72483871_x000D_
CUST_9802_PI428311958	9.53301	P	10.9262	P	0.380725	2.62657	down	0	CUST_9802_PI428311958	0	lncRNA	NA	"gi|295852602|ref|XR_086354.2| PREDICTED: Rattus norvegicus similar to GTPase activating protein testicular GAP1 (LOC691811), miscRNA"	seq9903	XR_086354.2	NA	NA	NA	NA	NA_x000D_
CUST_3923_PI428311958	4.13793	A	5.52274	P	0.382941	2.61137	down	0	CUST_3923_PI428311958	0	lncRNA	NA	rn4_all_mrna_AJ271303 range=chr2:31199267-31248236 5'pad=0 3'pad=0 strand=- repeatMasking=none	seq3944	AJ271303	NA	chr2	-	31199267	31248236_x000D_
CUST_6_PI428311958	8.39492	P	9.77519	P	0.384146	2.60318	down	0	CUST_6_PI428311958	0	lncRNA	NA	"chr10|gi|377835773|ref|XR_141042.1|| strand:+ 15554913-15554967,15570977-15571128,"	seq6	XR_141042.1	NA	chr10	+	15554913	15571128_x000D_
CUST_3867_PI428311958	5.33921	A	6.71946	P	0.38415	2.60315	down	0	CUST_3867_PI428311958	0	lncRNA	NA	rn4_all_mrna_FQ215630 range=chr2:240243135-240296914 5'pad=0 3'pad=0 strand=- repeatMasking=none	seq3888	FQ215630	NA	chr2	-	240243135	240296914_x000D_
CUST_307_PI428311958	4.6799	A	6.05921	P	0.384401	2.60145	down	0	CUST_307_PI428311958	0	lncRNA	NA	"chr4|gi|309265592|ref|XR_107800.1|| strand:+ 81616140-81616293,81616297-81616424,81616574-81616579,81616582-81616640,"	seq308	XR_107800.1	NA	chr4	+	81616144	81616640_x000D_
CUST_9250_PI428311958	4.21329	A	5.59142	P	0.384717	2.59931	down	0	CUST_9250_PI428311958	0	lncRNA	NA	"gi|293342679|ref|XR_085656.1| PREDICTED: Rattus norvegicus nucleolar protein 7 (Nol7), miscRNA"	seq9351	XR_085656.1	NA	NA	NA	NA	NA_x000D_
CUST_9530_PI428311958	10.3752	P	11.7474	P	0.386285	2.58876	down	0	CUST_9530_PI428311958	0	lncRNA	NA	"gi|295851607|ref|XR_008976.3| PREDICTED: Rattus norvegicus similar to Leukosialin precursor (Leucocyte sialoglycoprotein) (Sialophorin) (Ly-48) (B cell differentiation antigen LP-3) (CD43 antigen) (LOC501810), miscRNA"	seq9631	XR_008976.3	NA	NA	NA	NA	NA_x000D_
CUST_9115_PI428311958	4.26275	A	5.63057	P	0.387476	2.58081	down	0	CUST_9115_PI428311958	0	lncRNA	NA	rn4_all_mrna_FQ211796 range=chrUn:37696616-37697512 5'pad=0 3'pad=0 strand=+ repeatMasking=none	seq9215	FQ211796	NA	chrUn	+	37696616	37697512_x000D_
CUST_4470_PI428311958	8.45524	P	9.82191	P	0.387784	2.57875	down	0	CUST_4470_PI428311958	0	lncRNA	NA	rn4_all_mrna_BC168937 range=chr3:47023654-47035380 5'pad=0 3'pad=0 strand=- repeatMasking=none	seq4497	BC168937	NA	chr3	-	47023654	47035380_x000D_
CUST_4418_PI428311958	9.69513	P	11.0568	P	0.389135	2.5698	down	0	CUST_4418_PI428311958	0	lncRNA	NA	rn4_all_mrna_FQ213095 range=chr3:18784887-18787996 5'pad=0 3'pad=0 strand=+ repeatMasking=none	seq4444	FQ213095	NA	chr3	+	18784887	18787996_x000D_
CUST_7508_PI428311958	9.49823	P	10.8584	P	0.389531	2.56719	down	0	CUST_7508_PI428311958	0	lncRNA	NA	rn4_all_mrna_BC166500 range=chr12:4560543-4606802 5'pad=0 3'pad=0 strand=+ repeatMasking=none	seq7584	BC166500	NA	chr12	+	4560543	4606802_x000D_
CUST_6046_PI428311958	3.88083	A	5.24006	P	0.389789	2.56549	down	0	CUST_6046_PI428311958	0	lncRNA	NA	rn4_all_mrna_FQ226358 range=chr7:103217300-103218594 5'pad=0 3'pad=0 strand=+ repeatMasking=none	seq6102	FQ226358	NA	chr7	+	103217300	103218594_x000D_
CUST_8409_PI428311958	5.77479	P	7.13117	P	0.390562	2.56041	down	0	CUST_8409_PI428311958	0	lncRNA	NA	rn4_all_mrna_FQ212538 range=chr16:80913638-80914736 5'pad=0 3'pad=0 strand=+ repeatMasking=none	seq8500	FQ212538	NA	chr16	+	80913638	80914736_x000D_
CUST_9806_PI428311958	7.33282	P	8.68869	P	0.390699	2.55952	down	0	CUST_9806_PI428311958	0	lncRNA	NA	"gi|295852611|ref|XR_007015.3| PREDICTED: Rattus norvegicus similar to Nidogen-2 precursor (NID-2) (Osteonidogen) (LOC363417), miscRNA"	seq9907	XR_007015.3	NA	NA	NA	NA	NA_x000D_
CUST_9170_PI428311958	9.61198	P	10.9656	P	0.391313	2.5555	down	0	CUST_9170_PI428311958	0	lncRNA	NA	rn4_all_mrna_FQ217833 range=chrX_random:775138-781671 5'pad=0 3'pad=0 strand=+ repeatMasking=none	seq9271	FQ217833	NA	chrX_random	+	775138	781671_x000D_
CUST_4377_PI428311958	6.00138	P	7.35457	P	0.391427	2.55476	down	0	CUST_4377_PI428311958	0	lncRNA	NA	rn4_all_mrna_AJ005394 range=chr3:6959786-6971556 5'pad=0 3'pad=0 strand=+ repeatMasking=none	seq4403	AJ005394	NA	chr3	+	6959786	6971556_x000D_
CUST_9358_PI428311958	5.17571	P	6.52652	P	0.392071	2.55056	down	0	CUST_9358_PI428311958	0	lncRNA	NA	"gi|293347724|ref|XR_009630.2| PREDICTED: Rattus norvegicus perlecan (LOC313641), miscRNA"	seq9459	XR_009630.2	NA	NA	NA	NA	NA_x000D_
CUST_2981_PI428311958	10.2677	P	11.6156	P	0.392875	2.54534	down	0	CUST_2981_PI428311958	0	lncRNA	NA	uc.247+	seq2990	uc.247+	NA	chr1	+	229037680	229038032_x000D_
CUST_8700_PI428311958	6.92128	P	8.2689	P	0.392942	2.54491	down	0	CUST_8700_PI428311958	0	lncRNA	NA	rn4_all_mrna_FQ225131 range=chr18:25863652-25864746 5'pad=0 3'pad=0 strand=- repeatMasking=none	seq8795	FQ225131	NA	chr18	-	25863652	25864746_x000D_
CUST_4462_PI428311958	3.9141	A	5.26053	P	0.393265	2.54282	down	0	CUST_4462_PI428311958	0	lncRNA	NA	rn4_all_mrna_FQ231758 range=chr3:42660462-42661583 5'pad=0 3'pad=0 strand=- repeatMasking=none	seq4489	FQ231758	NA	chr3	-	42660462	42661583_x000D_
CUST_3236_PI428311958	10.5321	P	11.8778	P	0.39347	2.54149	down	0	CUST_3236_PI428311958	0	lncRNA	NA	rn4_all_mrna_FQ234578 range=chr1:81916664-82162223 5'pad=0 3'pad=0 strand=- repeatMasking=none	seq3248	FQ234578	NA	chr1	-	81916664	82162223_x000D_
CUST_8619_PI428311958	5.22237	A	6.56632	P	0.39394	2.53846	down	0	CUST_8619_PI428311958	0	lncRNA	NA	rn4_all_mrna_FQ230500 range=chr17:82811378-82816766 5'pad=0 3'pad=0 strand=+ repeatMasking=none	seq8711	FQ230500	NA	chr17	+	82811378	82816766_x000D_
CUST_2291_PI428311958	6.06596	P	7.4095	P	0.394054	2.53773	down	0	CUST_2291_PI428311958	0	lncRNA	NA	"chr3|mm9_knownGene_uc008nps.1| strand:- 148859189-148859346,148854556-148854799,148849870-148849932,148848068-148848196,148847028-148847205,148844882-148845017,148844189-148844293,148842882-148843123,148841939-148841945,148840309-148840570,148836307-148836469,148835422-148835426,148835376-148835378,148835254-148835375,148835119-148835121,148834248-148834408,148834235-148834244,148834220-14883423…	seq2297	uc008nps.1	NA	chr3	-	148833504	148859344_x000D_
CUST_7397_PI428311958	8.32991	P	9.67342	P	0.394062	2.53767	down	0	CUST_7397_PI428311958	0	lncRNA	NA	rn4_all_mrna_FQ221091 range=chr11:32277514-32282701 5'pad=0 3'pad=0 strand=+ repeatMasking=none	seq7473	FQ221091	NA	chr11	+	32277514	32282701_x000D_
CUST_1537_PI428311958	5.8694	P	7.20894	P	0.395147	2.53071	down	0	CUST_1537_PI428311958	0	lncRNA	NA	"chr1|mm9_knownGene_uc008giq.1| strand:+ 209186194-209186256,209186623-209186829,"	seq1543	uc008giq.1	NA	chr1	+	209186192	209186832_x000D_
CUST_2367_PI428311958	9.80928	P	11.147	P	0.395656	2.52745	down	0	CUST_2367_PI428311958	0	lncRNA	NA	"chr12|mm9_knownGene_uc012eer.1| strand:- 21797949-21798038,21796467-21796576,21796419-21796465,21781747-21782086,21779641-21780277,21770573-21770678,21768117-21768136,21765196-21765333,21763292-21763365,21762630-21762788,21760846-21761007,21760178-21760267,21758843-21759071,21758824-21758835,21758722-21758803,21758704-21758721,21758695-21758700,21758645-21758693,21758601-21758641,21758593-217585…	seq2375	uc012eer.1	NA	chr12	-	21758490	21798038_x000D_
CUST_8629_PI428311958	5.43206	P	6.76753	P	0.396262	2.52358	down	0	CUST_8629_PI428311958	0	lncRNA	NA	rn4_all_mrna_FQ232363 range=chr17:83017784-83018858 5'pad=0 3'pad=0 strand=+ repeatMasking=none	seq8721	FQ232363	NA	chr17	+	83017784	83018858_x000D_
CUST_1017_PI428311958	13.2264	P	14.5616	P	0.396347	2.52304	down	0	CUST_1017_PI428311958	0	lncRNA	NA	"chr20|mm9_knownGene_uc007evs.1| strand:- 43279929-43280001,43278415-43278505,43278376-43278414,43269706-43269861,43268008-43268143,43266772-43267000,"	seq1020	uc007evs.1	NA	chr20	-	43266772	43280000_x000D_
CUST_1027_PI428311958	10.5222	P	11.8573	P	0.396369	2.5229	down	0	CUST_1027_PI428311958	0	lncRNA	NA	"chr1|mm9_knownGene_uc009ght.2| strand:- 86096604-86096701,86095714-86095763,86095519-86095573,86095258-86095395,"	seq1030	uc009ght.2	NA	chr1	-	86095256	86096704_x000D_
CUST_2525_PI428311958	10.1731	P	11.5022	P	0.39803	2.51237	down	0	CUST_2525_PI428311958	0	lncRNA	NA	"chr14|mm9_knownGene_uc008ylo.1| strand:+ 3779051-3779181,3795274-3795409,3795426-3795464,3795465-3795491,3795500-3795508,3795517-3795541,3795548-3795576,"	seq2534	uc008ylo.1	NA	chr14	+	3779051	3795576_x000D_
CUST_7382_PI428311958	4.28414	A	5.61086	P	0.398672	2.50833	down	0	CUST_7382_PI428311958	0	lncRNA	NA	rn4_all_mrna_BC083615 range=chr11:25502369-25509522 5'pad=0 3'pad=0 strand=- repeatMasking=none	seq7458	BC083615	NA	chr11	-	25502369	25509522_x000D_
CUST_8634_PI428311958	7.5443	P	8.8699	P	0.398982	2.50638	down	0	CUST_8634_PI428311958	0	lncRNA	NA	rn4_all_mrna_FQ223996 range=chr17:84333769-84336611 5'pad=0 3'pad=0 strand=- repeatMasking=none	seq8726	FQ223996	NA	chr17	-	84333769	84336611_x000D_
CUST_2487_PI428311958	12.0356	P	13.3606	P	0.399161	2.50526	down	0	CUST_2487_PI428311958	0	lncRNA	NA	"chr1|ri|1700015G11|ZX00037G15|384| strand:- 101822743-101822746,101822670-101822741,101821879-101821923,101820520-101820608,101818929-101818966,101818830-101818928,"	seq2495	ZX00037G15	NA	chr1	-	101818832	101822744_x000D_
CUST_8061_PI428311958	4.09047	A	5.41497	P	0.399285	2.50447	down	0	CUST_8061_PI428311958	0	lncRNA	NA	rn4_all_mrna_FQ233247 range=chr15:38462072-38564824 5'pad=0 3'pad=0 strand=- repeatMasking=none	seq8146	FQ233247	NA	chr15	-	38462072	38564824_x000D_
CUST_6110_PI428311958	11.3554	P	12.6763	P	0.4003	2.49813	down	0	CUST_6110_PI428311958	0	lncRNA	NA	rn4_all_mrna_BC098850 range=chr7:122969934-122976090 5'pad=0 3'pad=0 strand=- repeatMasking=none	seq6167	BC098850	NA	chr7	-	122969934	122976090_x000D_
CUST_8429_PI428311958	6.19689	P	7.51557	P	0.400902	2.49437	down	0	CUST_8429_PI428311958	0	lncRNA	NA	rn4_all_mrna_U35099 range=chr17:16314590-16386078 5'pad=0 3'pad=0 strand=- repeatMasking=none	seq8520	U35099	NA	chr17	-	16314590	16386078_x000D_
CUST_9330_PI428311958	4.91959	A	6.23809	P	0.400951	2.49407	down	0	CUST_9330_PI428311958	0	lncRNA	NA	"gi|293346478|ref|XR_008761.2| PREDICTED: Rattus norvegicus similar to TP53-target gene 5 protein (TP53-inducible gene 5 protein) (RGD1561934), miscRNA"	seq9431	XR_008761.2	NA	NA	NA	NA	NA_x000D_
CUST_4435_PI428311958	4.33778	A	5.65303	P	0.401856	2.48845	down	0	CUST_4435_PI428311958	0	lncRNA	NA	rn4_all_mrna_FQ234221 range=chr3:25637008-25638019 5'pad=0 3'pad=0 strand=- repeatMasking=none	seq4461	FQ234221	NA	chr3	-	25637008	25638019_x000D_
CUST_5063_PI428311958	6.2362	P	7.54913	P	0.402504	2.48445	down	0	CUST_5063_PI428311958	0	lncRNA	NA	rn4_all_mrna_BC158892 range=chr4:151972171-151981942 5'pad=0 3'pad=0 strand=- repeatMasking=none	seq5097	BC158892	NA	chr4	-	151972171	151981942_x000D_
CUST_5125_PI428311958	8.02751	P	9.33241	P	0.404749	2.47066	down	0	CUST_5125_PI428311958	0	lncRNA	NA	rn4_all_mrna_BC083615 range=chr4:173862481-173873882 5'pad=0 3'pad=0 strand=+ repeatMasking=none	seq5162	BC083615	NA	chr4	+	173862481	173873882_x000D_
CUST_3177_PI428311958	4.28837	A	5.5913	P	0.405301	2.4673	down	0	CUST_3177_PI428311958	0	lncRNA	NA	uc.449+	seq3186	uc.449+	NA	chr1	-	89995848	89996136_x000D_
CUST_8328_PI428311958	8.09598	P	9.39831	P	0.40547	2.46627	down	0	CUST_8328_PI428311958	0	lncRNA	NA	rn4_all_mrna_FQ228377 range=chr16:19312460-19319241 5'pad=0 3'pad=0 strand=- repeatMasking=none	seq8418	FQ228377	NA	chr16	-	19312460	19319241_x000D_
CUST_6846_PI428311958	8.99096	P	10.2895	P	0.40653	2.45984	down	0	CUST_6846_PI428311958	0	lncRNA	NA	rn4_all_mrna_FQ209732 range=chrX:93144242-93144506 5'pad=0 3'pad=0 strand=+ repeatMasking=none	seq6915	FQ209732	NA	chrX	+	93144242	93144506_x000D_
CUST_6610_PI428311958	5.94432	P	7.23875	P	0.407696	2.45281	down	0	CUST_6610_PI428311958	0	lncRNA	NA	rn4_all_mrna_FQ232734 range=chr9:58255657-58260231 5'pad=0 3'pad=0 strand=+ repeatMasking=none	seq6676	FQ232734	NA	chr9	+	58255657	58260231_x000D_
CUST_8176_PI428311958	3.99161	A	5.28301	P	0.408556	2.44765	down	0	CUST_8176_PI428311958	0	lncRNA	NA	rn4_all_mrna_FQ234890 range=chr15:40790745-40792055 5'pad=0 3'pad=0 strand=- repeatMasking=none	seq8264	FQ234890	NA	chr15	-	40790745	40792055_x000D_
CUST_8860_PI428311958	7.22858	P	8.5164	P	0.409568	2.4416	down	0	CUST_8860_PI428311958	0	lncRNA	NA	rn4_all_mrna_AM040233 range=chr19:25215972-25232376 5'pad=0 3'pad=0 strand=- repeatMasking=none	seq8956	AM040233	NA	chr19	-	25215972	25232376_x000D_
CUST_2796_PI428311958	3.94937	A	5.23623	P	0.409842	2.43997	down	0	CUST_2796_PI428311958	0	lncRNA	NA	uc.54+	seq2805	uc.54+	NA	chr14	-	106736616	106736824_x000D_
CUST_6830_PI428311958	9.63434	P	10.9204	P	0.41006	2.43867	down	0	CUST_6830_PI428311958	0	lncRNA	NA	rn4_all_mrna_BC083885 range=chrX:84964129-84964805 5'pad=0 3'pad=0 strand=- repeatMasking=none	seq6898	BC083885	NA	chrX	-	84964129	84964805_x000D_
CUST_6625_PI428311958	4.91517	A	6.19956	P	0.410543	2.4358	down	0	CUST_6625_PI428311958	0	lncRNA	NA	rn4_all_mrna_U30938 range=chr9:65255850-65259591 5'pad=0 3'pad=0 strand=+ repeatMasking=none	seq6691	U30938	NA	chr9	+	65255850	65259591_x000D_
CUST_3398_PI428311958	4.33297	A	5.61171	P	0.412156	2.42627	down	0	CUST_3398_PI428311958	0	lncRNA	NA	rn4_all_mrna_FQ226468 range=chr1:80976622-80985246 5'pad=0 3'pad=0 strand=- repeatMasking=none	seq3410	FQ226468	NA	chr1	-	80976622	80985246_x000D_
CUST_4857_PI428311958	4.48187	A	5.75665	P	0.413289	2.41962	down	0	CUST_4857_PI428311958	0	lncRNA	NA	rn4_all_mrna_FQ227189 range=chr4:59386900-59388146 5'pad=0 3'pad=0 strand=- repeatMasking=none	seq4889	FQ227189	NA	chr4	-	59386900	59388146_x000D_
CUST_5620_PI428311958	6.34473	P	7.61866	P	0.413533	2.41819	down	0	CUST_5620_PI428311958	0	lncRNA	NA	rn4_all_mrna_AY539931 range=chr6:27061135-27087288 5'pad=0 3'pad=0 strand=+ repeatMasking=none	seq5670	AY539931	NA	chr6	+	27061135	27087288_x000D_
CUST_8628_PI428311958	5.50924	P	6.77861	P	0.414841	2.41056	down	0	CUST_8628_PI428311958	0	lncRNA	NA	rn4_all_mrna_FQ227868 range=chr17:82998358-82999217 5'pad=0 3'pad=0 strand=+ repeatMasking=none	seq8720	FQ227868	NA	chr17	+	82998358	82999217_x000D_
CUST_2476_PI428311958	5.18206	A	6.45069	P	0.415056	2.40931	down	0	CUST_2476_PI428311958	0	lncRNA	NA	"chr7|mm9_knownGene_uc007wcc.1| strand:- 111105624-111105665,111105570-111105623,111103309-111103372,111103302-111103307,111103282-111103291,111103271-111103277,111068052-111068278,"	seq2484	uc007wcc.1	NA	chr7	-	111068048	111105664_x000D_
CUST_6410_PI428311958	4.54583	A	5.81312	P	0.41544	2.40708	down	0	CUST_6410_PI428311958	0	lncRNA	NA	rn4_all_mrna_FQ216427 range=chr8:101794162-101802543 5'pad=0 3'pad=0 strand=+ repeatMasking=none	seq6473	FQ216427	NA	chr8	+	101794162	101802543_x000D_
CUST_4047_PI428311958	8.54786	P	9.81277	P	0.416126	2.40312	down	0	CUST_4047_PI428311958	0	lncRNA	NA	rn4_all_mrna_FQ209587 range=chr2:122342363-122385293 5'pad=0 3'pad=0 strand=- repeatMasking=none	seq4070	FQ209587	NA	chr2	-	122342363	122385293_x000D_
CUST_281_PI428311958	5.47309	P	6.73569	P	0.416792	2.39928	down	0	CUST_281_PI428311958	0	lncRNA	NA	"chr14|gi|377835228|ref|XR_140728.1|| strand:- 6989131-6989583,6978968-6979116,6978852-6978967,6978780-6978840,6978772-6978779,"	seq282	XR_140728.1	NA	chr14	-	6978772	6989583_x000D_
CUST_3956_PI428311958	5.09952	A	6.36066	P	0.417217	2.39684	down	0	CUST_3956_PI428311958	0	lncRNA	NA	rn4_all_mrna_FQ219936 range=chr2:46541079-46541333 5'pad=0 3'pad=0 strand=- repeatMasking=none	seq3978	FQ219936	NA	chr2	-	46541079	46541333_x000D_
CUST_1174_PI428311958	13.183	P	14.4416	P	0.417947	2.39265	down	0	CUST_1174_PI428311958	0	lncRNA	NA	"chr1|mm9_knownGene_uc012eww.1| strand:+ 67810450-67810493,67810501-67810593,67810666-67810821,67811388-67811488,67811574-67811649,67811657-67811671,67811675-67811683,67811684-67811697,67811701-67811706,67811707-67811750,"	seq1177	uc012eww.1	NA	chr1	+	67810448	67811752_x000D_
CUST_7288_PI428311958	7.27839	P	8.53656	P	0.418074	2.39192	down	0	CUST_7288_PI428311958	0	lncRNA	NA	rn4_all_mrna_AB552846 range=chr10:94804307-94850442 5'pad=0 3'pad=0 strand=- repeatMasking=none	seq7363	AB552846	NA	chr10	-	94804307	94850442_x000D_
CUST_4507_PI428311958	5.52111	P	6.77842	P	0.418325	2.39049	down	0	CUST_4507_PI428311958	0	lncRNA	NA	rn4_all_mrna_S58528 range=chr3:67015340-67022272 5'pad=0 3'pad=0 strand=+ repeatMasking=none	seq4534	S58528	NA	chr3	+	67015340	67022272_x000D_
CUST_3718_PI428311958	5.94515	P	7.1981	P	0.419589	2.38328	down	0	CUST_3718_PI428311958	0	lncRNA	NA	rn4_all_mrna_FQ225915 range=chr1:220723911-220724801 5'pad=0 3'pad=0 strand=+ repeatMasking=none	seq3735	FQ225915	NA	chr1	+	220723911	220724801_x000D_
CUST_9050_PI428311958	6.78565	P	8.03462	P	0.420748	2.37672	down	0	CUST_9050_PI428311958	0	lncRNA	NA	rn4_all_mrna_BC090336 range=chr20:32581249-32603064 5'pad=0 3'pad=0 strand=- repeatMasking=none	seq9149	BC090336	NA	chr20	-	32581249	32603064_x000D_
CUST_8914_PI428311958	4.33163	A	5.57924	P	0.421145	2.37448	down	0	CUST_8914_PI428311958	0	lncRNA	NA	rn4_all_mrna_FQ231593 range=chr19:41791494-41792615 5'pad=0 3'pad=0 strand=- repeatMasking=none	seq9011	FQ231593	NA	chr19	-	41791494	41792615_x000D_
CUST_517_PI428311958	4.61993	A	5.86333	P	0.422378	2.36755	down	0	CUST_517_PI428311958	0	lncRNA	NA	"chrX|mm9_knownGene_uc009slg.2| strand:+ 27150813-27150932,27159363-27159488,27159493-27159813,27159826-27159912,27159939-27159995,27159998-27160030,"	seq519	uc009slg.2	NA	chrX	+	27150813	27160030_x000D_
CUST_1675_PI428311958	5.79348	P	7.03594	P	0.422651	2.36602	down	0	CUST_1675_PI428311958	0	lncRNA	NA	"chr1|mm9_knownGene_uc009jne.1| strand:+ 179743741-179743818,179744217-179744279,179749146-179749270,"	seq1681	uc009jne.1	NA	chr1	+	179743744	179749264_x000D_
CUST_4517_PI428311958	7.4526	P	8.6935	P	0.42311	2.36345	down	0	CUST_4517_PI428311958	0	lncRNA	NA	rn4_all_mrna_FQ232564 range=chr3:75952004-75953767 5'pad=0 3'pad=0 strand=+ repeatMasking=none	seq4544	FQ232564	NA	chr3	+	75952004	75953767_x000D_
CUST_6248_PI428311958	5.2438	A	6.4821	P	0.423873	2.3592	down	0	CUST_6248_PI428311958	0	lncRNA	NA	rn4_all_mrna_FQ212850 range=chr8:47031109-47032817 5'pad=0 3'pad=0 strand=+ repeatMasking=none	seq6311	FQ212850	NA	chr8	+	47031109	47032817_x000D_
CUST_3395_PI428311958	5.69051	P	6.92847	P	0.423971	2.35865	down	0	CUST_3395_PI428311958	0	lncRNA	NA	rn4_all_mrna_AY428844 range=chr1:80672613-80679724 5'pad=0 3'pad=0 strand=- repeatMasking=none	seq3407	AY428844	NA	chr1	-	80672613	80679724_x000D_
CUST_6468_PI428311958	9.73883	P	10.9764	P	0.424095	2.35796	down	0	CUST_6468_PI428311958	0	lncRNA	NA	rn4_all_mrna_FQ230200 range=chr8:123383682-123384388 5'pad=0 3'pad=0 strand=+ repeatMasking=none	seq6531	FQ230200	NA	chr8	+	123383682	123384388_x000D_
CUST_2422_PI428311958	10.5816	P	11.8177	P	0.424512	2.35564	down	0	CUST_2422_PI428311958	0	lncRNA	NA	"chr10|mm9_knownGene_uc007jok.2| strand:- 55686355-55686515,55686235-55686249,55685959-55686230,55682351-55682548,55681958-55682126,55681547-55681627,55681481-55681485,55681287-55681477,"	seq2430	uc007jok.2	NA	chr10	-	55681288	55686516_x000D_
CUST_9490_PI428311958	8.59099	P	9.826	P	0.424839	2.35383	down	0	CUST_9490_PI428311958	0	lncRNA	NA	"gi|293360099|ref|XR_086281.1| PREDICTED: Rattus norvegicus similar to GTL2, imprinted maternally expressed untranslated (RGD1566401), miscRNA"	seq9591	XR_086281.1	NA	NA	NA	NA	NA_x000D_
CUST_2299_PI428311958	8.81924	P	10.053	P	0.425195	2.35186	down	0	CUST_2299_PI428311958	0	lncRNA	NA	"chr15|mm9_knownGene_uc007uod.2| strand:- 50922336-50922418,50922206-50922328,50922151-50922204,50922141-50922147,50922029-50922140,50913909-50914022,50910911-50911073,50910619-50910738,50910165-50910380,50909643-50909748,50907586-50907710,50906943-50907058,50897886-50897988,50895594-50895710,50895249-50895394,50894915-50895110,50894163-50894286,50893392-50893553,50892863-50893043,50889851-508900…	seq2305	uc007uod.2	NA	chr15	-	50878144	50922416_x000D_
CUST_580_PI428311958	6.27927	P	7.51022	P	0.426037	2.34722	down	0	CUST_580_PI428311958	0	lncRNA	NA	"chr4|mm9_knownGene_uc012ejf.1| strand:+ 56653959-56654422,56688013-56688143,56708363-56708369,56708375-56708383,56708390-56708395,56708400-56708496,56708512-56708598,56708601-56708631,56708634-56708641,56708705-56708723,56753142-56753250,56759753-56759896,"	seq582	uc012ejf.1	NA	chr4	+	56653959	56759896_x000D_
CUST_9789_PI428311958	6.96547	P	8.19616	P	0.426114	2.34679	down	0	CUST_9789_PI428311958	0	lncRNA	NA	"gi|295852520|ref|XR_086303.2| PREDICTED: Rattus norvegicus epiplakin 1 (Eppk1), miscRNA"	seq9890	XR_086303.2	NA	NA	NA	NA	NA_x000D_
CUST_987_PI428311958	8.86182	P	10.0925	P	0.426131	2.34669	down	0	CUST_987_PI428311958	0	lncRNA	NA	"chr15|mm9_knownGene_uc007uob.2| strand:- 50910911-50911073,50910619-50910738,50910165-50910380,50909643-50909748,50907586-50907710,50906943-50907058,50897886-50897988,50895594-50895710,50895249-50895394,50894915-50895110,50894163-50894286,50893392-50893553,50892841-50893043,50892836-50892840,50892612-50892810,50892590-50892611,50892569-50892577,50892507-50892567,50892403-50892506,50892398-508924…	seq990	uc007uob.2	NA	chr15	-	50878143	50911073_x000D_
CUST_5018_PI428311958	4.70186	A	5.9319	P	0.426306	2.34573	down	0	CUST_5018_PI428311958	0	lncRNA	NA	rn4_all_mrna_AB074424 range=chr4:125423363-125434192 5'pad=0 3'pad=0 strand=+ repeatMasking=none	seq5052	AB074424	NA	chr4	+	125423363	125434192_x000D_
CUST_118_PI428311958	4.63613	A	5.86515	P	0.426608	2.34407	down	0	CUST_118_PI428311958	0	lncRNA	NA	"chr1|gi|377834336|ref|XR_142262.1|| strand:+ 161584856-161584874,161584888-161584906,161584910-161585117,161619717-161619947,"	seq118	XR_142262.1	NA	chr1	+	161584864	161619952_x000D_
CUST_4291_PI428311958	6.2711	P	7.49967	P	0.42674	2.34335	down	0	CUST_4291_PI428311958	0	lncRNA	NA	rn4_all_mrna_FQ221477 range=chr2:240466361-240487797 5'pad=0 3'pad=0 strand=+ repeatMasking=none	seq4316	FQ221477	NA	chr2	+	240466361	240487797_x000D_
CUST_6978_PI428311958	4.56764	A	5.79531	P	0.427008	2.34188	down	0	CUST_6978_PI428311958	0	lncRNA	NA	rn4_all_mrna_BC161824 range=chr10:15050348-15053050 5'pad=0 3'pad=0 strand=- repeatMasking=none	seq7051	BC161824	NA	chr10	-	15050348	15053050_x000D_
CUST_7482_PI428311958	9.67707	P	10.9001	P	0.428395	2.3343	down	0	CUST_7482_PI428311958	0	lncRNA	NA	rn4_all_mrna_BC128730 range=chr11:82714402-82748738 5'pad=0 3'pad=0 strand=+ repeatMasking=none	seq7558	BC128730	NA	chr11	+	82714402	82748738_x000D_
CUST_1088_PI428311958	8.59351	P	9.81638	P	0.42843	2.3341	down	0	CUST_1088_PI428311958	0	lncRNA	NA	"chr7|gi|377835687|ref|XR_140987.1|| strand:+ 28054654-28054828,28054831-28054994,28055081-28055185,"	seq1091	XR_140987.1	NA	chr7	+	28054654	28055184_x000D_
CUST_7855_PI428311958	5.67487	P	6.89771	P	0.42844	2.33405	down	0	CUST_7855_PI428311958	0	lncRNA	NA	rn4_all_mrna_FQ230491 range=chr14:110376724-110499879 5'pad=0 3'pad=0 strand=+ repeatMasking=none	seq7937	FQ230491	NA	chr14	+	110376724	110499879_x000D_
CUST_3121_PI428311958	4.29106	A	5.51366	P	0.428512	2.33366	down	0	CUST_3121_PI428311958	0	lncRNA	NA	uc.392+	seq3130	uc.392+	NA	chr8	-	65483332	65483588_x000D_
CUST_6166_PI428311958	4.34758	A	5.57015	P	0.428518	2.33362	down	0	CUST_6166_PI428311958	0	lncRNA	NA	rn4_all_mrna_AF327907 range=chr7:142426384-142427791 5'pad=0 3'pad=0 strand=+ repeatMasking=none	seq6224	AF327907	NA	chr7	+	142426384	142427791_x000D_
CUST_1650_PI428311958	4.89246	A	6.10541	P	0.431384	2.31812	down	0	CUST_1650_PI428311958	0	lncRNA	NA	"chr18|ri|5430430J18|PX00022E12|1239| strand:+ 66360689-66360979,66360985-66361027,66361028-66361076,66361082-66361098,66361109-66361159,66361160-66361171,66361172-66361176,66361178-66361191,66361200-66361265,66361275-66361621,66361629-66361708,66361713-66361881,66361887-66361939,"	seq1656	PX00022E12	NA	chr18	+	66360688	66361940_x000D_
CUST_1568_PI428311958	6.98442	P	8.1969	P	0.431525	2.31736	down	0	CUST_1568_PI428311958	0	lncRNA	NA	"chr14|mm9_knownGene_uc007ibc.1| strand:- 92911074-92911081,92911025-92911053,92910990-92911023,92910729-92910899,92910589-92910727,92910524-92910584,92869927-92870004,92853536-92853751,"	seq1574	uc007ibc.1	NA	chr14	-	92853536	92911080_x000D_
CUST_9570_PI428311958	7.80752	P	9.01844	P	0.431992	2.31486	down	0	CUST_9570_PI428311958	0	lncRNA	NA	"gi|295851705|ref|XR_085674.2| PREDICTED: Rattus norvegicus hypothetical LOC100365128 (LOC100365128), miscRNA"	seq9671	XR_085674.2	NA	NA	NA	NA	NA_x000D_
CUST_6660_PI428311958	5.03935	A	6.24581	P	0.433331	2.3077	down	0	CUST_6660_PI428311958	0	lncRNA	NA	rn4_all_mrna_FQ216728 range=chr9:81501824-81515918 5'pad=0 3'pad=0 strand=- repeatMasking=none	seq6726	FQ216728	NA	chr9	-	81501824	81515918_x000D_
CUST_8193_PI428311958	6.27591	P	7.48021	P	0.43398	2.30425	down	0	CUST_8193_PI428311958	0	lncRNA	NA	rn4_all_mrna_FQ234992 range=chr15:45688400-45689392 5'pad=0 3'pad=0 strand=- repeatMasking=none	seq8281	FQ234992	NA	chr15	-	45688400	45689392_x000D_
CUST_9482_PI428311958	6.476	P	7.68022	P	0.434003	2.30413	down	0	CUST_9482_PI428311958	0	lncRNA	NA	"gi|293359611|ref|XR_086266.1| PREDICTED: Rattus norvegicus similar to MmKIF17 (RGD1562511), miscRNA"	seq9583	XR_086266.1	NA	NA	NA	NA	NA_x000D_
CUST_4810_PI428311958	6.41095	P	7.61244	P	0.434825	2.29977	down	0	CUST_4810_PI428311958	0	lncRNA	NA	rn4_all_mrna_FQ213806 range=chr4:16521422-16522799 5'pad=0 3'pad=0 strand=- repeatMasking=none	seq4842	FQ213806	NA	chr4	-	16521422	16522799_x000D_
CUST_5644_PI428311958	5.18963	A	6.39002	P	0.435155	2.29803	down	0	CUST_5644_PI428311958	0	lncRNA	NA	rn4_all_mrna_FQ228778 range=chr6:50625725-50627039 5'pad=0 3'pad=0 strand=+ repeatMasking=none	seq5694	FQ228778	NA	chr6	+	50625725	50627039_x000D_
CUST_9327_PI428311958	7.35424	P	8.55387	P	0.435387	2.29681	down	0	CUST_9327_PI428311958	0	lncRNA	NA	"gi|293346373|ref|XR_085799.1| PREDICTED: Rattus norvegicus similar to serine/threonine kinase (RGD1565143), miscRNA"	seq9428	XR_085799.1	NA	NA	NA	NA	NA_x000D_
CUST_868_PI428311958	5.70425	P	6.90097	P	0.436265	2.29218	down	0	CUST_868_PI428311958	0	lncRNA	NA	"chr18|mm9_knownGene_uc008ekt.1| strand:- 27050093-27050119,27049583-27049788,27044051-27044212,27044005-27044050,27039227-27039345,27033455-27033530,"	seq871	uc008ekt.1	NA	chr18	-	27033455	27050119_x000D_
CUST_7368_PI428311958	4.61879	A	5.81249	P	0.437183	2.28737	down	0	CUST_7368_PI428311958	0	lncRNA	NA	rn4_all_mrna_FQ226844 range=chr11:3396186-3397698 5'pad=0 3'pad=0 strand=+ repeatMasking=none	seq7444	FQ226844	NA	chr11	+	3396186	3397698_x000D_
CUST_9035_PI428311958	4.86885	A	6.05879	P	0.438323	2.28142	down	0	CUST_9035_PI428311958	0	lncRNA	NA	rn4_all_mrna_FQ211995 range=chr20:25185659-25203866 5'pad=0 3'pad=0 strand=+ repeatMasking=none	seq9134	FQ211995	NA	chr20	+	25185659	25203866_x000D_
CUST_2659_PI428311958	9.41973	P	10.6095	P	0.438379	2.28113	down	0	CUST_2659_PI428311958	0	lncRNA	NA	"chr17|gi|377834195|ref|XR_142210.1|| strand:- 33352326-33352930,"	seq2668	XR_142210.1	NA	chr17	-	33352326	33352930_x000D_
CUST_2027_PI428311958	5.26416	P	6.45161	P	0.439079	2.2775	down	0	CUST_2027_PI428311958	0	lncRNA	NA	"chr3|mm9_knownGene_uc008lzo.1| strand:- 108591169-108591208,108590879-108591166,108365182-108365286,108359642-108359679,108359150-108359228,108350396-108350493,108348057-108348180,108337115-108337203,108332319-108332382,108331808-108331899,108330181-108330255,108328943-108329011,108328204-108328310,108323623-108323966,108323261-108323443,108323240-108323259,108323173-108323239,108323106-10832316…	seq2033	uc008lzo.1	NA	chr3	-	108323040	108591208_x000D_
CUST_5478_PI428311958	7.18012	P	8.36726	P	0.43917	2.27702	down	0	CUST_5478_PI428311958	0	lncRNA	NA	rn4_all_mrna_FQ221091 range=chr5:165132891-165137762 5'pad=0 3'pad=0 strand=- repeatMasking=none	seq5525	FQ221091	NA	chr5	-	165132891	165137762_x000D_
CUST_8979_PI428311958	5.8516	P	7.03516	P	0.440263	2.27137	down	0	CUST_8979_PI428311958	0	lncRNA	NA	rn4_all_mrna_D82069 range=chr20:3711229-3716325 5'pad=0 3'pad=0 strand=+ repeatMasking=none	seq9078	D82069	NA	chr20	+	3711229	3716325_x000D_
CUST_8492_PI428311958	8.09748	P	9.27576	P	0.441878	2.26307	down	0	CUST_8492_PI428311958	0	lncRNA	NA	rn4_all_mrna_X79860 range=chr17:16147262-16149052 5'pad=0 3'pad=0 strand=- repeatMasking=none	seq8583	X79860	NA	chr17	-	16147262	16149052_x000D_
CUST_6066_PI428311958	11.928	P	13.1033	P	0.442779	2.25846	down	0	CUST_6066_PI428311958	0	lncRNA	NA	rn4_all_mrna_BC168705 range=chr7:114696103-114705795 5'pad=0 3'pad=0 strand=- repeatMasking=none	seq6122	BC168705	NA	chr7	-	114696103	114705795_x000D_
CUST_9305_PI428311958	5.4785	P	6.65315	P	0.44299	2.25739	down	0	CUST_9305_PI428311958	0	lncRNA	NA	"gi|293345590|ref|XR_085770.1| PREDICTED: Rattus norvegicus similar to projection protein PF6 (LOC690746), miscRNA"	seq9406	XR_085770.1	NA	NA	NA	NA	NA_x000D_
CUST_8921_PI428311958	7.42209	P	8.5963	P	0.443126	2.25669	down	0	CUST_8921_PI428311958	0	lncRNA	NA	rn4_all_mrna_FQ232327 range=chr19:47515263-47515968 5'pad=0 3'pad=0 strand=+ repeatMasking=none	seq9018	FQ232327	NA	chr19	+	47515263	47515968_x000D_
CUST_1496_PI428311958	15.705	P	16.8791	P	0.443184	2.2564	down	0	CUST_1496_PI428311958	0	lncRNA	NA	"chr2|ri|1700019E20|ZX00037K18|882| strand:- 189411444-189411518,189411327-189411442,189410891-189411063,189410105-189410280,189409603-189409687,189408569-189408819,"	seq1501	ZX00037K18	NA	chr2	-	189408576	189411520_x000D_
CUST_3444_PI428311958	5.90811	P	7.07861	P	0.444269	2.25089	down	0	CUST_3444_PI428311958	0	lncRNA	NA	rn4_all_mrna_BC169017 range=chr1:93963386-93976701 5'pad=0 3'pad=0 strand=+ repeatMasking=none	seq3457	BC169017	NA	chr1	+	93963386	93976701_x000D_
CUST_2685_PI428311958	9.39083	P	10.5601	P	0.444633	2.24905	down	0	CUST_2685_PI428311958	0	lncRNA	NA	"chr5|gi|359339013|ref|NR_045549.2|| strand:- 58937468-58937773,58931787-58931931,58928510-58928622,58927615-58927631,58927556-58927611,58927127-58927303,58925583-58925650,58925020-58925179,"	seq2694	NR_045549.2	NA	chr5	-	58925020	58937772_x000D_
CUST_1169_PI428311958	6.78582	P	7.95392	P	0.445007	2.24716	down	0	CUST_1169_PI428311958	0	lncRNA	NA	"chr7|mm9_knownGene_uc011zus.1| strand:+ 114299065-114299290,114314142-114314625,114314626-114314743,114314744-114314766,114315158-114315354,114315500-114315621,114322334-114322667,114322668-114322741,"	seq1172	uc011zus.1	NA	chr7	+	114299064	114322744_x000D_
CUST_8626_PI428311958	7.22248	P	8.38947	P	0.445349	2.24543	down	0	CUST_8626_PI428311958	0	lncRNA	NA	rn4_all_mrna_FQ226873 range=chr17:82965375-82966581 5'pad=0 3'pad=0 strand=+ repeatMasking=none	seq8718	FQ226873	NA	chr17	+	82965375	82966581_x000D_
CUST_1835_PI428311958	6.93966	P	8.10295	P	0.446493	2.23968	down	0	CUST_1835_PI428311958	0	lncRNA	NA	"chr5|mm9_knownGene_uc008tfu.1| strand:+ 80266065-80266110,80270092-80270138,80274902-80274955,80276575-80276628,80276867-80276920,80281104-80281157,80284040-80284093,80284494-80284538,80284628-80284672,80284895-80284948,80285715-80285768,80286435-80286489,80289737-80289792,80296656-80296659,80296661-80296715,80296804-80296909,80297812-80297867,80297873-80297877,80298602-80298649,80300675-8030073…	seq1841	uc008tfu.1	NA	chr5	+	80266064	80318024_x000D_
CUST_9755_PI428311958	5.82905	P	6.9898	P	0.447281	2.23573	down	0	CUST_9755_PI428311958	0	lncRNA	NA	"gi|295852344|ref|XR_086183.2| PREDICTED: Rattus norvegicus similar to projection protein PF6 (LOC690746), miscRNA"	seq9856	XR_086183.2	NA	NA	NA	NA	NA_x000D_
CUST_7219_PI428311958	9.54477	P	10.7036	P	0.447884	2.23272	down	0	CUST_7219_PI428311958	0	lncRNA	NA	rn4_all_mrna_FQ231867 range=chr10:77471085-77474805 5'pad=0 3'pad=0 strand=+ repeatMasking=none	seq7292	FQ231867	NA	chr10	+	77471085	77474805_x000D_
CUST_5693_PI428311958	8.27751	P	9.43496	P	0.448303	2.23064	down	0	CUST_5693_PI428311958	0	lncRNA	NA	rn4_all_mrna_BC098054 range=chr6:85795683-85797866 5'pad=0 3'pad=0 strand=- repeatMasking=none	seq5743	BC098054	NA	chr6	-	85795683	85797866_x000D_
CUST_7330_PI428311958	6.46767	P	7.62433	P	0.448549	2.22941	down	0	CUST_7330_PI428311958	0	lncRNA	NA	rn4_all_mrna_U61743 range=chr10:108082568-108083591 5'pad=0 3'pad=0 strand=- repeatMasking=none	seq7406	U61743	NA	chr10	-	108082568	108083591_x000D_
CUST_7004_PI428311958	6.84428	P	8.00069	P	0.448628	2.22902	down	0	CUST_7004_PI428311958	0	lncRNA	NA	rn4_all_mrna_U48828 range=chr10:20594912-20600361 5'pad=0 3'pad=0 strand=+ repeatMasking=none	seq7077	U48828	NA	chr10	+	20594912	20600361_x000D_
CUST_5797_PI428311958	8.57558	P	9.72751	P	0.450023	2.22211	down	0	CUST_5797_PI428311958	0	lncRNA	NA	rn4_all_mrna_BC158675 range=chr6:134125972-134149525 5'pad=0 3'pad=0 strand=+ repeatMasking=none	seq5847	BC158675	NA	chr6	+	134125972	134149525_x000D_
CUST_2014_PI428311958	8.44757	P	9.59817	P	0.450438	2.22006	down	0	CUST_2014_PI428311958	0	lncRNA	NA	"chr8|mm9_knownGene_uc012gzv.1| strand:+ 111604549-111604665,111604974-111605024,111605174-111605295,111605620-111605626,"	seq2020	uc012gzv.1	NA	chr8	+	111604552	111605624_x000D_
CUST_4839_PI428311958	8.78053	P	9.93063	P	0.450594	2.21929	down	0	CUST_4839_PI428311958	0	lncRNA	NA	rn4_all_mrna_FQ233071 range=chr4:44125888-44126625 5'pad=0 3'pad=0 strand=- repeatMasking=none	seq4871	FQ233071	NA	chr4	-	44125888	44126625_x000D_
CUST_1192_PI428311958	4.44516	A	5.59173	P	0.451697	2.21387	down	0	CUST_1192_PI428311958	0	lncRNA	NA	"chrX|mm9_knownGene_uc009tan.2| strand:- 3503841-3504039,3477799-3478045,3477128-3477242,3462507-3462621,3459698-3459945,3454543-3454837,3454471-3454542,3454459-3454470,3454427-3454432,3454406-3454422,3454331-3454369,3454305-3454330,3454281-3454303,3454180-3454280,3454058-3454179,3453895-3454052,3453764-3453886,3453720-3453762,3453503-3453716,3453457-3453498,3453207-3453453,3453080-3453205,345302…	seq1195	uc009tan.2	NA	chrX	-	3452523	3504039_x000D_
CUST_6741_PI428311958	6.2833	P	7.42964	P	0.451771	2.21351	down	0	CUST_6741_PI428311958	0	lncRNA	NA	rn4_all_mrna_FQ228246 range=chrX:10253511-10424665 5'pad=0 3'pad=0 strand=+ repeatMasking=none	seq6808	FQ228246	NA	chrX	+	10253511	10424665_x000D_
CUST_8493_PI428311958	6.96389	P	8.10757	P	0.452603	2.20944	down	0	CUST_8493_PI428311958	0	lncRNA	NA	rn4_all_mrna_FQ212264 range=chr17:16310818-16311020 5'pad=0 3'pad=0 strand=- repeatMasking=none	seq8584	FQ212264	NA	chr17	-	16310818	16311020_x000D_
CUST_7128_PI428311958	8.0468	P	9.18735	P	0.453587	2.20465	down	0	CUST_7128_PI428311958	0	lncRNA	NA	rn4_all_mrna_FQ226184 range=chr10:59500874-59501709 5'pad=0 3'pad=0 strand=+ repeatMasking=none	seq7201	FQ226184	NA	chr10	+	59500874	59501709_x000D_
CUST_7224_PI428311958	5.35774	P	6.49644	P	0.45417	2.20182	down	0	CUST_7224_PI428311958	0	lncRNA	NA	rn4_all_mrna_BC079110 range=chr10:78450397-78451819 5'pad=0 3'pad=0 strand=+ repeatMasking=none	seq7297	BC079110	NA	chr10	+	78450397	78451819_x000D_
CUST_2597_PI428311958	8.77489	P	9.91333	P	0.454253	2.20142	down	0	CUST_2597_PI428311958	0	lncRNA	NA	"chr7|ri|2900008M13|ZX00068A02|557| strand:+ 116390012-116390252,116390269-116390457,116390475-116390553,"	seq2606	ZX00068A02	NA	chr7	+	116390016	116390552_x000D_
CUST_1711_PI428311958	10.054	P	11.1907	P	0.454793	2.1988	down	0	CUST_1711_PI428311958	0	lncRNA	NA	"chr10|mm9_knownGene_uc007jsx.1| strand:+ 56784991-56785011,56785012-56785018,56785025-56785204,56785501-56785587,56785680-56785886,56785890-56786055,"	seq1717	uc007jsx.1	NA	chr10	+	56784992	56786056_x000D_
CUST_1618_PI428311958	6.12921	P	7.26484	P	0.455136	2.19715	down	0	CUST_1618_PI428311958	0	lncRNA	NA	"chr7|mm9_knownGene_uc007win.1| strand:- 114123031-114123286,114122462-114122584,114122292-114122393,114121900-114122196,114121701-114121793,114121551-114121575,114121398-114121481,114121260-114121315,114121087-114121170,"	seq1624	uc007win.1	NA	chr7	-	114121088	114123288_x000D_
CUST_696_PI428311958	7.96101	P	9.09564	P	0.455453	2.19562	down	0	CUST_696_PI428311958	0	lncRNA	NA	"chr2|gi|377835009|ref|XR_140607.1|| strand:- 174852108-174853426,174852102-174852106,174852097-174852100,174852044-174852096,174852019-174852042,174851604-174852014,174851585-174851592,174851451-174851582,174851444-174851448,174851332-174851441,174851298-174851325,174851288-174851297,174851223-174851276,174851210-174851213,174851140-174851209,174851117-174851138,174851112-174851115,174851106-174…	seq699	XR_140607.1	NA	chr2	-	174849628	174853426_x000D_
CUST_9614_PI428311958	5.13124	P	6.26416	P	0.455991	2.19303	down	0	CUST_9614_PI428311958	0	lncRNA	NA	"gi|295851821|ref|XR_085777.2| PREDICTED: Rattus norvegicus Kruppel-like factor 5-like (LOC100365786), miscRNA"	seq9715	XR_085777.2	NA	NA	NA	NA	NA_x000D_
CUST_2687_PI428311958	8.48265	P	9.61505	P	0.456157	2.19223	down	0	CUST_2687_PI428311958	0	lncRNA	NA	"chr6|mm9_knownGene_uc008dqd.1| strand:+ 2553309-2553326,2553332-2553353,2553358-2553365,2553371-2553413,2553414-2553473,2553474-2553592,2553596-2553609,2553623-2553685,2553688-2553811,2553812-2553897,2553912-2554040,2554050-2554068,2554069-2554238,2554239-2554286,2554297-2554332,2554334-2554340,2554353-2554532,2554536-2554778,2554779-2554831,2554833-2554914,2554936-2554944,2554959-2555137,"	seq2696	uc008dqd.1	NA	chr6	+	2553309	2555137_x000D_
CUST_3975_PI428311958	5.23931	A	6.37167	P	0.456169	2.19217	down	0	CUST_3975_PI428311958	0	lncRNA	NA	rn4_all_mrna_BC086541 range=chr2:58080755-58083437 5'pad=0 3'pad=0 strand=+ repeatMasking=none	seq3997	BC086541	NA	chr2	+	58080755	58083437_x000D_
CUST_8880_PI428311958	7.02215	P	8.15447	P	0.456182	2.19211	down	0	CUST_8880_PI428311958	0	lncRNA	NA	rn4_all_mrna_AY724537 range=chr19:35440542-35446555 5'pad=0 3'pad=0 strand=+ repeatMasking=none	seq8976	AY724537	NA	chr19	+	35440542	35446555_x000D_
CUST_2480_PI428311958	6.66175	P	7.79263	P	0.456639	2.18991	down	0	CUST_2480_PI428311958	0	lncRNA	NA	"chr2|ri|6430555I10|PX00717F07|1644| strand:+ 144685777-144685786,144685792-144685819,144685821-144685981,144686004-144686074,144686076-144686087,144686089-144686212,144686222-144686229,144686235-144686374,144686375-144686386,144686395-144686410,144686412-144686480,144686482-144686682,144686683-144686686,144686687-144686961,144686970-144687079,144687091-144687185,144687188-144687205,144687207-144…	seq2488	PX00717F07	NA	chr2	+	144685776	144687344_x000D_
CUST_3572_PI428311958	7.31895	P	8.44757	P	0.457353	2.18649	down	0	CUST_3572_PI428311958	0	lncRNA	NA	rn4_all_mrna_X05701 range=chr1:168815070-168815900 5'pad=0 3'pad=0 strand=- repeatMasking=none	seq3587	X05701	NA	chr1	-	168815070	168815900_x000D_
CUST_6403_PI428311958	4.71736	A	5.84461	P	0.457785	2.18443	down	0	CUST_6403_PI428311958	0	lncRNA	NA	rn4_all_mrna_FQ225473 range=chr8:101032915-101041642 5'pad=0 3'pad=0 strand=+ repeatMasking=none	seq6466	FQ225473	NA	chr8	+	101032915	101041642_x000D_
CUST_44_PI428311958	7.58586	P	8.7126	P	0.457952	2.18364	down	0	CUST_44_PI428311958	0	lncRNA	NA	"chr12|gi|339895807|ref|NR_040425.1|| strand:+ 11768423-11768438,11768439-11768515,11768625-11768743,11769076-11769233,11769253-11769262,11769264-11769292,11769294-11769368,11769377-11769387,"	seq44	NR_040425.1	NA	chr12	+	11768423	11769387_x000D_
CUST_5808_PI428311958	6.07358	P	7.19907	P	0.458349	2.18174	down	0	CUST_5808_PI428311958	0	lncRNA	NA	rn4_all_mrna_FQ226366 range=chr6:135954505-135955088 5'pad=0 3'pad=0 strand=+ repeatMasking=none	seq5858	FQ226366	NA	chr6	+	135954505	135955088_x000D_
CUST_1864_PI428311958	7.66444	P	8.7897	P	0.458419	2.18141	down	0	CUST_1864_PI428311958	0	lncRNA	NA	"chr8|mm9_knownGene_uc012gpj.1| strand:- 20894923-20894975,20892537-20892654,20891094-20892175,20890959-20891093,20878830-20878840,20878772-20878829,20878733-20878767,20878542-20878611,20877971-20878095,20877966-20877969,20877904-20877964,20873270-20873491,20869204-20869216,20868990-20869194,20868644-20868648,20868528-20868610,20867727-20867790,20867717-20867725,20867691-20867716,20867667-2086768…	seq1870	uc012gpj.1	NA	chr8	-	20865620	20894976_x000D_
CUST_7637_PI428311958	9.78001	P	10.9032	P	0.459062	2.17835	down	0	CUST_7637_PI428311958	0	lncRNA	NA	rn4_all_mrna_FQ216879 range=chr13:13159560-13530639 5'pad=0 3'pad=0 strand=- repeatMasking=none	seq7715	FQ216879	NA	chr13	-	13159560	13530639_x000D_
CUST_1619_PI428311958	10.2184	P	11.3395	P	0.45972	2.17524	down	0	CUST_1619_PI428311958	0	lncRNA	NA	"chr4|gi|377834876|ref|XR_140517.1|| strand:+ 5357779-5357862,5357863-5357867,5357869-5357918,5357920-5358000,5358001-5358015,5358017-5358032,5358034-5358290,5358291-5358344,5358843-5358845,5359408-5359461,5359462-5359498,5359504-5359610,"	seq1625	XR_140517.1	NA	chr4	+	5357779	5359610_x000D_
CUST_6295_PI428311958	5.05708	A	6.17726	P	0.460036	2.17374	down	0	CUST_6295_PI428311958	0	lncRNA	NA	rn4_all_mrna_FQ233925 range=chr8:59913690-59914656 5'pad=0 3'pad=0 strand=- repeatMasking=none	seq6358	FQ233925	NA	chr8	-	59913690	59914656_x000D_
CUST_1385_PI428311958	7.37181	P	8.49129	P	0.46026	2.17268	down	0	CUST_1385_PI428311958	0	lncRNA	NA	"chr12|gi|339895806|ref|NR_040424.1|| strand:+ 11768423-11768438,11768439-11768743,11769076-11769233,11769253-11769262,11769264-11769292,11769294-11769368,11769377-11769387,"	seq1389	NR_040424.1	NA	chr12	+	11768423	11769387_x000D_
CUST_1248_PI428311958	6.61806	P	7.73217	P	0.461976	2.16461	down	0	CUST_1248_PI428311958	0	lncRNA	NA	"chr2|gi|374093193|ref|NR_046182.1|| strand:+ 23379211-23379226,23379230-23379357,23379372-23379429,23379433-23379483,23379490-23379525,23380354-23380495,23380625-23380629,23380981-23380984,23380986-23381048,23381108-23381153,23381181-23381271,23381305-23381393,23381394-23381439,23381467-23381487,23381488-23381494,23381498-23381909,23381934-23382061,23382074-23382078,23382080-23382618,23382619-23…	seq1252	NR_046182.1	NA	chr2	+	23379212	23383444_x000D_
CUST_329_PI428311958	6.21801	P	7.33069	P	0.462434	2.16247	down	0	CUST_329_PI428311958	0	lncRNA	NA	"chr2|mm9_knownGene_uc008peq.1| strand:+ 141974793-141974876,141974877-141974931,141974932-141974985,141974999-141975026,142142996-142143088,142182024-142182175,142182176-142182181,142182189-142182309,142182310-142182339,142182340-142182357,142182358-142182409,142182414-142182600,142182644-142182684,142182685-142182776,142182777-142182779,142182782-142182878,142182880-142182898,142182900-14218293…	seq331	uc008peq.1	NA	chr2	+	141974793	142183204_x000D_
CUST_6172_PI428311958	5.96706	P	7.07831	P	0.462891	2.16033	down	0	CUST_6172_PI428311958	0	lncRNA	NA	rn4_all_mrna_FQ223043 range=chr8:42449339-42469414 5'pad=0 3'pad=0 strand=- repeatMasking=none	seq6233	FQ223043	NA	chr8	-	42449339	42469414_x000D_
CUST_336_PI428311958	12.1408	P	13.2473	P	0.464398	2.15332	down	0	CUST_336_PI428311958	0	lncRNA	NA	"chr3|gi|343962617|ref|NR_028487.2|| strand:- 9855172-9855283,9852791-9852876,9852706-9852710,9852596-9852688,9849605-9849717,9848132-9848296,9847886-9848015,9847454-9847533,9847411-9847453,9847300-9847409,"	seq338	NR_028487.2	NA	chr3	-	9847300	9855283_x000D_
CUST_9108_PI428311958	6.44976	P	7.5561	P	0.464469	2.15299	down	0	CUST_9108_PI428311958	0	lncRNA	NA	rn4_all_mrna_FQ225599 range=chrUn:25328604-25329673 5'pad=0 3'pad=0 strand=+ repeatMasking=none	seq9208	FQ225599	NA	chrUn	+	25328604	25329673_x000D_
CUST_8599_PI428311958	6.8264	P	7.92906	P	0.465659	2.14749	down	0	CUST_8599_PI428311958	0	lncRNA	NA	rn4_all_mrna_U48828 range=chr17:69651115-69656599 5'pad=0 3'pad=0 strand=- repeatMasking=none	seq8691	U48828	NA	chr17	-	69651115	69656599_x000D_
CUST_3424_PI428311958	9.29056	P	10.393	P	0.46573	2.14717	down	0	CUST_3424_PI428311958	0	lncRNA	NA	rn4_all_mrna_FQ231093 range=chr1:85931935-85933354 5'pad=0 3'pad=0 strand=- repeatMasking=none	seq3436	FQ231093	NA	chr1	-	85931935	85933354_x000D_
CUST_9406_PI428311958	10.0763	P	11.1785	P	0.465805	2.14682	down	0	CUST_9406_PI428311958	0	lncRNA	NA	"gi|293350323|ref|XR_085935.1| PREDICTED: Rattus norvegicus liver carboxylesterase 1-like (LOC684920), miscRNA"	seq9507	XR_085935.1	NA	NA	NA	NA	NA_x000D_
CUST_9121_PI428311958	6.29338	P	7.39507	P	0.46597	2.14606	down	0	CUST_9121_PI428311958	0	lncRNA	NA	rn4_all_mrna_BC158634 range=chrUn:42639195-42670593 5'pad=0 3'pad=0 strand=- repeatMasking=none	seq9221	BC158634	NA	chrUn	-	42639195	42670593_x000D_
CUST_1865_PI428311958	6.28905	P	7.39	P	0.466209	2.14496	down	0	CUST_1865_PI428311958	0	lncRNA	NA	"chr15|mm9_knownGene_uc011zqq.1| strand:+ 108785429-108785523,108785527-108785698,108786545-108786762,108905108-108905254,108912068-108912191,108915729-108915734,108915736-108915789,108915794-108915856,108915858-108915867,108918559-108918699,108935982-108936128,109031257-109031344,109043845-109043993,109049011-109049124,109050225-109050434,109050443-109050632,109050638-109050915,109050921-1090510…	seq1871	uc011zqq.1	NA	chr15	+	108785432	109051032_x000D_
CUST_701_PI428311958	10.1561	P	11.2555	P	0.466722	2.1426	down	0	CUST_701_PI428311958	0	lncRNA	NA	"chr6|mm9_knownGene_uc008dot.1| strand:- 961773-961787,961354-961760,961090-961107,961077-961082,961024-961076,"	seq704	uc008dot.1	NA	chr6	-	961024	961787_x000D_
CUST_6748_PI428311958	7.14712	P	8.24567	P	0.466987	2.14139	down	0	CUST_6748_PI428311958	0	lncRNA	NA	rn4_all_mrna_FQ221091 range=chrX:79002444-79254807 5'pad=0 3'pad=0 strand=- repeatMasking=none	seq6816	FQ221091	NA	chrX	-	79002444	79254807_x000D_
CUST_8501_PI428311958	5.45857	A	6.5571	P	0.466995	2.14135	down	0	CUST_8501_PI428311958	0	lncRNA	NA	rn4_all_mrna_FQ235037 range=chr17:21007214-21008389 5'pad=0 3'pad=0 strand=+ repeatMasking=none	seq8592	FQ235037	NA	chr17	+	21007214	21008389_x000D_
CUST_1671_PI428311958	4.50388	A	5.6007	P	0.467545	2.13883	down	0	CUST_1671_PI428311958	0	lncRNA	NA	"chr20|mm9_knownGene_uc008buc.1| strand:+ 9123656-9123909,9123968-9123970,9124471-9124657,9125445-9125454,9125459-9125485,9128039-9128162,9130595-9130713,9133933-9134135,"	seq1677	uc008buc.1	NA	chr20	+	9123656	9134135_x000D_
CUST_1861_PI428311958	12.1647	P	13.2592	P	0.468295	2.13541	down	0	CUST_1861_PI428311958	0	lncRNA	NA	"chr3|gi|343962616|ref|NR_028486.2|| strand:- 9855172-9855283,9852791-9852876,9852706-9852710,9852596-9852688,9849605-9849717,9848132-9848296,9847841-9848015,9847454-9847531,9847411-9847453,9847300-9847409,"	seq1867	NR_028486.2	NA	chr3	-	9847300	9855283_x000D_
CUST_5138_PI428311958	7.24046	P	8.33485	P	0.468335	2.13522	down	0	CUST_5138_PI428311958	0	lncRNA	NA	rn4_all_mrna_FQ221091 range=chr4:183146077-183151207 5'pad=0 3'pad=0 strand=+ repeatMasking=none	seq5175	FQ221091	NA	chr4	+	183146077	183151207_x000D_
CUST_7675_PI428311958	4.65565	A	5.74932	P	0.468569	2.13416	down	0	CUST_7675_PI428311958	0	lncRNA	NA	rn4_all_mrna_BC128751 range=chr13:44217425-44222552 5'pad=0 3'pad=0 strand=- repeatMasking=none	seq7753	BC128751	NA	chr13	-	44217425	44222552_x000D_
CUST_1745_PI428311958	4.95391	A	6.04624	P	0.469004	2.13218	down	0	CUST_1745_PI428311958	0	lncRNA	NA	"chr1|ri|2900035H07|ZX00068O14|667| strand:- 30573843-30573920,30573814-30573842,30573785-30573788,30573734-30573784,30573462-30573726,30573412-30573461,30573334-30573411,30573318-30573324,30573272-30573316,"	seq1751	ZX00068O14	NA	chr1	-	30573272	30573920_x000D_
CUST_1041_PI428311958	6.11148	P	7.20286	P	0.469312	2.13078	down	0	CUST_1041_PI428311958	0	lncRNA	NA	"chrX|gi|377836457|ref|XR_141400.1|| strand:+ 139192115-139192235,139192245-139192258,139192260-139192374,139192381-139192399,139192401-139192429,139192432-139192437,139192439-139192466,139192468-139192651,"	seq1044	XR_141400.1	NA	chrX	+	139192112	139192656_x000D_
CUST_8755_PI428311958	6.92271	P	8.01251	P	0.469826	2.12845	down	0	CUST_8755_PI428311958	0	lncRNA	NA	rn4_all_mrna_S77494 range=chr18:47893877-47896062 5'pad=0 3'pad=0 strand=- repeatMasking=none	seq8850	S77494	NA	chr18	-	47893877	47896062_x000D_
CUST_2316_PI428311958	7.14782	P	8.23749	P	0.46987	2.12825	down	0	CUST_2316_PI428311958	0	lncRNA	NA	"chr4|mm9_knownGene_uc012est.1| strand:+ 161264967-161265523,161265531-161265760,161269387-161269447,161269539-161269630,161270163-161270166,161270785-161270925,161271852-161271889,161271890-161271896,161271897-161271918,161271920-161272160,161272289-161272409,161272652-161272747,161279320-161279450,161280884-161281042,161281050-161281133,161281134-161281162,161281163-161281227,161281228-16128124…	seq2322	uc012est.1	NA	chr4	+	161264960	161282160_x000D_
CUST_2432_PI428311958	4.60077	A	5.68926	P	0.470253	2.12651	down	0	CUST_2432_PI428311958	0	lncRNA	NA	"chr8|mm9_knownGene_uc009ova.2| strand:+ 38773178-38773264,38773269-38773380,38776783-38776973,38779553-38779726,38780105-38780260,38782721-38782846,38783124-38783250,38783496-38783869,38783871-38784061,38784064-38784085,38784086-38784171,38784175-38784249,38784250-38784272,38784274-38784348,"	seq2440	uc009ova.2	NA	chr8	+	38773176	38784348_x000D_
CUST_3851_PI428311958	10.7574	P	11.8444	P	0.470743	2.1243	down	0	CUST_3851_PI428311958	0	lncRNA	NA	rn4_all_mrna_FQ225015 range=chr2:122284599-122305447 5'pad=0 3'pad=0 strand=+ repeatMasking=none	seq3871	FQ225015	NA	chr2	+	122284599	122305447_x000D_
CUST_3250_PI428311958	5.44644	P	6.53159	P	0.471341	2.1216	down	0	CUST_3250_PI428311958	0	lncRNA	NA	rn4_all_mrna_AM040976 range=chr1:202082860-202124440 5'pad=0 3'pad=0 strand=+ repeatMasking=none	seq3262	AM040976	NA	chr1	+	202082860	202124440_x000D_
CUST_5570_PI428311958	4.79772	A	5.88245	P	0.471482	2.12097	down	0	CUST_5570_PI428311958	0	lncRNA	NA	rn4_all_mrna_U04935 range=chr6:4691519-4710472 5'pad=0 3'pad=0 strand=- repeatMasking=none	seq5620	U04935	NA	chr6	-	4691519	4710472_x000D_
CUST_579_PI428311958	5.17443	A	6.25819	P	0.471796	2.11956	down	0	CUST_579_PI428311958	0	lncRNA	NA	"chr1|gi|377833483|ref|XR_141810.1|| strand:- 42341588-42341646,42341369-42341586,42341364-42341368,42341359-42341362,42341355-42341358,42341322-42341353,42341259-42341321,42341255-42341258,42341226-42341254,42341154-42341224,42340940-42341131,42340908-42340938,42340855-42340886,"	seq581	XR_141810.1	NA	chr1	-	42340855	42341646_x000D_
CUST_3256_PI428311958	10.9798	P	12.0636	P	0.471805	2.11952	down	0	CUST_3256_PI428311958	0	lncRNA	NA	rn4_all_mrna_FQ221059 range=chr1:213052472-213542995 5'pad=0 3'pad=0 strand=+ repeatMasking=none	seq3268	FQ221059	NA	chr1	+	213052472	213542995_x000D_
CUST_298_PI428311958	11.0281	P	12.1117	P	0.471824	2.11943	down	0	CUST_298_PI428311958	0	lncRNA	NA	"chr5|ri|1700084F12|ZX00076O18|586| strand:+ 148647768-148648089,148648195-148648458,"	seq299	ZX00076O18	NA	chr5	+	148647776	148648464_x000D_
CUST_9113_PI428311958	4.26145	A	5.34508	P	0.471841	2.11936	down	0	CUST_9113_PI428311958	0	lncRNA	NA	rn4_all_mrna_BC160924 range=chrUn:25767687-25777387 5'pad=0 3'pad=0 strand=- repeatMasking=none	seq9213	BC160924	NA	chrUn	-	25767687	25777387_x000D_
CUST_7079_PI428311958	6.15559	P	7.23885	P	0.471963	2.11881	down	0	CUST_7079_PI428311958	0	lncRNA	NA	rn4_all_mrna_BC088302 range=chr10:46461692-46462264 5'pad=0 3'pad=0 strand=+ repeatMasking=none	seq7152	BC088302	NA	chr10	+	46461692	46462264_x000D_
CUST_3829_PI428311958	5.90827	P	6.98748	P	0.473287	2.11288	down	0	CUST_3829_PI428311958	0	lncRNA	NA	rn4_all_mrna_BC070882 range=chr2:1551837-1608376 5'pad=0 3'pad=0 strand=- repeatMasking=none	seq3849	BC070882	NA	chr2	-	1551837	1608376_x000D_
CUST_7788_PI428311958	6.02341	P	7.10125	P	0.473739	2.11087	down	0	CUST_7788_PI428311958	0	lncRNA	NA	rn4_all_mrna_FQ213272 range=chr13:87248542-87249640 5'pad=0 3'pad=0 strand=+ repeatMasking=none	seq7866	FQ213272	NA	chr13	+	87248542	87249640_x000D_
CUST_283_PI428311958	7.47334	P	8.55112	P	0.473756	2.11079	down	0	CUST_283_PI428311958	0	lncRNA	NA	"chr20|mm9_knownGene_uc007fuy.2| strand:+ 12228286-12228353,12250830-12250984,12252160-12252183,12253007-12253039,12253774-12253890,12263404-12263535,12264743-12264871,12268018-12268161,12271179-12271220,12285211-12285263,12288745-12288914,12289607-12289821,12289822-12290095,12290097-12290177,12290180-12290183,12290184-12290270,12290272-12290275,"	seq284	uc007fuy.2	NA	chr20	+	12228286	12290275_x000D_
CUST_2444_PI428311958	6.37941	P	7.45502	P	0.474473	2.1076	down	0	CUST_2444_PI428311958	0	lncRNA	NA	"chr15|gi|237858772|ref|NR_027699.1|| strand:- 57556500-57556555,57556432-57556499,57556101-57556215,57549497-57549572,57538922-57538958,57538850-57538920,57532509-57532619,57532340-57532508,57532322-57532328,57532273-57532316,57532187-57532269,"	seq2452	NR_027699.1	NA	chr15	-	57532188	57556556_x000D_
CUST_9143_PI428311958	6.21081	P	7.28567	P	0.474718	2.10651	down	0	CUST_9143_PI428311958	0	lncRNA	NA	rn4_all_mrna_FQ215630 range=chr2_random:3216423-3219488 5'pad=0 3'pad=0 strand=- repeatMasking=none	seq9244	FQ215630	NA	chr2_random	-	3216423	3219488_x000D_
CUST_4821_PI428311958	6.30008	P	7.37452	P	0.474858	2.10589	down	0	CUST_4821_PI428311958	0	lncRNA	NA	rn4_all_mrna_FQ212844 range=chr4:25941572-25942998 5'pad=0 3'pad=0 strand=+ repeatMasking=none	seq4853	FQ212844	NA	chr4	+	25941572	25942998_x000D_
CUST_4227_PI428311958	5.46535	P	6.53964	P	0.474905	2.10568	down	0	CUST_4227_PI428311958	0	lncRNA	NA	rn4_all_mrna_FQ231611 range=chr2:203305040-203307947 5'pad=0 3'pad=0 strand=- repeatMasking=none	seq4251	FQ231611	NA	chr2	-	203305040	203307947_x000D_
CUST_4460_PI428311958	5.61677	P	6.69072	P	0.475015	2.1052	down	0	CUST_4460_PI428311958	0	lncRNA	NA	rn4_all_mrna_FQ231604 range=chr3:42521996-42522738 5'pad=0 3'pad=0 strand=- repeatMasking=none	seq4487	FQ231604	NA	chr3	-	42521996	42522738_x000D_
CUST_1909_PI428311958	4.62826	A	5.70062	P	0.475537	2.10288	down	0	CUST_1909_PI428311958	0	lncRNA	NA	"chr20|mm9_knownGene_uc011xdx.1| strand:- 32766470-32766668,32765380-32766234,32723175-32723271,32718320-32718435,32704423-32704503,32612798-32612921,32611617-32611710,32603040-32603155,32597382-32597581,32596458-32596630,32584337-32584452,32583814-32584006,32583733-32583813,32583630-32583696,32583456-32583627,32583447-32583455,32583258-32583445,32583218-32583256,32583197-32583200,32582969-325831…	seq1915	uc011xdx.1	NA	chr20	-	32582516	32766668_x000D_
CUST_8922_PI428311958	6.42485	P	7.49572	P	0.476034	2.10069	down	0	CUST_8922_PI428311958	0	lncRNA	NA	rn4_all_mrna_FQ219113 range=chr19:47526733-47527543 5'pad=0 3'pad=0 strand=+ repeatMasking=none	seq9019	FQ219113	NA	chr19	+	47526733	47527543_x000D_
CUST_8380_PI428311958	4.87298	A	5.93794	P	0.477986	2.09211	down	0	CUST_8380_PI428311958	0	lncRNA	NA	rn4_all_mrna_FQ221471 range=chr16:61776082-61776896 5'pad=0 3'pad=0 strand=+ repeatMasking=none	seq8471	FQ221471	NA	chr16	+	61776082	61776896_x000D_
CUST_5092_PI428311958	5.77279	P	6.83741	P	0.478098	2.09162	down	0	CUST_5092_PI428311958	0	lncRNA	NA	rn4_all_mrna_FQ212835 range=chr4:160890164-160893606 5'pad=0 3'pad=0 strand=- repeatMasking=none	seq5129	FQ212835	NA	chr4	-	160890164	160893606_x000D_
CUST_668_PI428311958	6.84562	P	7.91004	P	0.478165	2.09133	down	0	CUST_668_PI428311958	0	lncRNA	NA	"chr14|mm9_knownGene_uc007hvj.1| strand:- 85482072-85482197,85477703-85477786,85459244-85459312,"	seq671	uc007hvj.1	NA	chr14	-	85459244	85482197_x000D_
CUST_5738_PI428311958	11.0472	P	12.1105	P	0.47854	2.08969	down	0	CUST_5738_PI428311958	0	lncRNA	NA	rn4_all_mrna_FQ231946 range=chr6:103119307-103119740 5'pad=0 3'pad=0 strand=- repeatMasking=none	seq5788	FQ231946	NA	chr6	-	103119307	103119740_x000D_
CUST_6565_PI428311958	8.69401	P	9.75431	P	0.479533	2.08536	down	0	CUST_6565_PI428311958	0	lncRNA	NA	rn4_all_mrna_AY383672 range=chr9:33179853-33191896 5'pad=0 3'pad=0 strand=+ repeatMasking=none	seq6630	AY383672	NA	chr9	+	33179853	33191896_x000D_
CUST_8080_PI428311958	7.20409	P	8.26224	P	0.480249	2.08225	down	0	CUST_8080_PI428311958	0	lncRNA	NA	rn4_all_mrna_FQ221091 range=chr15:5609361-5614545 5'pad=0 3'pad=0 strand=- repeatMasking=none	seq8165	FQ221091	NA	chr15	-	5609361	5614545_x000D_
CUST_1045_PI428311958	14.6786	P	15.7358	P	0.480575	2.08084	down	0	CUST_1045_PI428311958	0	lncRNA	NA	"chr10|gi|377836114|ref|XR_141210.1|| strand:- 13089440-13089459,13089335-13089429,13087914-13088016,13084869-13084986,13084835-13084866,13084815-13084833,"	seq1048	XR_141210.1	NA	chr10	-	13084815	13089459_x000D_
CUST_5455_PI428311958	5.05596	A	6.11221	P	0.480882	2.07951	down	0	CUST_5455_PI428311958	0	lncRNA	NA	rn4_all_mrna_FQ234330 range=chr5:156131489-156133444 5'pad=0 3'pad=0 strand=- repeatMasking=none	seq5501	FQ234330	NA	chr5	-	156131489	156133444_x000D_
CUST_9169_PI428311958	11.8476	P	12.9035	P	0.481002	2.07899	down	0	CUST_9169_PI428311958	0	lncRNA	NA	rn4_all_mrna_AY212271 range=chrX_random:775050-781671 5'pad=0 3'pad=0 strand=+ repeatMasking=none	seq9270	AY212271	NA	chrX_random	+	775050	781671_x000D_
CUST_9498_PI428311958	8.87142	P	9.92726	P	0.481015	2.07894	down	0	CUST_9498_PI428311958	0	lncRNA	NA	"gi|109484075|ref|XR_005439.1| PREDICTED: Rattus norvegicus Ab2-143 (LOC498829), miscRNA"	seq9599	XR_005439.1	NA	NA	NA	NA	NA_x000D_
CUST_6279_PI428311958	7.07061	P	8.12523	P	0.481424	2.07717	down	0	CUST_6279_PI428311958	0	lncRNA	NA	rn4_all_mrna_FQ233916 range=chr8:54333264-54334079 5'pad=0 3'pad=0 strand=- repeatMasking=none	seq6342	FQ233916	NA	chr8	-	54333264	54334079_x000D_
CUST_1007_PI428311958	7.50039	P	8.55495	P	0.481441	2.0771	down	0	CUST_1007_PI428311958	0	lncRNA	NA	"chr8|mm9_knownGene_uc009pkz.1| strand:- 54337633-54337686,54337353-54337631,54328944-54329063,54326934-54326994,54273780-54273941,54263997-54264121,54263479-54263602,54262119-54262339,54260226-54260378,54253803-54253967,54246841-54247070,54246274-54246278,54246129-54246272,54245997-54246128,54245705-54245868,54244840-54244950,54244151-54244236,54244102-54244104,54243123-54243432,54243112-5424311…	seq1010	uc009pkz.1	NA	chr8	-	54240308	54337688_x000D_
CUST_8950_PI428311958	6.41534	P	7.46931	P	0.48164	2.07624	down	0	CUST_8950_PI428311958	0	lncRNA	NA	rn4_all_mrna_AY845221 range=chr19:59209405-59209909 5'pad=0 3'pad=0 strand=- repeatMasking=none	seq9048	AY845221	NA	chr19	-	59209405	59209909_x000D_
CUST_520_PI428311958	11.3593	P	12.412	P	0.482043	2.0745	down	0	CUST_520_PI428311958	0	lncRNA	NA	"chr20|gi|309261980|ref|XR_105904.1|| strand:- 4972332-4972382,4972261-4972329,4972242-4972248,4971861-4972235,4971754-4971860,4970750-4971035,4970460-4970563,"	seq522	XR_105904.1	NA	chr20	-	4970460	4972382_x000D_
CUST_8613_PI428311958	7.35026	P	8.40219	P	0.482323	2.0733	down	0	CUST_8613_PI428311958	0	lncRNA	NA	rn4_all_mrna_AB020614 range=chr17:78487119-78509257 5'pad=0 3'pad=0 strand=- repeatMasking=none	seq8705	AB020614	NA	chr17	-	78487119	78509257_x000D_
CUST_5595_PI428311958	4.63099	A	5.68237	P	0.482504	2.07252	down	0	CUST_5595_PI428311958	0	lncRNA	NA	rn4_all_mrna_FQ233725 range=chr6:24633238-24634571 5'pad=0 3'pad=0 strand=- repeatMasking=none	seq5645	FQ233725	NA	chr6	-	24633238	24634571_x000D_
CUST_8238_PI428311958	10.1087	P	11.1596	P	0.48265	2.0719	down	0	CUST_8238_PI428311958	0	lncRNA	NA	rn4_all_mrna_FQ215889 range=chr15:85928297-85928569 5'pad=0 3'pad=0 strand=+ repeatMasking=none	seq8327	FQ215889	NA	chr15	+	85928297	85928569_x000D_
CUST_6245_PI428311958	5.44141	P	6.4899	P	0.483474	2.06836	down	0	CUST_6245_PI428311958	0	lncRNA	NA	rn4_all_mrna_FQ226376 range=chr8:46050754-46051739 5'pad=0 3'pad=0 strand=- repeatMasking=none	seq6308	FQ226376	NA	chr8	-	46050754	46051739_x000D_
CUST_5497_PI428311958	5.1031	A	6.15017	P	0.48395	2.06633	down	0	CUST_5497_PI428311958	0	lncRNA	NA	rn4_all_mrna_BC129124 range=chr5:171673032-171695956 5'pad=0 3'pad=0 strand=+ repeatMasking=none	seq5544	BC129124	NA	chr5	+	171673032	171695956_x000D_
CUST_1932_PI428311958	6.48106	P	7.5275	P	0.48416	2.06543	down	0	CUST_1932_PI428311958	0	lncRNA	NA	"chr1|mm9_knownGene_uc009jeh.2| strand:- 167464483-167464602,167463430-167463552,167459423-167459539,167456721-167456843,167456185-167456285,167455855-167455938,167454004-167454108,167449893-167450048,167449338-167449544,167434876-167435042,167433435-167433598,167432757-167432920,167430916-167431113,167428803-167428955,167424866-167424943,167423398-167423625,167423383-167423396,167423155-16742337…	seq1938	uc009jeh.2	NA	chr1	-	167422960	167464608_x000D_
CUST_9615_PI428311958	6.38664	P	7.43266	P	0.4843	2.06483	down	0	CUST_9615_PI428311958	0	lncRNA	NA	"gi|295851822|ref|XR_085778.2| PREDICTED: Rattus norvegicus phosducin-like (LOC100365843), miscRNA"	seq9716	XR_085778.2	NA	NA	NA	NA	NA_x000D_
CUST_4378_PI428311958	8.49039	P	9.53613	P	0.484396	2.06442	down	0	CUST_4378_PI428311958	0	lncRNA	NA	rn4_all_mrna_FQ229088 range=chr3:6971742-6973183 5'pad=0 3'pad=0 strand=+ repeatMasking=none	seq4404	FQ229088	NA	chr3	+	6971742	6973183_x000D_
CUST_9694_PI428311958	5.26664	P	6.30765	P	0.485988	2.05766	down	0	CUST_9694_PI428311958	0	lncRNA	NA	"gi|295852043|ref|XR_006091.3| PREDICTED: Rattus norvegicus similar to hypothetical protein MGC23280 (RGD1305508), miscRNA"	seq9795	XR_006091.3	NA	NA	NA	NA	NA_x000D_
CUST_3294_PI428311958	5.90102	P	6.94148	P	0.486173	2.05688	down	0	CUST_3294_PI428311958	0	lncRNA	NA	rn4_all_mrna_FQ231601 range=chr1:21044118-21060295 5'pad=0 3'pad=0 strand=- repeatMasking=none	seq3306	FQ231601	NA	chr1	-	21044118	21060295_x000D_
CUST_6833_PI428311958	6.93503	P	7.97088	P	0.487726	2.05033	down	0	CUST_6833_PI428311958	0	lncRNA	NA	rn4_all_mrna_AY325195 range=chrX:89339271-89347772 5'pad=0 3'pad=0 strand=- repeatMasking=none	seq6901	AY325195	NA	chrX	-	89339271	89347772_x000D_
CUST_7120_PI428311958	6.56987	P	7.60416	P	0.488258	2.0481	down	0	CUST_7120_PI428311958	0	lncRNA	NA	rn4_all_mrna_DQ025528 range=chr10:57296803-57300997 5'pad=0 3'pad=0 strand=- repeatMasking=none	seq7193	DQ025528	NA	chr10	-	57296803	57300997_x000D_
CUST_9361_PI428311958	7.60941	P	8.64262	P	0.488622	2.04657	down	0	CUST_9361_PI428311958	0	lncRNA	NA	"gi|293347905|ref|XR_085849.1| PREDICTED: Rattus norvegicus RGD1560224 (RGD1560224), miscRNA"	seq9462	XR_085849.1	NA	NA	NA	NA	NA_x000D_
CUST_2078_PI428311958	7.22454	P	8.25649	P	0.489049	2.04479	down	0	CUST_2078_PI428311958	0	lncRNA	NA	"chr1|mm9_knownGene_uc009imr.2| strand:+ 157605907-157606171,157606213-157606324,157629401-157629565,157631403-157631512,157632466-157632550,157634537-157634620,157637712-157637905,157639521-157639710,157640009-157640106,157640765-157640901,157643291-157643384,157644044-157644157,157644624-157644813,157646524-157646657,157648617-157648988,"	seq2084	uc009imr.2	NA	chr1	+	157605904	157648992_x000D_
CUST_9607_PI428311958	6.7816	P	7.81321	P	0.489164	2.0443	down	0	CUST_9607_PI428311958	0	lncRNA	NA	"gi|295851804|ref|XR_085756.2| PREDICTED: Rattus norvegicus similar to mouse RING finger 1 (LOC684508), miscRNA"	seq9708	XR_085756.2	NA	NA	NA	NA	NA_x000D_
CUST_5306_PI428311958	7.69449	P	8.72599	P	0.4892	2.04415	down	0	CUST_5306_PI428311958	0	lncRNA	NA	rn4_all_mrna_FQ212607 range=chr5:82918729-82919799 5'pad=0 3'pad=0 strand=- repeatMasking=none	seq5351	FQ212607	NA	chr5	-	82918729	82919799_x000D_
CUST_1558_PI428311958	7.44646	P	8.47711	P	0.48949	2.04294	down	0	CUST_1558_PI428311958	0	lncRNA	NA	"chr1|mm9_knownGene_uc008gdo.2| strand:- 208131881-208131902,208131727-208131853,208131554-208131726,208131329-208131458,208130619-208130701,208130162-208130263,208129960-208130028,208129740-208129825,208129257-208129324,208129201-208129214,208129187-208129197,208128961-208129038,208128742-208128863,208128562-208128659,208127950-208128066,208127767-208127862,208127473-208127601,208127293-20812739…	seq1564	uc008gdo.2	NA	chr1	-	208126560	208131904_x000D_
CUST_7118_PI428311958	7.91095	P	8.94137	P	0.48957	2.04261	down	0	CUST_7118_PI428311958	0	lncRNA	NA	rn4_all_mrna_BC168958 range=chr10:56719987-56725045 5'pad=0 3'pad=0 strand=- repeatMasking=none	seq7191	BC168958	NA	chr10	-	56719987	56725045_x000D_
CUST_8311_PI428311958	5.62313	P	6.65349	P	0.48959	2.04252	down	0	CUST_8311_PI428311958	0	lncRNA	NA	rn4_all_mrna_FQ215304 range=chr16:10183592-10184800 5'pad=0 3'pad=0 strand=- repeatMasking=none	seq8401	FQ215304	NA	chr16	-	10183592	10184800_x000D_
CUST_3591_PI428311958	5.34295	A	6.37317	P	0.489636	2.04233	down	0	CUST_3591_PI428311958	0	lncRNA	NA	rn4_all_mrna_BC097426 range=chr1:179489521-179502763 5'pad=0 3'pad=0 strand=- repeatMasking=none	seq3606	BC097426	NA	chr1	-	179489521	179502763_x000D_
CUST_7786_PI428311958	6.83328	P	7.86227	P	0.490052	2.0406	down	0	CUST_7786_PI428311958	0	lncRNA	NA	rn4_all_mrna_FQ219903 range=chr13:87003139-87012447 5'pad=0 3'pad=0 strand=+ repeatMasking=none	seq7864	FQ219903	NA	chr13	+	87003139	87012447_x000D_
CUST_5259_PI428311958	7.00082	P	8.02968	P	0.490096	2.04042	down	0	CUST_5259_PI428311958	0	lncRNA	NA	rn4_all_mrna_BC168893 range=chr5:59199786-59204010 5'pad=0 3'pad=0 strand=- repeatMasking=none	seq5302	BC168893	NA	chr5	-	59199786	59204010_x000D_
CUST_504_PI428311958	7.94347	P	8.97227	P	0.490117	2.04033	down	0	CUST_504_PI428311958	0	lncRNA	NA	"chr15|mm9_knownGene_uc011zgj.1| strand:- 4856942-4856952,4856645-4856941,4855647-4855945,4845549-4845784,4840560-4840832,4840143-4840527,4831778-4831929,4830973-4831221,4830367-4830564,4828821-4829051,4820883-4821026,4820233-4820357,4819459-4819464,4819123-4819264,4813500-4813619,4812486-4812734,4809136-4809361,4808355-4808524,4806311-4806443,4805664-4805832,4803858-4804015,4802759-4802882,48018…	seq506	uc011zgj.1	NA	chr15	-	4801182	4856952_x000D_
CUST_3537_PI428311958	8.65893	P	9.68773	P	0.49012	2.04032	down	0	CUST_3537_PI428311958	0	lncRNA	NA	rn4_all_mrna_FQ230356 range=chr1:157926807-157928519 5'pad=0 3'pad=0 strand=+ repeatMasking=none	seq3551	FQ230356	NA	chr1	+	157926807	157928519_x000D_
CUST_2532_PI428311958	8.56804	P	9.5957	P	0.490507	2.03871	down	0	CUST_2532_PI428311958	0	lncRNA	NA	"chr15|ri|E330015J04|PX00675D12|1730| strand:+ 22287024-22287116,22287123-22287206,22287211-22287224,22287237-22287266,22287268-22287282,22287284-22287358,22287359-22287589,22287590-22287652,22287655-22287664,22287669-22287733,22287734-22287834,22287840-22287869,22287871-22287886,22287887-22287938,22287962-22287995,22288005-22288020,22288022-22288036,22288047-22288074,22288078-22288093,22288094-2…	seq2541	PX00675D12	NA	chr15	+	22287024	22288702_x000D_
CUST_5106_PI428311958	5.76724	P	6.79256	P	0.491304	2.0354	down	0	CUST_5106_PI428311958	0	lncRNA	NA	rn4_all_mrna_FQ212492 range=chr4:165360633-165360916 5'pad=0 3'pad=0 strand=+ repeatMasking=none	seq5143	FQ212492	NA	chr4	+	165360633	165360916_x000D_
CUST_4186_PI428311958	7.57985	P	8.60497	P	0.491367	2.03514	down	0	CUST_4186_PI428311958	0	lncRNA	NA	rn4_all_mrna_FQ225019 range=chr2:190803103-190804068 5'pad=0 3'pad=0 strand=+ repeatMasking=none	seq4209	FQ225019	NA	chr2	+	190803103	190804068_x000D_
CUST_5852_PI428311958	7.17891	P	8.20135	P	0.492283	2.03135	down	0	CUST_5852_PI428311958	0	lncRNA	NA	rn4_all_mrna_FQ233318 range=chr7:36683692-36765868 5'pad=0 3'pad=0 strand=+ repeatMasking=none	seq5904	FQ233318	NA	chr7	+	36683692	36765868_x000D_
CUST_4111_PI428311958	5.2983	A	6.32002	P	0.492527	2.03035	down	0	CUST_4111_PI428311958	0	lncRNA	NA	rn4_all_mrna_FQ234575 range=chr2:170645853-170647046 5'pad=0 3'pad=0 strand=- repeatMasking=none	seq4134	FQ234575	NA	chr2	-	170645853	170647046_x000D_
CUST_9095_PI428311958	12.0038	P	13.0251	P	0.492671	2.02975	down	0	CUST_9095_PI428311958	0	lncRNA	NA	rn4_all_mrna_FQ217833 range=chrUn:22042971-22153549 5'pad=0 3'pad=0 strand=+ repeatMasking=none	seq9195	FQ217833	NA	chrUn	+	22042971	22153549_x000D_
CUST_2170_PI428311958	6.24659	P	7.26595	P	0.493334	2.02702	down	0	CUST_2170_PI428311958	0	lncRNA	NA	"chr19|ri|5830424O13|PX00746D21|1807| strand:- 45859483-45859494,45859432-45859482,45859393-45859431,45859385-45859391,45859235-45859369,45859152-45859234,45859104-45859150,45859054-45859099,45858963-45859044,45858686-45858962,45858655-45858684,45858641-45858651,45858629-45858640,45858501-45858628,45858467-45858498,45858380-45858465,45858285-45858379,45858228-45858283,45858158-45858226,45858151-4…	seq2176	PX00746D21	NA	chr19	-	45857732	45859496_x000D_
CUST_756_PI428311958	8.65015	P	9.66878	P	0.493584	2.026	down	0	CUST_756_PI428311958	0	lncRNA	NA	"chr3|gi|377834944|ref|XR_140558.1|| strand:+ 170446798-170446911,170446912-170447003,170447004-170447141,170452882-170452887,170454828-170454934,"	seq759	XR_140558.1	NA	chr3	+	170446798	170454934_x000D_
CUST_2745_PI428311958	9.76614	P	10.7829	P	0.494226	2.02337	down	0	CUST_2745_PI428311958	0	lncRNA	NA	"chr19|mm9_knownGene_uc009nxr.1| strand:+ 55014073-55014212,55033250-55033281,55033335-55033529,55033530-55033535,55033549-55033603,55033605-55033864,55033865-55033904,55033905-55033925,55033944-55033961,55033976-55034115,55034143-55034153,55034199-55034215,55034218-55034223,55034234-55034261,"	seq2754	uc009nxr.1	NA	chr19	+	55014072	55034260_x000D_
CUST_9350_PI428311958	7.78206	P	8.79753	P	0.494667	2.02156	down	0	CUST_9350_PI428311958	0	lncRNA	NA	"gi|293347333|ref|XR_085837.1| PREDICTED: Rattus norvegicus similar to RUN and SH3 domain-containing protein 2 (LOC684259), miscRNA"	seq9451	XR_085837.1	NA	NA	NA	NA	NA_x000D_
CUST_9558_PI428311958	5.69379	P	6.70886	P	0.494804	2.021	down	0	CUST_9558_PI428311958	0	lncRNA	NA	"gi|295851677|ref|XR_085647.2| PREDICTED: Rattus norvegicus similar to Low-density lipoprotein receptor-related protein 4 precursor (LDLR dan) (RGD1565014), miscRNA"	seq9659	XR_085647.2	NA	NA	NA	NA	NA_x000D_
CUST_2695_PI428311958	10.0051	P	11.0189	P	0.495253	2.01917	down	0	CUST_2695_PI428311958	0	lncRNA	NA	"chr2|mm9_knownGene_uc007rqe.2| strand:+ 31133593-31133716,31133720-31133724,31133725-31133730,31133734-31133743,31133744-31133750,31133751-31133803,31134640-31134753,31136418-31136571,31136573-31136576,31136581-31136618,"	seq2704	uc007rqe.2	NA	chr2	+	31133592	31136618_x000D_
CUST_5918_PI428311958	6.85447	P	7.86754	P	0.49549	2.01821	down	0	CUST_5918_PI428311958	0	lncRNA	NA	rn4_all_mrna_FQ232733 range=chr7:19676468-19677373 5'pad=0 3'pad=0 strand=- repeatMasking=none	seq5972	FQ232733	NA	chr7	-	19676468	19677373_x000D_
CUST_5198_PI428311958	5.36724	P	6.3787	P	0.496044	2.01595	down	0	CUST_5198_PI428311958	0	lncRNA	NA	rn4_all_mrna_FQ213965 range=chr5:10358144-10359062 5'pad=0 3'pad=0 strand=+ repeatMasking=none	seq5239	FQ213965	NA	chr5	+	10358144	10359062_x000D_
CUST_4904_PI428311958	4.46471	A	5.47375	P	0.496875	2.01258	down	0	CUST_4904_PI428311958	0	lncRNA	NA	rn4_all_mrna_AY325199 range=chr4:77213559-77228004 5'pad=0 3'pad=0 strand=- repeatMasking=none	seq4938	AY325199	NA	chr4	-	77213559	77228004_x000D_
CUST_5985_PI428311958	6.10919	P	7.11539	P	0.497855	2.00862	down	0	CUST_5985_PI428311958	0	lncRNA	NA	rn4_all_mrna_FQ230919 range=chr7:56658059-56658915 5'pad=0 3'pad=0 strand=- repeatMasking=none	seq6040	FQ230919	NA	chr7	-	56658059	56658915_x000D_
CUST_4073_PI428311958	8.47948	P	9.4829	P	0.498817	2.00474	down	0	CUST_4073_PI428311958	0	lncRNA	NA	rn4_all_mrna_FQ220238 range=chr2:146710922-146711825 5'pad=0 3'pad=0 strand=- repeatMasking=none	seq4096	FQ220238	NA	chr2	-	146710922	146711825_x000D_
CUST_531_PI428311958	4.18286	A	5.18593	P	0.498939	2.00425	down	0	CUST_531_PI428311958	0	lncRNA	NA	"chr19|mm9_knownGene_uc009mky.2| strand:+ 26132490-26132668,26132669-26132687,26133589-26133656,26139111-26139403,26141414-26141566,26142506-26142585,26142602-26142609,26142615-26142648,26145113-26145260,26145642-26145707,26145708-26145713,26145718-26145855,26146896-26147069,26147070-26147074,26147076-26147086,26149091-26149094,26149574-26149683,26149769-26149912,26152818-26152899,26152983-261531…	seq533	uc009mky.2	NA	chr19	+	26132490	26160665_x000D_
CUST_3386_PI428311958	6.94202	P	7.94399	P	0.499319	2.00273	down	0	CUST_3386_PI428311958	0	lncRNA	NA	rn4_all_mrna_AB434131 range=chr1:80110623-80126498 5'pad=0 3'pad=0 strand=+ repeatMasking=none	seq3398	AB434131	NA	chr1	+	80110623	80126498_x000D_
CUST_1666_PI428311958	6.90097	P	7.90282	P	0.49936	2.00256	down	0	CUST_1666_PI428311958	0	lncRNA	NA	"chr7|mm9_knownGene_uc007wcb.1| strand:- 111105624-111105665,111105570-111105623,111068052-111068278,"	seq1672	uc007wcb.1	NA	chr7	-	111068048	111105664_x000D_
CUST_6175_PI428311958	7.72893	P	8.72941	P	0.499832	2.00067	down	0	CUST_6175_PI428311958	0	lncRNA	NA	rn4_all_mrna_DQ188032 range=chr8:54237371-54337532 5'pad=0 3'pad=0 strand=- repeatMasking=none	seq6236	DQ188032	NA	chr8	-	54237371	54337532_x000D_

## Sheet: up-16
ProbeName	foldchange	列1	列2
CUST_6253_PI428311958	29.3044
CUST_8359_PI428311958	23.5742
CUST_8135_PI428311958	21.6726
CUST_787_PI428311958	18.578
CUST_5947_PI428311958	16.6898
CUST_446_PI428311958	16.0828
CUST_5041_PI428311958	14.2599
CUST_305_PI428311958	13.1364
CUST_6233_PI428311958	12.7725
CUST_7638_PI428311958	12.4382
CUST_279_PI428311958	11.9485
CUST_3553_PI428311958	11.5117
CUST_3255_PI428311958	10.3345
CUST_7370_PI428311958	10.2393
CUST_2918_PI428311958	10.2295
CUST_677_PI428311958	10.1697
ProbeName2	foldchange3
CUST_3471_PI428311958	36.8492
CUST_458_PI428311958	19.6198
CUST_5519_PI428311958	18.8504
CUST_2111_PI428311958	17.1494
CUST_9135_PI428311958	15.4195
CUST_8347_PI428311958	14.3274
CUST_2931_PI428311958	13.491
CUST_4808_PI428311958	12.7988
CUST_6638_PI428311958	12.136
CUST_4899_PI428311958	12.025
CUST_396_PI428311958	11.7475
CUST_8936_PI428311958	11.4527
CUST_6637_PI428311958	11.3155
CUST_8558_PI428311958	11.2742
CUST_6993_PI428311958	11.1835
CUST_4393_PI428311958	10.9852
CUST_8371_PI428311958	10.5959

## Sheet: down-17
ProbeName	foldchange	Regulation	ProbeName2	foldchange2	Regulation2
CUST_6253_PI428311958	29.3044	up	CUST_3471_PI428311958	36.8492	down
CUST_8359_PI428311958	23.5742	up	CUST_458_PI428311958	19.6198	down
CUST_8135_PI428311958	21.6726	up	CUST_5519_PI428311958	18.8504	down
CUST_787_PI428311958	18.578	up	CUST_2111_PI428311958	17.1494	down
CUST_5947_PI428311958	16.6898	up	CUST_9135_PI428311958	15.4195	down
CUST_446_PI428311958	16.0828	up	CUST_8347_PI428311958	14.3274	down
CUST_5041_PI428311958	14.2599	up	CUST_2931_PI428311958	13.491	down
CUST_305_PI428311958	13.1364	up	CUST_4808_PI428311958	12.7988	down
CUST_6233_PI428311958	12.7725	up	CUST_6638_PI428311958	12.136	down
CUST_7638_PI428311958	12.4382	up	CUST_4899_PI428311958	12.025	down
CUST_279_PI428311958	11.9485	up	CUST_396_PI428311958	11.7475	down
CUST_3553_PI428311958	11.5117	up	CUST_8936_PI428311958	11.4527	down
CUST_3255_PI428311958	10.3345	up	CUST_6637_PI428311958	11.3155	down
CUST_7370_PI428311958	10.2393	up	CUST_8558_PI428311958	11.2742	down
CUST_2918_PI428311958	10.2295	up	CUST_6993_PI428311958	11.1835	down
CUST_677_PI428311958	10.1697	up	CUST_4393_PI428311958	10.9852	down
			CUST_8371_PI428311958	10.5959	down
