# Supplementary material for: The difference in expression of long noncoding RNAs in rat semen induced by high-fat diet was associated with metabolic pathways
Source: PeerJ. 2017 Jul 25;5:e3518. doi: 10.7717/peerj.3518 (PMC5530988; doi:10.7717/peerj.3518)
Supplement: Data S3 [file peerj-05-3518-s003.xlsx]

## Sheet: DIO_VS_Normol_fc2
Fold-Change cut-off: 2.0
P-value cut-off: 0.05
compare: ZhengC_VS_Gaozhi
foldchange:the ratio ( not logarithm) of normalized intensities between two conditions.
foldchange (abs):the absolute ratio (not logarithm) of normalized intensities between two conditions.
Probe ID	Normalized signal (log2) of Gaozhi	Detection of Gaozhi	Normalized signal (log2) of ZhengC	Detection of ZhengC	Fold Change			Annotation
ProbeName	Gaozhi_NS	Gaozhi_flags	ZhengC_NS	ZhengC_flags	foldchange	foldchange(abs)	Regulation	ControlType	ProbeName.1	ControlType.1	Classify	GeneSymbol	Description	Seq_id	Target_id	Target_id_1	Target_chr	Target_strand	Target_start	Target_end_x000D_
RAT08111	9.38502	P	11.6585	P	0.206837	4.83473	down	0	RAT08111	0	mRNA	Tmem158	transmembrane protein 158	NA	NA	NM_057212	NA	NA	NA	NA_x000D_
RAT30257	6.46509	P	5.37897	A	2.12303	2.12303	up	0	RAT30257	0	mRNA	NA	NA	NA	NA	ENSRNOT00000043161	NA	NA	NA	NA_x000D_
RAT28080	4.29197	A	5.77346	P	0.358121	2.79235	down	0	RAT28080	0	mRNA	Il20rb	interleukin 20 receptor beta	NA	NA	NM_001173438	NA	NA	NA	NA_x000D_
RAT03993	7.73944	P	6.61234	P	2.1842	2.1842	up	0	RAT03993	0	mRNA	Tctex1d2	Tctex1 domain containing 2	NA	NA	NM_001109054	NA	NA	NA	NA_x000D_
RAT18599	14.4159	P	13.2344	P	2.26824	2.26824	up	0	RAT18599	0	mRNA	Defb43	defensin beta 43	NA	NA	NM_001037528	NA	NA	NA	NA_x000D_
RAT27583	6.63898	P	4.99291	A	3.1298	3.1298	up	0	RAT27583	0	mRNA	NA	NA	NA	NA	TC637520	NA	NA	NA	NA_x000D_
RAT18919	8.42943	P	7.2278	P	2.3	2.3	up	0	RAT18919	0	mRNA	Fam84a	"family with sequence similarity 84, member A"	NA	NA	NM_001127299	NA	NA	NA	NA_x000D_
RAT24073	9.75998	P	10.8458	P	0.471138	2.12252	down	0	RAT24073	0	mRNA	Lmo7	LIM domain 7	NA	NA	NM_001001515	NA	NA	NA	NA_x000D_
RAT24758	13.1823	P	14.4649	P	0.411038	2.43286	down	0	RAT24758	0	mRNA	Crat	carnitine O-acetyltransferase	NA	NA	NM_001004085	NA	NA	NA	NA_x000D_
RAT29482	5.67521	P	3.4676	A	4.61912	4.61912	up	0	RAT29482	0	mRNA	Hist1h2bh	"histone cluster 1, H2bh"	NA	NA	NM_001107352	NA	NA	NA	NA_x000D_
RAT28964	5.41885	P	3.69196	A	3.31012	3.31012	up	0	RAT28964	0	mRNA	Cbx2	chromobox homolog 2	NA	NA	NM_001107071	NA	NA	NA	NA_x000D_
RAT04105	4.05276	A	7.91423	P	0.0687993	14.535	down	0	RAT04105	0	mRNA	S100a8	S100 calcium binding protein A8	NA	NA	NM_053822	NA	NA	NA	NA_x000D_
RAT28650	8.80197	P	10.3048	P	0.352854	2.83404	down	0	RAT28650	0	mRNA	Cmtm2a	CKLF-like MARVEL transmembrane domain containing 2A	NA	NA	NM_001013142	NA	NA	NA	NA_x000D_
RAT03013	6.66163	P	5.31992	A	2.53452	2.53452	up	0	RAT03013	0	mRNA	Ovol2	ovo-like 2 (Drosophila)	NA	NA	NM_001106519	NA	NA	NA	NA_x000D_
RAT20449	9.81452	P	10.9599	P	0.452066	2.21207	down	0	RAT20449	0	mRNA	Lmo7	LIM domain 7	NA	NA	NM_001001515	NA	NA	NA	NA_x000D_
RAT26332	6.5181	P	7.75826	P	0.423325	2.36225	down	0	RAT26332	0	mRNA	Defb33	defensin beta 33	NA	NA	NM_001037523	NA	NA	NA	NA_x000D_
RAT04067	4.9849	A	7.04093	P	0.240476	4.15842	down	0	RAT04067	0	mRNA	Loxl2	lysyl oxidase-like 2	NA	NA	NM_001106047	NA	NA	NA	NA_x000D_
RAT26355	6.03188	P	4.43064	A	3.03406	3.03406	up	0	RAT26355	0	mRNA	Depdc5	DEP domain containing 5	NA	NA	NM_001107229	NA	NA	NA	NA_x000D_
RAT08228	6.34693	P	2.86038	A	11.2087	11.2087	up	0	RAT08228	0	mRNA	LOC680262	hypothetical protein LOC680262	NA	NA	XM_001056376	NA	NA	NA	NA_x000D_
RAT23675	4.51307	A	6.25253	P	0.299481	3.33911	down	0	RAT23675	0	mRNA	NA	NA	NA	NA	NA	NA	NA	NA	NA_x000D_
RAT26284	6.83654	P	3.67466	A	8.94991	8.94991	up	0	RAT26284	0	mRNA	Slc7a4	"solute carrier family 7 (cationic amino acid transporter, y+ system), member 4"	NA	NA	NM_001107078	NA	NA	NA	NA_x000D_
RAT17183	5.62973	P	7.51926	P	0.269893	3.70517	down	0	RAT17183	0	mRNA	NA	NA	NA	NA	ENSRNOT00000043269	NA	NA	NA	NA_x000D_
RAT05802	5.11949	A	6.37328	P	0.419345	2.38467	down	0	RAT05802	0	mRNA	Glt1d1	glycosyltransferase 1 domain containing 1	NA	NA	ENSRNOT00000064526	NA	NA	NA	NA_x000D_
RAT06672	5.7333	P	4.032	A	3.25194	3.25194	up	0	RAT06672	0	mRNA	Il1a	interleukin 1 alpha	NA	NA	NM_017019	NA	NA	NA	NA_x000D_
RAT25763	6.32887	P	4.33001	A	3.99682	3.99682	up	0	RAT25763	0	mRNA	Kbtbd3	kelch repeat and BTB (POZ) domain containing 3	NA	NA	NM_001108121	NA	NA	NA	NA_x000D_
RAT09817	5.77545	P	3.0587	A	6.57391	6.57391	up	0	RAT09817	0	mRNA	Paip1	poly(A) binding protein interacting protein 1	NA	NA	NM_001108937	NA	NA	NA	NA_x000D_
RAT03758	6.74145	P	5.28148	A	2.75102	2.75102	up	0	RAT03758	0	mRNA	Gtf2e2	"general transcription factor IIE, polypeptide 2, beta"	NA	NA	NM_001107318	NA	NA	NA	NA_x000D_
RAT00259	4.89632	A	6.66459	P	0.29356	3.40645	down	0	RAT00259	0	mRNA	Tnfaip2	"tumor necrosis factor, alpha-induced protein 2"	NA	NA	NM_001137633	NA	NA	NA	NA_x000D_
RAT03011	8.65379	P	7.55882	P	2.13609	2.13609	up	0	RAT03011	0	mRNA	Jagn1	jagunal homolog 1 (Drosophila)	NA	NA	NM_001044272	NA	NA	NA	NA_x000D_
RAT22914	5.87663	P	3.77095	A	4.304	4.304	up	0	RAT22914	0	mRNA	NA	NA	NA	NA	ENSRNOT00000059231	NA	NA	NA	NA_x000D_
RAT01044	6.5652	P	4.64704	A	3.7794	3.7794	up	0	RAT01044	0	mRNA	RGD1311558	similar to 4930506M07Rik protein	NA	NA	NM_001079705	NA	NA	NA	NA_x000D_
RAT05563	8.97136	P	6.6248	P	5.0861	5.0861	up	0	RAT05563	0	mRNA	Tfrc	transferrin receptor	NA	NA	NM_022712	NA	NA	NA	NA_x000D_
RAT06966	5.94667	P	4.69162	A	2.38676	2.38676	up	0	RAT06966	0	mRNA	Pknox1	PBX/knotted 1 homeobox 1	NA	NA	NM_001013074	NA	NA	NA	NA_x000D_
RAT15545	6.96873	P	10.204	P	0.106187	9.41732	down	0	RAT15545	0	mRNA	LOC306365	similar to ankyrin repeat domain 26	NA	NA	XM_224750	NA	NA	NA	NA_x000D_
RAT05056	6.33004	P	5.11394	A	2.32318	2.32318	up	0	RAT05056	0	mRNA	NA	NA	NA	NA	XM_218396	NA	NA	NA	NA_x000D_
RAT17202	8.75975	P	10.4679	P	0.306046	3.26748	down	0	RAT17202	0	mRNA	LOC363337	similar to RIKEN cDNA 1700081O22	NA	NA	NM_001014221	NA	NA	NA	NA_x000D_
RAT22175	4.40591	A	7.50453	P	0.116741	8.56595	down	0	RAT22175	0	mRNA	Galnt14	UDP-N-acetyl-alpha-D-galactosamine:polypeptide N-acetylgalactosaminyltransferase 14 (GalNAc-T14)	NA	NA	NM_001012109	NA	NA	NA	NA_x000D_
RAT12217	5.63333	P	4.09567	A	2.90324	2.90324	up	0	RAT12217	0	mRNA	Zfp639	zinc finger protein 639	NA	NA	NM_001080907	NA	NA	NA	NA_x000D_
RAT15538	8.47299	P	9.69559	P	0.42851	2.33367	down	0	RAT15538	0	mRNA	RGD1560394	RGD1560394	NA	NA	NM_001106014	NA	NA	NA	NA_x000D_
RAT27579	6.43241	P	4.91261	A	2.86753	2.86753	up	0	RAT27579	0	mRNA	Ddx59	DEAD (Asp-Glu-Ala-Asp) box polypeptide 59	NA	NA	NM_001190820	NA	NA	NA	NA_x000D_
RAT19161	5.3094	P	6.43817	P	0.457305	2.18672	down	0	RAT19161	0	mRNA	Fgfr1	Fibroblast growth factor receptor 1	NA	NA	NM_024146	NA	NA	NA	NA_x000D_
RAT30263	9.97192	P	11.5331	P	0.338884	2.95086	down	0	RAT30263	0	mRNA	Pan3	PAN3 polyA specific ribonuclease subunit homolog (S. cerevisiae)	NA	NA	ENSRNOT00000044134	NA	NA	NA	NA_x000D_
RAT25953	7.38412	P	8.58401	P	0.435308	2.29722	down	0	RAT25953	0	mRNA	NA	NA	NA	NA	NA	NA	NA	NA	NA_x000D_
RAT00805	10.0018	P	12.9838	P	0.12657	7.90078	down	0	RAT00805	0	mRNA	C1r	"complement component 1, r subcomponent"	NA	NA	NM_001134555	NA	NA	NA	NA_x000D_
RAT20315	4.85781	A	6.35653	P	0.353867	2.82592	down	0	RAT20315	0	mRNA	NA	NA	NA	NA	ENSRNOT00000038160	NA	NA	NA	NA_x000D_
RAT17668	5.04645	A	6.06878	P	0.49232	2.0312	down	0	RAT17668	0	mRNA	NA	NA	NA	NA	NA	NA	NA	NA	NA_x000D_
RAT20385	6.61038	P	2.80445	A	13.9862	13.9862	up	0	RAT20385	0	mRNA	Birc7	baculoviral IAP repeat-containing 7	NA	NA	XM_001058257	NA	NA	NA	NA_x000D_
RAT03890	8.07909	P	7.0029	P	2.10846	2.10846	up	0	RAT03890	0	mRNA	Txndc9	thioredoxin domain containing 9	NA	NA	NM_172032	NA	NA	NA	NA_x000D_
RAT14165	6.91405	P	7.94551	P	0.489215	2.04409	down	0	RAT14165	0	mRNA	Slc16a6	"solute carrier family 16, member 6 (monocarboxylic acid transporter 7)"	NA	NA	NM_198760	NA	NA	NA	NA_x000D_
RAT19480	4.9445	A	6.60265	P	0.316844	3.15613	down	0	RAT19480	0	mRNA	NA	NA	NA	NA	NA	NA	NA	NA	NA_x000D_
RAT12309	10.0704	P	12.0038	P	0.261806	3.81962	down	0	RAT12309	0	mRNA	Cav1	"caveolin 1, caveolae protein"	NA	NA	NM_133651	NA	NA	NA	NA_x000D_
RAT01683	8.73651	P	7.68011	P	2.07974	2.07974	up	0	RAT01683	0	mRNA	NA	NA	NA	NA	ENSRNOT00000011768	NA	NA	NA	NA_x000D_
RAT00625	6.44635	P	4.9088	A	2.90302	2.90302	up	0	RAT00625	0	mRNA	Cep78	centrosomal protein 78	NA	NA	NM_021741	NA	NA	NA	NA_x000D_
RAT11520	7.6108	P	8.65742	P	0.484101	2.06569	down	0	RAT11520	0	mRNA	Tulp2	tubby-like protein 2	NA	NA	NM_001012168	NA	NA	NA	NA_x000D_
RAT00204	6.57352	P	5.43642	P	2.19938	2.19938	up	0	RAT00204	0	mRNA	Ncoa7	nuclear receptor coactivator 7	NA	NA	ENSRNOT00000018849	NA	NA	NA	NA_x000D_
RAT01032	10.6833	P	9.29325	P	2.62087	2.62087	up	0	RAT01032	0	mRNA	Atp6v0d2	"ATPase, H+ transporting, lysosomal V0 subunit D2"	NA	NA	NM_001011972	NA	NA	NA	NA_x000D_
RAT00102	8.84613	P	7.84586	P	2.00038	2.00038	up	0	RAT00102	0	mRNA	RGD1561113	similar to Hypothetical UPF0184 protein C9orf16 homolog	NA	NA	ENSRNOT00000034930	NA	NA	NA	NA_x000D_
RAT25908	9.38584	P	10.3933	P	0.497432	2.01033	down	0	RAT25908	0	mRNA	NA	NA	NA	NA	TC588511	NA	NA	NA	NA_x000D_
RAT07238	6.12267	P	4.79772	A	2.50523	2.50523	up	0	RAT07238	0	mRNA	Eif2b3	"eukaryotic translation initiation factor 2B, subunit 3"	NA	NA	NM_133609	NA	NA	NA	NA_x000D_
RAT08338	4.552	A	5.56509	P	0.495484	2.01823	down	0	RAT08338	0	mRNA	Chn2	chimerin (chimaerin) 2	NA	NA	NM_032084	NA	NA	NA	NA_x000D_
RAT01540	6.62367	P	8.9222	P	0.20327	4.91957	down	0	RAT01540	0	mRNA	Npy	neuropeptide Y	NA	NA	NM_012614	NA	NA	NA	NA_x000D_
RAT04855	8.72958	P	10.0224	P	0.408144	2.45012	down	0	RAT04855	0	mRNA	Mypn	myopalladin	NA	NA	NM_001107628	NA	NA	NA	NA_x000D_
RAT27306	5.9869	P	4.00356	A	3.95406	3.95406	up	0	RAT27306	0	mRNA	NA	NA	NA	NA	NA	NA	NA	NA	NA_x000D_
RAT03382	10.5177	P	11.8633	P	0.393488	2.54138	down	0	RAT03382	0	mRNA	Spata3	spermatogenesis associated 3	NA	NA	NM_001108805	NA	NA	NA	NA_x000D_
RAT04360	7.58759	P	6.23113	P	2.56056	2.56056	up	0	RAT04360	0	mRNA	Slc24a5	"solute carrier family 24, member 5"	NA	NA	NM_001107769	NA	NA	NA	NA_x000D_
RAT18928	6.53957	P	7.65354	P	0.46202	2.16441	down	0	RAT18928	0	mRNA	RGD1563528	similar to Brain protein 44-like	NA	NA	NM_001109365	NA	NA	NA	NA_x000D_
RAT00709	6.05609	P	4.71677	A	2.53032	2.53032	up	0	RAT00709	0	mRNA	Filip1	filamin A interacting protein 1	NA	NA	NM_145682	NA	NA	NA	NA_x000D_
RAT04460	7.22564	P	9.24374	P	0.246883	4.0505	down	0	RAT04460	0	mRNA	Pbx4	pre-B-cell leukemia homeobox 4	NA	NA	NM_001108399	NA	NA	NA	NA_x000D_
RAT16549	6.99717	P	5.51051	A	2.8024	2.8024	up	0	RAT16549	0	mRNA	LOC498368	similar to RIKEN cDNA 0610040J01	NA	NA	NM_001017500	NA	NA	NA	NA_x000D_
RAT18916	6.47691	P	5.01706	A	2.75079	2.75079	up	0	RAT18916	0	mRNA	Fam81a	"family with sequence similarity 81, member A"	NA	NA	NM_001108163	NA	NA	NA	NA_x000D_
RAT26301	6.77736	P	8.51075	P	0.300745	3.32508	down	0	RAT26301	0	mRNA	NA	NA	NA	NA	ENSRNOT00000034474	NA	NA	NA	NA_x000D_
RAT10275	7.81102	P	9.14405	P	0.396935	2.51931	down	0	RAT10275	0	mRNA	Ppp1r9b	"protein phosphatase 1, regulatory subunit 9B"	NA	NA	NM_053474	NA	NA	NA	NA_x000D_
RAT13878	5.38821	A	6.64793	P	0.417623	2.3945	down	0	RAT13878	0	mRNA	NA	NA	NA	NA	NA	NA	NA	NA	NA_x000D_
RAT20661	18.5535	P	17.5531	P	2.00064	2.00064	up	0	RAT20661	0	mRNA	Wfdc10	WAP four-disulfide core domain 10	NA	NA	NM_001109461	NA	NA	NA	NA_x000D_
RAT14683	11.3193	P	12.3528	P	0.488543	2.0469	down	0	RAT14683	0	mRNA	Hmgb4	high-mobility group box 4	NA	NA	NM_001109463	NA	NA	NA	NA_x000D_
RAT18592	6.16649	P	7.31851	P	0.449993	2.22226	down	0	RAT18592	0	mRNA	NA	NA	NA	NA	NA	NA	NA	NA	NA_x000D_
RAT12400	7.9202	P	6.52934	P	2.62234	2.62234	up	0	RAT12400	0	mRNA	Ces1e	carboxylesterase 1E	NA	NA	NM_031565	NA	NA	NA	NA_x000D_
RAT11082	11.2649	P	9.67583	P	3.00853	3.00853	up	0	RAT11082	0	mRNA	Galm	galactose mutarotase (aldose 1-epimerase)	NA	NA	NM_001007704	NA	NA	NA	NA_x000D_
RAT19254	11.1785	P	13.3057	P	0.228895	4.36882	down	0	RAT19254	0	mRNA	NA	NA	NA	NA	ENSRNOT00000036793	NA	NA	NA	NA_x000D_
RAT07477	5.77742	P	4.33066	A	2.72596	2.72596	up	0	RAT07477	0	mRNA	Rfwd3	ring finger and WD repeat domain 3	NA	NA	ENSRNOT00000025604	NA	NA	NA	NA_x000D_
RAT06183	6.26332	P	7.34758	P	0.471632	2.1203	down	0	RAT06183	0	mRNA	Snx32	sorting nexin 32	NA	NA	ENSRNOT00000036745	NA	NA	NA	NA_x000D_
RAT01120	10.6077	P	9.14862	P	2.74934	2.74934	up	0	RAT01120	0	mRNA	Commd10	COMM domain containing 10	NA	NA	NM_001004276	NA	NA	NA	NA_x000D_
RAT24760	6.51502	P	4.03186	A	5.59123	5.59123	up	0	RAT24760	0	mRNA	Cpsf2	cleavage and polyadenylation specific factor 2	NA	NA	NM_001106753	NA	NA	NA	NA_x000D_
RAT26925	6.07764	P	7.208	P	0.4568	2.18914	down	0	RAT26925	0	mRNA	Omd	osteomodulin	NA	NA	NM_031817	NA	NA	NA	NA_x000D_
RAT13656	7.86091	P	6.4195	P	2.71588	2.71588	up	0	RAT13656	0	mRNA	Slc9a2	"solute carrier family 9 (sodium/hydrogen exchanger), member 2"	NA	NA	NM_001113335	NA	NA	NA	NA_x000D_
RAT24473	5.44106	P	7.58989	P	0.225495	4.43468	down	0	RAT24473	0	mRNA	Fam25a	"family with sequence similarity 25, member A"	NA	NA	NM_001134849	NA	NA	NA	NA_x000D_
RAT13733	6.56726	P	7.71437	P	0.451529	2.2147	down	0	RAT13733	0	mRNA	Specc1	sperm antigen with calponin homology and coiled-coil domains 1	NA	NA	NM_001039017	NA	NA	NA	NA_x000D_
RAT08395	5.49077	P	3.31163	A	4.52882	4.52882	up	0	RAT08395	0	mRNA	Mllt10	"myeloid/lymphoid or mixed-lineage leukemia (trithorax homolog, Drosophila); translocated to, 10"	NA	NA	NM_001012162	NA	NA	NA	NA_x000D_
RAT17853	9.60576	P	11.527	P	0.264019	3.78761	down	0	RAT17853	0	mRNA	RGD1560286	"similar to DNA segment, Chr 4, ERATO Doi 22, expressed"	NA	NA	NM_001114599	NA	NA	NA	NA_x000D_
A_44_P761041	7.15835	P	4.93626	A	4.66569	4.66569	up	0	A_44_P761041	0	mRNA	Trim2	tripartite motif-containing 2	NA	NA	NM_001108552	NA	NA	NA	NA_x000D_
RAT09733	10.638	P	9.63637	P	2.00223	2.00223	up	0	RAT09733	0	mRNA	Surf4	surfeit 4	NA	NA	NM_001033868	NA	NA	NA	NA_x000D_
RAT16069	9.17651	P	7.09184	P	4.24177	4.24177	up	0	RAT16069	0	mRNA	RGD1560925	similar to 2610034M16Rik protein	NA	NA	ENSRNOT00000014921	NA	NA	NA	NA_x000D_
RAT01430	7.56107	P	6.01768	P	2.9148	2.9148	up	0	RAT01430	0	mRNA	Mtmr4	myotubularin related protein 4	NA	NA	NM_001105827	NA	NA	NA	NA_x000D_
RAT07457	6.81427	P	3.44489	A	10.3344	10.3344	up	0	RAT07457	0	mRNA	Slc46a1	"solute carrier family 46 (folate transporter), member 1"	NA	NA	NM_001013969	NA	NA	NA	NA_x000D_
RAT05274	6.66369	P	5.6248	P	2.05464	2.05464	up	0	RAT05274	0	mRNA	Carkd	carbohydrate kinase domain containing	NA	NA	NM_001108402	NA	NA	NA	NA_x000D_
RAT02635	6.53898	P	5.07348	A	2.7616	2.7616	up	0	RAT02635	0	mRNA	Rap1gap2	RAP1 GTPase activating protein 2	NA	NA	NM_001107019	NA	NA	NA	NA_x000D_
RAT10089	2.9463	A	5.56856	P	0.162413	6.15715	down	0	RAT10089	0	mRNA	LOC361346	similar to chromosome 18 open reading frame 54	NA	NA	NM_001017462	NA	NA	NA	NA_x000D_
RAT02498	5.46403	P	6.70076	P	0.424334	2.35664	down	0	RAT02498	0	mRNA	NA	NA	NA	NA	TC630882	NA	NA	NA	NA_x000D_
RAT23497	7.00124	P	4.84196	A	4.46694	4.46694	up	0	RAT23497	0	mRNA	Defb15	defensin beta 15	NA	NA	NM_001037520	NA	NA	NA	NA_x000D_
A_44_P895660	6.04268	P	4.18518	A	3.62378	3.62378	up	0	A_44_P895660	0	mRNA	NA	NA	NA	NA	TC643113	NA	NA	NA	NA_x000D_
RAT24396	10.3651	P	12.0744	P	0.30581	3.27001	down	0	RAT24396	0	mRNA	RGD1563217	similar to RIKEN cDNA 4930451I11	NA	NA	NM_001109155	NA	NA	NA	NA_x000D_
RAT02139	9.38211	P	7.69843	P	3.21248	3.21248	up	0	RAT02139	0	mRNA	St6galnac3	"ST6 (alpha-N-acetyl-neuraminyl-2,3-beta-galactosyl-1,3)-N-acetylgalactosaminide alpha-2,6-sialyltransferase 3"	NA	NA	NM_019123	NA	NA	NA	NA_x000D_
RAT06646	8.86484	P	7.21793	P	3.13163	3.13163	up	0	RAT06646	0	mRNA	Slc5a11	"solute carrier family 5 (sodium/glucose cotransporter), member 11"	NA	NA	NM_001100482	NA	NA	NA	NA_x000D_
RAT03097	9.17571	P	10.3661	P	0.438182	2.28216	down	0	RAT03097	0	mRNA	Dcun1d1	"DCN1, defective in cullin neddylation 1, domain containing 1 (S. cerevisiae)"	NA	NA	NM_001107668	NA	NA	NA	NA_x000D_
RAT15761	5.82827	P	7.06463	P	0.42444	2.35604	down	0	RAT15761	0	mRNA	NA	NA	NA	NA	TC591400	NA	NA	NA	NA_x000D_
RAT11551	9.43496	P	8.40307	P	2.0447	2.0447	up	0	RAT11551	0	mRNA	NA	NA	NA	NA	ENSRNOT00000025495	NA	NA	NA	NA_x000D_
RAT28786	5.51852	P	6.66302	P	0.452346	2.2107	down	0	RAT28786	0	mRNA	Gpr142	G protein-coupled receptor 142	NA	NA	ENSRNOT00000035963	NA	NA	NA	NA_x000D_
RAT16861	6.08649	P	4.9042	A	2.26937	2.26937	up	0	RAT16861	0	mRNA	RGD1307465	similar to RIKEN cDNA 8430406I07	NA	NA	NM_001009655	NA	NA	NA	NA_x000D_
RAT27938	5.81386	P	4.70818	A	2.152	2.152	up	0	RAT27938	0	mRNA	RGD1564342	similar to hypothetical protein FLJ32685	NA	NA	ENSRNOT00000030991	NA	NA	NA	NA_x000D_
RAT22298	6.22508	P	5.03191	A	2.28654	2.28654	up	0	RAT22298	0	mRNA	Mrvi1	murine retrovirus integration site 1 homolog	NA	NA	NM_001105210	NA	NA	NA	NA_x000D_
RAT03548	7.38768	P	6.10798	P	2.42789	2.42789	up	0	RAT03548	0	mRNA	Atp6ap2	"ATPase, H+ transporting, lysosomal accessory protein 2"	NA	NA	NM_001007091	NA	NA	NA	NA_x000D_
RAT04392	5.23536	A	6.97884	P	0.298649	3.34842	down	0	RAT04392	0	mRNA	Tmem154	transmembrane protein 154	NA	NA	NM_001108553	NA	NA	NA	NA_x000D_
RAT00065	7.82695	P	9.49624	P	0.314408	3.18058	down	0	RAT00065	0	mRNA	Fam176b	"family with sequence similarity 176, member B"	NA	NA	NM_001108679	NA	NA	NA	NA_x000D_
RAT00795	9.98088	P	7.91095	P	4.19865	4.19865	up	0	RAT00795	0	mRNA	RGD1560925	similar to 2610034M16Rik protein	NA	NA	ENSRNOT00000056434	NA	NA	NA	NA_x000D_
RAT02525	13.251	P	12.2353	P	2.02177	2.02177	up	0	RAT02525	0	mRNA	Glud1	glutamate dehydrogenase 1	NA	NA	NM_012570	NA	NA	NA	NA_x000D_
RAT24711	10.1691	P	12.0818	P	0.265597	3.7651	down	0	RAT24711	0	mRNA	NA	NA	NA	NA	NA	NA	NA	NA	NA_x000D_
RAT11400	6.26064	P	5.2064	A	2.07662	2.07662	up	0	RAT11400	0	mRNA	Cdc42se2	CDC42 small effector 2	NA	NA	NM_001126089	NA	NA	NA	NA_x000D_
RAT27963	7.06803	P	9.87645	P	0.142752	7.00516	down	0	RAT27963	0	mRNA	Ahnak	AHNAK nucleoprotein	NA	NA	NM_001191951	NA	NA	NA	NA_x000D_
RAT15235	9.97711	P	11.101	P	0.458861	2.17931	down	0	RAT15235	0	mRNA	LOC690206	hypothetical protein LOC690206	NA	NA	NM_001109567	NA	NA	NA	NA_x000D_
RAT20712	6.39924	P	4.22414	A	4.51617	4.51617	up	0	RAT20712	0	mRNA	NA	NA	NA	NA	NA	NA	NA	NA	NA_x000D_
RAT27312	5.59735	P	6.9463	P	0.392579	2.54726	down	0	RAT27312	0	mRNA	LOC501234	hypothetical gene supported by BC082068	NA	NA	XM_576655	NA	NA	NA	NA_x000D_
RAT08903	9.99586	P	12.5236	P	0.173415	5.76652	down	0	RAT08903	0	mRNA	Timp1	TIMP metallopeptidase inhibitor 1	NA	NA	NM_053819	NA	NA	NA	NA_x000D_
RAT13499	9.61961	P	10.8425	P	0.428415	2.33418	down	0	RAT13499	0	mRNA	NA	NA	NA	NA	NA	NA	NA	NA	NA_x000D_
RAT29651	6.74041	P	8.20589	P	0.362114	2.76156	down	0	RAT29651	0	mRNA	LOC685226	similar to spermatogenesis associated glutamate (E)-rich protein 4d	NA	NA	ENSRNOT00000045972	NA	NA	NA	NA_x000D_
RAT20881	7.90877	P	9.23108	P	0.399892	2.50067	down	0	RAT20881	0	mRNA	Slco6d1	"solute carrier organic anion transporter family, member 6d1"	NA	NA	NM_001014270	NA	NA	NA	NA_x000D_
RAT20455	16.9949	P	15.807	P	2.27825	2.27825	up	0	RAT20455	0	mRNA	Fth1	"ferritin, heavy polypeptide 1"	NA	NA	NM_012848	NA	NA	NA	NA_x000D_
RAT27440	5.90324	P	9.23573	P	0.0992708	10.0735	down	0	RAT27440	0	mRNA	NA	NA	NA	NA	NA	NA	NA	NA	NA_x000D_
RAT07225	11.1133	P	9.746	P	2.5799	2.5799	up	0	RAT07225	0	mRNA	Aldh1a7	"aldehyde dehydrogenase family 1, subfamily A7"	NA	NA	NM_017272	NA	NA	NA	NA_x000D_
RAT01324	8.12697	P	6.29506	P	3.5601	3.5601	up	0	RAT01324	0	mRNA	Tbc1d9	"TBC1 domain family, member 9"	NA	NA	NM_001134539	NA	NA	NA	NA_x000D_
RAT18675	5.96461	P	4.15227	A	3.51213	3.51213	up	0	RAT18675	0	mRNA	NA	NA	NA	NA	ENSRNOT00000035843	NA	NA	NA	NA_x000D_
RAT00883	8.03859	P	9.79036	P	0.296936	3.36773	down	0	RAT00883	0	mRNA	Prss23	"protease, serine, 23"	NA	NA	NM_001007691	NA	NA	NA	NA_x000D_
RAT08241	8.00717	P	9.1604	P	0.449618	2.22411	down	0	RAT08241	0	mRNA	Spn	sialophorin	NA	NA	ENSRNOT00000055013	NA	NA	NA	NA_x000D_
RAT10482	5.51613	P	4.50267	A	2.01875	2.01875	up	0	RAT10482	0	mRNA	Invs	inversin	NA	NA	NM_001107932	NA	NA	NA	NA_x000D_
RAT07036	7.92952	P	9.60278	P	0.313545	3.18933	down	0	RAT07036	0	mRNA	LOC501089	similar to Discs large homolog 5 (Placenta and prostate DLG) (Discs large protein P-dlg)	NA	NA	XM_576504	NA	NA	NA	NA_x000D_
RAT05011	13.3908	P	15.1692	P	0.291511	3.4304	down	0	RAT05011	0	mRNA	Apoe	apolipoprotein E	NA	NA	NM_138828	NA	NA	NA	NA_x000D_
RAT25769	11.1158	P	9.61441	P	2.83114	2.83114	up	0	RAT25769	0	mRNA	Snx25	sorting nexin 25	NA	NA	XM_001061047	NA	NA	NA	NA_x000D_
RAT00718	10.1888	P	8.96227	P	2.34002	2.34002	up	0	RAT00718	0	mRNA	Slc31a2	"solute carrier family 31 (copper transporters), member 2"	NA	NA	NM_001033693	NA	NA	NA	NA_x000D_
RAT27460	5.72609	P	4.4486	A	2.42417	2.42417	up	0	RAT27460	0	mRNA	NA	NA	NA	NA	NA	NA	NA	NA	NA_x000D_
RAT19005	2.93089	A	6.80648	P	0.0681286	14.6781	down	0	RAT19005	0	mRNA	Chst4	carbohydrate (N-acetylglucosamine 6-O) sulfotransferase 4	NA	NA	NM_001107427	NA	NA	NA	NA_x000D_
RAT04665	8.12942	P	7.10863	P	2.02904	2.02904	up	0	RAT04665	0	mRNA	Blnk	B-cell linker	NA	NA	NM_001025767	NA	NA	NA	NA_x000D_
RAT05827	9.30406	P	10.5112	P	0.433141	2.30872	down	0	RAT05827	0	mRNA	Mras	muscle RAS oncogene homolog	NA	NA	NM_012981	NA	NA	NA	NA_x000D_
RAT13666	5.05105	A	7.14158	P	0.234793	4.25906	down	0	RAT13666	0	mRNA	Speg	SPEG complex locus	NA	NA	NM_001108802	NA	NA	NA	NA_x000D_
RAT28422	13.0328	P	14.1437	P	0.46301	2.15978	down	0	RAT28422	0	mRNA	NA	NA	NA	NA	NA	NA	NA	NA	NA_x000D_
RAT02516	12.0346	P	10.9861	P	2.06833	2.06833	up	0	RAT02516	0	mRNA	Btg1	"B-cell translocation gene 1, anti-proliferative"	NA	NA	NM_017258	NA	NA	NA	NA_x000D_
RAT10859	11.5399	P	13.9678	P	0.185848	5.38075	down	0	RAT10859	0	mRNA	Dtnbp1	distrobrevin binding protein 1	NA	NA	NM_001037664	NA	NA	NA	NA_x000D_
RAT22111	9.36982	P	10.7888	P	0.373981	2.67394	down	0	RAT22111	0	mRNA	Olr836	olfactory receptor 836	NA	NA	NM_001000406	NA	NA	NA	NA_x000D_
RAT13213	4.98877	A	6.30593	P	0.401325	2.49174	down	0	RAT13213	0	mRNA	NA	NA	NA	NA	NA	NA	NA	NA	NA_x000D_
RAT09402	4.05105	A	6.56852	P	0.174649	5.72577	down	0	RAT09402	0	mRNA	Ntf3	neurotrophin 3	NA	NA	NM_031073	NA	NA	NA	NA_x000D_
RAT29808	5.76916	P	4.35511	A	2.66485	2.66485	up	0	RAT29808	0	mRNA	NA	NA	NA	NA	ENSRNOT00000032698	NA	NA	NA	NA_x000D_
RAT10560	5.40604	P	3.15558	A	4.75833	4.75833	up	0	RAT10560	0	mRNA	Gpr155	G protein-coupled receptor 155	NA	NA	NM_001107811	NA	NA	NA	NA_x000D_
RAT01580	6.03512	P	8.24004	P	0.216897	4.61049	down	0	RAT01580	0	mRNA	Slc6a8	"solute carrier family 6 (neurotransmitter transporter, creatine), member 8"	NA	NA	NM_017348	NA	NA	NA	NA_x000D_
RAT09882	8.56611	P	7.16008	P	2.65006	2.65006	up	0	RAT09882	0	mRNA	Plcg2	"phospholipase C, gamma 2"	NA	NA	NM_017168	NA	NA	NA	NA_x000D_
RAT07420	5.45826	P	7.22738	P	0.293388	3.40846	down	0	RAT07420	0	mRNA	LOC654482	hypothetical protein LOC654482	NA	NA	NM_001039174	NA	NA	NA	NA_x000D_
RAT05103	7.68152	P	2.88471	A	27.796	27.796	up	0	RAT05103	0	mRNA	Ccl21	chemokine (C-C motif) ligand 21	NA	NA	NM_001008513	NA	NA	NA	NA_x000D_
RAT12757	7.6666	P	9.63716	P	0.255154	3.91921	down	0	RAT12757	0	mRNA	Slc22a18	"solute carrier family 22, member 18"	NA	NA	NM_001004260	NA	NA	NA	NA_x000D_
RAT18791	4.1171	A	5.59085	P	0.360047	2.77742	down	0	RAT18791	0	mRNA	Amph	amphiphysin	NA	NA	NM_022217	NA	NA	NA	NA_x000D_
RAT06975	5.80595	P	7.86512	P	0.239954	4.16747	down	0	RAT06975	0	mRNA	Aldh1a2	"aldehyde dehydrogenase 1 family, member A2"	NA	NA	NM_053896	NA	NA	NA	NA_x000D_
RAT26607	5.9291	P	7.07149	P	0.453008	2.20747	down	0	RAT26607	0	mRNA	Gpr39	G protein-coupled receptor 39	NA	NA	NM_001100943	NA	NA	NA	NA_x000D_
RAT20565	5.27008	P	3.96286	A	2.47465	2.47465	up	0	RAT20565	0	mRNA	Zfp800	zinc finger protein 800	NA	NA	NM_001109225	NA	NA	NA	NA_x000D_
RAT27257	10.2272	P	11.4749	P	0.421132	2.37455	down	0	RAT27257	0	mRNA	Iqcf3	IQ motif containing F3	NA	NA	NM_001025153	NA	NA	NA	NA_x000D_
RAT00634	9.36168	P	7.9827	P	2.60085	2.60085	up	0	RAT00634	0	mRNA	Pfn2	profilin 2	NA	NA	NM_030873	NA	NA	NA	NA_x000D_
RAT19408	7.32878	P	8.37577	P	0.483976	2.06622	down	0	RAT19408	0	mRNA	Ccdc3	coiled-coil domain containing 3	NA	NA	XM_001071191	NA	NA	NA	NA_x000D_
RAT10389	9.20979	P	7.51779	P	3.23103	3.23103	up	0	RAT10389	0	mRNA	LOC679126	similar to SMAD-interacting zinc finger protein 2	NA	NA	XM_001054555	NA	NA	NA	NA_x000D_
RAT12917	7.88507	P	9.00053	P	0.461543	2.16665	down	0	RAT12917	0	mRNA	Ccdc27	coiled-coil domain containing 27	NA	NA	NM_001191063	NA	NA	NA	NA_x000D_
RAT07009	5.43671	P	3.85962	A	2.98368	2.98368	up	0	RAT07009	0	mRNA	LOC691543	hypothetical protein LOC691543	NA	NA	NM_001109645	NA	NA	NA	NA_x000D_
RAT07171	8.23057	P	10.6553	P	0.186244	5.36931	down	0	RAT07171	0	mRNA	C2	complement component 2	NA	NA	NM_172222	NA	NA	NA	NA_x000D_
RAT21119	7.63992	P	9.1221	P	0.357949	2.7937	down	0	RAT21119	0	mRNA	NA	NA	NA	NA	ENSRNOT00000038077	NA	NA	NA	NA_x000D_
RAT06466	4.38193	A	5.62861	P	0.421419	2.37293	down	0	RAT06466	0	mRNA	Clec11a	"C-type lectin domain family 11, member A"	NA	NA	NM_001012459	NA	NA	NA	NA_x000D_
RAT00238	7.41255	P	5.93005	P	2.79433	2.79433	up	0	RAT00238	0	mRNA	RGD1305347	similar to RIKEN cDNA 2610528J11	NA	NA	NM_001108674	NA	NA	NA	NA_x000D_
RAT05701	9.12542	P	8.11184	P	2.01892	2.01892	up	0	RAT05701	0	mRNA	Cacybp	calcyclin binding protein	NA	NA	NM_001004208	NA	NA	NA	NA_x000D_
RAT20649	4.37549	A	5.80595	P	0.371012	2.69533	down	0	RAT20649	0	mRNA	RGD1566296	similar to RIKEN cDNA B230114P05	NA	NA	ENSRNOT00000049308	NA	NA	NA	NA_x000D_
RAT01169	8.68177	P	9.85239	P	0.444231	2.25108	down	0	RAT01169	0	mRNA	Sdc4	syndecan 4	NA	NA	NM_012649	NA	NA	NA	NA_x000D_
RAT00485	7.83764	P	6.41887	P	2.67359	2.67359	up	0	RAT00485	0	mRNA	Sorl1	"sortilin-related receptor, LDLR class A repeats-containing"	NA	NA	NM_053519	NA	NA	NA	NA_x000D_
RAT06578	3.60839	A	5.40165	P	0.288519	3.46598	down	0	RAT06578	0	mRNA	Dsel	dermatan sulfate epimerase-like	NA	NA	ENSRNOT00000043890	NA	NA	NA	NA_x000D_
RAT26945	6.0879	P	4.36998	A	3.28962	3.28962	up	0	RAT26945	0	mRNA	Col7a1	"procollagen, type VII, alpha 1"	NA	NA	NM_001106858	NA	NA	NA	NA_x000D_
RAT17758	5.74534	P	4.39299	A	2.55329	2.55329	up	0	RAT17758	0	mRNA	NA	NA	NA	NA	NA	NA	NA	NA	NA_x000D_
RAT00758	10.6258	P	13.0519	P	0.186073	5.37425	down	0	RAT00758	0	mRNA	Spock2	"sparc/osteonectin, cwcv and kazal-like domains proteoglycan 2"	NA	NA	NM_001108533	NA	NA	NA	NA_x000D_
RAT27647	7.63346	P	9.22646	P	0.331481	3.01677	down	0	RAT27647	0	mRNA	Cdyl2	"chromodomain protein, Y chromosome-like 2"	NA	NA	NM_001106189	NA	NA	NA	NA_x000D_
RAT17578	4.74863	A	6.83871	P	0.234868	4.2577	down	0	RAT17578	0	mRNA	Sned1	"sushi, nidogen and EGF-like domains 1"	NA	NA	NM_001167842	NA	NA	NA	NA_x000D_
RAT19136	7.79023	P	6.29283	P	2.82334	2.82334	up	0	RAT19136	0	mRNA	NA	NA	NA	NA	ENSRNOT00000058384	NA	NA	NA	NA_x000D_
RAT20195	10.7937	P	12.0227	P	0.426625	2.34398	down	0	RAT20195	0	mRNA	NA	NA	NA	NA	NA	NA	NA	NA	NA_x000D_
RAT29032	8.04649	P	6.96853	P	2.11105	2.11105	up	0	RAT29032	0	mRNA	Rspry1	ring finger and SPRY domain containing 1	NA	NA	NM_001100945	NA	NA	NA	NA_x000D_
RAT02867	7.80806	P	9.98707	P	0.220827	4.52842	down	0	RAT02867	0	mRNA	Igfbp4	insulin-like growth factor binding protein 4	NA	NA	NM_001004274	NA	NA	NA	NA_x000D_
RAT09505	4.94227	A	6.44818	P	0.352109	2.84003	down	0	RAT09505	0	mRNA	Kctd19	potassium channel tetramerisation domain containing 19	NA	NA	ENSRNOT00000022497	NA	NA	NA	NA_x000D_
RAT09226	4.62468	A	6.09696	P	0.360412	2.7746	down	0	RAT09226	0	mRNA	Fhl1	four and a half LIM domains 1	NA	NA	NM_145669	NA	NA	NA	NA_x000D_
RAT24730	5.36066	P	6.57744	P	0.430242	2.32427	down	0	RAT24730	0	mRNA	NA	NA	NA	NA	ENSRNOT00000049155	NA	NA	NA	NA_x000D_
RAT04762	7.95729	P	9.91451	P	0.257525	3.88311	down	0	RAT04762	0	mRNA	Spock2	"sparc/osteonectin, cwcv and kazal-like domains proteoglycan 2"	NA	NA	NM_001108533	NA	NA	NA	NA_x000D_
RAT25402	8.56737	P	7.48138	P	2.12284	2.12284	up	0	RAT25402	0	mRNA	Bsdc1	BSD domain containing 1	NA	NA	NM_001106636	NA	NA	NA	NA_x000D_
RAT25676	8.02556	P	9.047	P	0.492625	2.02994	down	0	RAT25676	0	mRNA	LOC367515	similar to RIKEN cDNA 1700081O22	NA	NA	NM_001014271	NA	NA	NA	NA_x000D_
RAT01126	7.03252	P	5.94417	P	2.12631	2.12631	up	0	RAT01126	0	mRNA	Ttc30b	tetratricopeptide repeat domain 30B	NA	NA	NM_001127607	NA	NA	NA	NA_x000D_
RAT04714	8.68292	P	10.6066	P	0.263577	3.79396	down	0	RAT04714	0	mRNA	Zbtb48	zinc finger and BTB domain containing 48	NA	NA	NM_001013216	NA	NA	NA	NA_x000D_
RAT25259	12.2031	P	11.0545	P	2.21695	2.21695	up	0	RAT25259	0	mRNA	Tmed2	transmembrane emp24 domain trafficking protein 2	NA	NA	NM_031722	NA	NA	NA	NA_x000D_
RAT29474	10.27	P	12.1982	P	0.262768	3.80564	down	0	RAT29474	0	mRNA	Krtap1-3	keratin associated protein 1-3	NA	NA	ENSRNOT00000037980	NA	NA	NA	NA_x000D_
RAT00020	5.84962	P	4.43743	A	2.6614	2.6614	up	0	RAT00020	0	mRNA	Supv3l1	"suppressor of var1, 3-like 1 (S. cerevisiae)"	NA	NA	NM_001012462	NA	NA	NA	NA_x000D_
RAT19082	8.47062	P	9.50699	P	0.487553	2.05106	down	0	RAT19082	0	mRNA	Icam5	"intercellular adhesion molecule 5, telencephalin"	NA	NA	NM_001172079	NA	NA	NA	NA_x000D_
RAT04943	4.04933	A	6.28743	P	0.211966	4.71773	down	0	RAT04943	0	mRNA	Adh7	"alcohol dehydrogenase 7 (class IV), mu or sigma polypeptide"	NA	NA	NM_134329	NA	NA	NA	NA_x000D_
RAT00122	6.3678	P	7.97485	P	0.32827	3.04627	down	0	RAT00122	0	mRNA	Fhl1	four and a half LIM domains 1	NA	NA	NM_001033926	NA	NA	NA	NA_x000D_
RAT08988	5.11697	A	6.15898	P	0.485653	2.05908	down	0	RAT08988	0	mRNA	Angptl2	angiopoietin-like 2	NA	NA	NM_133569	NA	NA	NA	NA_x000D_
RAT09796	7.68518	P	6.55747	P	2.18511	2.18511	up	0	RAT09796	0	mRNA	NA	NA	NA	NA	XM_344922	NA	NA	NA	NA_x000D_
RAT18294	6.38164	P	7.68996	P	0.403791	2.47653	down	0	RAT18294	0	mRNA	Stx2	syntaxin 2	NA	NA	NM_012748	NA	NA	NA	NA_x000D_
RAT03066	4.52499	A	5.83347	P	0.403746	2.4768	down	0	RAT03066	0	mRNA	Gfpt2	glutamine-fructose-6-phosphate transaminase 2	NA	NA	NM_001002819	NA	NA	NA	NA_x000D_
RAT26616	5.88301	P	4.3751	A	2.84398	2.84398	up	0	RAT26616	0	mRNA	NA	NA	NA	NA	NA	NA	NA	NA	NA_x000D_
RAT09764	5.95814	P	4.93637	A	2.03041	2.03041	up	0	RAT09764	0	mRNA	Cyp2r1	"cytochrome P450, family 2, subfamily r, polypeptide 1"	NA	NA	NM_001108499	NA	NA	NA	NA_x000D_
RAT15302	7.26585	P	8.29878	P	0.488718	2.04617	down	0	RAT15302	0	mRNA	RGD1561560	similar to Gpd1l protein	NA	NA	ENSRNOT00000032728	NA	NA	NA	NA_x000D_
RAT24867	3.51867	A	5.7833	P	0.208103	4.80532	down	0	RAT24867	0	mRNA	Tll2	tolloid-like 2	NA	NA	NM_001191898	NA	NA	NA	NA_x000D_
RAT08549	7.81562	P	6.57465	P	2.36358	2.36358	up	0	RAT08549	0	mRNA	Pemt	phosphatidylethanolamine N-methyltransferase	NA	NA	NM_013003	NA	NA	NA	NA_x000D_
RAT03034	4.65527	A	6.12267	P	0.361633	2.76523	down	0	RAT03034	0	mRNA	RGD1562533	similar to mKIAA0774 protein	NA	NA	NM_001100989	NA	NA	NA	NA_x000D_
RAT17418	10.4149	P	11.7183	P	0.405151	2.46822	down	0	RAT17418	0	mRNA	Spata18	spermatogenesis associated 18	NA	NA	NM_199374	NA	NA	NA	NA_x000D_
RAT01345	7.63363	P	5.62892	P	4.01307	4.01307	up	0	RAT01345	0	mRNA	Adck1	aarF domain containing kinase 1	NA	NA	NM_001108985	NA	NA	NA	NA_x000D_
RAT03438	7.03157	P	5.80285	P	2.34358	2.34358	up	0	RAT03438	0	mRNA	Slc22a5	"solute carrier family 22 (organic cation/carnitine transporter), member 5"	NA	NA	NM_019269	NA	NA	NA	NA_x000D_
RAT08685	5.93018	P	4.27237	A	3.15537	3.15537	up	0	RAT08685	0	mRNA	Pex7	peroxisomal biogenesis factor 7	NA	NA	NM_001034147	NA	NA	NA	NA_x000D_
RAT06064	6.82324	P	9.03982	P	0.21515	4.64793	down	0	RAT06064	0	mRNA	Cxcr7	chemokine (C-X-C motif) receptor 7	NA	NA	NM_053352	NA	NA	NA	NA_x000D_
RAT07674	9.60133	P	8.55072	P	2.0714	2.0714	up	0	RAT07674	0	mRNA	Gstk1	glutathione S-transferase kappa 1	NA	NA	NM_181371	NA	NA	NA	NA_x000D_
RAT11699	9.95957	P	11.1782	P	0.429681	2.32731	down	0	RAT11699	0	mRNA	NA	NA	NA	NA	NA	NA	NA	NA	NA_x000D_
RAT20578	12.2812	P	11.2438	P	2.05254	2.05254	up	0	RAT20578	0	mRNA	Gpr64	G protein-coupled receptor 64	NA	NA	NM_181366	NA	NA	NA	NA_x000D_
RAT18783	7.85995	P	9.72816	P	0.273912	3.65081	down	0	RAT18783	0	mRNA	Shank3	SH3 and multiple ankyrin repeat domains 3	NA	NA	NM_021676	NA	NA	NA	NA_x000D_
RAT26706	8.51216	P	6.99257	P	2.86708	2.86708	up	0	RAT26706	0	mRNA	NA	NA	NA	NA	NA	NA	NA	NA	NA_x000D_
RAT15201	4.69538	A	6.19717	P	0.353116	2.83193	down	0	RAT15201	0	mRNA	Hrh2	histamine receptor H 2	NA	NA	NM_012965	NA	NA	NA	NA_x000D_
RAT04953	8.5492	P	9.7611	P	0.431699	2.31643	down	0	RAT04953	0	mRNA	Rangap1	RAN GTPase activating protein 1	NA	NA	NM_001244855	NA	NA	NA	NA_x000D_
RAT08819	11.2709	P	13.3355	P	0.239051	4.18321	down	0	RAT08819	0	mRNA	RGD1564776	similar to ornithine decarboxylase-like protein	NA	NA	NM_001014261	NA	NA	NA	NA_x000D_
RAT24998	4.4661	A	5.68946	P	0.428284	2.3349	down	0	RAT24998	0	mRNA	Kif6	kinesin family member 6	NA	NA	ENSRNOT00000015584	NA	NA	NA	NA_x000D_
RAT05675	5.24584	A	6.43392	P	0.438887	2.27849	down	0	RAT05675	0	mRNA	RGD1310384	hypothetical LOC289530	NA	NA	XM_001064794	NA	NA	NA	NA_x000D_
RAT13554	6.31985	P	7.81601	P	0.354496	2.82091	down	0	RAT13554	0	mRNA	LOC689618	similar to Protein C20orf85 homolog	NA	NA	NM_001109542	NA	NA	NA	NA_x000D_
RAT20505	6.5722	P	7.8204	P	0.420972	2.37545	down	0	RAT20505	0	mRNA	LOC685408	Sperm motility kinase Y-like	NA	NA	XM_002728904	NA	NA	NA	NA_x000D_
RAT14339	8.67754	P	10.0063	P	0.398114	2.51184	down	0	RAT14339	0	mRNA	LOC367515	similar to RIKEN cDNA 1700081O22	NA	NA	NM_001014271	NA	NA	NA	NA_x000D_
RAT17041	5.62332	P	8.48586	P	0.137496	7.27294	down	0	RAT17041	0	mRNA	NA	NA	NA	NA	NA	NA	NA	NA	NA_x000D_
RAT04223	6.72734	P	7.99782	P	0.414522	2.41242	down	0	RAT04223	0	mRNA	NA	NA	NA	NA	ENSRNOT00000032512	NA	NA	NA	NA_x000D_
RAT10313	8.14075	P	6.69398	P	2.72596	2.72596	up	0	RAT10313	0	mRNA	Ankmy2	ankyrin repeat and MYND domain containing 2	NA	NA	NM_001108019	NA	NA	NA	NA_x000D_
RAT08616	7.66352	P	9.23525	P	0.336405	2.9726	down	0	RAT08616	0	mRNA	Lhfp	lipoma HMGIC fusion partner	NA	NA	NM_001109183	NA	NA	NA	NA_x000D_
RAT09917	7.60642	P	6.07785	P	2.88499	2.88499	up	0	RAT09917	0	mRNA	Acbd3	acyl-CoA binding domain containing 3	NA	NA	NM_182843	NA	NA	NA	NA_x000D_
RAT16451	8.57974	P	7.48082	P	2.14194	2.14194	up	0	RAT16451	0	mRNA	Tars	threonyl-tRNA synthetase	NA	NA	NM_001006976	NA	NA	NA	NA_x000D_
RAT01857	7.24178	P	6.19617	P	2.06425	2.06425	up	0	RAT01857	0	mRNA	NA	NA	NA	NA	DV720985	NA	NA	NA	NA_x000D_
RAT15390	7.89954	P	9.81908	P	0.264339	3.78302	down	0	RAT15390	0	mRNA	NA	NA	NA	NA	NA	NA	NA	NA	NA_x000D_
RAT12888	5.47043	P	4.39503	A	2.1073	2.1073	up	0	RAT12888	0	mRNA	RGD1559762	similar to RIKEN cDNA 4933436I01	NA	NA	XM_002725650	NA	NA	NA	NA_x000D_
RAT22806	11.8495	P	13.07	P	0.429132	2.33028	down	0	RAT22806	0	mRNA	NA	NA	NA	NA	ENSRNOT00000018401	NA	NA	NA	NA_x000D_
RAT01547	9.7782	P	8.28545	P	2.81424	2.81424	up	0	RAT01547	0	mRNA	Cyfip2	cytoplasmic FMR1 interacting protein 2	NA	NA	NM_001106996	NA	NA	NA	NA_x000D_
RAT01887	7.83505	P	6.7613	P	2.1049	2.1049	up	0	RAT01887	0	mRNA	MGC94335	similar to hypothetical protein FLJ22555	NA	NA	NM_001004251	NA	NA	NA	NA_x000D_
RAT04199	5.87589	P	4.19935	A	3.19662	3.19662	up	0	RAT04199	0	mRNA	LOC367050	similar to 60S ribosomal protein L35	NA	NA	ENSRNOT00000051023	NA	NA	NA	NA_x000D_
RAT11799	6.0626	P	4.86925	A	2.28684	2.28684	up	0	RAT11799	0	mRNA	LOC686785	"similar to N-acetyltransferase, homolog of S. cerevisiae ARD1"	NA	NA	XR_009033	NA	NA	NA	NA_x000D_
RAT20311	8.46822	P	10.016	P	0.342027	2.92374	down	0	RAT20311	0	mRNA	NA	NA	NA	NA	NA	NA	NA	NA	NA_x000D_
RAT22458	10.6305	P	12.0201	P	0.381677	2.62001	down	0	RAT22458	0	mRNA	RGD1564428	similar to FLJ32921 protein	NA	NA	NM_001109125	NA	NA	NA	NA_x000D_
RAT04720	11.6319	P	10.4575	P	2.25708	2.25708	up	0	RAT04720	0	mRNA	Pdia6	"protein disulfide isomerase family A, member 6"	NA	NA	NM_001004442	NA	NA	NA	NA_x000D_
RAT10813	9.95309	P	11.2783	P	0.39909	2.5057	down	0	RAT10813	0	mRNA	Bmp1	bone morphogenetic protein 1	NA	NA	NM_031323	NA	NA	NA	NA_x000D_
RAT24415	6.99733	P	8.21943	P	0.428659	2.33286	down	0	RAT24415	0	mRNA	RGD1559683	similar to RIKEN cDNA 1700001C02	NA	NA	NM_001109275	NA	NA	NA	NA_x000D_
RAT23344	6.69768	P	9.55512	P	0.137983	7.24728	down	0	RAT23344	0	mRNA	NA	NA	NA	NA	NA	NA	NA	NA	NA_x000D_
RAT20414	5.90419	P	4.47065	A	2.70108	2.70108	up	0	RAT20414	0	mRNA	Mob1b	MOB kinase activator 1B	NA	NA	NM_001108357	NA	NA	NA	NA_x000D_
RAT27301	5.12311	A	6.36129	P	0.423904	2.35902	down	0	RAT27301	0	mRNA	Plekhg5	"pleckstrin homology domain containing, family G (with RhoGef domain) member 5"	NA	NA	NM_201272	NA	NA	NA	NA_x000D_
RAT29072	9.50567	P	7.67058	P	3.56795	3.56795	up	0	RAT29072	0	mRNA	RGD1562101	similar to very large G-protein coupled receptor 1	NA	NA	ENSRNOT00000039652	NA	NA	NA	NA_x000D_
RAT28342	6.25316	P	7.52332	P	0.414615	2.41188	down	0	RAT28342	0	mRNA	Scel	sciellin	NA	NA	NM_001108388	NA	NA	NA	NA_x000D_
RAT27835	6.62436	P	8.19379	P	0.33694	2.96789	down	0	RAT27835	0	mRNA	NA	NA	NA	NA	ENSRNOT00000043494	NA	NA	NA	NA_x000D_
RAT20680	8.13189	P	10.4109	P	0.206033	4.8536	down	0	RAT20680	0	mRNA	LOC304239	similar to RalA binding protein 1	NA	NA	ENSRNOT00000049215	NA	NA	NA	NA_x000D_
RAT16656	13.4781	P	14.6634	P	0.439746	2.27404	down	0	RAT16656	0	mRNA	Tceb2	"transcription elongation factor B (SIII), polypeptide 2"	NA	NA	NM_031129	NA	NA	NA	NA_x000D_
RAT01844	10.0561	P	8.51697	P	2.90627	2.90627	up	0	RAT01844	0	mRNA	RGD1304644	similar to RIKEN cDNA 2310046K01	NA	NA	NM_001037198	NA	NA	NA	NA_x000D_
RAT00161	10.4461	P	11.6967	P	0.420256	2.3795	down	0	RAT00161	0	mRNA	Sulf2	sulfatase 2	NA	NA	NM_001034927	NA	NA	NA	NA_x000D_
RAT08425	6.98267	P	9.06053	P	0.236866	4.2218	down	0	RAT08425	0	mRNA	Sik1	salt-inducible kinase 1	NA	NA	ENSRNOT00000001579	NA	NA	NA	NA_x000D_
RAT01882	7.35227	P	8.8702	P	0.349187	2.86379	down	0	RAT01882	0	mRNA	Rgma	"RGM domain family, member A"	NA	NA	NM_001107524	NA	NA	NA	NA_x000D_
RAT03981	8.47581	P	9.52772	P	0.48233	2.07327	down	0	RAT03981	0	mRNA	Mtfr1	mitochondrial fission regulator 1	NA	NA	FQ217237	NA	NA	NA	NA_x000D_
RAT05026	6.09853	P	9.1279	P	0.122481	8.16455	down	0	RAT05026	0	mRNA	Nrxn2	neurexin 2	NA	NA	NM_053846	NA	NA	NA	NA_x000D_
RAT13192	5.27094	A	6.39163	P	0.459874	2.17451	down	0	RAT13192	0	mRNA	Stxbp6	syntaxin binding protein 6 (amisyn)	NA	NA	NM_001191872	NA	NA	NA	NA_x000D_
RAT19826	8.7726	P	10.13	P	0.39028	2.56226	down	0	RAT19826	0	mRNA	NA	NA	NA	NA	ENSRNOT00000056621	NA	NA	NA	NA_x000D_
RAT09471	5.26949	A	6.68706	P	0.374343	2.67135	down	0	RAT09471	0	mRNA	Armc4	armadillo repeat containing 4	NA	NA	XM_225474	NA	NA	NA	NA_x000D_
RAT12706	5.11442	A	6.21712	P	0.465646	2.14755	down	0	RAT12706	0	mRNA	MGC114492	"similar to melanoma antigen family A, 5"	NA	NA	NM_001024895	NA	NA	NA	NA_x000D_
RAT21069	7.98591	P	6.891	P	2.136	2.136	up	0	RAT21069	0	mRNA	Yipf4	"Yip1 domain family, member 4"	NA	NA	NM_001009712	NA	NA	NA	NA_x000D_
RAT11063	8.13762	P	7.09468	P	2.06042	2.06042	up	0	RAT11063	0	mRNA	Acpl2	acid phosphatase-like 2	NA	NA	NM_001007710	NA	NA	NA	NA_x000D_
RAT03359	10.619	P	11.9531	P	0.396636	2.5212	down	0	RAT03359	0	mRNA	Cabyr	calcium binding tyrosine-(Y)-phosphorylation regulated	NA	NA	NM_001143893	NA	NA	NA	NA_x000D_
RAT00942	7.72627	P	6.31362	P	2.66225	2.66225	up	0	RAT00942	0	mRNA	Il1a	interleukin 1 alpha	NA	NA	NM_017019	NA	NA	NA	NA_x000D_
RAT22315	9.68889	P	10.9384	P	0.420599	2.37756	down	0	RAT22315	0	mRNA	NA	NA	NA	NA	NA	NA	NA	NA	NA_x000D_
RAT21172	7.6681	P	9.55588	P	0.270224	3.70063	down	0	RAT21172	0	mRNA	NA	NA	NA	NA	NA	NA	NA	NA	NA_x000D_
RAT07706	5.06939	A	7.80788	P	0.149842	6.67371	down	0	RAT07706	0	mRNA	Lrrc61	leucine rich repeat containing 61	NA	NA	NM_001109231	NA	NA	NA	NA_x000D_
RAT26606	9.78211	P	7.89268	P	3.70488	3.70488	up	0	RAT26606	0	mRNA	Wfdc6b	WAP four-disulfide core domain 6B	NA	NA	NM_001008867	NA	NA	NA	NA_x000D_
RAT10027	4.59937	A	7.21965	P	0.162636	6.1487	down	0	RAT10027	0	mRNA	Procr	"protein C receptor, endothelial"	NA	NA	NM_001025733	NA	NA	NA	NA_x000D_
RAT00203	7.74362	P	8.7488	P	0.498206	2.0072	down	0	RAT00203	0	mRNA	Apoc1	apolipoprotein C-I	NA	NA	NM_012824	NA	NA	NA	NA_x000D_
RAT26026	4.40531	A	5.56099	P	0.448854	2.2279	down	0	RAT26026	0	mRNA	NA	NA	NA	NA	NA	NA	NA	NA	NA_x000D_
RAT20729	8.58538	P	10.4739	P	0.270085	3.70254	down	0	RAT20729	0	mRNA	LOC686921	hypothetical protein LOC686921	NA	NA	XM_001076338	NA	NA	NA	NA_x000D_
RAT18211	8.49837	P	9.61211	P	0.462093	2.16407	down	0	RAT18211	0	mRNA	Adh1	alcohol dehydrogenase 1 (class I)	NA	NA	NM_019286	NA	NA	NA	NA_x000D_
RAT03862	4.56348	A	7.17002	P	0.164192	6.09043	down	0	RAT03862	0	mRNA	Adora2a	adenosine A2a receptor	NA	NA	NM_053294	NA	NA	NA	NA_x000D_
RAT13069	5.65896	P	7.21219	P	0.340745	2.93474	down	0	RAT13069	0	mRNA	NA	NA	NA	NA	ENSRNOT00000038605	NA	NA	NA	NA_x000D_
RAT10890	7.66507	P	6.55618	P	2.15679	2.15679	up	0	RAT10890	0	mRNA	Rnf152	ring finger protein 152	NA	NA	NM_001106305	NA	NA	NA	NA_x000D_
RAT23510	8.51395	P	7.12092	P	2.62631	2.62631	up	0	RAT23510	0	mRNA	Spag5	sperm associated antigen 5	NA	NA	NM_001044224	NA	NA	NA	NA_x000D_
RAT21042	5.45776	P	4.16856	A	2.44394	2.44394	up	0	RAT21042	0	mRNA	NA	NA	NA	NA	ENSRNOT00000024645	NA	NA	NA	NA_x000D_
RAT09989	7.71233	P	8.78839	P	0.474322	2.10827	down	0	RAT09989	0	mRNA	Cetn4	centrin 4	NA	NA	ENSRNOT00000065384	NA	NA	NA	NA_x000D_
RAT20291	7.89249	P	8.97645	P	0.471732	2.11985	down	0	RAT20291	0	mRNA	Rundc1	RUN domain containing 1	NA	NA	ENSRNOT00000031208	NA	NA	NA	NA_x000D_
RAT22388	6.93652	P	5.53432	P	2.64304	2.64304	up	0	RAT22388	0	mRNA	Plch1	"phospholipase C, eta 1"	NA	NA	FQ211591	NA	NA	NA	NA_x000D_
RAT22643	13.411	P	14.5284	P	0.460932	2.16952	down	0	RAT22643	0	mRNA	NA	NA	NA	NA	NA	NA	NA	NA	NA_x000D_
RAT00561	8.33628	P	10.4371	P	0.233133	4.2894	down	0	RAT00561	0	mRNA	B4galt5	"UDP-Gal:betaGlcNAc beta 1,4-galactosyltransferase, polypeptide 5"	NA	NA	NM_001108608	NA	NA	NA	NA_x000D_
RAT20764	5.68831	P	2.71511	A	7.85277	7.85277	up	0	RAT20764	0	mRNA	Olr1641	olfactory receptor 1641	NA	NA	NM_001000100	NA	NA	NA	NA_x000D_
RAT25236	10.1441	P	11.717	P	0.33614	2.97496	down	0	RAT25236	0	mRNA	Hils1	"histone linker H1 domain, spermatid-specific 1"	NA	NA	NM_001109565	NA	NA	NA	NA_x000D_
RAT16568	3.16926	A	5.56595	P	0.1899	5.26593	down	0	RAT16568	0	mRNA	Adamtsl1	ADAMTS-like 1	NA	NA	ENSRNOT00000058520	NA	NA	NA	NA_x000D_
RAT03075	9.63716	P	11.2525	P	0.326387	3.06385	down	0	RAT03075	0	mRNA	NA	NA	NA	NA	ENSRNOT00000014537	NA	NA	NA	NA_x000D_
RAT24173	4.93566	A	5.98726	P	0.482434	2.07282	down	0	RAT24173	0	mRNA	NA	NA	NA	NA	NA	NA	NA	NA	NA_x000D_
RAT12093	5.4072	P	3.79971	A	3.04721	3.04721	up	0	RAT12093	0	mRNA	RGD1305627	hypothetical LOC314467	NA	NA	NM_001134560	NA	NA	NA	NA_x000D_
RAT01098	5.85673	P	8.75993	P	0.133675	7.48083	down	0	RAT01098	0	mRNA	Ccl19	chemokine (C-C motif) ligand 19	NA	NA	NM_001108661	NA	NA	NA	NA_x000D_
RAT15822	6.44083	P	4.23065	A	4.62732	4.62732	up	0	RAT15822	0	mRNA	Atp2b3	"ATPase, Ca++ transporting, plasma membrane 3"	NA	NA	NM_133288	NA	NA	NA	NA_x000D_
RAT15922	12.2186	P	10.838	P	2.60368	2.60368	up	0	RAT15922	0	mRNA	NA	NA	NA	NA	NA	NA	NA	NA	NA_x000D_
RAT15119	12.1556	P	15.0428	P	0.135169	7.39813	down	0	RAT15119	0	mRNA	Cfb	complement factor B	NA	NA	NM_212466	NA	NA	NA	NA_x000D_
A_44_P1047638	7.66676	P	6.25059	P	2.66875	2.66875	up	0	A_44_P1047638	0	mRNA	Ndfip2	Nedd4 family interacting protein 2	NA	NA	NM_001108390	NA	NA	NA	NA_x000D_
RAT27667	10.299	P	9.17598	P	2.17799	2.17799	up	0	RAT27667	0	mRNA	Gcom1	GRINL1A complex locus 1	NA	NA	NM_001014211	NA	NA	NA	NA_x000D_
RAT11646	7.00418	P	8.15279	P	0.45106	2.217	down	0	RAT11646	0	mRNA	Smok2a	sperm motility kinase 2A	NA	NA	NM_001191619	NA	NA	NA	NA_x000D_
RAT03984	10.5632	P	13.6296	P	0.119369	8.37735	down	0	RAT03984	0	mRNA	Fxyd3	FXYD domain-containing ion transport regulator 3	NA	NA	NM_172317	NA	NA	NA	NA_x000D_
RAT20039	7.06325	P	8.65147	P	0.332581	3.00678	down	0	RAT20039	0	mRNA	LOC301816	similar to Spindlin-like protein 2 (SPIN-2)	NA	NA	XM_229292	NA	NA	NA	NA_x000D_
RAT22591	10.2771	P	8.87783	P	2.63769	2.63769	up	0	RAT22591	0	mRNA	Gpr56	G protein-coupled receptor 56	NA	NA	NM_152242	NA	NA	NA	NA_x000D_
RAT25541	12.043	P	10.9251	P	2.17032	2.17032	up	0	RAT25541	0	mRNA	Manba	"mannosidase, beta A, lysosomal"	NA	NA	NM_001031655	NA	NA	NA	NA_x000D_
RAT02302	13.4629	P	11.5205	P	3.84325	3.84325	up	0	RAT02302	0	mRNA	Defb1	defensin beta 1	NA	NA	NM_031810	NA	NA	NA	NA_x000D_
RAT24476	5.46048	P	6.86787	P	0.376993	2.65257	down	0	RAT24476	0	mRNA	Gpr161	G protein-coupled receptor 161	NA	NA	ENSRNOT00000067745	NA	NA	NA	NA_x000D_
RAT20981	12.4966	P	11.3731	P	2.17889	2.17889	up	0	RAT20981	0	mRNA	Hoxb7	homeo box B7	NA	NA	NM_001017480	NA	NA	NA	NA_x000D_
RAT29239	4.45151	A	5.87684	P	0.372336	2.68575	down	0	RAT29239	0	mRNA	Pdgfrb	"platelet derived growth factor receptor, beta polypeptide"	NA	NA	NM_031525	NA	NA	NA	NA_x000D_
RAT06519	8.88395	P	9.91395	P	0.489708	2.04203	down	0	RAT06519	0	mRNA	Fam46c	"family with sequence similarity 46, member C"	NA	NA	NM_001014041	NA	NA	NA	NA_x000D_
RAT18313	5.26347	P	3.92602	A	2.52704	2.52704	up	0	RAT18313	0	mRNA	Dscc1	defective in sister chromatid cohesion 1 homolog (S. cerevisiae)	NA	NA	ENSRNOT00000036399	NA	NA	NA	NA_x000D_
RAT25121	5.95619	P	4.94888	A	2.01017	2.01017	up	0	RAT25121	0	mRNA	NA	NA	NA	NA	TC638589	NA	NA	NA	NA_x000D_
RAT25629	5.67871	P	4.25545	A	2.68193	2.68193	up	0	RAT25629	0	mRNA	Shc2	SHC (Src homology 2 domain containing) transforming protein 2	NA	NA	NM_001108065	NA	NA	NA	NA_x000D_
RAT00271	7.0141	P	10.1169	P	0.116402	8.5909	down	0	RAT00271	0	mRNA	Slc7a9	"solute carrier family 7 (glycoprotein-associated amino acid transporter light chain, bo,+ system), member 9"	NA	NA	NM_053929	NA	NA	NA	NA_x000D_
RAT00925	7.10332	P	8.25852	P	0.449002	2.22716	down	0	RAT00925	0	mRNA	Gzmm	granzyme M (lymphocyte met-ase 1)	NA	NA	NM_057183	NA	NA	NA	NA_x000D_
RAT04098	5.13847	A	6.27551	P	0.454693	2.19929	down	0	RAT04098	0	mRNA	Gli1	GLI family zinc finger 1	NA	NA	NM_001191910	NA	NA	NA	NA_x000D_
RAT09358	6.70758	P	5.57072	P	2.19901	2.19901	up	0	RAT09358	0	mRNA	RGD1308396	similar to chromosome 14 open reading frame 21	NA	NA	NM_001106040	NA	NA	NA	NA_x000D_
RAT17209	6.48635	P	5.16664	A	2.49617	2.49617	up	0	RAT17209	0	mRNA	NA	NA	NA	NA	NA	NA	NA	NA	NA_x000D_
RAT20696	8.29845	P	7.23031	P	2.09672	2.09672	up	0	RAT20696	0	mRNA	Polr2m	polymerase (RNA) II (DNA directed) polypeptide M	NA	NA	NM_183402	NA	NA	NA	NA_x000D_
RAT04410	5.76468	P	6.83768	P	0.47533	2.1038	down	0	RAT04410	0	mRNA	Tgfb3	"transforming growth factor, beta 3"	NA	NA	NM_013174	NA	NA	NA	NA_x000D_
RAT03776	7.51239	P	8.71339	P	0.434975	2.29898	down	0	RAT03776	0	mRNA	Bst2	bone marrow stromal cell antigen 2	NA	NA	NM_198134	NA	NA	NA	NA_x000D_
RAT28305	5.71752	P	4.60365	A	2.16426	2.16426	up	0	RAT28305	0	mRNA	NA	NA	NA	NA	NA	NA	NA	NA	NA_x000D_
RAT27700	6.84939	P	4.56625	A	4.86735	4.86735	up	0	RAT27700	0	mRNA	NA	NA	NA	NA	NA	NA	NA	NA	NA_x000D_
RAT10519	8.05851	P	6.89599	P	2.23847	2.23847	up	0	RAT10519	0	mRNA	Irf6	interferon regulatory factor 6	NA	NA	NM_001108859	NA	NA	NA	NA_x000D_
RAT21918	3.93411	A	5.84622	P	0.265702	3.76361	down	0	RAT21918	0	mRNA	NA	NA	NA	NA	NA	NA	NA	NA	NA_x000D_
RAT24526	5.82895	P	8.91436	P	0.117815	8.48786	down	0	RAT24526	0	mRNA	Osr1	odd-skipped related 1 (Drosophila)	NA	NA	NM_001106716	NA	NA	NA	NA_x000D_
RAT06396	6.44061	P	5.14564	A	2.45372	2.45372	up	0	RAT06396	0	mRNA	Cpped1	calcineurin-like phosphoesterase domain containing 1	NA	NA	NM_001013963	NA	NA	NA	NA_x000D_
RAT08166	6.38366	P	5.25527	A	2.18614	2.18614	up	0	RAT08166	0	mRNA	Pde6d	"phosphodiesterase 6D, cGMP-specific, rod, delta"	NA	NA	NM_001108806	NA	NA	NA	NA_x000D_
RAT24673	6.60389	P	7.73376	P	0.456957	2.18839	down	0	RAT24673	0	mRNA	Cdc25b	cell division cycle 25 homolog B (S. pombe)	NA	NA	NM_133572	NA	NA	NA	NA_x000D_
RAT11200	5.7729	P	4.13937	A	3.10272	3.10272	up	0	RAT11200	0	mRNA	Fam81a	"family with sequence similarity 81, member A"	NA	NA	NM_001108163	NA	NA	NA	NA_x000D_
RAT29951	8.13696	P	9.23679	P	0.466571	2.1433	down	0	RAT29951	0	mRNA	Pi16	peptidase inhibitor 16	NA	NA	NM_001170481	NA	NA	NA	NA_x000D_
RAT12195	5.95502	P	4.93126	A	2.0332	2.0332	up	0	RAT12195	0	mRNA	Gzmb	granzyme B	NA	NA	NM_138517	NA	NA	NA	NA_x000D_
RAT17080	13.3778	P	14.3986	P	0.492831	2.02909	down	0	RAT17080	0	mRNA	LOC100366147	hypothetical protein LOC100366147	NA	NA	XM_002727258	NA	NA	NA	NA_x000D_
RAT26263	9.87076	P	8.50915	P	2.56973	2.56973	up	0	RAT26263	0	mRNA	Acss2	acyl-CoA synthetase short-chain family member 2	NA	NA	NM_001107793	NA	NA	NA	NA_x000D_
RAT29413	10.8058	P	12.4707	P	0.315363	3.17095	down	0	RAT29413	0	mRNA	LOC100270669	hypothetical protein LOC100270669	NA	NA	NM_001144957	NA	NA	NA	NA_x000D_
RAT17397	5.53426	P	2.72417	A	7.01324	7.01324	up	0	RAT17397	0	mRNA	LOC501194	similar to hypothetical protein D330021B20	NA	NA	FQ232266	NA	NA	NA	NA_x000D_
RAT14968	7.58246	P	9.21725	P	0.322018	3.10541	down	0	RAT14968	0	mRNA	Car11	carbonic anhydrase 11	NA	NA	NM_175708	NA	NA	NA	NA_x000D_
RAT13244	8.96122	P	10.3667	P	0.377485	2.64911	down	0	RAT13244	0	mRNA	NA	NA	NA	NA	NA	NA	NA	NA	NA_x000D_
RAT14450	12.0751	P	10.8416	P	2.35136	2.35136	up	0	RAT14450	0	mRNA	Defb11	defensin beta 11	NA	NA	NM_001037505	NA	NA	NA	NA_x000D_
RAT28151	5.90827	P	7.18559	P	0.412562	2.42388	down	0	RAT28151	0	mRNA	Glis2	GLIS family zinc finger 2	NA	NA	NM_001106978	NA	NA	NA	NA_x000D_
RAT10869	10.4882	P	9.01165	P	2.7829	2.7829	up	0	RAT10869	0	mRNA	Tmem123	transmembrane protein 123	NA	NA	NM_001014205	NA	NA	NA	NA_x000D_
RAT12973	11.4931	P	9.95837	P	2.89734	2.89734	up	0	RAT12973	0	mRNA	Ces2i	carboxylesterase 2I	NA	NA	ENSRNOT00000015997	NA	NA	NA	NA_x000D_
RAT12039	5.19641	A	6.2902	P	0.468528	2.13434	down	0	RAT12039	0	mRNA	NA	NA	NA	NA	ENSRNOT00000017592	NA	NA	NA	NA_x000D_
RAT18525	7.20671	P	6.19321	P	2.01881	2.01881	up	0	RAT18525	0	mRNA	41528	septin 11	NA	NA	NM_001107208	NA	NA	NA	NA_x000D_
RAT01059	8.59056	P	7.56082	P	2.04165	2.04165	up	0	RAT01059	0	mRNA	MGC125239	hypothetical protein LOC686179	NA	NA	NM_001077231	NA	NA	NA	NA_x000D_
RAT27243	3.83726	A	5.76737	P	0.262411	3.81082	down	0	RAT27243	0	mRNA	Prph	peripherin	NA	NA	NM_012633	NA	NA	NA	NA_x000D_
RAT04890	7.60127	P	8.65518	P	0.481663	2.07614	down	0	RAT04890	0	mRNA	RGD1305298	hypothetical LOC299330	NA	NA	NM_001134526	NA	NA	NA	NA_x000D_
RAT08598	8.79101	P	10.4479	P	0.317124	3.15334	down	0	RAT08598	0	mRNA	Osbp2	oxysterol binding protein 2	NA	NA	NM_001107232	NA	NA	NA	NA_x000D_
RAT26798	12.3125	P	13.3842	P	0.475751	2.10194	down	0	RAT26798	0	mRNA	NA	NA	NA	NA	NA	NA	NA	NA	NA_x000D_
RAT22884	6.86988	P	8.70008	P	0.281227	3.55585	down	0	RAT22884	0	mRNA	LOC501224	similar to RIKEN cDNA 2610042L04	NA	NA	XR_005447	NA	NA	NA	NA_x000D_
RAT10864	5.51288	P	4.39376	A	2.17215	2.17215	up	0	RAT10864	0	mRNA	Cdc14a	CDC14 cell division cycle 14 homolog A (S. cerevisiae)	NA	NA	NM_001134856	NA	NA	NA	NA_x000D_
RAT12700	9.00891	P	7.92093	P	2.12575	2.12575	up	0	RAT12700	0	mRNA	ST7	suppression of tumorigenicity 7	NA	NA	NM_001004102	NA	NA	NA	NA_x000D_
RAT00095	7.71294	P	6.71034	P	2.0036	2.0036	up	0	RAT00095	0	mRNA	Unc50	unc-50 homolog (C. elegans)	NA	NA	NM_138919	NA	NA	NA	NA_x000D_
RAT17042	6.9761	P	9.54405	P	0.168643	5.92968	down	0	RAT17042	0	mRNA	Flrt2	fibronectin leucine rich transmembrane protein 2	NA	NA	NM_001106750	NA	NA	NA	NA_x000D_
RAT22202	7.21258	P	6.07011	P	2.20758	2.20758	up	0	RAT22202	0	mRNA	LOC497848	hypothetical LOC497848	NA	NA	XR_006411	NA	NA	NA	NA_x000D_
RAT10406	7.20906	P	9.07099	P	0.275107	3.63495	down	0	RAT10406	0	mRNA	NA	NA	NA	NA	ENSRNOT00000020846	NA	NA	NA	NA_x000D_
RAT03161	4.90674	A	5.94932	P	0.48546	2.0599	down	0	RAT03161	0	mRNA	Loxl1	lysyl oxidase-like 1	NA	NA	NM_001012125	NA	NA	NA	NA_x000D_
RAT22656	5.67353	P	4.25497	A	2.67319	2.67319	up	0	RAT22656	0	mRNA	Haus7	"HAUS augmin-like complex, subunit 7"	NA	NA	NM_001110488	NA	NA	NA	NA_x000D_
RAT01441	10.7145	P	9.56447	P	2.2192	2.2192	up	0	RAT01441	0	mRNA	Tmem229b	transmembrane protein 229B	NA	NA	NM_001109359	NA	NA	NA	NA_x000D_
RAT28121	6.65438	P	5.45267	P	2.30012	2.30012	up	0	RAT28121	0	mRNA	Prrg2	proline rich Gla (G-carboxyglutamic acid) 2	NA	NA	NM_001108482	NA	NA	NA	NA_x000D_
RAT14419	5.98553	P	4.9392	A	2.06527	2.06527	up	0	RAT14419	0	mRNA	NA	NA	NA	NA	NA	NA	NA	NA	NA_x000D_
RAT11067	6.21627	P	2.64615	A	11.8772	11.8772	up	0	RAT11067	0	mRNA	Cldn2	claudin 2	NA	NA	NM_001106846	NA	NA	NA	NA_x000D_
RAT11959	8.89156	P	10.5355	P	0.319978	3.12522	down	0	RAT11959	0	mRNA	Disp1	dispatched homolog 1 (Drosophila)	NA	NA	NM_001105983	NA	NA	NA	NA_x000D_
RAT03617	9.74066	P	10.8464	P	0.464662	2.1521	down	0	RAT03617	0	mRNA	Heatr8	HEAT repeat containing 8	NA	NA	NM_001100965	NA	NA	NA	NA_x000D_
RAT17608	7.48931	P	10.4973	P	0.124311	8.04431	down	0	RAT17608	0	mRNA	Sema3c	"sema domain, immunoglobulin domain (Ig), short basic domain, secreted, (semaphorin) 3C"	NA	NA	NM_001106578	NA	NA	NA	NA_x000D_
RAT09805	4.3528	A	5.84962	P	0.354334	2.8222	down	0	RAT09805	0	mRNA	Slc6a14	"solute carrier family 6 (amino acid transporter), member 14"	NA	NA	NM_001037544	NA	NA	NA	NA_x000D_
RAT01855	5.90737	P	7.00065	P	0.468697	2.13358	down	0	RAT01855	0	mRNA	Ddit4l	DNA-damage-inducible transcript 4-like	NA	NA	NM_080399	NA	NA	NA	NA_x000D_
RAT14242	4.17302	A	5.41976	P	0.421401	2.37303	down	0	RAT14242	0	mRNA	LOC691044	similar to GTPase activating protein testicular GAP1	NA	NA	XM_001076638	NA	NA	NA	NA_x000D_
RAT07139	7.45044	P	5.65161	P	3.47938	3.47938	up	0	RAT07139	0	mRNA	Tspan12	tetraspanin 12	NA	NA	NM_001015026	NA	NA	NA	NA_x000D_
RAT05738	4.47538	A	5.52429	P	0.483333	2.06896	down	0	RAT05738	0	mRNA	RGD1306441	similar to RIKEN cDNA 4921530L21	NA	NA	NM_001106053	NA	NA	NA	NA_x000D_
RAT09648	8.20186	P	7.02181	P	2.26586	2.26586	up	0	RAT09648	0	mRNA	Fam69b	"family with sequence similarity 69, member B"	NA	NA	NM_001014178	NA	NA	NA	NA_x000D_
RAT16331	6.87238	P	5.43024	A	2.71723	2.71723	up	0	RAT16331	0	mRNA	St13	suppression of tumorigenicity 13	NA	NA	NM_031122	NA	NA	NA	NA_x000D_
RAT13456	7.22163	P	9.47981	P	0.209035	4.78389	down	0	RAT13456	0	mRNA	Lrrc6	leucine rich repeat containing 6 (testis)	NA	NA	NM_001025659	NA	NA	NA	NA_x000D_
RAT06580	7.07149	P	5.95912	P	2.162	2.162	up	0	RAT06580	0	mRNA	RGD1565560	similar to ribosomal protein S11	NA	NA	ENSRNOT00000006659	NA	NA	NA	NA_x000D_
RAT01733	4.69167	A	5.7798	P	0.470369	2.12599	down	0	RAT01733	0	mRNA	Zcchc24	"zinc finger, CCHC domain containing 24"	NA	NA	NM_001108394	NA	NA	NA	NA_x000D_
RAT13179	2.96139	A	6.26963	P	0.100954	9.90554	down	0	RAT13179	0	mRNA	Tapbpl	TAP binding protein-like	NA	NA	NM_001106622	NA	NA	NA	NA_x000D_
RAT00302	8.18511	P	7.16629	P	2.02626	2.02626	up	0	RAT00302	0	mRNA	Rnpep	arginyl aminopeptidase (aminopeptidase B)	NA	NA	NM_031097	NA	NA	NA	NA_x000D_
RAT00310	7.88906	P	6.77869	P	2.15901	2.15901	up	0	RAT00310	0	mRNA	Fam96a	"family with sequence similarity 96, member A"	NA	NA	NM_001008327	NA	NA	NA	NA_x000D_
RAT16934	7.46016	P	6.41618	P	2.06191	2.06191	up	0	RAT16934	0	mRNA	LOC691849	hypothetical protein LOC691849	NA	NA	NM_001198796	NA	NA	NA	NA_x000D_
RAT03731	11.2885	P	10.2155	P	2.10381	2.10381	up	0	RAT03731	0	mRNA	Ces2c	carboxylesterase 2C	NA	NA	NM_133586	NA	NA	NA	NA_x000D_
RAT08371	7.80037	P	6.26876	P	2.89108	2.89108	up	0	RAT08371	0	mRNA	Ina	"internexin neuronal intermediate filament protein, alpha"	NA	NA	NM_019128	NA	NA	NA	NA_x000D_
RAT23732	7.81864	P	8.88395	P	0.477872	2.09261	down	0	RAT23732	0	mRNA	Itgbl1	"integrin, beta-like 1"	NA	NA	NM_001017505	NA	NA	NA	NA_x000D_
RAT00392	11.9022	P	10.8914	P	2.015	2.015	up	0	RAT00392	0	mRNA	Erlec1	endoplasmic reticulum lectin 1	NA	NA	NM_001106023	NA	NA	NA	NA_x000D_
RAT19257	13.07	P	11.4202	P	3.13799	3.13799	up	0	RAT19257	0	mRNA	Aldoc	"aldolase C, fructose-bisphosphate"	NA	NA	NM_012497	NA	NA	NA	NA_x000D_
RAT24766	6.05171	P	7.19923	P	0.4514	2.21533	down	0	RAT24766	0	mRNA	NA	NA	NA	NA	ENSRNOT00000040473	NA	NA	NA	NA_x000D_
RAT19887	4.21349	A	6.07631	P	0.274937	3.63719	down	0	RAT19887	0	mRNA	NA	NA	NA	NA	NA	NA	NA	NA	NA_x000D_
RAT23631	5.41392	P	4.04066	A	2.59057	2.59057	up	0	RAT23631	0	mRNA	Mfsd6l	major facilitator superfamily domain containing 6-like	NA	NA	NM_001105787	NA	NA	NA	NA_x000D_
RAT24211	10.4258	P	11.4635	P	0.4871	2.05297	down	0	RAT24211	0	mRNA	LOC500959	triosephosphate isomerase	NA	NA	NM_001033072	NA	NA	NA	NA_x000D_
RAT22343	5.70239	P	3.84315	A	3.62817	3.62817	up	0	RAT22343	0	mRNA	Col15a1	"collagen, type XV, alpha 1"	NA	NA	ENSRNOT00000017217	NA	NA	NA	NA_x000D_
RAT12372	5.71775	P	7.08996	P	0.386299	2.58867	down	0	RAT12372	0	mRNA	NA	NA	NA	NA	NA	NA	NA	NA	NA_x000D_
RAT00484	12.4551	P	14.8846	P	0.185633	5.38698	down	0	RAT00484	0	mRNA	Ccdc80	coiled-coil domain containing 80	NA	NA	NM_022543	NA	NA	NA	NA_x000D_
RAT02707	9.92726	P	8.82144	P	2.15221	2.15221	up	0	RAT02707	0	mRNA	Uso1	USO1 vesicle docking protein homolog (yeast)	NA	NA	NM_019379	NA	NA	NA	NA_x000D_
RAT24725	6.39544	P	5.23027	A	2.2426	2.2426	up	0	RAT24725	0	mRNA	Zmat5	"zinc finger, matrin type 5"	NA	NA	ENSRNOT00000010332	NA	NA	NA	NA_x000D_
RAT22338	8.81429	P	7.77837	P	2.05042	2.05042	up	0	RAT22338	0	mRNA	NA	NA	NA	NA	NA	NA	NA	NA	NA_x000D_
RAT00375	9.95231	P	8.72338	P	2.34395	2.34395	up	0	RAT00375	0	mRNA	Snx18	sorting nexin 18	NA	NA	NM_001107652	NA	NA	NA	NA_x000D_
RAT17487	5.00892	A	6.12628	P	0.460934	2.16951	down	0	RAT17487	0	mRNA	NA	NA	NA	NA	ENSRNOT00000049208	NA	NA	NA	NA_x000D_
RAT00169	4.16822	A	5.66365	P	0.354676	2.81948	down	0	RAT00169	0	mRNA	Vstm2b	V-set and transmembrane domain containing 2B	NA	NA	NM_001108479	NA	NA	NA	NA_x000D_
RAT23345	5.46961	P	6.49398	P	0.491625	2.03407	down	0	RAT23345	0	mRNA	NA	NA	NA	NA	NA	NA	NA	NA	NA_x000D_
RAT20997	6.98548	P	8.56876	P	0.333722	2.9965	down	0	RAT20997	0	mRNA	NA	NA	NA	NA	ENSRNOT00000040473	NA	NA	NA	NA_x000D_
RAT29282	7.15015	P	8.51371	P	0.388623	2.57319	down	0	RAT29282	0	mRNA	NA	NA	NA	NA	ENSRNOT00000034267	NA	NA	NA	NA_x000D_
RAT27620	6.0956	P	7.58128	P	0.357082	2.80048	down	0	RAT27620	0	mRNA	NA	NA	NA	NA	NA	NA	NA	NA	NA_x000D_
RAT01861	10.1282	P	11.551	P	0.37297	2.68118	down	0	RAT01861	0	mRNA	RGD1566239	similar to RIKEN cDNA 2810428I15	NA	NA	NM_001107305	NA	NA	NA	NA_x000D_
RAT08678	9.93216	P	12.5232	P	0.165969	6.02522	down	0	RAT08678	0	mRNA	Lgals1	"lectin, galactoside-binding, soluble, 1"	NA	NA	NM_019904	NA	NA	NA	NA_x000D_
RAT23701	6.86688	P	5.81165	P	2.07805	2.07805	up	0	RAT23701	0	mRNA	NA	NA	NA	NA	ENSRNOT00000029671	NA	NA	NA	NA_x000D_
RAT02553	5.88766	P	7.06269	P	0.442876	2.25797	down	0	RAT02553	0	mRNA	Mpdz	multiple PDZ domain protein	NA	NA	NM_019196	NA	NA	NA	NA_x000D_
RAT24738	7.1998	P	8.47062	P	0.414425	2.41298	down	0	RAT24738	0	mRNA	LOC686907	similar to cis-Golgi matrix protein GM130	NA	NA	XM_001076221	NA	NA	NA	NA_x000D_
RAT10801	8.41368	P	7.3932	P	2.02859	2.02859	up	0	RAT10801	0	mRNA	Rngtt	RNA guanylyltransferase and 5'-phosphatase	NA	NA	NM_001107923	NA	NA	NA	NA_x000D_
RAT10865	5.95438	P	4.77406	A	2.26626	2.26626	up	0	RAT10865	0	mRNA	Tmem144	transmembrane protein 144	NA	NA	NM_001108551	NA	NA	NA	NA_x000D_
RAT01057	14.0263	P	12.7152	P	2.48144	2.48144	up	0	RAT01057	0	mRNA	Glb1	"galactosidase, beta 1"	NA	NA	NM_001108192	NA	NA	NA	NA_x000D_
RAT25637	6.70076	P	7.79369	P	0.468807	2.13307	down	0	RAT25637	0	mRNA	NA	NA	NA	NA	ENSRNOT00000039392	NA	NA	NA	NA_x000D_
RAT26988	7.10737	P	9.348	P	0.211593	4.72604	down	0	RAT26988	0	mRNA	NA	NA	NA	NA	NA	NA	NA	NA	NA_x000D_
RAT03748	8.47287	P	6.88872	P	2.99832	2.99832	up	0	RAT03748	0	mRNA	RGD1305007	similar to RIKEN cDNA 1110031I02	NA	NA	NM_001013976	NA	NA	NA	NA_x000D_
RAT05006	5.69453	P	6.88125	P	0.439301	2.27634	down	0	RAT05006	0	mRNA	NA	NA	NA	NA	ENSRNOT00000046713	NA	NA	NA	NA_x000D_
RAT13936	10.209	P	11.641	P	0.370609	2.69826	down	0	RAT13936	0	mRNA	NA	NA	NA	NA	FQ228611	NA	NA	NA	NA_x000D_
RAT07209	5.47441	P	6.48025	P	0.497981	2.00811	down	0	RAT07209	0	mRNA	Lrrc63	leucine rich repeat containing 63	NA	NA	NM_001024803	NA	NA	NA	NA_x000D_
RAT06592	5.76965	P	4.13793	A	3.09883	3.09883	up	0	RAT06592	0	mRNA	Ptpro	"protein tyrosine phosphatase, receptor type, O"	NA	NA	NM_017336	NA	NA	NA	NA_x000D_
RAT13836	10.7414	P	12.7972	P	0.240524	4.15759	down	0	RAT13836	0	mRNA	Cc2d1a	coiled-coil and C2 domain containing 1A	NA	NA	NM_001013869	NA	NA	NA	NA_x000D_
RAT00029	4.70867	A	6.03554	P	0.398633	2.50857	down	0	RAT00029	0	mRNA	Pkdcc	"protein kinase domain containing, cytoplasmic homolog (mouse)"	NA	NA	NM_001108007	NA	NA	NA	NA_x000D_
RAT19412	6.53017	P	5.44184	P	2.12627	2.12627	up	0	RAT19412	0	mRNA	Pet112l	PET112-like (yeast)	NA	NA	ENSRNOT00000057128	NA	NA	NA	NA_x000D_
RAT04064	6.45483	P	8.93416	P	0.179328	5.57638	down	0	RAT04064	0	mRNA	RGD1562717	"similar to ABI gene family, member 3 (NESH) binding protein"	NA	NA	ENSRNOT00000049859	NA	NA	NA	NA_x000D_
RAT09536	10.6028	P	9.41572	P	2.27686	2.27686	up	0	RAT09536	0	mRNA	RGD1562344	similar to Gm566 protein	NA	NA	NM_001106459	NA	NA	NA	NA_x000D_
RAT00465	10.4246	P	8.75628	P	3.17847	3.17847	up	0	RAT00465	0	mRNA	Acot1	acyl-CoA thioesterase 1	NA	NA	NM_031315	NA	NA	NA	NA_x000D_
RAT26658	5.90265	P	2.7023	A	9.19188	9.19188	up	0	RAT26658	0	mRNA	Nfia	nuclear factor I/A	NA	NA	NM_012988	NA	NA	NA	NA_x000D_
RAT03084	6.46648	P	4.71553	A	3.36581	3.36581	up	0	RAT03084	0	mRNA	Dsc2	desmocollin 2	NA	NA	NM_001033688	NA	NA	NA	NA_x000D_
RAT12778	5.82777	P	4.63136	A	2.2917	2.2917	up	0	RAT12778	0	mRNA	NA	NA	NA	NA	NA	NA	NA	NA	NA_x000D_
RAT08085	5.74479	P	7.7039	P	0.257188	3.8882	down	0	RAT08085	0	mRNA	Maf	v-maf musculoaponeurotic fibrosarcoma oncogene homolog (avian)	NA	NA	NM_019318	NA	NA	NA	NA_x000D_
RAT00711	10.4437	P	11.9438	P	0.353529	2.82862	down	0	RAT00711	0	mRNA	RGD1303142	oxidative stress responsive gene	NA	NA	NM_201560	NA	NA	NA	NA_x000D_
RAT06954	2.71473	A	5.3515	P	0.160788	6.21938	down	0	RAT06954	0	mRNA	F7	coagulation factor VII (serum prothrombin conversion accelerator)	NA	NA	NM_152846	NA	NA	NA	NA_x000D_
RAT02384	5.3676	P	2.70437	A	6.33451	6.33451	up	0	RAT02384	0	mRNA	Arfrp1	ADP-ribosylation factor related protein 1	NA	NA	NM_053980	NA	NA	NA	NA_x000D_
RAT04192	5.92648	P	7.50889	P	0.333924	2.99469	down	0	RAT04192	0	mRNA	Diaph3	diaphanous homolog 3 (Drosophila)	NA	NA	ENSRNOT00000012167	NA	NA	NA	NA_x000D_
RAT25025	6.86374	P	8.36985	P	0.352059	2.84043	down	0	RAT25025	0	mRNA	NA	NA	NA	NA	XM_217965	NA	NA	NA	NA_x000D_
RAT23718	7.66794	P	6.40855	P	2.39394	2.39394	up	0	RAT23718	0	mRNA	Vps13b	vacuolar protein sorting 13 homolog B (yeast)	NA	NA	NM_001134886	NA	NA	NA	NA_x000D_
RAT15762	8.74565	P	7.63617	P	2.15768	2.15768	up	0	RAT15762	0	mRNA	NA	NA	NA	NA	TC636443	NA	NA	NA	NA_x000D_
RAT00914	6.1798	P	5.0615	A	2.17091	2.17091	up	0	RAT00914	0	mRNA	NA	NA	NA	NA	FQ220776	NA	NA	NA	NA_x000D_
RAT30208	5.65065	P	6.87075	P	0.429255	2.32962	down	0	RAT30208	0	mRNA	NA	NA	NA	NA	ENSRNOT00000026074	NA	NA	NA	NA_x000D_
RAT12793	4.0243	A	6.04612	P	0.246247	4.06096	down	0	RAT12793	0	mRNA	Dcaf12l1	DDB1 and CUL4 associated factor 12-like 1	NA	NA	NM_001107941	NA	NA	NA	NA_x000D_
RAT03660	7.77729	P	6.37251	P	2.64777	2.64777	up	0	RAT03660	0	mRNA	Rnf103	ring finger protein 103	NA	NA	NM_053438	NA	NA	NA	NA_x000D_
RAT09159	12.6463	P	14.4159	P	0.293273	3.40979	down	0	RAT09159	0	mRNA	RGD1560258	similar to RIKEN cDNA 4930579G22	NA	NA	NM_001134570	NA	NA	NA	NA_x000D_
RAT11649	9.28809	P	10.4242	P	0.454987	2.19786	down	0	RAT11649	0	mRNA	Rnf133	ring finger protein 133	NA	NA	NM_001044278	NA	NA	NA	NA_x000D_
RAT01862	13.9	P	15.2915	P	0.381156	2.6236	down	0	RAT01862	0	mRNA	Reep6	receptor accessory protein 6	NA	NA	NM_001013218	NA	NA	NA	NA_x000D_
RAT10423	9.14984	P	8.02038	P	2.18777	2.18777	up	0	RAT10423	0	mRNA	Iars	isoleucyl-tRNA synthetase	NA	NA	NM_001100572	NA	NA	NA	NA_x000D_
RAT03632	11.231	P	12.7284	P	0.354198	2.82328	down	0	RAT03632	0	mRNA	Bag1	BCL2-associated athanogene	NA	NA	NM_001106647	NA	NA	NA	NA_x000D_
RAT30221	8.10776	P	7.06223	P	2.06412	2.06412	up	0	RAT30221	0	mRNA	Zc3h13	zinc finger CCCH type containing 13	NA	NA	NM_001170471	NA	NA	NA	NA_x000D_
RAT23104	7.01579	P	9.78144	P	0.147047	6.80054	down	0	RAT23104	0	mRNA	Bmp4	bone morphogenetic protein 4	NA	NA	NM_012827	NA	NA	NA	NA_x000D_
RAT16537	6.84119	P	5.65278	P	2.27901	2.27901	up	0	RAT16537	0	mRNA	Sigmar1	sigma non-opioid intracellular receptor 1	NA	NA	NM_030996	NA	NA	NA	NA_x000D_
RAT02053	6.34754	P	4.4444	A	3.74027	3.74027	up	0	RAT02053	0	mRNA	Klkb1	"kallikrein B, plasma 1"	NA	NA	NM_012725	NA	NA	NA	NA_x000D_
RAT25407	15.0398	P	13.7647	P	2.42016	2.42016	up	0	RAT25407	0	mRNA	Defb2	defensin beta 2	NA	NA	NM_001037507	NA	NA	NA	NA_x000D_
RAT02268	11.0596	P	9.48387	P	2.98079	2.98079	up	0	RAT02268	0	mRNA	Suox	sulfite oxidase	NA	NA	NM_031127	NA	NA	NA	NA_x000D_
RAT07020	4.74988	A	6.03733	P	0.409675	2.44096	down	0	RAT07020	0	mRNA	Magi2	"membrane associated guanylate kinase, WW and PDZ domain containing 2"	NA	NA	NM_053621	NA	NA	NA	NA_x000D_
RAT04411	6.94337	P	5.43914	P	2.83673	2.83673	up	0	RAT04411	0	mRNA	Tp53inp2	tumor protein p53 inducible nuclear protein 2	NA	NA	XM_001074013	NA	NA	NA	NA_x000D_
RAT23970	8.12793	P	6.69649	P	2.69715	2.69715	up	0	RAT23970	0	mRNA	NA	NA	NA	NA	NA	NA	NA	NA	NA_x000D_
RAT11711	6.75543	P	8.32585	P	0.336709	2.96992	down	0	RAT11711	0	mRNA	LOC686921	hypothetical protein LOC686921	NA	NA	XM_001076338	NA	NA	NA	NA_x000D_
RAT00499	9.46339	P	8.1975	P	2.40477	2.40477	up	0	RAT00499	0	mRNA	Dnajb11	"DnaJ (Hsp40) homolog, subfamily B, member 11"	NA	NA	NM_001015021	NA	NA	NA	NA_x000D_
RAT27885	7.51616	P	5.94635	P	2.96866	2.96866	up	0	RAT27885	0	mRNA	Rpp30	ribonuclease P/MRP 30 subunit (human)	NA	NA	NM_001191083	NA	NA	NA	NA_x000D_
RAT27925	8.62528	P	10.1637	P	0.344266	2.90473	down	0	RAT27925	0	mRNA	Irgc1	"immunity-related GTPase family, cinema 1"	NA	NA	NM_001014016	NA	NA	NA	NA_x000D_
RAT05962	6.42709	P	8.25242	P	0.282177	3.54388	down	0	RAT05962	0	mRNA	Adck5	aarF domain containing kinase 5	NA	NA	NM_001135798	NA	NA	NA	NA_x000D_
RAT22690	6.18337	P	7.53898	P	0.39077	2.55905	down	0	RAT22690	0	mRNA	LOC691728	similar to spermatogenesis associated glutamate (E)-rich protein 4d	NA	NA	XM_001079400	NA	NA	NA	NA_x000D_
RAT18627	8.23483	P	6.95778	P	2.42343	2.42343	up	0	RAT18627	0	mRNA	NA	NA	NA	NA	NA	NA	NA	NA	NA_x000D_
RAT20856	6.52259	P	8.72286	P	0.217597	4.59566	down	0	RAT20856	0	mRNA	RGD1563748	similar to ankyrin-like protein	NA	NA	XM_001071970	NA	NA	NA	NA_x000D_
RAT11392	7.08278	P	8.12091	P	0.486959	2.05356	down	0	RAT11392	0	mRNA	RGD1565212	similar to 4930578I06Rik protein	NA	NA	NM_001109103	NA	NA	NA	NA_x000D_
RAT18718	7.71333	P	9.46284	P	0.297402	3.36245	down	0	RAT18718	0	mRNA	Lrrc6	leucine rich repeat containing 6 (testis)	NA	NA	NM_001025659	NA	NA	NA	NA_x000D_
RAT24484	9.91333	P	8.85617	P	2.08082	2.08082	up	0	RAT24484	0	mRNA	Adpgk	ADP-dependent glucokinase	NA	NA	NM_001100723	NA	NA	NA	NA_x000D_
RAT25622	5.82088	P	7.12679	P	0.404466	2.4724	down	0	RAT25622	0	mRNA	Rcor3	REST corepressor 3	NA	NA	NM_001134985	NA	NA	NA	NA_x000D_
RAT11997	7.07984	P	8.43378	P	0.391224	2.55608	down	0	RAT11997	0	mRNA	Tbc1d5	"TBC1 domain family, member 5"	NA	NA	ENSRNOT00000061800	NA	NA	NA	NA_x000D_
RAT08329	10.5509	P	11.5662	P	0.494731	2.0213	down	0	RAT08329	0	mRNA	Agpat1	"1-acylglycerol-3-phosphate O-acyltransferase 1 (lysophosphatidic acid acyltransferase, alpha)"	NA	NA	NM_212458	NA	NA	NA	NA_x000D_
RAT15088	4.16454	A	5.80325	P	0.321144	3.11387	down	0	RAT15088	0	mRNA	NA	NA	NA	NA	NA	NA	NA	NA	NA_x000D_
RAT09152	6.88696	P	5.2996	A	3.00498	3.00498	up	0	RAT09152	0	mRNA	Ccnd2	cyclin D2	NA	NA	NM_022267	NA	NA	NA	NA_x000D_
RAT24042	13.257	P	12.0064	P	2.37941	2.37941	up	0	RAT24042	0	mRNA	Defb38	defensin beta 38	NA	NA	NM_001037552	NA	NA	NA	NA_x000D_
RAT01258	10.5119	P	9.34557	P	2.24432	2.24432	up	0	RAT01258	0	mRNA	Stk39	serine threonine kinase 39	NA	NA	NM_019362	NA	NA	NA	NA_x000D_
RAT14059	6.47274	P	8.01477	P	0.343402	2.91204	down	0	RAT14059	0	mRNA	Colec12	collectin sub-family member 12	NA	NA	NM_001025721	NA	NA	NA	NA_x000D_
RAT04619	8.64142	P	10.6599	P	0.246822	4.05151	down	0	RAT04619	0	mRNA	NA	NA	NA	NA	ENSRNOT00000031380	NA	NA	NA	NA_x000D_
RAT03655	8.21647	P	6.9216	P	2.45355	2.45355	up	0	RAT03655	0	mRNA	Tmco1	transmembrane and coiled-coil domains 1	NA	NA	NM_001009631	NA	NA	NA	NA_x000D_
RAT01539	5.00636	A	6.79788	P	0.288867	3.4618	down	0	RAT01539	0	mRNA	Acvrl1	activin A receptor type II-like 1	NA	NA	NM_022441	NA	NA	NA	NA_x000D_
RAT17270	9.04721	P	10.1144	P	0.477261	2.09529	down	0	RAT17270	0	mRNA	Tnfaip8	"tumor necrosis factor, alpha-induced protein 8"	NA	NA	NM_001107387	NA	NA	NA	NA_x000D_
RAT02563	15.2779	P	14.242	P	2.05042	2.05042	up	0	RAT02563	0	mRNA	Dbi	"diazepam binding inhibitor (GABA receptor modulator, acyl-CoA binding protein)"	NA	NA	NM_031853	NA	NA	NA	NA_x000D_
RAT15057	10.0021	P	8.93065	P	2.10156	2.10156	up	0	RAT15057	0	mRNA	Spcs2	signal peptidase complex subunit 2 homolog (S. cerevisiae)	NA	NA	NM_001191601	NA	NA	NA	NA_x000D_
RAT24913	7.79419	P	8.89349	P	0.466741	2.14251	down	0	RAT24913	0	mRNA	NA	NA	NA	NA	NA	NA	NA	NA	NA_x000D_
RAT29425	9.13212	P	10.1519	P	0.493199	2.02758	down	0	RAT29425	0	mRNA	RGD1310507	similar to RIKEN cDNA 1300017J02	NA	NA	NM_001047891	NA	NA	NA	NA_x000D_
RAT27662	7.6492	P	6.23471	P	2.66565	2.66565	up	0	RAT27662	0	mRNA	Pigh	"phosphatidylinositol glycan anchor biosynthesis, class H"	NA	NA	NM_001108714	NA	NA	NA	NA_x000D_
RAT19729	5.98983	P	7.44139	P	0.365627	2.73503	down	0	RAT19729	0	mRNA	Arl4d	ADP-ribosylation factor-like 4D	NA	NA	NM_001107052	NA	NA	NA	NA_x000D_
RAT05984	5.98668	P	7.14829	P	0.447013	2.23707	down	0	RAT05984	0	mRNA	Spata5	spermatogenesis associated 5	NA	NA	NM_001108549	NA	NA	NA	NA_x000D_
RAT00615	7.52379	P	9.70707	P	0.220174	4.54186	down	0	RAT00615	0	mRNA	Bcl3	B-cell CLL/lymphoma 3	NA	NA	NM_001109422	NA	NA	NA	NA_x000D_
RAT09183	5.5348	P	4.51664	A	2.02533	2.02533	up	0	RAT09183	0	mRNA	Prrx1	paired related homeobox 1	NA	NA	NM_153821	NA	NA	NA	NA_x000D_
RAT02096	4.65404	A	5.77231	P	0.460644	2.17087	down	0	RAT02096	0	mRNA	Sdc2	syndecan 2	NA	NA	NM_013082	NA	NA	NA	NA_x000D_
RAT19240	7.47516	P	8.53086	P	0.481062	2.07874	down	0	RAT19240	0	mRNA	Otud7b	OTU domain containing 7B	NA	NA	NM_001107697	NA	NA	NA	NA_x000D_
RAT12279	8.50097	P	10.4021	P	0.267742	3.73494	down	0	RAT12279	0	mRNA	LOC688916	hypothetical protein LOC688916	NA	NA	XM_001068819	NA	NA	NA	NA_x000D_
RAT15563	4.52415	A	5.55992	P	0.487757	2.0502	down	0	RAT15563	0	mRNA	Top2a	topoisomerase (DNA) II alpha	NA	NA	ENSRNOT00000050725	NA	NA	NA	NA_x000D_
RAT21751	5.30257	P	6.81319	P	0.35096	2.84933	down	0	RAT21751	0	mRNA	Obp3	alpha-2u globulin PGCL4	NA	NA	NM_147215	NA	NA	NA	NA_x000D_
RAT18587	11.4161	P	12.6214	P	0.433674	2.30588	down	0	RAT18587	0	mRNA	LOC100361404	hypothetical protein LOC100361404	NA	NA	XM_002729057	NA	NA	NA	NA_x000D_
RAT30036	5.50738	P	3.72842	A	3.43178	3.43178	up	0	RAT30036	0	mRNA	Liph	"lipase, member H"	NA	NA	NM_001044279	NA	NA	NA	NA_x000D_
RAT01228	7.92497	P	6.74536	P	2.26516	2.26516	up	0	RAT01228	0	mRNA	Atl2	atlastin GTPase 2	NA	NA	NM_001100671	NA	NA	NA	NA_x000D_
RAT01066	7.0112	P	8.06192	P	0.482727	2.07156	down	0	RAT01066	0	mRNA	Mmp23	matrix metallopeptidase 23	NA	NA	NM_053606	NA	NA	NA	NA_x000D_
RAT20873	6.37999	P	5.29251	A	2.12502	2.12502	up	0	RAT20873	0	mRNA	Ccrn4l	CCR4 carbon catabolite repression 4-like (S. cerevisiae)	NA	NA	NM_138526	NA	NA	NA	NA_x000D_
RAT21663	5.30755	P	7.16386	P	0.276183	3.62079	down	0	RAT21663	0	mRNA	Eef2k	eukaryotic elongation factor-2 kinase	NA	NA	NM_012947	NA	NA	NA	NA_x000D_
RAT29854	2.74304	A	6.11704	P	0.0964557	10.3675	down	0	RAT29854	0	mRNA	NA	NA	NA	NA	TC609866	NA	NA	NA	NA_x000D_
RAT03531	8.36566	P	9.5247	P	0.447808	2.2331	down	0	RAT03531	0	mRNA	Arl9	ADP-ribosylation factor-like 9	NA	NA	NM_212459	NA	NA	NA	NA_x000D_
RAT26436	4.8239	A	6.67793	P	0.276618	3.61509	down	0	RAT26436	0	mRNA	LOC690490	similar to similar to RIKEN cDNA 1700001E04	NA	NA	XM_001074598	NA	NA	NA	NA_x000D_
RAT06742	8.99108	P	10.0098	P	0.493567	2.02607	down	0	RAT06742	0	mRNA	Slc48a1	"solute carrier family 48 (heme transporter), member 1"	NA	NA	NM_001127456	NA	NA	NA	NA_x000D_
RAT09229	5.60844	P	4.14898	A	2.75004	2.75004	up	0	RAT09229	0	mRNA	Itgb7	"integrin, beta 7"	NA	NA	NM_013171	NA	NA	NA	NA_x000D_
RAT01994	5.72481	P	6.92022	P	0.436662	2.2901	down	0	RAT01994	0	mRNA	Aifm2	"apoptosis-inducing factor, mitochondrion-associated 2"	NA	NA	NM_001139483	NA	NA	NA	NA_x000D_
RAT17321	12.6281	P	11.5059	P	2.1767	2.1767	up	0	RAT17321	0	mRNA	RGD1563348	similar to Selenoprotein H	NA	NA	NM_001114939	NA	NA	NA	NA_x000D_
RAT23940	6.69897	P	5.5172	P	2.26855	2.26855	up	0	RAT23940	0	mRNA	Tmem88b	transmembrane protein 88B	NA	NA	NM_001109426	NA	NA	NA	NA_x000D_
RAT22939	7.41359	P	6.11133	P	2.46615	2.46615	up	0	RAT22939	0	mRNA	Cyp4f17	"cytochrome P450, family 4, subfamily f, polypeptide 17"	NA	NA	NM_001191986	NA	NA	NA	NA_x000D_
RAT26311	7.57925	P	9.08341	P	0.352536	2.83659	down	0	RAT26311	0	mRNA	Tmem25	transmembrane protein 25	NA	NA	NM_001109528	NA	NA	NA	NA_x000D_
RAT10384	4.8246	A	6.47131	P	0.319366	3.1312	down	0	RAT10384	0	mRNA	NA	NA	NA	NA	TC642059	NA	NA	NA	NA_x000D_
RAT17309	7.56891	P	6.45886	P	2.15853	2.15853	up	0	RAT17309	0	mRNA	Trappc6b	trafficking protein particle complex 6B	NA	NA	NM_001106733	NA	NA	NA	NA_x000D_
RAT14537	8.80893	P	9.91066	P	0.465958	2.14612	down	0	RAT14537	0	mRNA	NA	NA	NA	NA	ENSRNOT00000047448	NA	NA	NA	NA_x000D_
RAT04981	9.3424	P	8.08618	P	2.38869	2.38869	up	0	RAT04981	0	mRNA	Echdc3	enoyl Coenzyme A hydratase domain containing 3	NA	NA	NM_001101010	NA	NA	NA	NA_x000D_
RAT25258	14.4695	P	12.72	P	3.36226	3.36226	up	0	RAT25258	0	mRNA	Tmed6	transmembrane emp24 protein transport domain containing 6	NA	NA	NM_001106183	NA	NA	NA	NA_x000D_
RAT06335	7.66187	P	6.42945	P	2.3496	2.3496	up	0	RAT06335	0	mRNA	Pxmp4	peroxisomal membrane protein 4	NA	NA	NM_172223	NA	NA	NA	NA_x000D_
RAT10900	6.50846	P	4.85794	A	3.13947	3.13947	up	0	RAT10900	0	mRNA	Abhd13	abhydrolase domain containing 13	NA	NA	NM_001107327	NA	NA	NA	NA_x000D_
RAT23721	7.57543	P	8.67814	P	0.465642	2.14757	down	0	RAT23721	0	mRNA	NA	NA	NA	NA	NA	NA	NA	NA	NA_x000D_
RAT21868	8.58063	P	7.48302	P	2.13999	2.13999	up	0	RAT21868	0	mRNA	Hoga1	4-hydroxy-2-oxoglutarate aldolase 1	NA	NA	NM_001106355	NA	NA	NA	NA_x000D_
RAT10996	8.21073	P	7.19046	P	2.0283	2.0283	up	0	RAT10996	0	mRNA	Grhl2	grainyhead-like 2 (Drosophila)	NA	NA	NM_001134527	NA	NA	NA	NA_x000D_
RAT01171	8.53177	P	7.49136	P	2.05681	2.05681	up	0	RAT01171	0	mRNA	Gnpda1	glucosamine-6-phosphate deaminase 1	NA	NA	NM_001134995	NA	NA	NA	NA_x000D_
RAT19128	7.46667	P	9.07164	P	0.328744	3.04188	down	0	RAT19128	0	mRNA	RGD1562877	RGD1562877	NA	NA	CV103892	NA	NA	NA	NA_x000D_
RAT09387	10.8633	P	12.9929	P	0.22852	4.37598	down	0	RAT09387	0	mRNA	Tbc1d5	"TBC1 domain family, member 5"	NA	NA	NM_001134762	NA	NA	NA	NA_x000D_
RAT17210	8.38073	P	9.88392	P	0.352771	2.8347	down	0	RAT17210	0	mRNA	Rap2ip	Rap2 interacting protein	NA	NA	NM_198758	NA	NA	NA	NA_x000D_
RAT00811	7.19458	P	5.59882	P	3.02254	3.02254	up	0	RAT00811	0	mRNA	NA	NA	NA	NA	TC580917	NA	NA	NA	NA_x000D_
RAT29102	5.37461	P	3.89114	A	2.79621	2.79621	up	0	RAT29102	0	mRNA	Cask	calcium/calmodulin-dependent serine protein kinase (MAGUK family)	NA	NA	NM_022184	NA	NA	NA	NA_x000D_
RAT10509	9.20143	P	10.2309	P	0.489874	2.04134	down	0	RAT10509	0	mRNA	Iqcf5	IQ motif containing F5	NA	NA	NM_001145072	NA	NA	NA	NA_x000D_
RAT14158	7.40414	P	5.9549	P	2.73064	2.73064	up	0	RAT14158	0	mRNA	Fam18b2	"family with sequence similarity 18, member B2"	NA	NA	NM_001107568	NA	NA	NA	NA_x000D_
RAT03953	10.3692	P	8.66876	P	3.25004	3.25004	up	0	RAT03953	0	mRNA	Hspa1b	heat shock 70kD protein 1B (mapped)	NA	NA	NM_212504	NA	NA	NA	NA_x000D_
RAT02084	5.7392	P	9.06838	P	0.0994988	10.0504	down	0	RAT02084	0	mRNA	Pnoc	prepronociceptin	NA	NA	NM_013007	NA	NA	NA	NA_x000D_
RAT29190	8.70121	P	9.97773	P	0.412788	2.42255	down	0	RAT29190	0	mRNA	Rilp	Rab interacting lysosomal protein	NA	NA	NM_001105811	NA	NA	NA	NA_x000D_
RAT13206	10.0344	P	11.5882	P	0.340596	2.93603	down	0	RAT13206	0	mRNA	Bsg	basigin	NA	NA	NM_001109882	NA	NA	NA	NA_x000D_
RAT27091	6.57513	P	8.185	P	0.327629	3.05223	down	0	RAT27091	0	mRNA	Ifi204	interferon activated gene 204	NA	NA	NM_001012029	NA	NA	NA	NA_x000D_
RAT12588	5.8079	P	4.74905	A	2.08327	2.08327	up	0	RAT12588	0	mRNA	NA	NA	NA	NA	ENSRNOT00000021070	NA	NA	NA	NA_x000D_
RAT06837	4.66443	A	5.82654	P	0.446857	2.23785	down	0	RAT06837	0	mRNA	LOC100364602	a disintegrin and metallopeptidase domain 21-like	NA	NA	XM_002726762	NA	NA	NA	NA_x000D_
RAT00670	11.3691	P	10.3459	P	2.03252	2.03252	up	0	RAT00670	0	mRNA	Lsm6	"LSM6 homolog, U6 small nuclear RNA associated (S. cerevisiae)"	NA	NA	NM_001126085	NA	NA	NA	NA_x000D_
RAT02608	8.21943	P	10.4717	P	0.209888	4.76444	down	0	RAT02608	0	mRNA	Scg5	secretogranin V	NA	NA	NM_013175	NA	NA	NA	NA_x000D_
RAT03456	10.4118	P	9.40886	P	2.0041	2.0041	up	0	RAT03456	0	mRNA	LOC300024	similar to Ly6-B antigen gene	NA	NA	ENSRNOT00000043055	NA	NA	NA	NA_x000D_
RAT21378	7.65354	P	10.2432	P	0.166125	6.01957	down	0	RAT21378	0	mRNA	Cybrd1	cytochrome b reductase 1	NA	NA	NM_001011954	NA	NA	NA	NA_x000D_
RAT04597	5.3077	A	6.90569	P	0.330335	3.02723	down	0	RAT04597	0	mRNA	Palm	paralemmin	NA	NA	NM_130829	NA	NA	NA	NA_x000D_
RAT22055	6.55792	P	7.74595	P	0.438902	2.27841	down	0	RAT22055	0	mRNA	LOC688828	similar to Nucleoside diphosphate-linked moiety X motif 16 (Nudix motif 16)	NA	NA	NM_001109516	NA	NA	NA	NA_x000D_
RAT19587	6.53964	P	8.0527	P	0.350365	2.85416	down	0	RAT19587	0	mRNA	Trim17	tripartite motif-containing 17	NA	NA	NM_022798	NA	NA	NA	NA_x000D_
RAT07941	6.73325	P	8.47211	P	0.299608	3.33769	down	0	RAT07941	0	mRNA	Cntln	"centlein, centrosomal protein"	NA	NA	NM_001114402	NA	NA	NA	NA_x000D_
RAT05107	7.37296	P	6.16985	P	2.30234	2.30234	up	0	RAT05107	0	mRNA	Utp18	"UTP18, small subunit (SSU) processome component, homolog (yeast)"	NA	NA	NM_001135039	NA	NA	NA	NA_x000D_
RAT21560	6.88153	P	5.68315	P	2.29482	2.29482	up	0	RAT21560	0	mRNA	Utp15	"UTP15, U3 small nucleolar ribonucleoprotein, homolog (S. cerevisiae)"	NA	NA	NM_001107647	NA	NA	NA	NA_x000D_
RAT08110	3.59258	A	5.80724	P	0.215437	4.64174	down	0	RAT08110	0	mRNA	Esr1	estrogen receptor 1	NA	NA	NM_012689	NA	NA	NA	NA_x000D_
RAT09658	9.67731	P	8.26548	P	2.66075	2.66075	up	0	RAT09658	0	mRNA	Bpnt1	"3'(2'), 5'-bisphosphate nucleotidase 1"	NA	NA	NM_171990	NA	NA	NA	NA_x000D_
RAT17717	6.051	P	4.70843	A	2.53604	2.53604	up	0	RAT17717	0	mRNA	Nlrp1b	"NLR family, pyrin domain containing 1B"	NA	NA	XM_001080760	NA	NA	NA	NA_x000D_
RAT16716	5.71118	P	4.65111	A	2.08504	2.08504	up	0	RAT16716	0	mRNA	Fn3k	fructosamine 3 kinase	NA	NA	NM_001109051	NA	NA	NA	NA_x000D_
RAT28944	8.96682	P	7.66352	P	2.46793	2.46793	up	0	RAT28944	0	mRNA	Slco4a1	"solute carrier organic anion transporter family, member 4a1"	NA	NA	NM_133608	NA	NA	NA	NA_x000D_
RAT10887	6.7063	P	8.29409	P	0.332681	3.00588	down	0	RAT10887	0	mRNA	Kcnk5	"potassium channel, subfamily K, member 5"	NA	NA	NM_001039516	NA	NA	NA	NA_x000D_
RAT11427	8.87719	P	10.8861	P	0.248469	4.02465	down	0	RAT11427	0	mRNA	Tbc1d2b	"TBC1 domain family, member 2B"	NA	NA	NM_001108175	NA	NA	NA	NA_x000D_
RAT04498	13.5342	P	12.1382	P	2.63158	2.63158	up	0	RAT04498	0	mRNA	Hexb	hexosaminidase B	NA	NA	NM_001011946	NA	NA	NA	NA_x000D_
RAT03834	7.69356	P	6.31946	P	2.59206	2.59206	up	0	RAT03834	0	mRNA	Uxs1	UDP-glucuronate decarboxylase 1	NA	NA	NM_139336	NA	NA	NA	NA_x000D_
RAT01700	6.20782	P	7.85505	P	0.319253	3.13231	down	0	RAT01700	0	mRNA	Mustn1	"musculoskeletal, embryonic nuclear protein 1"	NA	NA	NM_181368	NA	NA	NA	NA_x000D_
RAT21274	5.8781	P	4.11982	A	3.38295	3.38295	up	0	RAT21274	0	mRNA	NA	NA	NA	NA	NA	NA	NA	NA	NA_x000D_
RAT26696	5.99715	P	3.64358	A	5.11089	5.11089	up	0	RAT26696	0	mRNA	Hpn	hepsin	NA	NA	NM_017112	NA	NA	NA	NA_x000D_
RAT30232	5.01375	A	6.14788	P	0.455608	2.19487	down	0	RAT30232	0	mRNA	Lipe	"lipase, hormone sensitive"	NA	NA	NM_012859	NA	NA	NA	NA_x000D_
RAT13518	7.22177	P	5.51333	P	3.26807	3.26807	up	0	RAT13518	0	mRNA	Hepacam2	HEPACAM family member 2	NA	NA	NM_001106580	NA	NA	NA	NA_x000D_
RAT14043	9.1625	P	10.3045	P	0.453126	2.20689	down	0	RAT14043	0	mRNA	Theg	testicular haploid expressed gene	NA	NA	NM_001013102	NA	NA	NA	NA_x000D_
RAT05660	6.2233	P	4.89785	A	2.50611	2.50611	up	0	RAT05660	0	mRNA	Kremen1	kringle containing transmembrane protein 1	NA	NA	NM_053649	NA	NA	NA	NA_x000D_
RAT14744	5.03774	A	6.30412	P	0.4157	2.40558	down	0	RAT14744	0	mRNA	LOC691414	hypothetical protein LOC691414	NA	NA	ENSRNOT00000045621	NA	NA	NA	NA_x000D_
RAT14094	8.56567	P	9.8599	P	0.407754	2.45246	down	0	RAT14094	0	mRNA	Rsph9	radial spoke head 9 homolog (Chlamydomonas)	NA	NA	NM_001108205	NA	NA	NA	NA_x000D_
RAT14594	6.95383	P	5.88636	P	2.09576	2.09576	up	0	RAT14594	0	mRNA	Etaa1	Ewing tumor-associated antigen 1	NA	NA	NM_001109094	NA	NA	NA	NA_x000D_
RAT02077	11.6585	P	13.5562	P	0.268356	3.72639	down	0	RAT02077	0	mRNA	Anxa1	annexin A1	NA	NA	NM_012904	NA	NA	NA	NA_x000D_
RAT06695	2.64706	A	5.50738	P	0.137708	7.26174	down	0	RAT06695	0	mRNA	Kng2	kininogen 2	NA	NA	NM_012741	NA	NA	NA	NA_x000D_
RAT14765	7.27391	P	5.57296	P	3.25117	3.25117	up	0	RAT14765	0	mRNA	NA	NA	NA	NA	TC591683	NA	NA	NA	NA_x000D_
RAT03578	10.8532	P	9.44113	P	2.66112	2.66112	up	0	RAT03578	0	mRNA	Steap1	six transmembrane epithelial antigen of the prostate 1	NA	NA	NM_001106629	NA	NA	NA	NA_x000D_
RAT25767	7.94419	P	6.92346	P	2.02895	2.02895	up	0	RAT25767	0	mRNA	NA	NA	NA	NA	FQ212370	NA	NA	NA	NA_x000D_
RAT07719	8.15348	P	9.9569	P	0.286494	3.49047	down	0	RAT07719	0	mRNA	NA	NA	NA	NA	NA	NA	NA	NA	NA_x000D_
RAT17248	10.2776	P	11.299	P	0.492653	2.02983	down	0	RAT17248	0	mRNA	NA	NA	NA	NA	NA	NA	NA	NA	NA_x000D_
RAT06910	7.2855	P	5.71351	P	2.97316	2.97316	up	0	RAT06910	0	mRNA	LOC685888	hypothetical protein LOC685888	NA	NA	XR_085909	NA	NA	NA	NA_x000D_
RAT00459	5.66807	P	2.71909	A	7.72203	7.72203	up	0	RAT00459	0	mRNA	Myoc	myocilin	NA	NA	NM_030865	NA	NA	NA	NA_x000D_
RAT24163	9.99985	P	11.3965	P	0.379799	2.63297	down	0	RAT24163	0	mRNA	NA	NA	NA	NA	NA	NA	NA	NA	NA_x000D_
RAT10483	5.9753	P	4.58111	A	2.62841	2.62841	up	0	RAT10483	0	mRNA	RGD1561145	similar to novel protein	NA	NA	NM_001134605	NA	NA	NA	NA_x000D_
RAT23620	4.60689	A	5.75813	P	0.450239	2.22104	down	0	RAT23620	0	mRNA	NA	NA	NA	NA	NA	NA	NA	NA	NA_x000D_
RAT05471	5.96488	P	4.68343	A	2.43084	2.43084	up	0	RAT05471	0	mRNA	Tmem30b	transmembrane protein 30B	NA	NA	NM_001080380	NA	NA	NA	NA_x000D_
RAT14046	10.5713	P	12.3369	P	0.294095	3.40026	down	0	RAT14046	0	mRNA	NA	NA	NA	NA	NA	NA	NA	NA	NA_x000D_
RAT30057	6.37986	P	4.40956	A	3.9185	3.9185	up	0	RAT30057	0	mRNA	Gzmc	granzyme C	NA	NA	NM_134332	NA	NA	NA	NA_x000D_
RAT18045	7.71672	P	6.69546	P	2.02969	2.02969	up	0	RAT18045	0	mRNA	Nt5c3	"5'-nucleotidase, cytosolic III"	NA	NA	NM_001107862	NA	NA	NA	NA_x000D_
RAT22347	5.55164	P	7.06687	P	0.34984	2.85845	down	0	RAT22347	0	mRNA	Col12a1	"collagen, type XII, alpha 1"	NA	NA	ENSRNOT00000051159	NA	NA	NA	NA_x000D_
RAT00948	6.49072	P	8.27128	P	0.291071	3.43559	down	0	RAT00948	0	mRNA	Pcsk6	proprotein convertase subtilisin/kexin type 6	NA	NA	NM_012999	NA	NA	NA	NA_x000D_
RAT12032	5.8706	P	4.21	A	3.16149	3.16149	up	0	RAT12032	0	mRNA	NA	NA	NA	NA	ENSRNOT00000017748	NA	NA	NA	NA_x000D_
RAT01754	8.27256	P	9.57089	P	0.406596	2.45944	down	0	RAT01754	0	mRNA	Cfh	complement factor H	NA	NA	NM_130409	NA	NA	NA	NA_x000D_
RAT06852	9.82797	P	10.855	P	0.490731	2.03778	down	0	RAT06852	0	mRNA	Maged2	"melanoma antigen, family D, 2"	NA	NA	NM_080479	NA	NA	NA	NA_x000D_
RAT01492	7.84009	P	9.31557	P	0.359613	2.78077	down	0	RAT01492	0	mRNA	Lats2	large tumor suppressor 2	NA	NA	NM_001107267	NA	NA	NA	NA_x000D_
RAT12486	4.79966	A	5.88301	P	0.471932	2.11895	down	0	RAT12486	0	mRNA	Mybphl	myosin binding protein H-like	NA	NA	NM_001014042	NA	NA	NA	NA_x000D_
RAT03566	6.17549	P	4.96873	A	2.30818	2.30818	up	0	RAT03566	0	mRNA	NA	NA	NA	NA	ENSRNOT00000035058	NA	NA	NA	NA_x000D_
RAT17747	7.31149	P	8.52478	P	0.431283	2.31866	down	0	RAT17747	0	mRNA	LOC501302	hypothetical gene supported by BC082068	NA	NA	XM_576715	NA	NA	NA	NA_x000D_
RAT10651	6.75233	P	5.57673	P	2.25887	2.25887	up	0	RAT10651	0	mRNA	NA	NA	NA	NA	TC621439	NA	NA	NA	NA_x000D_
RAT22117	8.26134	P	9.27028	P	0.496911	2.01243	down	0	RAT22117	0	mRNA	Nrg4	neuregulin 4	NA	NA	NM_001191109	NA	NA	NA	NA_x000D_
RAT27834	7.12971	P	8.57558	P	0.367072	2.72426	down	0	RAT27834	0	mRNA	NA	NA	NA	NA	ENSRNOT00000043494	NA	NA	NA	NA_x000D_
RAT25546	10.3358	P	9.24709	P	2.12684	2.12684	up	0	RAT25546	0	mRNA	Txndc17	thioredoxin domain containing 17	NA	NA	NM_001105805	NA	NA	NA	NA_x000D_
RAT18812	13.4947	P	14.7294	P	0.424926	2.35335	down	0	RAT18812	0	mRNA	NA	NA	NA	NA	NA	NA	NA	NA	NA_x000D_
RAT22352	7.26271	P	5.63187	P	3.09694	3.09694	up	0	RAT22352	0	mRNA	Hsd17b7	hydroxysteroid (17-beta) dehydrogenase 7	NA	NA	NM_017235	NA	NA	NA	NA_x000D_
RAT18994	8.09312	P	9.76432	P	0.313993	3.18479	down	0	RAT18994	0	mRNA	NA	NA	NA	NA	ENSRNOT00000050943	NA	NA	NA	NA_x000D_
RAT12758	5.82297	P	7.09228	P	0.414857	2.41047	down	0	RAT12758	0	mRNA	NA	NA	NA	NA	NA	NA	NA	NA	NA_x000D_
RAT09853	10.8397	P	12.6363	P	0.28784	3.47415	down	0	RAT09853	0	mRNA	Tbc1d20	"TBC1 domain family, member 20"	NA	NA	NM_001004281	NA	NA	NA	NA_x000D_
RAT16249	10.0219	P	11.7741	P	0.296848	3.36873	down	0	RAT16249	0	mRNA	Igfbp2	insulin-like growth factor binding protein 2	NA	NA	NM_013122	NA	NA	NA	NA_x000D_
RAT18099	5.33059	P	2.59811	A	6.64596	6.64596	up	0	RAT18099	0	mRNA	LOC498664	similar to hypothetical protein MGC35169	NA	NA	NM_001017508	NA	NA	NA	NA_x000D_
RAT17769	5.11926	A	7.656	P	0.172331	5.80278	down	0	RAT17769	0	mRNA	Dpp4	dipeptidylpeptidase 4	NA	NA	NM_012789	NA	NA	NA	NA_x000D_
RAT02291	12.6019	P	15.4278	P	0.141036	7.09038	down	0	RAT02291	0	mRNA	Msln	mesothelin	NA	NA	NM_031658	NA	NA	NA	NA_x000D_
RAT29863	5.88321	P	4.31777	A	2.95968	2.95968	up	0	RAT29863	0	mRNA	Kifc1	kinesin family member C1	NA	NA	NM_001005878	NA	NA	NA	NA_x000D_
RAT09538	7.41738	P	8.7008	P	0.410821	2.43415	down	0	RAT09538	0	mRNA	Trim44	tripartite motif-containing 44	NA	NA	NM_001013203	NA	NA	NA	NA_x000D_
RAT05979	6.70172	P	5.28394	A	2.67174	2.67174	up	0	RAT05979	0	mRNA	Pigc	"phosphatidylinositol glycan anchor biosynthesis, class C"	NA	NA	NM_001012207	NA	NA	NA	NA_x000D_
RAT15450	7.27851	P	8.77392	P	0.35468	2.81944	down	0	RAT15450	0	mRNA	NA	NA	NA	NA	TC590048	NA	NA	NA	NA_x000D_
RAT09542	7.04914	P	8.63378	P	0.333407	2.99934	down	0	RAT09542	0	mRNA	NA	NA	NA	NA	ENSRNOT00000043011	NA	NA	NA	NA_x000D_
RAT04683	6.01891	P	7.54603	P	0.346968	2.88211	down	0	RAT04683	0	mRNA	Hs6st1	heparan sulfate 6-O-sulfotransferase 1	NA	NA	NM_001108210	NA	NA	NA	NA_x000D_
RAT02071	10.4744	P	11.5724	P	0.467159	2.1406	down	0	RAT02071	0	mRNA	Sod3	"superoxide dismutase 3, extracellular"	NA	NA	NM_012880	NA	NA	NA	NA_x000D_
RAT11085	7.89656	P	6.72596	P	2.25105	2.25105	up	0	RAT11085	0	mRNA	NA	NA	NA	NA	NA	NA	NA	NA	NA_x000D_
RAT21373	4.70211	A	5.72124	P	0.493413	2.0267	down	0	RAT21373	0	mRNA	LOC685125	similar to RIKEN cDNA 5031410I06	NA	NA	BC166431	NA	NA	NA	NA_x000D_
RAT05468	8.8877	P	7.74418	P	2.2092	2.2092	up	0	RAT05468	0	mRNA	Tpst2	tyrosylprotein sulfotransferase 2	NA	NA	NM_001008508	NA	NA	NA	NA_x000D_
RAT05637	5.164	A	6.1812	P	0.494074	2.02399	down	0	RAT05637	0	mRNA	Prtfdc1	phosphoribosyl transferase domain containing 1	NA	NA	NM_001106127	NA	NA	NA	NA_x000D_
RAT07027	6.3457	P	7.61169	P	0.415813	2.40493	down	0	RAT07027	0	mRNA	NA	NA	NA	NA	ENSRNOT00000033073	NA	NA	NA	NA_x000D_
RAT03595	8.7709	P	9.90486	P	0.455663	2.1946	down	0	RAT03595	0	mRNA	Cdv3	carnitine deficiency-associated gene expressed in ventricle 3 homolog (mouse)	NA	NA	NM_001014097	NA	NA	NA	NA_x000D_
RAT23714	6.28011	P	8.17393	P	0.269093	3.71618	down	0	RAT23714	0	mRNA	Hoxc6	homeo box C6	NA	NA	XM_001069410	NA	NA	NA	NA_x000D_
RAT12481	4.50009	A	6.30881	P	0.285445	3.50331	down	0	RAT12481	0	mRNA	NA	NA	NA	NA	NA	NA	NA	NA	NA_x000D_
RAT06616	7.25382	P	6.0917	P	2.23785	2.23785	up	0	RAT06616	0	mRNA	Pvrl2	poliovirus receptor-related 2	NA	NA	NM_001012064	NA	NA	NA	NA_x000D_
RAT30029	7.75225	P	8.81819	P	0.477662	2.09353	down	0	RAT30029	0	mRNA	Rabif	RAB interacting factor	NA	NA	NM_001007678	NA	NA	NA	NA_x000D_
RAT08431	8.32316	P	7.15868	P	2.24151	2.24151	up	0	RAT08431	0	mRNA	Pgm3	phosphoglucomutase 3	NA	NA	BC166838	NA	NA	NA	NA_x000D_
RAT10172	4.4867	A	5.79943	P	0.402557	2.48412	down	0	RAT10172	0	mRNA	Gbp5	guanylate binding protein 5	NA	NA	NM_001108569	NA	NA	NA	NA_x000D_
RAT10799	7.5361	P	6.37106	P	2.24239	2.24239	up	0	RAT10799	0	mRNA	Tmem161b	transmembrane protein 161B	NA	NA	XM_226652	NA	NA	NA	NA_x000D_
RAT29416	8.74826	P	7.39147	P	2.56114	2.56114	up	0	RAT29416	0	mRNA	NA	NA	NA	NA	NA	NA	NA	NA	NA_x000D_
RAT11868	6.13847	P	7.51302	P	0.385674	2.59286	down	0	RAT11868	0	mRNA	LOC691728	similar to spermatogenesis associated glutamate (E)-rich protein 4d	NA	NA	XM_001079400	NA	NA	NA	NA_x000D_
RAT16672	3.06897	A	5.84606	P	0.145886	6.85466	down	0	RAT16672	0	mRNA	Cbln1	cerebellin 1 precursor	NA	NA	NM_001109127	NA	NA	NA	NA_x000D_
RAT28403	13.987	P	12.9226	P	2.09119	2.09119	up	0	RAT28403	0	mRNA	NA	NA	NA	NA	NA	NA	NA	NA	NA_x000D_
RAT15089	7.092	P	8.61765	P	0.347322	2.87917	down	0	RAT15089	0	mRNA	NA	NA	NA	NA	BC091362	NA	NA	NA	NA_x000D_
RAT03484	5.91564	P	4.86237	A	2.07522	2.07522	up	0	RAT03484	0	mRNA	Dnajc12	"DnaJ (Hsp40) homolog, subfamily C, member 12"	NA	NA	NM_001034032	NA	NA	NA	NA_x000D_
RAT07104	7.94265	P	6.69882	P	2.36827	2.36827	up	0	RAT07104	0	mRNA	RGD1308706	similar to RIKEN cDNA 4921524J17	NA	NA	NM_001134421	NA	NA	NA	NA_x000D_
RAT10394	8.78037	P	7.54706	P	2.35105	2.35105	up	0	RAT10394	0	mRNA	8-Mar	membrane-associated ring finger (C3HC4) 8	NA	NA	NM_001107882	NA	NA	NA	NA_x000D_
RAT05631	9.13802	P	7.93061	P	2.30922	2.30922	up	0	RAT05631	0	mRNA	Nt5e	"5' nucleotidase, ecto"	NA	NA	NM_021576	NA	NA	NA	NA_x000D_
RAT01883	10.1941	P	11.4255	P	0.425901	2.34797	down	0	RAT01883	0	mRNA	Rnaseh2a	"ribonuclease H2, subunit A"	NA	NA	NM_001013234	NA	NA	NA	NA_x000D_
RAT04926	9.46903	P	8.22986	P	2.36063	2.36063	up	0	RAT04926	0	mRNA	Ttyh3	tweety homolog 3 (Drosophila)	NA	NA	NM_001107124	NA	NA	NA	NA_x000D_
RAT25184	6.45746	P	4.96709	A	2.80961	2.80961	up	0	RAT25184	0	mRNA	Myh13	"myosin, heavy chain 13, skeletal muscle"	NA	NA	ENSRNOT00000055257	NA	NA	NA	NA_x000D_
RAT21200	5.25926	P	6.90717	P	0.319103	3.13379	down	0	RAT21200	0	mRNA	Car13	carbonic anhydrase 13	NA	NA	NM_001134993	NA	NA	NA	NA_x000D_
RAT13081	12.0708	P	13.3632	P	0.408271	2.44935	down	0	RAT13081	0	mRNA	NA	NA	NA	NA	NA	NA	NA	NA	NA_x000D_
RAT25878	10.0646	P	11.6853	P	0.325177	3.07525	down	0	RAT25878	0	mRNA	NA	NA	NA	NA	NA	NA	NA	NA	NA_x000D_
RAT29740	5.19491	A	6.45014	P	0.418928	2.38704	down	0	RAT29740	0	mRNA	LOC691684	similar to MIC2 like 1	NA	NA	XM_001079259	NA	NA	NA	NA_x000D_
RAT02556	8.56647	P	10.0896	P	0.347923	2.8742	down	0	RAT02556	0	mRNA	Aatf	apoptosis antagonizing transcription factor	NA	NA	NM_053720	NA	NA	NA	NA_x000D_
RAT15802	7.75132	P	9.37313	P	0.324927	3.07762	down	0	RAT15802	0	mRNA	LOC689796	hypothetical protein LOC689796	NA	NA	XM_001072032	NA	NA	NA	NA_x000D_
RAT00323	6.2221	P	7.48234	P	0.417474	2.39536	down	0	RAT00323	0	mRNA	RGD1310587	similar to hypothetical protein FLJ14146	NA	NA	NM_001100857	NA	NA	NA	NA_x000D_
RAT18256	9.22526	P	10.4507	P	0.427665	2.33828	down	0	RAT18256	0	mRNA	Tmbim1	transmembrane BAX inhibitor motif containing 1	NA	NA	NM_001007713	NA	NA	NA	NA_x000D_
RAT24530	12.8772	P	14.0092	P	0.456275	2.19166	down	0	RAT24530	0	mRNA	Tnp1	transition protein 1	NA	NA	NM_017056	NA	NA	NA	NA_x000D_
RAT11740	6.70837	P	8.25579	P	0.342121	2.92294	down	0	RAT11740	0	mRNA	Siat7F	sialyltransferase 7F	NA	NA	NM_001015036	NA	NA	NA	NA_x000D_
RAT18272	6.71066	P	7.97879	P	0.415197	2.40849	down	0	RAT18272	0	mRNA	Cetn4	centrin 4	NA	NA	ENSRNOT00000065384	NA	NA	NA	NA_x000D_
RAT00428	7.77451	P	6.62664	P	2.21586	2.21586	up	0	RAT00428	0	mRNA	Ppp2r3a	"protein phosphatase 2, regulatory subunit B'', alpha"	NA	NA	NM_001012202	NA	NA	NA	NA_x000D_
RAT01325	9.20906	P	11.0632	P	0.276594	3.61541	down	0	RAT01325	0	mRNA	Selm	selenoprotein M	NA	NA	NM_001115013	NA	NA	NA	NA_x000D_
RAT03780	6.71638	P	5.28497	A	2.6971	2.6971	up	0	RAT03780	0	mRNA	Cma1	"chymase 1, mast cell"	NA	NA	NM_013092	NA	NA	NA	NA_x000D_
RAT26894	7.99266	P	6.77059	P	2.33282	2.33282	up	0	RAT26894	0	mRNA	NA	NA	NA	NA	NA	NA	NA	NA	NA_x000D_
RAT05292	7.44973	P	8.5497	P	0.466527	2.1435	down	0	RAT05292	0	mRNA	Taok1	TAO kinase 1	NA	NA	NM_173327	NA	NA	NA	NA_x000D_
RAT02991	10.3282	P	11.7985	P	0.360906	2.77081	down	0	RAT02991	0	mRNA	RGD1306625	LOC360508	NA	NA	NM_001108271	NA	NA	NA	NA_x000D_
RAT10041	5.46517	P	6.76743	P	0.40549	2.46615	down	0	RAT10041	0	mRNA	Ptprs	"protein tyrosine phosphatase, receptor type, S"	NA	NA	NM_019140	NA	NA	NA	NA_x000D_
RAT15010	7.37345	P	4.43872	A	7.64613	7.64613	up	0	RAT15010	0	mRNA	Pate4	prostate and testis expressed 4	NA	NA	NM_001108757	NA	NA	NA	NA_x000D_
RAT00362	9.60667	P	8.47685	P	2.18831	2.18831	up	0	RAT00362	0	mRNA	Sdhc	"succinate dehydrogenase complex, subunit C, integral membrane protein"	NA	NA	NM_001005534	NA	NA	NA	NA_x000D_
RAT09632	5.84443	P	7.50515	P	0.316279	3.16176	down	0	RAT09632	0	mRNA	Ddx31	DEAD (Asp-Glu-Ala-Asp) box polypeptide 31	NA	NA	NM_001107824	NA	NA	NA	NA_x000D_
RAT08798	5.82948	P	4.57019	A	2.39378	2.39378	up	0	RAT08798	0	mRNA	Jag1	jagged 1	NA	NA	NM_019147	NA	NA	NA	NA_x000D_
RAT02668	7.54972	P	6.47634	P	2.10435	2.10435	up	0	RAT02668	0	mRNA	Atp5g3	"ATP synthase, H+ transporting, mitochondrial Fo complex, subunit C3 (subunit 9)"	NA	NA	NM_053756	NA	NA	NA	NA_x000D_
RAT24984	2.88573	A	6.03147	P	0.11299	8.85037	down	0	RAT24984	0	mRNA	NA	NA	NA	NA	NA	NA	NA	NA	NA_x000D_
RAT10750	5.48896	P	4.2396	A	2.37735	2.37735	up	0	RAT10750	0	mRNA	Zfyve20	"zinc finger, FYVE domain containing 20"	NA	NA	NM_001107875	NA	NA	NA	NA_x000D_
RAT02577	11.147	P	10.0615	P	2.12208	2.12208	up	0	RAT02577	0	mRNA	RGD1305045	similar to hypothetical protein	NA	NA	NM_001106496	NA	NA	NA	NA_x000D_
RAT19277	5.39803	P	7.72091	P	0.199868	5.0033	down	0	RAT19277	0	mRNA	Fosl2	fos-like antigen 2	NA	NA	NM_012954	NA	NA	NA	NA_x000D_
RAT09278	13.1426	P	11.709	P	2.7012	2.7012	up	0	RAT09278	0	mRNA	RGD1565459	similar to ribosomal protein L10a	NA	NA	ENSRNOT00000042056	NA	NA	NA	NA_x000D_
RAT25353	9.16414	P	7.89253	P	2.41432	2.41432	up	0	RAT25353	0	mRNA	Psapl1	prosaposin-like 1	NA	NA	NM_001144850	NA	NA	NA	NA_x000D_
RAT03745	9.12118	P	7.95684	P	2.24131	2.24131	up	0	RAT03745	0	mRNA	C1galt1c1	C1GALT1-specific chaperone 1	NA	NA	NM_001030033	NA	NA	NA	NA_x000D_
RAT10791	10.5411	P	11.9966	P	0.364617	2.7426	down	0	RAT10791	0	mRNA	Iqcf1	IQ motif containing F1	NA	NA	NM_001109361	NA	NA	NA	NA_x000D_
RAT10493	7.20957	P	8.77214	P	0.338548	2.95379	down	0	RAT10493	0	mRNA	Etv5	ets variant 5	NA	NA	NM_001107082	NA	NA	NA	NA_x000D_
RAT28578	7.28499	P	5.3201	P	3.90381	3.90381	up	0	RAT28578	0	mRNA	Mcpt10	mast cell protease 10	NA	NA	NM_017146	NA	NA	NA	NA_x000D_
RAT10153	6.87136	P	8.31605	P	0.367371	2.72205	down	0	RAT10153	0	mRNA	Lamb2	"laminin, beta 2"	NA	NA	NM_012974	NA	NA	NA	NA_x000D_
RAT19296	10.0147	P	12.043	P	0.245139	4.07932	down	0	RAT19296	0	mRNA	MGC112715	hypothetical protein LOC690899	NA	NA	NM_001044300	NA	NA	NA	NA_x000D_
RAT11911	5.9614	P	7.58284	P	0.325012	3.07681	down	0	RAT11911	0	mRNA	NA	NA	NA	NA	ENSRNOT00000042443	NA	NA	NA	NA_x000D_
RAT07071	6.05826	P	4.95503	A	2.14835	2.14835	up	0	RAT07071	0	mRNA	Fam91a1	"family with sequence similarity 91, member A1"	NA	NA	NM_001127578	NA	NA	NA	NA_x000D_
RAT12271	7.41586	P	4.45876	A	7.76561	7.76561	up	0	RAT12271	0	mRNA	NA	NA	NA	NA	ENSRNOT00000033412	NA	NA	NA	NA_x000D_
RAT28714	4.92924	A	7.01702	P	0.235242	4.25094	down	0	RAT28714	0	mRNA	LOC680799	hypothetical protein LOC680799	NA	NA	NM_001163519	NA	NA	NA	NA_x000D_
RAT21665	7.10573	P	8.50518	P	0.379074	2.63801	down	0	RAT21665	0	mRNA	Efemp2	EGF-containing fibulin-like extracellular matrix protein 2	NA	NA	NM_001005907	NA	NA	NA	NA_x000D_
RAT18301	6.72797	P	8.06532	P	0.395749	2.52686	down	0	RAT18301	0	mRNA	NA	NA	NA	NA	ENSRNOT00000040473	NA	NA	NA	NA_x000D_
RAT02802	3.91145	A	5.35347	P	0.368052	2.717	down	0	RAT02802	0	mRNA	Col4a3	"collagen, type IV, alpha 3"	NA	NA	NM_001135759	NA	NA	NA	NA_x000D_
RAT02739	11.6806	P	10.6667	P	2.0194	2.0194	up	0	RAT02739	0	mRNA	Tpmt	thiopurine S-methyltransferase	NA	NA	ENSRNOT00000022085	NA	NA	NA	NA_x000D_
RAT29926	8.50144	P	7.49551	P	2.00824	2.00824	up	0	RAT29926	0	mRNA	Tbrg1	transforming growth factor beta regulator 1	NA	NA	NM_001009344	NA	NA	NA	NA_x000D_
RAT23574	5.47613	P	2.54112	A	7.64762	7.64762	up	0	RAT23574	0	mRNA	Defa11	defensin alpha 11	NA	NA	NM_001033078	NA	NA	NA	NA_x000D_
RAT18700	7.49387	P	9.01253	P	0.349009	2.86526	down	0	RAT18700	0	mRNA	Bgn	biglycan	NA	NA	NM_017087	NA	NA	NA	NA_x000D_
RAT29117	8.94735	P	7.93711	P	2.01424	2.01424	up	0	RAT29117	0	mRNA	Strbp	spermatid perinuclear RNA binding protein	NA	NA	NM_053416	NA	NA	NA	NA_x000D_
RAT02831	7.84199	P	6.80288	P	2.05496	2.05496	up	0	RAT02831	0	mRNA	RGD1559786	similar to RIKEN cDNA 0610037L13	NA	NA	NM_001034132	NA	NA	NA	NA_x000D_
RAT14446	10.0331	P	8.72651	P	2.47359	2.47359	up	0	RAT14446	0	mRNA	Hacl1	2-hydroxyacyl-CoA lyase 1	NA	NA	NM_053493	NA	NA	NA	NA_x000D_
RAT12911	4.94595	A	6.35598	P	0.376304	2.65743	down	0	RAT12911	0	mRNA	NA	NA	NA	NA	NA	NA	NA	NA	NA_x000D_
RAT02280	6.93228	P	9.20687	P	0.206671	4.83861	down	0	RAT02280	0	mRNA	Ptgis	prostaglandin I2 (prostacyclin) synthase	NA	NA	NM_031557	NA	NA	NA	NA_x000D_
RAT06168	4.22376	A	5.90647	P	0.311498	3.21029	down	0	RAT06168	0	mRNA	Stx1b	syntaxin 1B	NA	NA	ENSRNOT00000026063	NA	NA	NA	NA_x000D_
RAT24485	4.19508	A	5.36066	P	0.445784	2.24324	down	0	RAT24485	0	mRNA	Myo7b	myosin VIIb	NA	NA	ENSRNOT00000021405	NA	NA	NA	NA_x000D_
RAT13902	8.18558	P	9.87415	P	0.310234	3.22337	down	0	RAT13902	0	mRNA	NA	NA	NA	NA	ENSRNOT00000044801	NA	NA	NA	NA_x000D_
RAT03635	13.1082	P	15.5989	P	0.177917	5.6206	down	0	RAT03635	0	mRNA	Timp2	TIMP metallopeptidase inhibitor 2	NA	NA	NM_021989	NA	NA	NA	NA_x000D_
RAT21227	7.72254	P	9.47156	P	0.297504	3.3613	down	0	RAT21227	0	mRNA	Kif1c	kinesin family member 1C	NA	NA	NM_145877	NA	NA	NA	NA_x000D_
RAT04304	7.48021	P	6.06499	P	2.66699	2.66699	up	0	RAT04304	0	mRNA	Mrpl50	mitochondrial ribosomal protein L50	NA	NA	NM_001108665	NA	NA	NA	NA_x000D_
RAT02548	9.79036	P	8.42216	P	2.5815	2.5815	up	0	RAT02548	0	mRNA	Pou2af1	POU class 2 associating factor 1	NA	NA	NM_001109599	NA	NA	NA	NA_x000D_
RAT28770	4.78962	A	6.48316	P	0.309169	3.23448	down	0	RAT28770	0	mRNA	Slc38a11	"solute carrier family 38, member 11"	NA	NA	ENSRNOT00000058962	NA	NA	NA	NA_x000D_
RAT01080	11.638	P	10.5212	P	2.16868	2.16868	up	0	RAT01080	0	mRNA	Acp1	"acid phosphatase 1, soluble"	NA	NA	NM_021262	NA	NA	NA	NA_x000D_
RAT29372	5.9604	P	7.25984	P	0.406284	2.46133	down	0	RAT29372	0	mRNA	NA	NA	NA	NA	ENSRNOT00000059953	NA	NA	NA	NA_x000D_
RAT00309	9.50031	P	11.928	P	0.185862	5.38033	down	0	RAT00309	0	mRNA	Emp3	epithelial membrane protein 3	NA	NA	NM_030847	NA	NA	NA	NA_x000D_
RAT08450	6.95162	P	5.69292	P	2.3928	2.3928	up	0	RAT08450	0	mRNA	RGD1307704	similar to RIKEN cDNA 2410016O06	NA	NA	NM_001108040	NA	NA	NA	NA_x000D_
A_43_P14304	5.95584	P	4.55363	A	2.64306	2.64306	up	0	A_43_P14304	0	mRNA	NA	NA	NA	NA	TC598318	NA	NA	NA	NA_x000D_
RAT06559	6.05561	P	4.70235	A	2.55489	2.55489	up	0	RAT06559	0	mRNA	Caps2	calcyphosine 2	NA	NA	NM_001108990	NA	NA	NA	NA_x000D_
RAT19295	9.5855	P	7.58396	P	4.00428	4.00428	up	0	RAT19295	0	mRNA	Cryl1	"crystallin, lambda 1"	NA	NA	NM_175757	NA	NA	NA	NA_x000D_
RAT27782	6.49433	P	3.17579	A	9.9765	9.9765	up	0	RAT27782	0	mRNA	Ghrhr	growth hormone releasing hormone receptor	NA	NA	NM_012850	NA	NA	NA	NA_x000D_
RAT14626	8.38261	P	9.62471	P	0.422756	2.36543	down	0	RAT14626	0	mRNA	RGD1565390	similar to putative protein kinase	NA	NA	XM_344843	NA	NA	NA	NA_x000D_
RAT00432	6.40458	P	5.36596	P	2.05427	2.05427	up	0	RAT00432	0	mRNA	Tmem33	transmembrane protein 33	NA	NA	NM_021671	NA	NA	NA	NA_x000D_
RAT17213	5.74128	P	4.54608	A	2.28976	2.28976	up	0	RAT17213	0	mRNA	Dph2	DPH2 homolog (S. cerevisiae)	NA	NA	NM_001015007	NA	NA	NA	NA_x000D_
RAT26397	4.16659	A	5.81946	P	0.318008	3.14457	down	0	RAT26397	0	mRNA	Palm	paralemmin	NA	NA	NM_130829	NA	NA	NA	NA_x000D_
RAT22345	5.84788	P	7.50186	P	0.317764	3.14699	down	0	RAT22345	0	mRNA	Col14a1	"collagen, type XIV, alpha 1"	NA	NA	NM_001130548	NA	NA	NA	NA_x000D_
RAT06371	5.85733	P	7.05309	P	0.436557	2.29065	down	0	RAT06371	0	mRNA	NA	NA	NA	NA	FQ227170	NA	NA	NA	NA_x000D_
RAT08742	5.9374	P	7.19415	P	0.418485	2.38957	down	0	RAT08742	0	mRNA	Ttc12	tetratricopeptide repeat domain 12	NA	NA	NM_001004246	NA	NA	NA	NA_x000D_
RAT10501	9.61779	P	7.75063	P	3.64814	3.64814	up	0	RAT10501	0	mRNA	Cd177	CD177 molecule	NA	NA	NM_001191948	NA	NA	NA	NA_x000D_
RAT15165	9.58338	P	12.2959	P	0.152565	6.5546	down	0	RAT15165	0	mRNA	RGD1311849	similar to mKIAA1797 protein	NA	NA	ENSRNOT00000058387	NA	NA	NA	NA_x000D_
RAT03781	11.1312	P	12.1356	P	0.498478	2.0061	down	0	RAT03781	0	mRNA	NA	NA	NA	NA	AW917596	NA	NA	NA	NA_x000D_
RAT16527	5.47227	P	6.99572	P	0.347852	2.87479	down	0	RAT16527	0	mRNA	NA	NA	NA	NA	ENSRNOT00000036078	NA	NA	NA	NA_x000D_
RAT23715	2.62049	A	5.51087	P	0.134869	7.41463	down	0	RAT23715	0	mRNA	NA	NA	NA	NA	ENSRNOT00000022217	NA	NA	NA	NA_x000D_
RAT03888	8.04109	P	9.87816	P	0.27989	3.57283	down	0	RAT03888	0	mRNA	Col22a1	"collagen, type XXII, alpha 1"	NA	NA	XM_243609	NA	NA	NA	NA_x000D_
RAT11432	6.40221	P	5.33608	P	2.09381	2.09381	up	0	RAT11432	0	mRNA	Rabl3	"RAB, member of RAS oncogene family-like 3"	NA	NA	NM_001108319	NA	NA	NA	NA_x000D_
RAT14211	6.09156	P	7.36424	P	0.413891	2.4161	down	0	RAT14211	0	mRNA	NA	NA	NA	NA	TC622511	NA	NA	NA	NA_x000D_
RAT23716	4.35312	A	5.92047	P	0.337428	2.9636	down	0	RAT23716	0	mRNA	Hoxc4	homeo box C4	NA	NA	NM_001109884	NA	NA	NA	NA_x000D_
RAT21417	9.34557	P	10.3996	P	0.481623	2.07631	down	0	RAT21417	0	mRNA	Prr22	proline rich 22	NA	NA	NM_001126375	NA	NA	NA	NA_x000D_
RAT18964	4.89584	A	6.31239	P	0.374607	2.66946	down	0	RAT18964	0	mRNA	Ccdc39	coiled-coil domain containing 39	NA	NA	NM_001107667	NA	NA	NA	NA_x000D_
RAT10807	8.60332	P	7.28312	P	2.49702	2.49702	up	0	RAT10807	0	mRNA	Vav3	vav 3 guanine nucleotide exchange factor	NA	NA	NM_001191714	NA	NA	NA	NA_x000D_
RAT01689	4.07102	A	5.48382	P	0.37558	2.66255	down	0	RAT01689	0	mRNA	Tmeff2	transmembrane protein with EGF-like and two follistatin-like domains 2	NA	NA	NM_001108795	NA	NA	NA	NA_x000D_
RAT26981	11.2546	P	12.5313	P	0.412737	2.42285	down	0	RAT26981	0	mRNA	Bspry	B-box and SPRY domain containing	NA	NA	NM_022261	NA	NA	NA	NA_x000D_
RAT00827	7.05198	P	8.09183	P	0.486378	2.05601	down	0	RAT00827	0	mRNA	Wfdc1	WAP four-disulfide core domain 1	NA	NA	NM_133581	NA	NA	NA	NA_x000D_
RAT15208	11.2567	P	10.2067	P	2.07055	2.07055	up	0	RAT15208	0	mRNA	RGD1563216	similar to HESB like domain containing 1	NA	NA	NM_001109278	NA	NA	NA	NA_x000D_
RAT15175	7.08752	P	8.893	P	0.286085	3.49546	down	0	RAT15175	0	mRNA	LOC363306	hypothetical protein LOC363306	NA	NA	XM_001068086	NA	NA	NA	NA_x000D_
RAT26443	6.90163	P	5.62332	P	2.42554	2.42554	up	0	RAT26443	0	mRNA	Sema4d	"sema domain, immunoglobulin domain (Ig), transmembrane domain (TM) and short cytoplasmic domain, (semaphorin) 4D"	NA	NA	NM_001170563	NA	NA	NA	NA_x000D_
RAT27593	8.82284	P	9.92818	P	0.464792	2.1515	down	0	RAT27593	0	mRNA	Fam5b	"family with sequence similarity 5, member B"	NA	NA	NM_173115	NA	NA	NA	NA_x000D_
RAT14978	8.22395	P	9.33097	P	0.464251	2.15401	down	0	RAT14978	0	mRNA	Cd276	Cd276 molecule	NA	NA	NM_182824	NA	NA	NA	NA_x000D_
RAT25580	7.96684	P	9.08322	P	0.461247	2.16804	down	0	RAT25580	0	mRNA	Slc7a8	"solute carrier family 7 (amino acid transporter light chain, L system), member 8"	NA	NA	NM_053442	NA	NA	NA	NA_x000D_
RAT27180	4.86084	A	6.15299	P	0.408342	2.44893	down	0	RAT27180	0	mRNA	NA	NA	NA	NA	ENSRNOT00000059954	NA	NA	NA	NA_x000D_
RAT25636	9.2308	P	10.7658	P	0.345083	2.89786	down	0	RAT25636	0	mRNA	Alpi	"alkaline phosphatase, intestinal"	NA	NA	NM_022665	NA	NA	NA	NA_x000D_
RAT06761	8.04409	P	9.84169	P	0.287653	3.47641	down	0	RAT06761	0	mRNA	Ccdc63	coiled-coil domain containing 63	NA	NA	NM_001025665	NA	NA	NA	NA_x000D_
RAT28189	8.7236	P	7.3494	P	2.59224	2.59224	up	0	RAT28189	0	mRNA	NA	NA	NA	NA	ENSRNOT00000036860	NA	NA	NA	NA_x000D_
RAT04602	9.11018	P	10.6082	P	0.354051	2.82445	down	0	RAT04602	0	mRNA	Tmem176b	transmembrane protein 176B	NA	NA	NM_134390	NA	NA	NA	NA_x000D_
RAT12059	5.80553	P	4.53163	A	2.41815	2.41815	up	0	RAT12059	0	mRNA	NA	NA	NA	NA	NA	NA	NA	NA	NA_x000D_
RAT20473	6.20411	P	7.3343	P	0.456855	2.18888	down	0	RAT20473	0	mRNA	LOC680913	hypothetical protein LOC680913	NA	NA	ENSRNOT00000060742	NA	NA	NA	NA_x000D_
RAT26390	9.43979	P	10.7051	P	0.416007	2.40381	down	0	RAT26390	0	mRNA	Dyrk1b	dual-specificity tyrosine-(Y)-phosphorylation regulated kinase 1b	NA	NA	NM_001107496	NA	NA	NA	NA_x000D_
RAT26630	11.688	P	10.6865	P	2.00209	2.00209	up	0	RAT26630	0	mRNA	Defb42	defensin beta 42	NA	NA	NM_001037532	NA	NA	NA	NA_x000D_
RAT15004	6.23158	P	4.90963	A	2.50004	2.50004	up	0	RAT15004	0	mRNA	NA	NA	NA	NA	NA	NA	NA	NA	NA_x000D_
RAT10207	5.14294	A	6.43707	P	0.407782	2.45229	down	0	RAT10207	0	mRNA	41529	septin 12	NA	NA	NM_001100865	NA	NA	NA	NA_x000D_
RAT02094	9.50916	P	8.36069	P	2.21678	2.21678	up	0	RAT02094	0	mRNA	Ppp1cb	"protein phosphatase 1, catalytic subunit, beta isozyme"	NA	NA	NM_013065	NA	NA	NA	NA_x000D_
RAT01851	7.74653	P	6.61863	P	2.18541	2.18541	up	0	RAT01851	0	mRNA	Pdcd2	programmed cell death 2	NA	NA	NM_031638	NA	NA	NA	NA_x000D_
RAT22087	6.89081	P	8.39271	P	0.35309	2.83214	down	0	RAT22087	0	mRNA	Sdc4	syndecan 4	NA	NA	NM_012649	NA	NA	NA	NA_x000D_
RAT24649	12.8095	P	13.9284	P	0.460441	2.17183	down	0	RAT24649	0	mRNA	Odf2	outer dense fiber of sperm tails 2	NA	NA	NM_017213	NA	NA	NA	NA_x000D_
RAT00515	7.48363	P	5.92117	P	2.95357	2.95357	up	0	RAT00515	0	mRNA	Gmcl1	germ cell-less homolog 1 (Drosophila)	NA	NA	NM_001033931	NA	NA	NA	NA_x000D_
RAT01187	8.50698	P	7.46193	P	2.06344	2.06344	up	0	RAT01187	0	mRNA	Cmtm8	CKLF-like MARVEL transmembrane domain containing 8	NA	NA	NM_198754	NA	NA	NA	NA_x000D_
RAT05544	7.91243	P	6.73707	P	2.2585	2.2585	up	0	RAT05544	0	mRNA	Aga	aspartylglucosaminidase	NA	NA	NM_001031641	NA	NA	NA	NA_x000D_
RAT02988	7.02181	P	8.58581	P	0.338211	2.95673	down	0	RAT02988	0	mRNA	LOC684560	hypothetical protein LOC684560	NA	NA	XM_001070979	NA	NA	NA	NA_x000D_
RAT29311	7.4591	P	6.35145	P	2.15493	2.15493	up	0	RAT29311	0	mRNA	ST7	suppression of tumorigenicity 7	NA	NA	NM_001004102	NA	NA	NA	NA_x000D_
RAT07399	10.3537	P	8.94581	P	2.65346	2.65346	up	0	RAT07399	0	mRNA	Glb1	"galactosidase, beta 1"	NA	NA	NM_001108192	NA	NA	NA	NA_x000D_
RAT26115	5.92996	P	8.18012	P	0.210201	4.75735	down	0	RAT26115	0	mRNA	Tgfbr2	"transforming growth factor, beta receptor II"	NA	NA	NM_031132	NA	NA	NA	NA_x000D_
RAT29626	9.34213	P	10.5071	P	0.445963	2.24234	down	0	RAT29626	0	mRNA	NA	NA	NA	NA	NA	NA	NA	NA	NA_x000D_
RAT25790	7.73913	P	9.29458	P	0.340222	2.93926	down	0	RAT25790	0	mRNA	NA	NA	NA	NA	TC592722	NA	NA	NA	NA_x000D_
RAT05151	7.65115	P	8.66917	P	0.493792	2.02514	down	0	RAT05151	0	mRNA	Klk1c2	kallikrein 1-related peptidase C2	NA	NA	NM_012677	NA	NA	NA	NA_x000D_
RAT15666	7.15409	P	8.20817	P	0.481606	2.07639	down	0	RAT15666	0	mRNA	Nrep	neuronal regeneration related protein	NA	NA	NM_178096	NA	NA	NA	NA_x000D_
RAT12603	6.80697	P	5.39358	P	2.66362	2.66362	up	0	RAT12603	0	mRNA	Tmcc2	transmembrane and coiled-coil domain family 2	NA	NA	ENSRNOT00000000036	NA	NA	NA	NA_x000D_
RAT04924	6.43271	P	4.87891	A	2.93589	2.93589	up	0	RAT04924	0	mRNA	Tmem220	transmembrane protein 220	NA	NA	ENSRNOT00000004516	NA	NA	NA	NA_x000D_
RAT10892	4.46916	A	6.01406	P	0.34272	2.91783	down	0	RAT10892	0	mRNA	Ypel4	yippee-like 4 (Drosophila)	NA	NA	NM_001024369	NA	NA	NA	NA_x000D_
RAT04284	6.09353	P	4.45861	A	3.10571	3.10571	up	0	RAT04284	0	mRNA	Slc12a9	"solute carrier family 12 (potassium/chloride transporters), member 9"	NA	NA	NM_134405	NA	NA	NA	NA_x000D_
RAT24691	5.25105	P	6.47264	P	0.428808	2.33205	down	0	RAT24691	0	mRNA	Krt13	keratin 13	NA	NA	NM_001004021	NA	NA	NA	NA_x000D_
RAT07435	6.27568	P	7.52273	P	0.42131	2.37355	down	0	RAT07435	0	mRNA	Adam3a	ADAM metallopeptidase domain 3A	NA	NA	NM_020302	NA	NA	NA	NA_x000D_
RAT10403	7.00363	P	6.00036	P	2.00454	2.00454	up	0	RAT10403	0	mRNA	RGD1308430	similar to 1700123O20Rik protein	NA	NA	NM_001108376	NA	NA	NA	NA_x000D_
RAT21742	7.53175	P	5.48844	P	4.12192	4.12192	up	0	RAT21742	0	mRNA	RGD1310727	LOC363070	NA	NA	NM_001108764	NA	NA	NA	NA_x000D_
RAT06218	8.36297	P	7.17205	P	2.28299	2.28299	up	0	RAT06218	0	mRNA	Stap1	signal transducing adaptor family member 1	NA	NA	NM_001025115	NA	NA	NA	NA_x000D_
RAT18638	9.59613	P	7.69287	P	3.74056	3.74056	up	0	RAT18638	0	mRNA	Gpc2	glypican 2	NA	NA	NM_138511	NA	NA	NA	NA_x000D_
RAT04373	9.26948	P	7.73161	P	2.90364	2.90364	up	0	RAT04373	0	mRNA	Pldn	pallidin homolog (mouse)	NA	NA	NM_001025714	NA	NA	NA	NA_x000D_
RAT05523	5.27764	P	7.74784	P	0.180467	5.54119	down	0	RAT05523	0	mRNA	Bai2	brain-specific angiogenesis inhibitor 2	NA	NA	NM_001107914	NA	NA	NA	NA_x000D_
RAT26439	12.6344	P	14.3132	P	0.312342	3.20162	down	0	RAT26439	0	mRNA	Agpat6	"1-acylglycerol-3-phosphate O-acyltransferase 6 (lysophosphatidic acid acyltransferase, zeta)"	NA	NA	NM_001047849	NA	NA	NA	NA_x000D_
RAT22128	9.08833	P	10.5509	P	0.362847	2.75598	down	0	RAT22128	0	mRNA	Fmo2	flavin containing monooxygenase 2	NA	NA	NM_144737	NA	NA	NA	NA_x000D_
RAT07757	6.08323	P	8.37264	P	0.204559	4.88855	down	0	RAT07757	0	mRNA	Lrp1	low density lipoprotein receptor-related protein 1	NA	NA	NM_001130490	NA	NA	NA	NA_x000D_
RAT08795	7.67388	P	6.58996	P	2.1198	2.1198	up	0	RAT08795	0	mRNA	RGD1308127	similar to 2700078E11Rik protein	NA	NA	NM_001014248	NA	NA	NA	NA_x000D_
RAT16340	6.87155	P	8.36209	P	0.355879	2.80994	down	0	RAT16340	0	mRNA	LOC685617	similar to spermatogenesis associated glutamate (E)-rich protein 4b	NA	NA	ENSRNOT00000042781	NA	NA	NA	NA_x000D_
RAT17965	10.1164	P	11.2964	P	0.441354	2.26576	down	0	RAT17965	0	mRNA	RGD1564319	similar to TF-1 apoptosis related protein 19	NA	NA	NM_001126290	NA	NA	NA	NA_x000D_
RAT23335	11.9168	P	13.0278	P	0.462979	2.15992	down	0	RAT23335	0	mRNA	LOC690347	hypothetical protein LOC690347	NA	NA	XM_001074177	NA	NA	NA	NA_x000D_
RAT29850	11.1242	P	12.2471	P	0.459192	2.17774	down	0	RAT29850	0	mRNA	NA	NA	NA	NA	ENSRNOT00000051988	NA	NA	NA	NA_x000D_
RAT11434	5.07064	A	6.43546	P	0.388283	2.57544	down	0	RAT11434	0	mRNA	NA	NA	NA	NA	NA	NA	NA	NA	NA_x000D_
RAT30322	7.92105	P	5.56502	P	5.11958	5.11958	up	0	RAT30322	0	mRNA	Fcgbp	Fc fragment of IgG binding protein	NA	NA	NM_001164657	NA	NA	NA	NA_x000D_
RAT06552	7.56	P	6.38366	P	2.26003	2.26003	up	0	RAT06552	0	mRNA	Slc39a7	"solute carrier family 39 (zinc transporter), member 7"	NA	NA	NM_001008885	NA	NA	NA	NA_x000D_
RAT27325	6.10026	P	9.12701	P	0.122704	8.14969	down	0	RAT27325	0	mRNA	Wt1	Wilms tumor 1	NA	NA	NM_031534	NA	NA	NA	NA_x000D_
RAT27366	5.81556	P	4.33753	A	2.78568	2.78568	up	0	RAT27366	0	mRNA	NA	NA	NA	NA	NA	NA	NA	NA	NA_x000D_
RAT13187	7.61608	P	9.55206	P	0.261343	3.82639	down	0	RAT13187	0	mRNA	Prelp	proline/arginine-rich end leucine-rich repeat protein	NA	NA	NM_053385	NA	NA	NA	NA_x000D_
RAT12077	9.54033	P	12.4567	P	0.132459	7.54953	down	0	RAT12077	0	mRNA	Fxyd3	FXYD domain-containing ion transport regulator 3	NA	NA	NM_172317	NA	NA	NA	NA_x000D_
RAT18429	10.8183	P	9.74842	P	2.09924	2.09924	up	0	RAT18429	0	mRNA	NA	NA	NA	NA	NA	NA	NA	NA	NA_x000D_
RAT10226	5.86186	P	7.07281	P	0.431986	2.31489	down	0	RAT10226	0	mRNA	Piwil1	piwi-like 1 (Drosophila)	NA	NA	NM_001108853	NA	NA	NA	NA_x000D_
RAT09801	8.87816	P	7.53684	P	2.53383	2.53383	up	0	RAT09801	0	mRNA	RGD1560208	similar to Farnesyl pyrophosphate synthetase (FPP synthetase)	NA	NA	XM_227370	NA	NA	NA	NA_x000D_
RAT24858	18.2949	P	17.1952	P	2.14317	2.14317	up	0	RAT24858	0	mRNA	Wfdc10	WAP four-disulfide core domain 10	NA	NA	NM_001109461	NA	NA	NA	NA_x000D_
RAT07273	8.41305	P	9.56605	P	0.449687	2.22377	down	0	RAT07273	0	mRNA	Myo5b	myosin Vb	NA	NA	NM_017083	NA	NA	NA	NA_x000D_
RAT10920	6.44306	P	5.27279	P	2.25055	2.25055	up	0	RAT10920	0	mRNA	Mum1l1	melanoma associated antigen (mutated) 1-like 1	NA	NA	NM_001109321	NA	NA	NA	NA_x000D_
RAT08507	8.3982	P	7.03881	P	2.56578	2.56578	up	0	RAT08507	0	mRNA	Tmem128	transmembrane protein 128	NA	NA	NM_001108362	NA	NA	NA	NA_x000D_
RAT23698	2.59715	A	5.35265	P	0.148085	6.75287	down	0	RAT23698	0	mRNA	Vom1r95	vomeronasal 1 receptor 95	NA	NA	NM_001008950	NA	NA	NA	NA_x000D_
RAT21101	7.7531	P	10.3616	P	0.163973	6.09858	down	0	RAT21101	0	mRNA	Upk3b	uroplakin 3B	NA	NA	ENSRNOT00000037639	NA	NA	NA	NA_x000D_
RAT02501	7.59625	P	9.53966	P	0.26	3.84615	down	0	RAT02501	0	mRNA	Emp2	epithelial membrane protein 2	NA	NA	NM_001007721	NA	NA	NA	NA_x000D_
RAT24443	6.52149	P	7.80142	P	0.411814	2.42828	down	0	RAT24443	0	mRNA	LOC681198	similar to Spetex-2F protein	NA	NA	ENSRNOT00000061522	NA	NA	NA	NA_x000D_
RAT00096	7.03003	P	5.37389	A	3.15172	3.15172	up	0	RAT00096	0	mRNA	Kif16b	kinesin family member 16B	NA	NA	NM_001107783	NA	NA	NA	NA_x000D_
RAT15965	6.71052	P	7.71159	P	0.499628	2.00149	down	0	RAT15965	0	mRNA	Klf6	Kruppel-like factor 6	NA	NA	NM_031642	NA	NA	NA	NA_x000D_
RAT10413	6.34306	P	7.64187	P	0.406461	2.46026	down	0	RAT10413	0	mRNA	Fscb	fibrous sheath CABYR binding protein	NA	NA	ENSRNOT00000046828	NA	NA	NA	NA_x000D_
RAT03661	7.22754	P	8.56789	P	0.394924	2.53213	down	0	RAT03661	0	mRNA	Cdc42ep2	CDC42 effector protein (Rho GTPase binding) 2	NA	NA	NM_001009689	NA	NA	NA	NA_x000D_
RAT11491	9.49968	P	10.6744	P	0.442975	2.25746	down	0	RAT11491	0	mRNA	N4bp2l2	NEDD4 binding protein 2-like 2	NA	NA	NM_001005533	NA	NA	NA	NA_x000D_
RAT07825	8.97256	P	7.90319	P	2.09851	2.09851	up	0	RAT07825	0	mRNA	Glul	glutamate-ammonia ligase	NA	NA	NM_017073	NA	NA	NA	NA_x000D_
RAT28370	11.8235	P	10.3588	P	2.76003	2.76003	up	0	RAT28370	0	mRNA	NA	NA	NA	NA	TC618133	NA	NA	NA	NA_x000D_
RAT05401	8.80786	P	7.70847	P	2.14264	2.14264	up	0	RAT05401	0	mRNA	Celsr3	"cadherin, EGF LAG seven-pass G-type receptor 3 (flamingo homolog, Drosophila)"	NA	NA	NM_031320	NA	NA	NA	NA_x000D_
RAT22588	7.7912	P	9.7158	P	0.263414	3.79631	down	0	RAT22588	0	mRNA	Hormad2	HORMA domain containing 2	NA	NA	NM_001017501	NA	NA	NA	NA_x000D_
RAT27825	7.86325	P	6.66911	P	2.28809	2.28809	up	0	RAT27825	0	mRNA	Maoa	monoamine oxidase A	NA	NA	NM_033653	NA	NA	NA	NA_x000D_
RAT22151	10.6525	P	9.20603	P	2.72532	2.72532	up	0	RAT22151	0	mRNA	Atxn10	ataxin 10	NA	NA	NM_133313	NA	NA	NA	NA_x000D_
RAT06844	8.48794	P	7.39415	P	2.13434	2.13434	up	0	RAT06844	0	mRNA	Polr3k	polymerase (RNA) III (DNA directed) polypeptide K	NA	NA	NM_001014259	NA	NA	NA	NA_x000D_
RAT10768	10.3609	P	9.23822	P	2.17749	2.17749	up	0	RAT10768	0	mRNA	NA	NA	NA	NA	TC581820	NA	NA	NA	NA_x000D_
RAT11155	6.15533	P	7.23494	P	0.473155	2.11347	down	0	RAT11155	0	mRNA	Dnali1	"dynein, axonemal, light intermediate chain 1"	NA	NA	NM_001031647	NA	NA	NA	NA_x000D_
RAT21527	9.33665	P	7.66143	P	3.19367	3.19367	up	0	RAT21527	0	mRNA	Lsm6	"LSM6 homolog, U6 small nuclear RNA associated (S. cerevisiae)"	NA	NA	NM_001126085	NA	NA	NA	NA_x000D_
RAT25151	6.554	P	5.12713	A	2.68863	2.68863	up	0	RAT25151	0	mRNA	NA	NA	NA	NA	NA	NA	NA	NA	NA_x000D_
RAT16485	11.1289	P	12.2608	P	0.456319	2.19145	down	0	RAT16485	0	mRNA	NA	NA	NA	NA	NA	NA	NA	NA	NA_x000D_
RAT02043	10.2342	P	11.5405	P	0.404346	2.47313	down	0	RAT02043	0	mRNA	S100a4	S100 calcium-binding protein A4	NA	NA	NM_012618	NA	NA	NA	NA_x000D_
RAT06783	5.34031	P	4.26711	A	2.10409	2.10409	up	0	RAT06783	0	mRNA	P2ry14	"purinergic receptor P2Y, G-protein coupled, 14"	NA	NA	NM_133577	NA	NA	NA	NA_x000D_
RAT07011	6.06647	P	2.6369	A	10.7747	10.7747	up	0	RAT07011	0	mRNA	LOC684996	similar to chromosome 7 open reading frame 11	NA	NA	NM_001109452	NA	NA	NA	NA_x000D_
RAT18790	8.9501	P	7.6378	P	2.48338	2.48338	up	0	RAT18790	0	mRNA	NA	NA	NA	NA	TC618088	NA	NA	NA	NA_x000D_
RAT04254	8.34937	P	6.87184	P	2.78472	2.78472	up	0	RAT04254	0	mRNA	Asah1	N-acylsphingosine amidohydrolase (acid ceramidase) 1	NA	NA	NM_053407	NA	NA	NA	NA_x000D_
RAT05194	8.44828	P	10.8435	P	0.19009	5.26067	down	0	RAT05194	0	mRNA	Selenbp1	selenium binding protein 1	NA	NA	NM_080892	NA	NA	NA	NA_x000D_
RAT22430	9.11808	P	10.5197	P	0.378498	2.64202	down	0	RAT22430	0	mRNA	Ppp2r2b	"protein phosphatase 2, regulatory subunit B, beta"	NA	NA	NM_022209	NA	NA	NA	NA_x000D_
RAT03972	6.92108	P	5.90073	P	2.02841	2.02841	up	0	RAT03972	0	mRNA	Nudt19	nudix (nucleoside diphosphate linked moiety X)-type motif 19	NA	NA	NM_001004258	NA	NA	NA	NA_x000D_
RAT01950	9.90864	P	8.32785	P	2.99133	2.99133	up	0	RAT01950	0	mRNA	Cmbl	carboxymethylenebutenolidase homolog (Pseudomonas)	NA	NA	NM_001008770	NA	NA	NA	NA_x000D_
RAT27052	7.39022	P	6.0289	P	2.5692	2.5692	up	0	RAT27052	0	mRNA	Psmd3	"proteasome (prosome, macropain) 26S subunit, non-ATPase, 3"	NA	NA	NM_001008281	NA	NA	NA	NA_x000D_
RAT24650	9.99451	P	8.47124	P	2.87441	2.87441	up	0	RAT24650	0	mRNA	Ces1e	carboxylesterase 1E	NA	NA	NM_031565	NA	NA	NA	NA_x000D_
RAT01905	13.52	P	11.7975	P	3.30021	3.30021	up	0	RAT01905	0	mRNA	Tspan1	tetraspanin 1	NA	NA	NM_001004236	NA	NA	NA	NA_x000D_
RAT14402	8.3146	P	9.72145	P	0.377136	2.65156	down	0	RAT14402	0	mRNA	Serpinb1a	"serine (or cysteine) proteinase inhibitor, clade B, member 1a"	NA	NA	NM_001031642	NA	NA	NA	NA_x000D_
RAT21284	6.10198	P	4.6886	A	2.66361	2.66361	up	0	RAT21284	0	mRNA	Actr6	ARP6 actin-related protein 6 homolog (yeast)	NA	NA	NM_001108081	NA	NA	NA	NA_x000D_
RAT07456	12.4781	P	11.1371	P	2.53318	2.53318	up	0	RAT07456	0	mRNA	Sectm1a	secreted and transmembrane 1A	NA	NA	NM_001013043	NA	NA	NA	NA_x000D_
RAT20693	7.7265	P	6.26767	P	2.74884	2.74884	up	0	RAT20693	0	mRNA	Map3k1	mitogen activated protein kinase kinase kinase 1	NA	NA	NM_053887	NA	NA	NA	NA_x000D_
RAT06950	8.21128	P	6.32958	P	3.68509	3.68509	up	0	RAT06950	0	mRNA	Hmgcr	3-hydroxy-3-methylglutaryl-CoA reductase	NA	NA	NM_013134	NA	NA	NA	NA_x000D_
RAT20622	6.92022	P	8.37148	P	0.365703	2.73446	down	0	RAT20622	0	mRNA	NA	NA	NA	NA	ENSRNOT00000061377	NA	NA	NA	NA_x000D_
RAT12497	11.6738	P	10.1617	P	2.85219	2.85219	up	0	RAT12497	0	mRNA	NA	NA	NA	NA	NA	NA	NA	NA	NA_x000D_
RAT00365	6.28476	P	7.53974	P	0.419	2.38663	down	0	RAT00365	0	mRNA	Gng8	"guanine nucleotide binding protein (G protein), gamma 8"	NA	NA	NM_139185	NA	NA	NA	NA_x000D_
RAT05493	5.8702	P	4.12019	A	3.36361	3.36361	up	0	RAT05493	0	mRNA	Mlc1	megalencephalic leukoencephalopathy with subcortical cysts 1 homolog (human)	NA	NA	NM_001108105	NA	NA	NA	NA_x000D_
RAT26207	9.96399	P	11.189	P	0.427806	2.33751	down	0	RAT26207	0	mRNA	C2cd4b	C2 calcium-dependent domain containing 4B	NA	NA	ENSRNOT00000012048	NA	NA	NA	NA_x000D_
RAT11566	7.28983	P	5.64243	P	3.13267	3.13267	up	0	RAT11566	0	mRNA	Mmp2	matrix metallopeptidase 2	NA	NA	NM_031054	NA	NA	NA	NA_x000D_
RAT20220	4.5867	A	5.83491	P	0.420971	2.37546	down	0	RAT20220	0	mRNA	Olfr304	membrane-associated ring finger (C3HC4) 11	NA	NA	NM_001101828	NA	NA	NA	NA_x000D_
RAT26777	11.808	P	12.977	P	0.444733	2.24854	down	0	RAT26777	0	mRNA	NA	NA	NA	NA	NA	NA	NA	NA	NA_x000D_
RAT28574	8.95875	P	7.94037	P	2.02565	2.02565	up	0	RAT28574	0	mRNA	LOC500354	similar to C030030A07Rik protein	NA	NA	NM_001037797	NA	NA	NA	NA_x000D_
RAT04472	11.8335	P	10.4712	P	2.57089	2.57089	up	0	RAT04472	0	mRNA	Crabp2	cellular retinoic acid binding protein 2	NA	NA	NM_017244	NA	NA	NA	NA_x000D_
RAT18802	7.1099	P	8.85218	P	0.298897	3.34564	down	0	RAT18802	0	mRNA	Gpc3	glypican 3	NA	NA	NM_012774	NA	NA	NA	NA_x000D_
RAT11306	5.04257	A	6.42505	P	0.383559	2.60716	down	0	RAT11306	0	mRNA	NA	NA	NA	NA	TC615359	NA	NA	NA	NA_x000D_
RAT01996	6.15135	P	7.67257	P	0.348392	2.87033	down	0	RAT01996	0	mRNA	Sdc2	syndecan 2	NA	NA	ENSRNOT00000007255	NA	NA	NA	NA_x000D_
RAT21105	4.50721	A	6.16097	P	0.317812	3.14652	down	0	RAT21105	0	mRNA	Mpdz	multiple PDZ domain protein	NA	NA	NM_019196	NA	NA	NA	NA_x000D_
RAT06714	6.46481	P	7.98559	P	0.348499	2.86945	down	0	RAT06714	0	mRNA	Flna	"filamin A, alpha"	NA	NA	NM_001134599	NA	NA	NA	NA_x000D_
RAT28797	10.7854	P	11.808	P	0.492248	2.0315	down	0	RAT28797	0	mRNA	NA	NA	NA	NA	NA	NA	NA	NA	NA_x000D_
RAT10676	6.26853	P	5.12572	A	2.20811	2.20811	up	0	RAT10676	0	mRNA	Cox11	COX11 cytochrome c oxidase assembly homolog (yeast)	NA	NA	NM_001109575	NA	NA	NA	NA_x000D_
RAT24702	4.53245	A	5.79066	P	0.418063	2.39198	down	0	RAT24702	0	mRNA	NA	NA	NA	NA	TC611735	NA	NA	NA	NA_x000D_
RAT12065	4.46423	A	5.51961	P	0.481171	2.07826	down	0	RAT12065	0	mRNA	NA	NA	NA	NA	ENSRNOT00000061003	NA	NA	NA	NA_x000D_
RAT11808	13.2217	P	14.236	P	0.495061	2.01995	down	0	RAT11808	0	mRNA	NA	NA	NA	NA	NA	NA	NA	NA	NA_x000D_
RAT09445	5.97518	P	2.78483	A	9.12831	9.12831	up	0	RAT09445	0	mRNA	Cables2	Cdk5 and Abl enzyme substrate 2	NA	NA	ENSRNOT00000008279	NA	NA	NA	NA_x000D_
RAT06292	5.37439	P	4.21444	A	2.2345	2.2345	up	0	RAT06292	0	mRNA	Sp6	Sp6 transcription factor	NA	NA	NM_001108833	NA	NA	NA	NA_x000D_
RAT12802	10.3272	P	9.30799	P	2.02675	2.02675	up	0	RAT12802	0	mRNA	Slc39a4l	"solute carrier family 39 (zinc transporter), member 4-like"	NA	NA	NM_001101021	NA	NA	NA	NA_x000D_
RAT08948	8.95449	P	11.2859	P	0.198691	5.03295	down	0	RAT08948	0	mRNA	NA	NA	NA	NA	ENSRNOT00000037316	NA	NA	NA	NA_x000D_
RAT03759	7.90217	P	9.35845	P	0.36443	2.74401	down	0	RAT03759	0	mRNA	Ly6e	"lymphocyte antigen 6 complex, locus E"	NA	NA	NM_001017467	NA	NA	NA	NA_x000D_
RAT21257	16.4039	P	14.3567	P	4.13296	4.13296	up	0	RAT21257	0	mRNA	LOC690319	similar to Alpha-1-antitrypsin-related protein precursor	NA	NA	XM_001074075	NA	NA	NA	NA_x000D_
RAT00125	7.91021	P	6.88835	P	2.03053	2.03053	up	0	RAT00125	0	mRNA	Ttc7b	tetratricopeptide repeat domain 7B	NA	NA	NM_001108719	NA	NA	NA	NA_x000D_
RAT10625	7.56635	P	8.94309	P	0.385088	2.59681	down	0	RAT10625	0	mRNA	Cct6b	"chaperonin containing Tcp1, subunit 6B (zeta 2)"	NA	NA	NM_001014228	NA	NA	NA	NA_x000D_
RAT20991	9.77162	P	8.70313	P	2.09723	2.09723	up	0	RAT20991	0	mRNA	Snn	stannin	NA	NA	NM_001034083	NA	NA	NA	NA_x000D_
RAT08094	2.53065	A	5.62786	P	0.116855	8.55761	down	0	RAT08094	0	mRNA	RGD1561654	similar to hypothetical protein	NA	NA	XM_227826	NA	NA	NA	NA_x000D_
RAT24280	8.18766	P	10.0498	P	0.275058	3.6356	down	0	RAT24280	0	mRNA	MGC116197	similar to RIKEN cDNA 1700001E04	NA	NA	NM_001025755	NA	NA	NA	NA_x000D_
RAT22712	5.4483	P	6.79043	P	0.394436	2.53527	down	0	RAT22712	0	mRNA	NA	NA	NA	NA	ENSRNOT00000049270	NA	NA	NA	NA_x000D_
RAT01088	7.69089	P	6.21133	P	2.78863	2.78863	up	0	RAT01088	0	mRNA	Vipr1	vasoactive intestinal peptide receptor 1	NA	NA	NM_012685	NA	NA	NA	NA_x000D_
RAT24033	12.5904	P	13.7577	P	0.445249	2.24593	down	0	RAT24033	0	mRNA	MGC93861	hypothetical protein LOC682010	NA	NA	NM_001044281	NA	NA	NA	NA_x000D_
RAT14661	6.48846	P	9.10145	P	0.16346	6.11772	down	0	RAT14661	0	mRNA	Flvcr2	"feline leukemia virus subgroup C cellular receptor family, member 2"	NA	NA	NM_199109	NA	NA	NA	NA_x000D_
RAT14534	11.9631	P	10.8834	P	2.11358	2.11358	up	0	RAT14534	0	mRNA	NA	NA	NA	NA	DV716357	NA	NA	NA	NA_x000D_
RAT12581	7.92624	P	6.47248	P	2.7392	2.7392	up	0	RAT12581	0	mRNA	Slc25a13	"solute carrier family 25, member 13 (citrin)"	NA	NA	ENSRNOT00000013817	NA	NA	NA	NA_x000D_
RAT10412	5.96664	P	7.02309	P	0.480814	2.07981	down	0	RAT10412	0	mRNA	RGD1563015	RGD1563015	NA	NA	NM_001134627	NA	NA	NA	NA_x000D_
RAT19304	5.65816	P	7.0763	P	0.374195	2.6724	down	0	RAT19304	0	mRNA	LOC686147	hypothetical protein LOC686147	NA	NA	XM_001066698	NA	NA	NA	NA_x000D_
RAT12221	6.32058	P	7.4634	P	0.452875	2.20811	down	0	RAT12221	0	mRNA	RGD1309808	similar to apolipoprotein L2; apolipoprotein L-II	NA	NA	NM_001134801	NA	NA	NA	NA_x000D_
RAT12229	8.65518	P	7.54192	P	2.16333	2.16333	up	0	RAT12229	0	mRNA	Cesl1	carboxylesterase-like 1	NA	NA	NM_001024365	NA	NA	NA	NA_x000D_
RAT27250	6.35088	P	5.2385	A	2.16202	2.16202	up	0	RAT27250	0	mRNA	NA	NA	NA	NA	NA	NA	NA	NA	NA_x000D_
RAT19347	5.06915	A	6.56766	P	0.353917	2.82552	down	0	RAT19347	0	mRNA	LOC686018	hypothetical protein LOC686018	NA	NA	XM_001066193	NA	NA	NA	NA_x000D_
RAT16657	12.8339	P	13.8573	P	0.491966	2.03266	down	0	RAT16657	0	mRNA	LOC684822	"similar to transcription elongation factor B (SIII), polypeptide 2"	NA	NA	ENSRNOT00000040365	NA	NA	NA	NA_x000D_
RAT26468	5.11647	A	6.40537	P	0.409263	2.44342	down	0	RAT26468	0	mRNA	RGD1562964	similar to glyceraldehyde-phosphate-dehydrogenase	NA	NA	XM_002725895	NA	NA	NA	NA_x000D_
RAT13415	6.21372	P	5.12688	A	2.12409	2.12409	up	0	RAT13415	0	mRNA	Utp6	"UTP6, small subunit (SSU) processome component, homolog (yeast)"	NA	NA	XM_002724525	NA	NA	NA	NA_x000D_
RAT20879	5.86795	P	4.85026	A	2.02468	2.02468	up	0	RAT20879	0	mRNA	Myh8	"myosin, heavy chain 8, skeletal muscle, perinatal"	NA	NA	NM_001100485	NA	NA	NA	NA_x000D_
RAT29245	8.46139	P	9.71007	P	0.420834	2.37623	down	0	RAT29245	0	mRNA	Nfatc4	"nuclear factor of activated T-cells, cytoplasmic, calcineurin-dependent 4"	NA	NA	NM_001107264	NA	NA	NA	NA_x000D_
RAT21318	6.21694	P	4.78629	A	2.6957	2.6957	up	0	RAT21318	0	mRNA	Ttc9	tetratricopeptide repeat domain 9	NA	NA	NM_001134731	NA	NA	NA	NA_x000D_
RAT17902	5.20765	P	7.06828	P	0.275356	3.63166	down	0	RAT17902	0	mRNA	Ildr2	immunoglobulin-like domain containing receptor 2	NA	NA	ENSRNOT00000031367	NA	NA	NA	NA_x000D_
RAT05470	6.76982	P	7.82121	P	0.482501	2.07253	down	0	RAT05470	0	mRNA	Tnfrsf25	"tumor necrosis factor receptor superfamily, member 25"	NA	NA	NM_001137644	NA	NA	NA	NA_x000D_
RAT17684	7.36064	P	8.91576	P	0.340302	2.93857	down	0	RAT17684	0	mRNA	NA	NA	NA	NA	NA	NA	NA	NA	NA_x000D_
RAT09266	4.24646	A	5.73583	P	0.356169	2.80766	down	0	RAT09266	0	mRNA	NA	NA	NA	NA	BF566349	NA	NA	NA	NA_x000D_
RAT03171	4.35457	A	5.38569	P	0.489331	2.04361	down	0	RAT03171	0	mRNA	Rfx3	"regulatory factor X, 3 (influences HLA class II expression)"	NA	NA	NM_001012172	NA	NA	NA	NA_x000D_
RAT01681	13.5009	P	15.6314	P	0.228381	4.37866	down	0	RAT01681	0	mRNA	LOC360228	WDNM1 homolog	NA	NA	NM_001003706	NA	NA	NA	NA_x000D_
RAT11466	10.0419	P	11.6516	P	0.327664	3.0519	down	0	RAT11466	0	mRNA	LOC680885	hypothetical protein LOC680885	NA	NA	NM_001109431	NA	NA	NA	NA_x000D_
RAT02177	15.3968	P	16.4876	P	0.469481	2.13001	down	0	RAT02177	0	mRNA	Dbil5	diazepam binding inhibitor-like 5	NA	NA	NM_021596	NA	NA	NA	NA_x000D_
RAT25158	8.51075	P	9.52458	P	0.495231	2.01926	down	0	RAT25158	0	mRNA	NA	NA	NA	NA	ENSRNOT00000027841	NA	NA	NA	NA_x000D_
RAT16628	9.53518	P	11.5519	P	0.247119	4.04664	down	0	RAT16628	0	mRNA	Pim1	pim-1 oncogene	NA	NA	NM_017034	NA	NA	NA	NA_x000D_
RAT25103	5.00498	A	6.75679	P	0.296928	3.36782	down	0	RAT25103	0	mRNA	Nebl	nebulette	NA	NA	ENSRNOT00000037601	NA	NA	NA	NA_x000D_
RAT03335	8.06838	P	6.71261	P	2.55934	2.55934	up	0	RAT03335	0	mRNA	Nsdhl	NAD(P) dependent steroid dehydrogenase-like	NA	NA	NM_001009399	NA	NA	NA	NA_x000D_
RAT15930	8.07344	P	6.89364	P	2.26545	2.26545	up	0	RAT15930	0	mRNA	Paqr3	progestin and adipoQ receptor family member III	NA	NA	NM_001012033	NA	NA	NA	NA_x000D_
RAT11720	5.14351	A	6.51434	P	0.386668	2.5862	down	0	RAT11720	0	mRNA	Sh3pxd2a	SH3 and PX domains 2A	NA	NA	NM_001107606	NA	NA	NA	NA_x000D_
RAT24569	5.44204	P	6.95547	P	0.350278	2.85487	down	0	RAT24569	0	mRNA	Rab27b	"RAB27B, member RAS oncogene family"	NA	NA	NM_053459	NA	NA	NA	NA_x000D_
RAT29209	7.69959	P	8.9841	P	0.410512	2.43598	down	0	RAT29209	0	mRNA	Adam5	a disintegrin and metallopeptidase domain 5	NA	NA	NM_020303	NA	NA	NA	NA_x000D_
RAT09147	7.91913	P	6.80689	P	2.16181	2.16181	up	0	RAT09147	0	mRNA	Pla2g4a	"phospholipase A2, group IVA (cytosolic, calcium-dependent)"	NA	NA	NM_133551	NA	NA	NA	NA_x000D_
RAT21212	6.07165	P	2.77138	A	9.85099	9.85099	up	0	RAT21212	0	mRNA	RGD1562011	"similar to MAS-related G-protein coupled receptor, member G"	NA	NA	XM_001066085	NA	NA	NA	NA_x000D_
RAT20260	5.39911	P	3.66554	A	3.3255	3.3255	up	0	RAT20260	0	mRNA	Csrnp2	cysteine-serine-rich nuclear protein 2	NA	NA	NM_001108113	NA	NA	NA	NA_x000D_
RAT06968	5.47519	P	4.3374	A	2.20044	2.20044	up	0	RAT06968	0	mRNA	RGD1304827	hypothetical LOC316091	NA	NA	NM_001009437	NA	NA	NA	NA_x000D_
RAT21771	6.0866	P	4.39363	A	3.2332	3.2332	up	0	RAT21771	0	mRNA	Slc46a2	"solute carrier family 46, member 2"	NA	NA	NM_001106652	NA	NA	NA	NA_x000D_
RAT03587	3.87724	A	5.31081	P	0.370214	2.70114	down	0	RAT03587	0	mRNA	Hmga2	high mobility group AT-hook 2	NA	NA	NM_032070	NA	NA	NA	NA_x000D_
RAT06290	6.5486	P	7.60716	P	0.480112	2.08285	down	0	RAT06290	0	mRNA	Ybx2	Y box binding protein 2	NA	NA	ENSRNOT00000023003	NA	NA	NA	NA_x000D_
RAT06568	6.41859	P	7.4896	P	0.475987	2.1009	down	0	RAT06568	0	mRNA	Bcl6	B-cell CLL/lymphoma 6	NA	NA	NM_001107084	NA	NA	NA	NA_x000D_
RAT21137	8.54986	P	9.93394	P	0.383135	2.61005	down	0	RAT21137	0	mRNA	Olfml3	olfactomedin-like 3	NA	NA	NM_001107708	NA	NA	NA	NA_x000D_
RAT16171	10.6263	P	9.45484	P	2.25245	2.25245	up	0	RAT16171	0	mRNA	Comt	catechol-O-methyltransferase	NA	NA	NM_012531	NA	NA	NA	NA_x000D_
RAT20354	7.82121	P	6.42552	P	2.63115	2.63115	up	0	RAT20354	0	mRNA	NA	NA	NA	NA	NA	NA	NA	NA	NA_x000D_
RAT09685	10.9032	P	9.76554	P	2.2003	2.2003	up	0	RAT09685	0	mRNA	LOC683077	"similar to praja1, RING-H2 motif containing"	NA	NA	NM_001101006	NA	NA	NA	NA_x000D_
RAT26036	4.18017	A	6.14006	P	0.257047	3.89034	down	0	RAT26036	0	mRNA	Bicc1	bicaudal C homolog 1 (Drosophila)	NA	NA	NM_001108531	NA	NA	NA	NA_x000D_
RAT30061	8.57336	P	10.5414	P	0.255606	3.91227	down	0	RAT30061	0	mRNA	Rims2	regulating synaptic membrane exocytosis 2	NA	NA	NM_053945	NA	NA	NA	NA_x000D_
RAT21504	7.67696	P	6.43436	P	2.36624	2.36624	up	0	RAT21504	0	mRNA	NA	NA	NA	NA	NA	NA	NA	NA	NA_x000D_
RAT08865	6.08522	P	7.81335	P	0.301842	3.31299	down	0	RAT08865	0	mRNA	Tnfrsf11b	"tumor necrosis factor receptor superfamily, member 11b"	NA	NA	NM_012870	NA	NA	NA	NA_x000D_
RAT07381	8.70386	P	7.51747	P	2.27582	2.27582	up	0	RAT07381	0	mRNA	Ssr1	"signal sequence receptor, alpha"	NA	NA	NM_001008891	NA	NA	NA	NA_x000D_
RAT28092	10.6222	P	11.8998	P	0.412488	2.42431	down	0	RAT28092	0	mRNA	NA	NA	NA	NA	NA	NA	NA	NA	NA_x000D_
RAT16082	5.41596	P	4.07503	A	2.53313	2.53313	up	0	RAT16082	0	mRNA	NA	NA	NA	NA	NA	NA	NA	NA	NA_x000D_
RAT21309	6.18715	P	7.27095	P	0.471785	2.11961	down	0	RAT21309	0	mRNA	Kitlg	KIT ligand	NA	NA	NM_021843	NA	NA	NA	NA_x000D_
RAT27159	8.67571	P	7.52859	P	2.21471	2.21471	up	0	RAT27159	0	mRNA	Alg9	"asparagine-linked glycosylation 9, alpha-1,2-mannosyltransferase homolog (S. cerevisiae)"	NA	NA	NM_001109000	NA	NA	NA	NA_x000D_
RAT28698	5.4381	P	2.4911	A	7.71143	7.71143	up	0	RAT28698	0	mRNA	Grin3a	"glutamate receptor, ionotropic, N-methyl-D-aspartate 3A"	NA	NA	NM_138546	NA	NA	NA	NA_x000D_
RAT10006	8.37084	P	9.42075	P	0.482998	2.0704	down	0	RAT10006	0	mRNA	Clpb	ClpB caseinolytic peptidase B homolog (E. coli)	NA	NA	NM_022947	NA	NA	NA	NA_x000D_
RAT12677	4.80746	A	5.82553	P	0.493779	2.0252	down	0	RAT12677	0	mRNA	NA	NA	NA	NA	NA	NA	NA	NA	NA_x000D_
RAT07377	5.11054	A	6.11311	P	0.499108	2.00357	down	0	RAT07377	0	mRNA	Cps1	carbamoyl-phosphate synthetase 1	NA	NA	NM_017072	NA	NA	NA	NA_x000D_
RAT03691	10.7128	P	9.22033	P	2.81374	2.81374	up	0	RAT03691	0	mRNA	Depdc7	DEP domain containing 7	NA	NA	NM_001029916	NA	NA	NA	NA_x000D_
RAT25404	9.75659	P	11.6052	P	0.277656	3.60158	down	0	RAT25404	0	mRNA	NA	NA	NA	NA	ENSRNOT00000063806	NA	NA	NA	NA_x000D_
RAT24901	4.53055	A	5.65238	P	0.45951	2.17623	down	0	RAT24901	0	mRNA	NA	NA	NA	NA	NA	NA	NA	NA	NA_x000D_
RAT07528	7.19861	P	8.24149	P	0.48536	2.06033	down	0	RAT07528	0	mRNA	Fmo3	flavin containing monooxygenase 3	NA	NA	NM_053433	NA	NA	NA	NA_x000D_
RAT03850	5.72373	P	4.29975	A	2.68325	2.68325	up	0	RAT03850	0	mRNA	Ncam2	neural cell adhesion molecule 2	NA	NA	NM_203409	NA	NA	NA	NA_x000D_
RAT27666	7.12104	P	8.52813	P	0.377073	2.65201	down	0	RAT27666	0	mRNA	Serp2	stress-associated endoplasmic reticulum protein family member 2	NA	NA	NM_001109104	NA	NA	NA	NA_x000D_
RAT02949	5.87272	P	4.75418	A	2.17127	2.17127	up	0	RAT02949	0	mRNA	Ikbip	IKBKB interacting protein	NA	NA	ENSRNOT00000010929	NA	NA	NA	NA_x000D_
RAT04691	2.6378	A	5.45913	P	0.14148	7.06815	down	0	RAT04691	0	mRNA	LOC100361645	LRRGT00075-like	NA	NA	NM_001177816	NA	NA	NA	NA_x000D_
RAT12004	6.24895	P	7.6976	P	0.366365	2.72952	down	0	RAT12004	0	mRNA	Lix1l	Lix1 homolog (mouse)-like	NA	NA	NM_001024303	NA	NA	NA	NA_x000D_
RAT26910	2.63333	A	5.67673	P	0.121296	8.24428	down	0	RAT26910	0	mRNA	Cd209e	CD209e molecule	NA	NA	NM_001192005	NA	NA	NA	NA_x000D_
RAT08748	6.9504	P	5.44599	P	2.83708	2.83708	up	0	RAT08748	0	mRNA	Kcnj13	"potassium inwardly-rectifying channel, subfamily J, member 13"	NA	NA	NM_053608	NA	NA	NA	NA_x000D_
RAT26464	3.88033	A	6.46382	P	0.166838	5.99385	down	0	RAT26464	0	mRNA	NA	NA	NA	NA	NA	NA	NA	NA	NA_x000D_
RAT29074	9.63336	P	11.1335	P	0.35352	2.82869	down	0	RAT29074	0	mRNA	Pfn3	profilin 3	NA	NA	NM_001109487	NA	NA	NA	NA_x000D_
RAT01205	7.1281	P	8.18905	P	0.479316	2.08631	down	0	RAT01205	0	mRNA	Csf1	colony stimulating factor 1 (macrophage)	NA	NA	NM_023981	NA	NA	NA	NA_x000D_
RAT22417	3.69014	A	6.80076	P	0.115774	8.63755	down	0	RAT22417	0	mRNA	Vom2r18	"vomeronasal 2 receptor, 18"	NA	NA	NM_173318	NA	NA	NA	NA_x000D_
RAT04536	5.15472	P	2.48997	A	6.3412	6.3412	up	0	RAT04536	0	mRNA	Art2	ADP-ribosyltransferase 2	NA	NA	NM_198735	NA	NA	NA	NA_x000D_
RAT14414	6.72572	P	5.61308	P	2.1624	2.1624	up	0	RAT14414	0	mRNA	Ly96	lymphocyte antigen 96	NA	NA	NM_001024279	NA	NA	NA	NA_x000D_
RAT01476	8.10467	P	9.45083	P	0.393338	2.54235	down	0	RAT01476	0	mRNA	Irak3	interleukin-1 receptor-associated kinase 3	NA	NA	NM_001108101	NA	NA	NA	NA_x000D_
RAT05914	8.21108	P	7.18456	P	2.03711	2.03711	up	0	RAT05914	0	mRNA	Cwc27	CWC27 spliceosome-associated protein homolog (S. cerevisiae)	NA	NA	NM_001013199	NA	NA	NA	NA_x000D_
RAT14697	6.07217	P	7.32681	P	0.419097	2.38608	down	0	RAT14697	0	mRNA	Tctn1	tectonic family member 1	NA	NA	NM_001177613	NA	NA	NA	NA_x000D_
RAT04998	4.80154	A	6.50731	P	0.306558	3.26202	down	0	RAT04998	0	mRNA	Letm2	leucine zipper-EF-hand containing transmembrane protein 2	NA	NA	NM_001012158	NA	NA	NA	NA_x000D_
RAT01079	5.57827	P	4.36182	A	2.32375	2.32375	up	0	RAT01079	0	mRNA	Uqcrb	ubiquinol-cytochrome c reductase binding protein	NA	NA	NM_001127553	NA	NA	NA	NA_x000D_
RAT17115	9.87187	P	11.2459	P	0.385823	2.59186	down	0	RAT17115	0	mRNA	NA	NA	NA	NA	ENSRNOT00000056597	NA	NA	NA	NA_x000D_
RAT23758	13.5562	P	14.6222	P	0.477638	2.09364	down	0	RAT23758	0	mRNA	Tceb2	"transcription elongation factor B (SIII), polypeptide 2"	NA	NA	NM_031129	NA	NA	NA	NA_x000D_
RAT20513	7.60668	P	6.43102	P	2.25896	2.25896	up	0	RAT20513	0	mRNA	NA	NA	NA	NA	ENSRNOT00000006006	NA	NA	NA	NA_x000D_
RAT21999	7.62003	P	6.59552	P	2.03428	2.03428	up	0	RAT21999	0	mRNA	Polr3g	polymerase (RNA) III (DNA directed) polypeptide G	NA	NA	NM_001109468	NA	NA	NA	NA_x000D_
RAT10817	5.54195	P	7.02803	P	0.356981	2.80127	down	0	RAT10817	0	mRNA	Vopp1	"vesicular, overexpressed in cancer, prosurvival protein 1"	NA	NA	NM_001108630	NA	NA	NA	NA_x000D_
RAT10369	7.73117	P	6.42842	P	2.467	2.467	up	0	RAT10369	0	mRNA	NA	NA	NA	NA	ENSRNOT00000060917	NA	NA	NA	NA_x000D_
RAT08631	7.73894	P	9.19703	P	0.363975	2.74744	down	0	RAT08631	0	mRNA	Tssk6	testis-specific serine kinase 6	NA	NA	NM_001106078	NA	NA	NA	NA_x000D_
RAT20778	5.4021	P	6.64424	P	0.422744	2.3655	down	0	RAT20778	0	mRNA	Vtcn1	V-set domain containing T cell activation inhibitor 1	NA	NA	NM_001024244	NA	NA	NA	NA_x000D_
RAT19940	5.41466	P	3.8338	A	2.99147	2.99147	up	0	RAT19940	0	mRNA	Celsr3	"cadherin, EGF LAG seven-pass G-type receptor 3 (flamingo homolog, Drosophila)"	NA	NA	NM_031320	NA	NA	NA	NA_x000D_
RAT03194	5.5175	P	6.75944	P	0.422803	2.36517	down	0	RAT03194	0	mRNA	Gypc	glycophorin C (Gerbich blood group)	NA	NA	NM_001013233	NA	NA	NA	NA_x000D_
RAT12291	7.14375	P	5.71564	P	2.69094	2.69094	up	0	RAT12291	0	mRNA	Mcart1l	mitochondrial carrier triple repeat 1-like	NA	NA	NM_001127602	NA	NA	NA	NA_x000D_
RAT05024	3.8997	A	5.35305	P	0.365172	2.73844	down	0	RAT05024	0	mRNA	Bank1	B-cell scaffold protein with ankyrin repeats 1	NA	NA	NM_001047918	NA	NA	NA	NA_x000D_
RAT29266	6.86844	P	8.57507	P	0.306375	3.26398	down	0	RAT29266	0	mRNA	RGD1309651	similar to 1190005I06Rik protein	NA	NA	ENSRNOT00000023721	NA	NA	NA	NA_x000D_
RAT28809	5.73536	P	7.08091	P	0.393503	2.54128	down	0	RAT28809	0	mRNA	LOC679404	similar to spermatogenesis associated glutamate (E)-rich protein 4d	NA	NA	XM_001056196	NA	NA	NA	NA_x000D_
RAT20303	4.33001	A	9.28372	P	0.0322691	30.9894	down	0	RAT20303	0	mRNA	Olr440	olfactory receptor 440	NA	NA	NM_001000282	NA	NA	NA	NA_x000D_
RAT18315	11.7512	P	12.8667	P	0.461536	2.16668	down	0	RAT18315	0	mRNA	NA	NA	NA	NA	NA	NA	NA	NA	NA_x000D_
RAT01111	13.57	P	12.4146	P	2.22743	2.22743	up	0	RAT01111	0	mRNA	Rpn1	ribophorin I	NA	NA	NM_013067	NA	NA	NA	NA_x000D_
RAT07126	5.23623	P	2.61489	A	6.15325	6.15325	up	0	RAT07126	0	mRNA	Nlrp12	"NLR family, pyrin domain containing 12"	NA	NA	NM_001169142	NA	NA	NA	NA_x000D_
RAT18602	6.30765	P	4.61797	A	3.22584	3.22584	up	0	RAT18602	0	mRNA	NA	NA	NA	NA	NA	NA	NA	NA	NA_x000D_
RAT15532	3.85813	A	5.71264	P	0.276526	3.6163	down	0	RAT15532	0	mRNA	RGD1560324	similar to hypothetical protein C130079G13	NA	NA	NM_001106436	NA	NA	NA	NA_x000D_
RAT25619	5.23827	P	8.20677	P	0.127759	7.82722	down	0	RAT25619	0	mRNA	Ltbp2	latent transforming growth factor beta binding protein 2	NA	NA	NM_021586	NA	NA	NA	NA_x000D_
RAT00838	9.72942	P	11.0687	P	0.395219	2.53024	down	0	RAT00838	0	mRNA	Tuba1a	"tubulin, alpha 1A"	NA	NA	NM_022298	NA	NA	NA	NA_x000D_
RAT12311	10.5791	P	8.86941	P	3.27096	3.27096	up	0	RAT12311	0	mRNA	NA	NA	NA	NA	ENSRNOT00000056712	NA	NA	NA	NA_x000D_
RAT16748	5.30558	P	4.01594	A	2.44468	2.44468	up	0	RAT16748	0	mRNA	LOC691277	similar to Robo-1	NA	NA	NM_001109633	NA	NA	NA	NA_x000D_
RAT11576	6.03669	P	7.11419	P	0.47385	2.11037	down	0	RAT11576	0	mRNA	Cdc42ep3	CDC42 effector protein (Rho GTPase binding) 3	NA	NA	NM_001048044	NA	NA	NA	NA_x000D_
RAT12418	5.31012	P	4.24428	A	2.09339	2.09339	up	0	RAT12418	0	mRNA	Tac4	tachykinin 4	NA	NA	NM_172328	NA	NA	NA	NA_x000D_
RAT11415	6.38032	P	7.95751	P	0.335134	2.98388	down	0	RAT11415	0	mRNA	NA	NA	NA	NA	ENSRNOT00000058887	NA	NA	NA	NA_x000D_
RAT18225	2.48971	A	6.53677	P	0.0604941	16.5305	down	0	RAT18225	0	mRNA	Slc16a5	"solute carrier family 16, member 5 (monocarboxylic acid transporter 6)"	NA	NA	NM_001109568	NA	NA	NA	NA_x000D_
RAT22153	5.71598	P	6.8922	P	0.442509	2.25984	down	0	RAT22153	0	mRNA	NA	NA	NA	NA	NA	NA	NA	NA	NA_x000D_
RAT12907	3.54282	A	6.34516	P	0.143355	6.9757	down	0	RAT12907	0	mRNA	NA	NA	NA	NA	TC609200	NA	NA	NA	NA_x000D_
RAT10178	8.2873	P	6.23209	P	4.15605	4.15605	up	0	RAT10178	0	mRNA	Ly6al	"lymphocyte antigen 6 complex, locus A-like"	NA	NA	NM_001128099	NA	NA	NA	NA_x000D_
RAT22304	5.38036	P	2.59541	A	6.89216	6.89216	up	0	RAT22304	0	mRNA	Otol1	otolin 1	NA	NA	ENSRNOT00000035765	NA	NA	NA	NA_x000D_
RAT08767	7.03622	P	5.90714	P	2.1872	2.1872	up	0	RAT08767	0	mRNA	Lmbrd1	LMBR1 domain containing 1	NA	NA	NM_139189	NA	NA	NA	NA_x000D_
RAT29884	9.32538	P	10.7613	P	0.369603	2.7056	down	0	RAT29884	0	mRNA	Gstp1	glutathione S-transferase pi 1	NA	NA	NM_012577	NA	NA	NA	NA_x000D_
RAT13850	6.67195	P	7.73007	P	0.480258	2.08222	down	0	RAT13850	0	mRNA	Stk35	serine/threonine kinase 35	NA	NA	NM_001107773	NA	NA	NA	NA_x000D_
RAT00558	9.82451	P	11.1289	P	0.404881	2.46986	down	0	RAT00558	0	mRNA	Cabs1	"calcium-binding protein, spermatid-specific 1"	NA	NA	NM_022263	NA	NA	NA	NA_x000D_
RAT11896	4.06108	A	6.3593	P	0.203313	4.91852	down	0	RAT11896	0	mRNA	Olr1539	olfactory receptor 1539	NA	NA	NM_001000729	NA	NA	NA	NA_x000D_
RAT23275	3.72186	A	5.43399	P	0.30521	3.27643	down	0	RAT23275	0	mRNA	Fsip2	fibrous sheath-interacting protein 2	NA	NA	ENSRNOT00000039841	NA	NA	NA	NA_x000D_
RAT12898	6.29932	P	7.69449	P	0.380202	2.63018	down	0	RAT12898	0	mRNA	Lpp	LIM domain containing preferred translocation partner in lipoma	NA	NA	NM_001013864	NA	NA	NA	NA_x000D_
RAT10836	7.1608	P	5.08358	A	4.21993	4.21993	up	0	RAT10836	0	mRNA	Trim2	tripartite motif-containing 2	NA	NA	NM_001108552	NA	NA	NA	NA_x000D_
RAT06961	5.69881	P	2.60625	A	8.53012	8.53012	up	0	RAT06961	0	mRNA	Slc38a9	"solute carrier family 38, member 9"	NA	NA	NM_001035251	NA	NA	NA	NA_x000D_
RAT12669	6.71128	P	4.6325	A	4.22451	4.22451	up	0	RAT12669	0	mRNA	Mpzl3	myelin protein zero-like 3	NA	NA	NM_001108760	NA	NA	NA	NA_x000D_
RAT12942	5.267	P	2.61792	A	6.27269	6.27269	up	0	RAT12942	0	mRNA	Fcrla	Fc receptor-like A	NA	NA	NM_001100682	NA	NA	NA	NA_x000D_
RAT18376	6.09639	P	4.79863	A	2.45847	2.45847	up	0	RAT18376	0	mRNA	Pcdh1	protocadherin 1	NA	NA	ENSRNOT00000026324	NA	NA	NA	NA_x000D_
RAT24315	7.63266	P	9.14984	P	0.349366	2.86233	down	0	RAT24315	0	mRNA	NA	NA	NA	NA	ENSRNOT00000044160	NA	NA	NA	NA_x000D_
RAT15559	9.97729	P	8.88332	P	2.1346	2.1346	up	0	RAT15559	0	mRNA	Ppapdc2	phosphatidic acid phosphatase type 2 domain containing 2	NA	NA	NM_001034854	NA	NA	NA	NA_x000D_
RAT01807	9.41909	P	8.3267	P	2.13228	2.13228	up	0	RAT01807	0	mRNA	Sec13	SEC13 homolog (S. cerevisiae)	NA	NA	NM_001006978	NA	NA	NA	NA_x000D_
RAT20238	8.13281	P	6.97176	P	2.2362	2.2362	up	0	RAT20238	0	mRNA	Tmem135	transmembrane protein 135	NA	NA	NM_001013896	NA	NA	NA	NA_x000D_
RAT18929	7.4905	P	8.65321	P	0.446673	2.23877	down	0	RAT18929	0	mRNA	RGD1563528	similar to Brain protein 44-like	NA	NA	NM_001109365	NA	NA	NA	NA_x000D_
RAT10350	7.04148	P	5.47515	P	2.96152	2.96152	up	0	RAT10350	0	mRNA	Lyve1	lymphatic vessel endothelial hyaluronan receptor 1	NA	NA	NM_001106286	NA	NA	NA	NA_x000D_
RAT03378	12.8784	P	14.4863	P	0.328081	3.04803	down	0	RAT03378	0	mRNA	RGD1304953	similar to SSTK-interacting protein	NA	NA	NM_001108556	NA	NA	NA	NA_x000D_
RAT14645	6.60839	P	7.97197	P	0.388615	2.57324	down	0	RAT14645	0	mRNA	NA	NA	NA	NA	ENSRNOT00000040473	NA	NA	NA	NA_x000D_
RAT07505	6.78941	P	4.17777	A	6.11201	6.11201	up	0	RAT07505	0	mRNA	Fam45a	"family with sequence similarity 45, member A"	NA	NA	NM_001127681	NA	NA	NA	NA_x000D_
RAT02440	9.36855	P	12.2013	P	0.140361	7.12446	down	0	RAT02440	0	mRNA	Expi	extracellular proteinase inhibitor	NA	NA	NM_133537	NA	NA	NA	NA_x000D_
RAT03104	6.90772	P	8.03386	P	0.45814	2.18274	down	0	RAT03104	0	mRNA	RGD1307595	similar to RIKEN cDNA 1700018B24	NA	NA	NM_001134511	NA	NA	NA	NA_x000D_
RAT30182	6.72851	P	5.03135	A	3.24262	3.24262	up	0	RAT30182	0	mRNA	Nat2	N-acetyltransferase 2	NA	NA	NM_053854	NA	NA	NA	NA_x000D_
RAT16298	5.21204	P	6.36655	P	0.449221	2.22608	down	0	RAT16298	0	mRNA	NA	NA	NA	NA	NA	NA	NA	NA	NA_x000D_
RAT20800	7.6665	P	6.0747	P	3.01425	3.01425	up	0	RAT20800	0	mRNA	RGD1560171	similar to PRO0149 protein	NA	NA	XM_001054786	NA	NA	NA	NA_x000D_
RAT24036	3.70008	A	5.21353	P	0.350271	2.85493	down	0	RAT24036	0	mRNA	Nr1i3	"nuclear receptor subfamily 1, group I, member 3"	NA	NA	NM_022941	NA	NA	NA	NA_x000D_
RAT02224	3.69752	A	6.02385	P	0.19939	5.01531	down	0	RAT02224	0	mRNA	Ppp1r1a	"protein phosphatase 1, regulatory (inhibitor) subunit 1A"	NA	NA	NM_022676	NA	NA	NA	NA_x000D_
RAT01698	10.2344	P	12.181	P	0.259437	3.8545	down	0	RAT01698	0	mRNA	Ifitm2	interferon induced transmembrane protein 2	NA	NA	NM_030833	NA	NA	NA	NA_x000D_
RAT20011	4.28984	A	5.47237	P	0.440578	2.26974	down	0	RAT20011	0	mRNA	LOC685095	hypothetical protein LOC685095	NA	NA	XM_001062269	NA	NA	NA	NA_x000D_
RAT05382	5.62513	P	6.98208	P	0.390405	2.56144	down	0	RAT05382	0	mRNA	Nrxn2	neurexin 2	NA	NA	NM_053846	NA	NA	NA	NA_x000D_
RAT02234	6.5476	P	4.9113	A	3.10869	3.10869	up	0	RAT02234	0	mRNA	Bche	butyrylcholinesterase	NA	NA	NM_022942	NA	NA	NA	NA_x000D_
RAT17596	6.26978	P	5.23138	P	2.05395	2.05395	up	0	RAT17596	0	mRNA	Npw	neuropeptide W	NA	NA	NM_153294	NA	NA	NA	NA_x000D_
RAT28583	5.23327	P	3.97528	A	2.39161	2.39161	up	0	RAT28583	0	mRNA	LOC683891	similar to CDC42-binding protein kinase alpha isoform B	NA	NA	XM_001061452	NA	NA	NA	NA_x000D_
RAT04913	4.63416	A	6.32806	P	0.309091	3.2353	down	0	RAT04913	0	mRNA	Stard5	StAR-related lipid transfer (START) domain containing 5	NA	NA	NM_001192011	NA	NA	NA	NA_x000D_
RAT06082	2.48149	A	5.87859	P	0.0949228	10.5349	down	0	RAT06082	0	mRNA	Aspn	asporin	NA	NA	NM_001014008	NA	NA	NA	NA_x000D_
RAT14945	9.49436	P	8.03107	P	2.75737	2.75737	up	0	RAT14945	0	mRNA	Abcd4	"ATP-binding cassette, subfamily D (ALD), member 4"	NA	NA	NM_001013100	NA	NA	NA	NA_x000D_
RAT16777	4.95696	A	6.55321	P	0.330735	3.02357	down	0	RAT16777	0	mRNA	NA	NA	NA	NA	ENSRNOT00000049208	NA	NA	NA	NA_x000D_
RAT10332	6.84324	P	9.21495	P	0.193216	5.17556	down	0	RAT10332	0	mRNA	Inhbb	inhibin beta-B	NA	NA	NM_080771	NA	NA	NA	NA_x000D_
RAT09634	9.29183	P	10.3782	P	0.470932	2.12345	down	0	RAT09634	0	mRNA	Spata24	spermatogenesis associated 24	NA	NA	NM_001025636	NA	NA	NA	NA_x000D_
RAT20286	13.0441	P	14.2438	P	0.435354	2.29698	down	0	RAT20286	0	mRNA	NA	NA	NA	NA	NA	NA	NA	NA	NA_x000D_
RAT00730	6.77636	P	5.52881	P	2.37438	2.37438	up	0	RAT00730	0	mRNA	Vps13d	vacuolar protein sorting 13 homolog D (S. cerevisiae)	NA	NA	NM_001108006	NA	NA	NA	NA_x000D_
RAT01147	7.26396	P	8.56647	P	0.405423	2.46656	down	0	RAT01147	0	mRNA	Nr4a1	"nuclear receptor subfamily 4, group A, member 1"	NA	NA	NM_024388	NA	NA	NA	NA_x000D_
RAT13468	7.53501	P	6.51952	P	2.02159	2.02159	up	0	RAT13468	0	mRNA	Yae1d1	Yae1 domain containing 1	NA	NA	NM_001107356	NA	NA	NA	NA_x000D_
RAT07933	5.85271	P	6.91218	P	0.479808	2.08417	down	0	RAT07933	0	mRNA	Il13ra1	"interleukin 13 receptor, alpha 1"	NA	NA	NM_145789	NA	NA	NA	NA_x000D_
RAT02315	6.04992	P	4.6617	A	2.61755	2.61755	up	0	RAT02315	0	mRNA	Pawr	"PRKC, apoptosis, WT1, regulator"	NA	NA	NM_033485	NA	NA	NA	NA_x000D_
RAT00490	9.04357	P	10.2498	P	0.433408	2.30729	down	0	RAT00490	0	mRNA	NA	NA	NA	NA	TC597248	NA	NA	NA	NA_x000D_
RAT28953	5.46383	P	4.0468	A	2.67036	2.67036	up	0	RAT28953	0	mRNA	Olr372	olfactory receptor 372	NA	NA	NM_001001048	NA	NA	NA	NA_x000D_
RAT29240	11.4195	P	12.4577	P	0.486946	2.05362	down	0	RAT29240	0	mRNA	NA	NA	NA	NA	NA	NA	NA	NA	NA_x000D_
RAT05330	9.72572	P	8.61997	P	2.15211	2.15211	up	0	RAT05330	0	mRNA	Serp1	stress-associated endoplasmic reticulum protein 1	NA	NA	NM_030835	NA	NA	NA	NA_x000D_
RAT16488	6.5161	P	5.33149	P	2.27301	2.27301	up	0	RAT16488	0	mRNA	NA	NA	NA	NA	NA	NA	NA	NA	NA_x000D_
RAT18165	11.3724	P	12.7165	P	0.393886	2.53881	down	0	RAT18165	0	mRNA	Tsks	testis-specific serine kinase substrate	NA	NA	NM_199088	NA	NA	NA	NA_x000D_
RAT22860	7.42647	P	9.71547	P	0.204618	4.88716	down	0	RAT22860	0	mRNA	Rspo1	R-spondin 1	NA	NA	NM_001107980	NA	NA	NA	NA_x000D_
RAT21003	3.96664	A	5.16305	P	0.436359	2.29169	down	0	RAT21003	0	mRNA	Olr1193	olfactory receptor 1193	NA	NA	NM_001000594	NA	NA	NA	NA_x000D_
RAT01151	7.55361	P	8.68625	P	0.456078	2.19261	down	0	RAT01151	0	mRNA	Ccl27	chemokine (C-C motif) ligand 27	NA	NA	NM_001108660	NA	NA	NA	NA_x000D_
RAT05655	5.45286	P	6.46351	P	0.496323	2.01482	down	0	RAT05655	0	mRNA	Tmem100	transmembrane protein 100	NA	NA	NM_001017479	NA	NA	NA	NA_x000D_
RAT15633	4.32137	A	6.22432	P	0.267397	3.73976	down	0	RAT15633	0	mRNA	Lmo1	LIM domain only 1	NA	NA	NM_139112	NA	NA	NA	NA_x000D_
RAT21397	13.7631	P	12.6611	P	2.14642	2.14642	up	0	RAT21397	0	mRNA	NA	NA	NA	NA	NA	NA	NA	NA	NA_x000D_
RAT19419	6.57399	P	4.31843	A	4.7752	4.7752	up	0	RAT19419	0	mRNA	NA	NA	NA	NA	NA	NA	NA	NA	NA_x000D_
RAT12022	10.6781	P	12.6712	P	0.2512	3.9809	down	0	RAT12022	0	mRNA	LOC689766	hypothetical protein LOC689766	NA	NA	NM_001109549	NA	NA	NA	NA_x000D_
RAT23388	7.81729	P	8.88103	P	0.47839	2.09034	down	0	RAT23388	0	mRNA	Tubb2a	"tubulin, beta 2A class IIa"	NA	NA	NM_001109119	NA	NA	NA	NA_x000D_
RAT11753	2.47008	A	5.2936	P	0.141265	7.07888	down	0	RAT11753	0	mRNA	Wisp1	WNT1 inducible signaling pathway protein 1	NA	NA	NM_031716	NA	NA	NA	NA_x000D_
RAT11550	10.8352	P	9.40531	P	2.69429	2.69429	up	0	RAT11550	0	mRNA	Sgpp1	sphingosine-1-phosphate phosphatase 1	NA	NA	XM_001080791	NA	NA	NA	NA_x000D_
RAT04497	8.11392	P	9.28378	P	0.444465	2.24989	down	0	RAT04497	0	mRNA	RGD1566314	similar to KIAA1407	NA	NA	ENSRNOT00000027087	NA	NA	NA	NA_x000D_
RAT11996	10.8089	P	12.9204	P	0.231413	4.32127	down	0	RAT11996	0	mRNA	Tbc1d5	"TBC1 domain family, member 5"	NA	NA	NM_001134762	NA	NA	NA	NA_x000D_
RAT11098	5.451	P	6.59769	P	0.451659	2.21406	down	0	RAT11098	0	mRNA	Fibin	fin bud initiation factor homolog (zebrafish)	NA	NA	NM_001025042	NA	NA	NA	NA_x000D_
RAT10014	8.62078	P	7.56792	P	2.07463	2.07463	up	0	RAT10014	0	mRNA	Casp6	caspase 6	NA	NA	NM_031775	NA	NA	NA	NA_x000D_
RAT12853	7.37098	P	8.71954	P	0.392684	2.54658	down	0	RAT12853	0	mRNA	NA	NA	NA	NA	ENSRNOT00000059076	NA	NA	NA	NA_x000D_
RAT00001	7.68914	P	9.44034	P	0.297053	3.3664	down	0	RAT00001	0	mRNA	Bcam	basal cell adhesion molecule	NA	NA	NM_031752	NA	NA	NA	NA_x000D_
RAT21579	2.5389	A	5.34128	P	0.143351	6.9759	down	0	RAT21579	0	mRNA	NA	NA	NA	NA	ENSRNOT00000050854	NA	NA	NA	NA_x000D_
RAT02127	8.07961	P	6.51007	P	2.96809	2.96809	up	0	RAT02127	0	mRNA	Pxmp3	peroxisomal membrane protein 3	NA	NA	NM_017234	NA	NA	NA	NA_x000D_
RAT08666	7.84041	P	8.96439	P	0.458824	2.17948	down	0	RAT08666	0	mRNA	Spata21	spermatogenesis associated 21	NA	NA	NM_001004447	NA	NA	NA	NA_x000D_
RAT14302	6.51279	P	7.76716	P	0.419179	2.38562	down	0	RAT14302	0	mRNA	NA	NA	NA	NA	BI293000	NA	NA	NA	NA_x000D_
RAT20504	6.43916	P	7.98381	P	0.342778	2.91734	down	0	RAT20504	0	mRNA	NA	NA	NA	NA	ENSRNOT00000049270	NA	NA	NA	NA_x000D_
RAT00247	5.31992	P	4.3151	A	2.00669	2.00669	up	0	RAT00247	0	mRNA	Ptpn5	"protein tyrosine phosphatase, non-receptor type 5"	NA	NA	NM_019253	NA	NA	NA	NA_x000D_
RAT13080	12.2306	P	13.3808	P	0.45058	2.21936	down	0	RAT13080	0	mRNA	LOC681776	similar to High mobility group protein 1 (HMG-1) (High mobility group protein B1) (Amphoterin) (Heparin-binding protein p30)	NA	NA	XM_002725357	NA	NA	NA	NA_x000D_
RAT07464	5.06761	A	7.22177	P	0.224665	4.45107	down	0	RAT07464	0	mRNA	S100a9	S100 calcium binding protein A9	NA	NA	NM_053587	NA	NA	NA	NA_x000D_
RAT11844	11.7391	P	13.3491	P	0.327599	3.05252	down	0	RAT11844	0	mRNA	NA	NA	NA	NA	NA	NA	NA	NA	NA_x000D_
RAT26928	8.84787	P	9.89464	P	0.484049	2.06591	down	0	RAT26928	0	mRNA	Cxcl16	chemokine (C-X-C motif) ligand 16	NA	NA	NM_001017478	NA	NA	NA	NA_x000D_
RAT26079	6.16907	P	3.26544	A	7.48307	7.48307	up	0	RAT26079	0	mRNA	NA	NA	NA	NA	ENSRNOT00000068427	NA	NA	NA	NA_x000D_
RAT04746	5.39468	P	4.31792	A	2.10929	2.10929	up	0	RAT04746	0	mRNA	Zfp709	zinc finger protein 709	NA	NA	NM_153731	NA	NA	NA	NA_x000D_
RAT29649	5.32391	P	3.92804	A	2.63148	2.63148	up	0	RAT29649	0	mRNA	Olr98	olfactory receptor 98	NA	NA	NM_001000143	NA	NA	NA	NA_x000D_
RAT19829	5.70274	P	4.07195	A	3.09682	3.09682	up	0	RAT19829	0	mRNA	NA	NA	NA	NA	NA	NA	NA	NA	NA_x000D_
RAT01778	7.60369	P	6.13551	P	2.76674	2.76674	up	0	RAT01778	0	mRNA	NA	NA	NA	NA	ENSRNOT00000016262	NA	NA	NA	NA_x000D_
RAT25345	6.00411	P	7.31219	P	0.403859	2.47611	down	0	RAT25345	0	mRNA	NA	NA	NA	NA	NA	NA	NA	NA	NA_x000D_
RAT19955	5.95997	P	3.77589	A	4.54439	4.54439	up	0	RAT19955	0	mRNA	RGD1564031	"similar to transcription elongation factor B (SIII), polypeptide 2"	NA	NA	XM_001081217	NA	NA	NA	NA_x000D_
RAT19556	14.8935	P	13.8289	P	2.09149	2.09149	up	0	RAT19556	0	mRNA	Aldh1a1	"aldehyde dehydrogenase 1 family, member A1"	NA	NA	NM_022407	NA	NA	NA	NA_x000D_
RAT10367	8.30671	P	7.27812	P	2.04003	2.04003	up	0	RAT10367	0	mRNA	Arnt2	aryl hydrocarbon receptor nuclear translocator 2	NA	NA	NM_012781	NA	NA	NA	NA_x000D_
RAT20844	8.0547	P	9.19055	P	0.455065	2.19749	down	0	RAT20844	0	mRNA	Fam170a	"family with sequence similarity 170, member A"	NA	NA	NM_001126293	NA	NA	NA	NA_x000D_
RAT05369	6.31717	P	5.11974	A	2.2933	2.2933	up	0	RAT05369	0	mRNA	Traf3ip3	TRAF3 interacting protein 3	NA	NA	NM_001014132	NA	NA	NA	NA_x000D_
RAT14100	8.37256	P	9.84628	P	0.360054	2.77736	down	0	RAT14100	0	mRNA	Wdr44	WD repeat domain 44	NA	NA	XM_001061437	NA	NA	NA	NA_x000D_
RAT04487	5.9351	P	4.90301	A	2.04499	2.04499	up	0	RAT04487	0	mRNA	Tmx4	thioredoxin-related transmembrane protein 4	NA	NA	NM_001100529	NA	NA	NA	NA_x000D_
RAT21912	7.902	P	9.74038	P	0.279636	3.57608	down	0	RAT21912	0	mRNA	LOC685796	similar to similar to RIKEN cDNA 1700001E04	NA	NA	XM_001065304	NA	NA	NA	NA_x000D_
RAT11780	7.06546	P	8.78795	P	0.303025	3.30005	down	0	RAT11780	0	mRNA	Mxra7	matrix-remodelling associated 7	NA	NA	ENSRNOT00000066137	NA	NA	NA	NA_x000D_
RAT09008	7.50477	P	8.65573	P	0.450327	2.22061	down	0	RAT09008	0	mRNA	Lpin1	lipin 1	NA	NA	NM_001012111	NA	NA	NA	NA_x000D_
RAT09073	5.71168	P	2.47162	A	9.44834	9.44834	up	0	RAT09073	0	mRNA	Sash3	SAM and SH3 domain containing 3	NA	NA	NM_001134992	NA	NA	NA	NA_x000D_
RAT02609	10.2528	P	9.09746	P	2.22739	2.22739	up	0	RAT02609	0	mRNA	Slc29a1	"solute carrier family 29 (nucleoside transporters), member 1"	NA	NA	NM_031684	NA	NA	NA	NA_x000D_
RAT01337	6.05668	P	2.46212	A	12.0801	12.0801	up	0	RAT01337	0	mRNA	Epdr1	ependymin related protein 1 (zebrafish)	NA	NA	NM_001007625	NA	NA	NA	NA_x000D_
RAT28600	6.23055	P	4.8678	A	2.57174	2.57174	up	0	RAT28600	0	mRNA	Armc1	armadillo repeat containing 1	NA	NA	NM_001106425	NA	NA	NA	NA_x000D_
RAT28448	2.58318	A	5.78882	P	0.108394	9.22558	down	0	RAT28448	0	mRNA	NA	NA	NA	NA	ENSRNOT00000059741	NA	NA	NA	NA_x000D_
RAT01829	8.62716	P	9.82637	P	0.435514	2.29614	down	0	RAT01829	0	mRNA	LOC688893	hypothetical protein LOC688893	NA	NA	ENSRNOT00000033124	NA	NA	NA	NA_x000D_
RAT08234	2.53183	A	6.86709	P	0.0495401	20.1857	down	0	RAT08234	0	mRNA	Olr96	olfactory receptor 96	NA	NA	NM_001001025	NA	NA	NA	NA_x000D_
RAT17768	7.83072	P	10.1818	P	0.196	5.10203	down	0	RAT17768	0	mRNA	Dpp4	dipeptidylpeptidase 4	NA	NA	NM_012789	NA	NA	NA	NA_x000D_
RAT23580	5.78527	P	4.62343	A	2.23742	2.23742	up	0	RAT23580	0	mRNA	Sall2	sal-like 2 (Drosophila)	NA	NA	NM_001107262	NA	NA	NA	NA_x000D_
RAT05944	6.31399	P	4.41747	A	3.72313	3.72313	up	0	RAT05944	0	mRNA	Amigo2	adhesion molecule with Ig like domain 2	NA	NA	NM_182816	NA	NA	NA	NA_x000D_
RAT26169	13.3889	P	15.2707	P	0.271358	3.68517	down	0	RAT26169	0	mRNA	Prm3	protamine 3	NA	NA	NM_001002855	NA	NA	NA	NA_x000D_
RAT11573	6.29243	P	8.50711	P	0.215434	4.64179	down	0	RAT11573	0	mRNA	Nrn1l	neuritin 1-like	NA	NA	NM_001135006	NA	NA	NA	NA_x000D_
RAT18781	5.26932	P	3.38318	A	3.69646	3.69646	up	0	RAT18781	0	mRNA	Reg4	"regenerating islet-derived family, member 4"	NA	NA	NM_001004096	NA	NA	NA	NA_x000D_
RAT06280	6.9161	P	5.84741	P	2.09752	2.09752	up	0	RAT06280	0	mRNA	Bbs7	Bardet-Biedl syndrome 7	NA	NA	NM_001012180	NA	NA	NA	NA_x000D_
RAT09584	5.69967	P	7.32647	P	0.323805	3.08828	down	0	RAT09584	0	mRNA	Dmc1	"DMC1 dosage suppressor of mck1 homolog, meiosis-specific homologous recombination (yeast)"	NA	NA	NM_001130567	NA	NA	NA	NA_x000D_
RAT03182	7.29196	P	8.81123	P	0.348863	2.86646	down	0	RAT03182	0	mRNA	Ipo11	importin 11	NA	NA	XM_002725887	NA	NA	NA	NA_x000D_
RAT09516	2.55027	A	5.40979	P	0.137784	7.25771	down	0	RAT09516	0	mRNA	Rassf9	Ras association (RalGDS/AF-6) domain family (N-terminal) member 9	NA	NA	NM_022959	NA	NA	NA	NA_x000D_
RAT04727	5.19524	P	4.01665	A	2.26355	2.26355	up	0	RAT04727	0	mRNA	Slc38a6	"solute carrier family 38, member 6"	NA	NA	NM_001013099	NA	NA	NA	NA_x000D_
RAT13105	6.52904	P	5.47386	P	2.07797	2.07797	up	0	RAT13105	0	mRNA	Peo1	progressive external ophthalmoplegia 1	NA	NA	NM_001107599	NA	NA	NA	NA_x000D_
RAT27461	13.3459	P	14.7336	P	0.382166	2.61666	down	0	RAT27461	0	mRNA	NA	NA	NA	NA	TC635273	NA	NA	NA	NA_x000D_
RAT01991	8.52693	P	7.34638	P	2.26663	2.26663	up	0	RAT01991	0	mRNA	Timm21	translocase of inner mitochondrial membrane 21 homolog (yeast)	NA	NA	NM_001008343	NA	NA	NA	NA_x000D_
RAT15601	12.0257	P	13.3511	P	0.399036	2.50604	down	0	RAT15601	0	mRNA	LOC100365120	hypothetical protein LOC100365120	NA	NA	XM_002724847	NA	NA	NA	NA_x000D_
RAT26873	5.30079	P	2.52354	A	6.85547	6.85547	up	0	RAT26873	0	mRNA	Olr595	olfactory receptor 595	NA	NA	NM_001006596	NA	NA	NA	NA_x000D_
RAT02190	9.70164	P	8.60795	P	2.13419	2.13419	up	0	RAT02190	0	mRNA	Lgmn	legumain	NA	NA	NM_022226	NA	NA	NA	NA_x000D_
RAT10579	5.5355	P	2.57883	A	7.76328	7.76328	up	0	RAT10579	0	mRNA	Zic4	Zic family member 4	NA	NA	NM_001108176	NA	NA	NA	NA_x000D_
RAT26724	3.96578	A	5.4047	P	0.368842	2.71119	down	0	RAT26724	0	mRNA	NA	NA	NA	NA	NA	NA	NA	NA	NA_x000D_
RAT13612	8.36209	P	9.52404	P	0.446909	2.23759	down	0	RAT13612	0	mRNA	Myo1f	myosin IF	NA	NA	NM_001108076	NA	NA	NA	NA_x000D_
RAT27794	6.6972	P	7.93082	P	0.425249	2.35157	down	0	RAT27794	0	mRNA	Cmtm1	CKLF-like MARVEL transmembrane domain containing 1	NA	NA	NM_001029914	NA	NA	NA	NA_x000D_
RAT06366	5.87326	P	7.13791	P	0.416201	2.40268	down	0	RAT06366	0	mRNA	Sh3gl3	SH3-domain GRB2-like 3	NA	NA	NM_031238	NA	NA	NA	NA_x000D_
RAT07442	6.50141	P	4.60781	A	3.71559	3.71559	up	0	RAT07442	0	mRNA	Cldn10	claudin 10	NA	NA	NM_001106058	NA	NA	NA	NA_x000D_
RAT08600	6.04344	P	7.21391	P	0.444276	2.25085	down	0	RAT08600	0	mRNA	Arl15	ADP-ribosylation factor-like 15	NA	NA	ENSRNOT00000014761	NA	NA	NA	NA_x000D_
RAT28008	6.54684	P	8.47914	P	0.262012	3.81662	down	0	RAT28008	0	mRNA	Sik1	salt-inducible kinase 1	NA	NA	NM_021693	NA	NA	NA	NA_x000D_
RAT25712	5.44165	P	2.51945	A	7.58001	7.58001	up	0	RAT25712	0	mRNA	Vom2r37	"vomeronasal 2 receptor, 37"	NA	NA	NM_001099487	NA	NA	NA	NA_x000D_
RAT17863	5.33104	P	8.04086	P	0.152849	6.54243	down	0	RAT17863	0	mRNA	Zbtb7c	zinc finger and BTB domain containing 7C	NA	NA	NM_001127375	NA	NA	NA	NA_x000D_
RAT08342	5.96189	P	3.70372	A	4.78383	4.78383	up	0	RAT08342	0	mRNA	NA	NA	NA	NA	ENSRNOT00000031161	NA	NA	NA	NA_x000D_
RAT22618	6.14688	P	4.06646	A	4.22932	4.22932	up	0	RAT22618	0	mRNA	RGD1562551	similar to C20orf82	NA	NA	NM_001134552	NA	NA	NA	NA_x000D_
RAT27087	6.5109	P	2.97998	A	11.5588	11.5588	up	0	RAT27087	0	mRNA	Mettl11b	methyltransferase like 11B	NA	NA	ENSRNOT00000039581	NA	NA	NA	NA_x000D_
RAT16410	6.76743	P	7.88828	P	0.459823	2.17475	down	0	RAT16410	0	mRNA	LOC100361882	rCG56785-like	NA	NA	XM_002730111	NA	NA	NA	NA_x000D_
RAT06000	3.36115	A	5.15088	P	0.289226	3.4575	down	0	RAT06000	0	mRNA	NA	NA	NA	NA	ENSRNOT00000016784	NA	NA	NA	NA_x000D_
RAT13421	7.56746	P	5.99272	P	2.97882	2.97882	up	0	RAT13421	0	mRNA	NA	NA	NA	NA	ENSRNOT00000028328	NA	NA	NA	NA_x000D_
RAT19534	7.6122	P	6.45268	P	2.23382	2.23382	up	0	RAT19534	0	mRNA	Acot4	acyl-CoA thioesterase 4	NA	NA	NM_001109440	NA	NA	NA	NA_x000D_
RAT00583	4.14647	A	6.43858	P	0.204177	4.89771	down	0	RAT00583	0	mRNA	Msx1	msh homeobox 1	NA	NA	NM_031059	NA	NA	NA	NA_x000D_
RAT19992	12.9691	P	14.2134	P	0.422114	2.36903	down	0	RAT19992	0	mRNA	RGD1563941	similar to hypothetical protein FLJ20010	NA	NA	NM_001109293	NA	NA	NA	NA_x000D_
RAT20654	4.96397	A	6.06366	P	0.466617	2.14308	down	0	RAT20654	0	mRNA	NA	NA	NA	NA	NA	NA	NA	NA	NA_x000D_
RAT10622	8.67092	P	7.50161	P	2.24904	2.24904	up	0	RAT10622	0	mRNA	Eif1ax	"eukaryotic translation initiation factor 1A, X-linked"	NA	NA	NM_001106963	NA	NA	NA	NA_x000D_
RAT17670	5.33835	P	7.19852	P	0.275444	3.6305	down	0	RAT17670	0	mRNA	Fosl2	fos-like antigen 2	NA	NA	NM_012954	NA	NA	NA	NA_x000D_
RAT19699	5.15493	P	2.49655	A	6.31324	6.31324	up	0	RAT19699	0	mRNA	Ces1a	carboxylesterase 1A	NA	NA	NM_001190375	NA	NA	NA	NA_x000D_
RAT28355	6.1261	P	4.59526	A	2.88955	2.88955	up	0	RAT28355	0	mRNA	Pard3b	par-3 partitioning defective 3 homolog B (C. elegans)	NA	NA	NM_001191808	NA	NA	NA	NA_x000D_
RAT06161	9.10963	P	7.71633	P	2.62679	2.62679	up	0	RAT06161	0	mRNA	RGD1561490	"similar to Adaptor-related protein complex 1, mu 2 subunit (AP1M2)"	NA	NA	NM_001108996	NA	NA	NA	NA_x000D_
RAT03489	7.48434	P	9.30998	P	0.282116	3.54464	down	0	RAT03489	0	mRNA	Ctsk	cathepsin K	NA	NA	NM_031560	NA	NA	NA	NA_x000D_
RAT12899	10.2691	P	11.3724	P	0.46545	2.14846	down	0	RAT12899	0	mRNA	Zfp385a	zinc finger protein 385A	NA	NA	NM_001135088	NA	NA	NA	NA_x000D_
RAT17834	6.2881	P	2.44985	A	14.3031	14.3031	up	0	RAT17834	0	mRNA	Cys1	cystin 1	NA	NA	NM_001109597	NA	NA	NA	NA_x000D_
RAT12796	12.7152	P	15.011	P	0.203647	4.91046	down	0	RAT12796	0	mRNA	NA	NA	NA	NA	TC640133	NA	NA	NA	NA_x000D_
RAT00107	7.05074	P	5.65782	P	2.6261	2.6261	up	0	RAT00107	0	mRNA	Egr2	early growth response 2	NA	NA	NM_053633	NA	NA	NA	NA_x000D_
RAT28113	3.32335	A	5.66611	P	0.197132	5.07275	down	0	RAT28113	0	mRNA	NA	NA	NA	NA	NA	NA	NA	NA	NA_x000D_
RAT01586	6.67286	P	5.66673	P	2.00852	2.00852	up	0	RAT01586	0	mRNA	RGD1305713	similar to RIKEN cDNA 3110040N11	NA	NA	NM_001024749	NA	NA	NA	NA_x000D_
RAT11874	6.71449	P	7.81571	P	0.46612	2.14537	down	0	RAT11874	0	mRNA	NA	NA	NA	NA	NA	NA	NA	NA	NA_x000D_
RAT05180	8.76181	P	10.1222	P	0.38949	2.56746	down	0	RAT05180	0	mRNA	Akap12	A kinase (PRKA) anchor protein 12	NA	NA	NM_057103	NA	NA	NA	NA_x000D_
RAT26765	8.08474	P	6.52839	P	2.9411	2.9411	up	0	RAT26765	0	mRNA	Cxcl12	chemokine (C-X-C motif) ligand 12	NA	NA	NM_022177	NA	NA	NA	NA_x000D_
RAT00653	8.71954	P	7.09336	P	3.08693	3.08693	up	0	RAT00653	0	mRNA	Rab25	"RAB25, member RAS oncogene family"	NA	NA	NM_001107687	NA	NA	NA	NA_x000D_
RAT25826	8.96567	P	7.96292	P	2.00381	2.00381	up	0	RAT25826	0	mRNA	Fam49b	"family with sequence similarity 49, member B"	NA	NA	NM_001126267	NA	NA	NA	NA_x000D_
RAT28455	5.61703	P	4.37618	A	2.36338	2.36338	up	0	RAT28455	0	mRNA	NA	NA	NA	NA	NA	NA	NA	NA	NA_x000D_
RAT08461	6.33235	P	7.8061	P	0.360044	2.77744	down	0	RAT08461	0	mRNA	Hmgcs2	3-hydroxy-3-methylglutaryl-CoA synthase 2 (mitochondrial)	NA	NA	NM_173094	NA	NA	NA	NA_x000D_
RAT17895	8.26098	P	10.5791	P	0.200526	4.98689	down	0	RAT17895	0	mRNA	Il16	interleukin 16	NA	NA	NM_001105749	NA	NA	NA	NA_x000D_
RAT11414	6.67751	P	8.17032	P	0.355322	2.81435	down	0	RAT11414	0	mRNA	NA	NA	NA	NA	TC605231	NA	NA	NA	NA_x000D_
RAT17098	3.83283	A	5.4381	P	0.328674	3.04253	down	0	RAT17098	0	mRNA	Vom2r22	"vomeronasal 2 receptor, 22"	NA	NA	NM_001099656	NA	NA	NA	NA_x000D_
RAT01101	6.1348	P	4.72213	A	2.66228	2.66228	up	0	RAT01101	0	mRNA	Ppm1d	"protein phosphatase, Mg2+/Mn2+ dependent, 1D"	NA	NA	NM_001105825	NA	NA	NA	NA_x000D_
RAT00772	5.61134	P	7.06084	P	0.366149	2.73112	down	0	RAT00772	0	mRNA	Fiz1	FLT3-interacting zinc finger 1	NA	NA	NM_001106223	NA	NA	NA	NA_x000D_
RAT20689	5.72752	P	4.35496	A	2.58928	2.58928	up	0	RAT20689	0	mRNA	Vom2r47	"vomeronasal 2 receptor, 47"	NA	NA	NM_001099506	NA	NA	NA	NA_x000D_
RAT08378	6.71387	P	4.48574	A	4.68527	4.68527	up	0	RAT08378	0	mRNA	NA	NA	NA	NA	ENSRNOT00000051382	NA	NA	NA	NA_x000D_
RAT08161	9.45877	P	8.45234	P	2.00893	2.00893	up	0	RAT08161	0	mRNA	Ndufa9	"NADH dehydrogenase (ubiquinone) 1 alpha subcomplex, 9"	NA	NA	NM_001100752	NA	NA	NA	NA_x000D_
RAT07135	7.21834	P	8.23483	P	0.494316	2.023	down	0	RAT07135	0	mRNA	Mtm1	myotubularin 1	NA	NA	NM_001013047	NA	NA	NA	NA_x000D_
RAT08664	9.58411	P	11.3287	P	0.298422	3.35096	down	0	RAT08664	0	mRNA	RGD1306195	similar to RAN protein	NA	NA	NM_001014062	NA	NA	NA	NA_x000D_
RAT27004	2.45653	A	5.6354	P	0.110424	9.05599	down	0	RAT27004	0	mRNA	NA	NA	NA	NA	NA	NA	NA	NA	NA_x000D_
RAT06235	7.6468	P	6.30811	P	2.52922	2.52922	up	0	RAT06235	0	mRNA	Prps1	phosphoribosyl pyrophosphate synthetase 1	NA	NA	NM_017243	NA	NA	NA	NA_x000D_
RAT13277	9.31402	P	10.4349	P	0.45981	2.17481	down	0	RAT13277	0	mRNA	Cckbr	cholecystokinin B receptor	NA	NA	NM_013165	NA	NA	NA	NA_x000D_
RAT03355	4.9269	A	6.47455	P	0.342066	2.92341	down	0	RAT03355	0	mRNA	Ccl26	chemokine (C-C motif) ligand 26	NA	NA	NM_001109488	NA	NA	NA	NA_x000D_
RAT15166	2.56517	A	6.29957	P	0.0751337	13.3096	down	0	RAT15166	0	mRNA	LOC679314	hypothetical protein LOC679314	NA	NA	XM_001055778	NA	NA	NA	NA_x000D_
RAT12196	6.87859	P	4.10329	A	6.84619	6.84619	up	0	RAT12196	0	mRNA	LOC100361814	ribonuclease 16-like	NA	NA	ENSRNOT00000060596	NA	NA	NA	NA_x000D_
RAT18450	6.45361	P	7.57543	P	0.459512	2.17622	down	0	RAT18450	0	mRNA	Wdr27	WD repeat domain 27	NA	NA	ENSRNOT00000021141	NA	NA	NA	NA_x000D_
RAT18899	5.82695	P	3.45638	A	5.17145	5.17145	up	0	RAT18899	0	mRNA	Entpd2	ectonucleoside triphosphate diphosphohydrolase 2	NA	NA	NM_172030	NA	NA	NA	NA_x000D_
RAT13014	6.53835	P	5.43706	P	2.14547	2.14547	up	0	RAT13014	0	mRNA	Foxr2	forkhead box R2	NA	NA	ENSRNOT00000043382	NA	NA	NA	NA_x000D_
RAT24961	2.5667	A	6.02145	P	0.0912045	10.9644	down	0	RAT24961	0	mRNA	NA	NA	NA	NA	NA	NA	NA	NA	NA_x000D_
RAT04087	13.1414	P	11.7017	P	2.71277	2.71277	up	0	RAT04087	0	mRNA	Hspa5	heat shock protein 5	NA	NA	NM_013083	NA	NA	NA	NA_x000D_
RAT10770	8.22178	P	6.85128	P	2.58562	2.58562	up	0	RAT10770	0	mRNA	Ppp1r3d	"protein phosphatase 1, regulatory subunit 3D"	NA	NA	NM_001109564	NA	NA	NA	NA_x000D_
RAT06938	5.68835	P	4.11991	A	2.96582	2.96582	up	0	RAT06938	0	mRNA	Spryd4	SPRY domain containing 4	NA	NA	NM_001037765	NA	NA	NA	NA_x000D_
RAT09072	4.0921	A	5.32366	P	0.425859	2.3482	down	0	RAT09072	0	mRNA	Mybl1	myeloblastosis oncogene-like 1	NA	NA	NM_001106632	NA	NA	NA	NA_x000D_
RAT10694	6.67951	P	4.93293	A	3.35562	3.35562	up	0	RAT10694	0	mRNA	Eif4e	eukaryotic translation initiation factor 4E	NA	NA	NM_053974	NA	NA	NA	NA_x000D_
RAT09563	8.64703	P	7.59392	P	2.075	2.075	up	0	RAT09563	0	mRNA	Neu1	sialidase 1 (lysosomal sialidase)	NA	NA	NM_031522	NA	NA	NA	NA_x000D_
RAT10144	7.3112	P	6.03188	P	2.42724	2.42724	up	0	RAT10144	0	mRNA	Il18bp	interleukin 18 binding protein	NA	NA	NM_053374	NA	NA	NA	NA_x000D_
RAT15150	5.53047	P	2.53935	A	7.95088	7.95088	up	0	RAT15150	0	mRNA	RGD1304879	similar to Zinc finger protein 398 (Zinc finger DNA binding protein p52/p71)	NA	NA	NM_001014056	NA	NA	NA	NA_x000D_
RAT22593	5.17297	P	3.18654	A	3.96257	3.96257	up	0	RAT22593	0	mRNA	NA	NA	NA	NA	TC600267	NA	NA	NA	NA_x000D_
RAT13057	7.25101	P	5.52944	P	3.29795	3.29795	up	0	RAT13057	0	mRNA	Vom1r40	vomeronasal 1 receptor 40	NA	NA	NM_001008904	NA	NA	NA	NA_x000D_
RAT00163	8.2486	P	10.1305	P	0.271334	3.68549	down	0	RAT00163	0	mRNA	Agtr1a	"angiotensin II receptor, type 1a"	NA	NA	NM_030985	NA	NA	NA	NA_x000D_
RAT10977	5.97996	P	7.17495	P	0.436788	2.28944	down	0	RAT10977	0	mRNA	Emp1	epithelial membrane protein 1	NA	NA	NM_012843	NA	NA	NA	NA_x000D_
RAT00575	5.83299	P	7.43276	P	0.32993	3.03094	down	0	RAT00575	0	mRNA	Epha2	Eph receptor A2	NA	NA	NM_001108977	NA	NA	NA	NA_x000D_
RAT03162	4.29075	A	5.43414	P	0.452695	2.20899	down	0	RAT03162	0	mRNA	Cinp	cyclin-dependent kinase 2-interacting protein	NA	NA	NM_001106758	NA	NA	NA	NA_x000D_
RAT15611	8.69705	P	7.65951	P	2.05274	2.05274	up	0	RAT15611	0	mRNA	NA	NA	NA	NA	NA	NA	NA	NA	NA_x000D_
RAT02182	5.96259	P	4.55847	A	2.64657	2.64657	up	0	RAT02182	0	mRNA	Gnb3	"guanine nucleotide binding protein (G protein), beta polypeptide 3"	NA	NA	NM_021858	NA	NA	NA	NA_x000D_
RAT23607	11.6344	P	14.4507	P	0.141972	7.04365	down	0	RAT23607	0	mRNA	NA	NA	NA	NA	NA	NA	NA	NA	NA_x000D_
RAT18088	5.06718	A	6.80309	P	0.30022	3.33089	down	0	RAT18088	0	mRNA	NA	NA	NA	NA	ENSRNOT00000057542	NA	NA	NA	NA_x000D_
RAT01673	6.95825	P	5.68295	P	2.42049	2.42049	up	0	RAT01673	0	mRNA	Agpat5	"1-acylglycerol-3-phosphate O-acyltransferase 5 (lysophosphatidic acid acyltransferase, epsilon)"	NA	NA	NM_001134744	NA	NA	NA	NA_x000D_
RAT15781	9.336	P	10.3522	P	0.494405	2.02263	down	0	RAT15781	0	mRNA	Rims3	regulating synaptic membrane exocytosis 3	NA	NA	NM_022931	NA	NA	NA	NA_x000D_
RAT17732	7.37245	P	8.72129	P	0.392606	2.54708	down	0	RAT17732	0	mRNA	Trak1	"trafficking protein, kinesin binding 1"	NA	NA	NM_001134565	NA	NA	NA	NA_x000D_
RAT25862	7.34587	P	9.28947	P	0.259967	3.84664	down	0	RAT25862	0	mRNA	LOC498276	Fc gamma receptor II beta	NA	NA	NM_001135992	NA	NA	NA	NA_x000D_
RAT20360	5.62804	P	4.39449	A	2.35145	2.35145	up	0	RAT20360	0	mRNA	Bpifb1	"BPI fold containing family B, member 1"	NA	NA	NM_001077680	NA	NA	NA	NA_x000D_
RAT28658	2.44754	A	5.35743	P	0.133056	7.51564	down	0	RAT28658	0	mRNA	NA	NA	NA	NA	NA	NA	NA	NA	NA_x000D_
RAT00706	7.30543	P	5.96296	P	2.53585	2.53585	up	0	RAT00706	0	mRNA	Cdhr1	cadherin-related family member 1	NA	NA	NM_053572	NA	NA	NA	NA_x000D_
RAT18234	10.2258	P	11.4026	P	0.442333	2.26074	down	0	RAT18234	0	mRNA	Itgb4	"integrin, beta 4"	NA	NA	NM_013180	NA	NA	NA	NA_x000D_
RAT12695	3.5387	A	6.16497	P	0.161963	6.17426	down	0	RAT12695	0	mRNA	LOC689962	hypothetical protein LOC689962	NA	NA	ENSRNOT00000013882	NA	NA	NA	NA_x000D_
RAT16350	6.93582	P	8.00081	P	0.477977	2.09215	down	0	RAT16350	0	mRNA	Il2rg	"interleukin 2 receptor, gamma"	NA	NA	ENSRNOT00000050415	NA	NA	NA	NA_x000D_
RAT20014	7.30148	P	10.345	P	0.121289	8.24477	down	0	RAT20014	0	mRNA	Lrrn4	leucine rich repeat neuronal 4	NA	NA	XM_001081242	NA	NA	NA	NA_x000D_
RAT26826	7.17609	P	8.20234	P	0.490984	2.03673	down	0	RAT26826	0	mRNA	NA	NA	NA	NA	NA	NA	NA	NA	NA_x000D_
RAT02594	11.4542	P	10.3812	P	2.10382	2.10382	up	0	RAT02594	0	mRNA	Tmbim4	transmembrane BAX inhibitor motif containing 4	NA	NA	NM_199116	NA	NA	NA	NA_x000D_
RAT25970	4.17616	A	5.35686	P	0.441136	2.26687	down	0	RAT25970	0	mRNA	Arhgef26	Rho guanine nucleotide exchange factor (GEF) 26	NA	NA	ENSRNOT00000019553	NA	NA	NA	NA_x000D_
RAT29692	6.1945	P	8.46807	P	0.206818	4.83518	down	0	RAT29692	0	mRNA	NA	NA	NA	NA	ENSRNOT00000037181	NA	NA	NA	NA_x000D_
RAT18105	10.8976	P	9.6798	P	2.32587	2.32587	up	0	RAT18105	0	mRNA	Tmem164	transmembrane protein 164	NA	NA	NM_001109014	NA	NA	NA	NA_x000D_
RAT12493	5.58709	P	6.7661	P	0.441654	2.26422	down	0	RAT12493	0	mRNA	Dact3	"dapper, antagonist of beta-catenin, homolog 3 (Xenopus laevis)"	NA	NA	NM_001191947	NA	NA	NA	NA_x000D_
RAT05706	8.64607	P	7.64545	P	2.00086	2.00086	up	0	RAT05706	0	mRNA	Sccpdh	saccharopine dehydrogenase (putative)	NA	NA	NM_001013985	NA	NA	NA	NA_x000D_
RAT24846	3.72602	A	7.42426	P	0.0770408	12.9801	down	0	RAT24846	0	mRNA	RGD1564567	"similar to CG14998-PC, isoform C"	NA	NA	XM_001064920	NA	NA	NA	NA_x000D_
RAT15734	2.44724	A	6.8478	P	0.047348	21.1202	down	0	RAT15734	0	mRNA	NA	NA	NA	NA	NA	NA	NA	NA	NA_x000D_
RAT24747	7.06525	P	5.74775	P	2.49234	2.49234	up	0	RAT24747	0	mRNA	NA	NA	NA	NA	NA	NA	NA	NA	NA_x000D_
RAT16849	6.88438	P	4.43328	A	5.46834	5.46834	up	0	RAT16849	0	mRNA	ste2	estrogen sulfotransferase	NA	NA	NM_001007718	NA	NA	NA	NA_x000D_
RAT18049	5.21492	P	3.92193	A	2.45035	2.45035	up	0	RAT18049	0	mRNA	Nudt6	nudix (nucleoside diphosphate linked moiety X)-type motif 6	NA	NA	NM_181363	NA	NA	NA	NA_x000D_
RAT03669	9.58439	P	8.36236	P	2.33276	2.33276	up	0	RAT03669	0	mRNA	RGD1562629	similar to neurobeachin	NA	NA	XR_085753	NA	NA	NA	NA_x000D_
RAT18228	5.67408	P	8.33438	P	0.158186	6.32165	down	0	RAT18228	0	mRNA	LOC500948	LRRGT00073	NA	NA	NM_001047964	NA	NA	NA	NA_x000D_
RAT00519	9.84198	P	10.9434	P	0.466051	2.14569	down	0	RAT00519	0	mRNA	Wif1	Wnt inhibitory factor 1	NA	NA	NM_053738	NA	NA	NA	NA_x000D_
RAT24706	2.45206	A	5.52015	P	0.119237	8.38663	down	0	RAT24706	0	mRNA	NA	NA	NA	NA	NA	NA	NA	NA	NA_x000D_
RAT06801	5.15629	P	3.60404	A	2.93276	2.93276	up	0	RAT06801	0	mRNA	NA	NA	NA	NA	NA	NA	NA	NA	NA_x000D_
RAT27298	4.26884	A	6.5542	P	0.205134	4.87487	down	0	RAT27298	0	mRNA	NA	NA	NA	NA	ENSRNOT00000041051	NA	NA	NA	NA_x000D_
RAT24228	8.11505	P	9.51098	P	0.38	2.63158	down	0	RAT24228	0	mRNA	RGD1561517	similar to chromosome 20 open reading frame 144	NA	NA	NM_001135901	NA	NA	NA	NA_x000D_
RAT12851	9.11153	P	10.3353	P	0.428148	2.33564	down	0	RAT12851	0	mRNA	NA	NA	NA	NA	ENSRNOT00000049147	NA	NA	NA	NA_x000D_
RAT25273	4.18714	A	5.61936	P	0.370561	2.69861	down	0	RAT25273	0	mRNA	Fsip2-ps1	"fibrous sheath-interacting protein 2, pseudogene 1"	NA	NA	XR_085789	NA	NA	NA	NA_x000D_
RAT05311	9.826	P	11.1675	P	0.39462	2.53408	down	0	RAT05311	0	mRNA	RGD1561507	similar to hypothetical protein FLJ31606	NA	NA	NM_001106195	NA	NA	NA	NA_x000D_
RAT08092	3.91859	A	5.49437	P	0.335463	2.98096	down	0	RAT08092	0	mRNA	Zfp711	zinc finger protein 711	NA	NA	ENSRNOT00000006237	NA	NA	NA	NA_x000D_
RAT02646	8.9871	P	10.0537	P	0.477438	2.09451	down	0	RAT02646	0	mRNA	Icam1	intercellular adhesion molecule 1	NA	NA	NM_012967	NA	NA	NA	NA_x000D_
RAT06617	6.37043	P	8.00973	P	0.321013	3.11514	down	0	RAT06617	0	mRNA	NA	NA	NA	NA	ENSRNOT00000055066	NA	NA	NA	NA_x000D_
RAT13731	4.1168	A	5.41547	P	0.406499	2.46003	down	0	RAT13731	0	mRNA	Galntl6	UDP-N-acetyl-alpha-D-galactosamine:polypeptide N-acetylgalactosaminyltransferase-like 6	NA	NA	NM_001135756	NA	NA	NA	NA_x000D_
RAT03822	10.3579	P	11.6656	P	0.403972	2.47542	down	0	RAT03822	0	mRNA	RGD1311870	similar to RIKEN cDNA 4930549C01	NA	NA	ENSRNOT00000029077	NA	NA	NA	NA_x000D_
RAT07167	5.00917	A	6.13177	P	0.459264	2.1774	down	0	RAT07167	0	mRNA	Capza3	"capping protein (actin filament) muscle Z-line, alpha 3"	NA	NA	NM_017164	NA	NA	NA	NA_x000D_
RAT02673	6.93057	P	5.64636	P	2.43549	2.43549	up	0	RAT02673	0	mRNA	Frk	fyn-related kinase	NA	NA	NM_024368	NA	NA	NA	NA_x000D_
RAT11613	11.6033	P	9.97621	P	3.08879	3.08879	up	0	RAT11613	0	mRNA	Slc35f2	"solute carrier family 35, member F2"	NA	NA	NM_001106822	NA	NA	NA	NA_x000D_
RAT29729	9.84963	P	8.71023	P	2.20289	2.20289	up	0	RAT29729	0	mRNA	RGD1303271	similar to chromosome 1 open reading frame 172	NA	NA	NM_001004268	NA	NA	NA	NA_x000D_
RAT10821	8.32915	P	9.52416	P	0.436783	2.28947	down	0	RAT10821	0	mRNA	Ccdc7	coiled-coil domain containing 7	NA	NA	NM_001011561	NA	NA	NA	NA_x000D_
RAT01419	5.74636	P	6.84619	P	0.466571	2.14329	down	0	RAT01419	0	mRNA	Parp3	"poly (ADP-ribose) polymerase family, member 3"	NA	NA	NM_001008328	NA	NA	NA	NA_x000D_
RAT29420	7.16239	P	5.79094	P	2.5873	2.5873	up	0	RAT29420	0	mRNA	NA	NA	NA	NA	NA	NA	NA	NA	NA_x000D_
RAT12464	6.11266	P	2.50445	A	12.1949	12.1949	up	0	RAT12464	0	mRNA	NA	NA	NA	NA	NA	NA	NA	NA	NA_x000D_
RAT07973	7.28815	P	9.4335	P	0.226041	4.42398	down	0	RAT07973	0	mRNA	LOC682105	similar to receptor expression enhancing protein 2	NA	NA	NM_001048047	NA	NA	NA	NA_x000D_
RAT26695	5.65396	P	4.59667	A	2.08102	2.08102	up	0	RAT26695	0	mRNA	Hpn	hepsin	NA	NA	NM_017112	NA	NA	NA	NA_x000D_
RAT18615	5.32858	P	7.0078	P	0.31225	3.20256	down	0	RAT18615	0	mRNA	NA	NA	NA	NA	NA	NA	NA	NA	NA_x000D_
RAT00722	9.07308	P	7.79039	P	2.43293	2.43293	up	0	RAT00722	0	mRNA	Lrrfip1	leucine rich repeat (in FLII) interacting protein 1	NA	NA	NM_001014269	NA	NA	NA	NA_x000D_
RAT07635	7.09578	P	8.59351	P	0.354109	2.82399	down	0	RAT07635	0	mRNA	NA	NA	NA	NA	ENSRNOT00000008361	NA	NA	NA	NA_x000D_
RAT29743	4.3029	A	5.81082	P	0.351618	2.84399	down	0	RAT29743	0	mRNA	Shcbp1l	SHC SH2-domain binding protein 1-like	NA	NA	NM_001105961	NA	NA	NA	NA_x000D_
RAT26488	3.92134	A	5.73479	P	0.284509	3.51483	down	0	RAT26488	0	mRNA	Lhx8	LIM homeobox 8	NA	NA	NM_001012219	NA	NA	NA	NA_x000D_
RAT26704	7.87924	P	5.10352	A	6.8482	6.8482	up	0	RAT26704	0	mRNA	Zik1	zinc finger protein interacting with K protein 1 homolog (mouse)	NA	NA	ENSRNOT00000014911	NA	NA	NA	NA_x000D_
RAT15420	6.6162	P	5.47946	P	2.19884	2.19884	up	0	RAT15420	0	mRNA	Myh3	"myosin, heavy chain 3, skeletal muscle, embryonic"	NA	NA	NM_012604	NA	NA	NA	NA_x000D_
RAT14463	7.78832	P	9.47667	P	0.310281	3.22289	down	0	RAT14463	0	mRNA	Dusp26	dual specificity phosphatase 26 (putative)	NA	NA	NM_001012352	NA	NA	NA	NA_x000D_
RAT01725	12.7372	P	11.18	P	2.94293	2.94293	up	0	RAT01725	0	mRNA	Scd	stearoyl-CoA desaturase (delta-9-desaturase)	NA	NA	NM_031841	NA	NA	NA	NA_x000D_
RAT21571	6.82133	P	8.46524	P	0.319989	3.12511	down	0	RAT21571	0	mRNA	Syndig1l	synapse differentiation inducing 1-like	NA	NA	NM_001109485	NA	NA	NA	NA_x000D_
RAT23170	3.98698	A	5.59426	P	0.328216	3.04677	down	0	RAT23170	0	mRNA	Olr1481	olfactory receptor 1481	NA	NA	NM_001000527	NA	NA	NA	NA_x000D_
RAT11328	5.25599	P	3.31133	A	3.84946	3.84946	up	0	RAT11328	0	mRNA	Nat13	N-acetyltransferase 13	NA	NA	NM_001105881	NA	NA	NA	NA_x000D_
RAT19393	6.6519	P	5.2431	P	2.65515	2.65515	up	0	RAT19393	0	mRNA	Kcnh2	"potassium voltage-gated channel, subfamily H (eag-related), member 2"	NA	NA	NM_053949	NA	NA	NA	NA_x000D_
RAT28928	8.38405	P	9.42896	P	0.484677	2.06323	down	0	RAT28928	0	mRNA	Gabarapl1	GABA(A) receptor-associated protein like 1	NA	NA	NM_001044294	NA	NA	NA	NA_x000D_
RAT25905	3.77575	A	5.59283	P	0.283795	3.52367	down	0	RAT25905	0	mRNA	NA	NA	NA	NA	ENSRNOT00000060746	NA	NA	NA	NA_x000D_
RAT02937	9.74868	P	8.51216	P	2.3563	2.3563	up	0	RAT02937	0	mRNA	Lpcat3	lysophosphatidylcholine acyltransferase 3	NA	NA	NM_001012189	NA	NA	NA	NA_x000D_
RAT20279	8.1487	P	9.36144	P	0.431448	2.31778	down	0	RAT20279	0	mRNA	LOC685203	hypothetical protein LOC685203	NA	NA	ENSRNOT00000059159	NA	NA	NA	NA_x000D_
RAT12587	7.00744	P	4.10172	A	7.49393	7.49393	up	0	RAT12587	0	mRNA	NA	NA	NA	NA	NA	NA	NA	NA	NA_x000D_
RAT23149	7.50889	P	5.89866	P	3.053	3.053	up	0	RAT23149	0	mRNA	Ncaph	"non-SMC condensin I complex, subunit H"	NA	NA	XR_085785	NA	NA	NA	NA_x000D_
RAT24193	7.04455	P	8.53877	P	0.354972	2.81712	down	0	RAT24193	0	mRNA	RGD1565071	similar to hypothetical protein 4930509O22	NA	NA	ENSRNOT00000040180	NA	NA	NA	NA_x000D_
RAT26021	2.44343	A	6.51686	P	0.0593985	16.8354	down	0	RAT26021	0	mRNA	NA	NA	NA	NA	ENSRNOT00000035050	NA	NA	NA	NA_x000D_
RAT27253	4.48386	A	6.25661	P	0.292652	3.41703	down	0	RAT27253	0	mRNA	Cldn15	claudin 15	NA	NA	NM_001107135	NA	NA	NA	NA_x000D_
RAT22026	9.64841	P	10.7017	P	0.481877	2.07522	down	0	RAT22026	0	mRNA	NA	NA	NA	NA	NA	NA	NA	NA	NA_x000D_
RAT16575	6.79788	P	5.01748	A	3.43522	3.43522	up	0	RAT16575	0	mRNA	NA	NA	NA	NA	NA	NA	NA	NA	NA_x000D_
RAT27970	7.83732	P	6.42386	P	2.66375	2.66375	up	0	RAT27970	0	mRNA	NA	NA	NA	NA	NA	NA	NA	NA	NA_x000D_
RAT28310	2.48972	A	7.04752	P	0.0424587	23.5523	down	0	RAT28310	0	mRNA	Ptger3	prostaglandin E receptor 3 (subtype EP3)	NA	NA	NM_012704	NA	NA	NA	NA_x000D_
RAT06353	5.62419	P	6.74561	P	0.459641	2.17561	down	0	RAT06353	0	mRNA	NA	NA	NA	NA	XM_344295	NA	NA	NA	NA_x000D_
RAT16938	6.03276	P	2.43269	A	12.1263	12.1263	up	0	RAT16938	0	mRNA	Zfp385c	zinc finger protein 385C	NA	NA	ENSRNOT00000067868	NA	NA	NA	NA_x000D_
RAT18681	11.3627	P	12.8355	P	0.360286	2.77558	down	0	RAT18681	0	mRNA	LOC365778	similar to RIKEN cDNA 1700034I23	NA	NA	NM_001014251	NA	NA	NA	NA_x000D_
RAT27353	6.463	P	8.94932	P	0.178461	5.60348	down	0	RAT27353	0	mRNA	Ostalpha	organic solute transporter alpha	NA	NA	NM_001107087	NA	NA	NA	NA_x000D_
RAT27388	5.27989	P	4.22053	A	2.08401	2.08401	up	0	RAT27388	0	mRNA	Clec7a	"C-type lectin domain family 7, member A"	NA	NA	NM_001173386	NA	NA	NA	NA_x000D_
RAT26740	9.65026	P	10.7996	P	0.450844	2.21806	down	0	RAT26740	0	mRNA	RGD1309362	similar to interferon-inducible GTPase	NA	NA	NM_001024884	NA	NA	NA	NA_x000D_
RAT21307	7.50828	P	8.90297	P	0.380326	2.62932	down	0	RAT21307	0	mRNA	NA	NA	NA	NA	FQ224293	NA	NA	NA	NA_x000D_
RAT21889	7.79794	P	9.01535	P	0.430053	2.32529	down	0	RAT21889	0	mRNA	Abcc1	"ATP-binding cassette, subfamily C (CFTR/MRP), member 1"	NA	NA	NM_022281	NA	NA	NA	NA_x000D_
RAT19705	6.31814	P	3.64554	A	6.37578	6.37578	up	0	RAT19705	0	mRNA	Pm20d2	peptidase M20 domain containing 2	NA	NA	NM_001107922	NA	NA	NA	NA_x000D_
RAT17916	6.093	P	2.59456	A	11.3014	11.3014	up	0	RAT17916	0	mRNA	Cd163	CD163 molecule	NA	NA	NM_001107887	NA	NA	NA	NA_x000D_
RAT07229	8.73398	P	7.3589	P	2.59383	2.59383	up	0	RAT07229	0	mRNA	LOC689959	hypothetical protein LOC689959	NA	NA	NM_001109559	NA	NA	NA	NA_x000D_
RAT10966	6.5574	P	7.86001	P	0.405392	2.46675	down	0	RAT10966	0	mRNA	NA	NA	NA	NA	ENSRNOT00000027244	NA	NA	NA	NA_x000D_
RAT05119	9.47128	P	11.7255	P	0.209615	4.77064	down	0	RAT05119	0	mRNA	Gas6	growth arrest specific 6	NA	NA	NM_057100	NA	NA	NA	NA_x000D_
RAT11322	5.59631	P	4.56992	A	2.03692	2.03692	up	0	RAT11322	0	mRNA	Zc3h6	zinc finger CCCH type containing 6	NA	NA	NM_001107772	NA	NA	NA	NA_x000D_
RAT11089	5.86644	P	3.71708	A	4.43631	4.43631	up	0	RAT11089	0	mRNA	Osbpl11	oxysterol binding protein-like 11	NA	NA	NM_001107090	NA	NA	NA	NA_x000D_
RAT20934	5.18316	P	6.45055	P	0.415411	2.40725	down	0	RAT20934	0	mRNA	RGD1305207	similar to RIKEN cDNA 1700011A15	NA	NA	NM_001014267	NA	NA	NA	NA_x000D_
RAT24282	8.64017	P	6.98817	P	3.1427	3.1427	up	0	RAT24282	0	mRNA	LOC366979	hypothetical LOC366979	NA	NA	XR_005569	NA	NA	NA	NA_x000D_
RAT20127	8.7532	P	10.1085	P	0.390843	2.55857	down	0	RAT20127	0	mRNA	Poc1a	POC1 centriolar protein homolog A (Chlamydomonas)	NA	NA	NM_001109296	NA	NA	NA	NA_x000D_
RAT04187	8.42081	P	10.8352	P	0.187583	5.33098	down	0	RAT04187	0	mRNA	Ltbp4	latent transforming growth factor beta binding protein 4	NA	NA	NM_001170336	NA	NA	NA	NA_x000D_
RAT12634	4.09135	A	5.6461	P	0.340388	2.93782	down	0	RAT12634	0	mRNA	Bpifa5	"BPI fold containing family A, member 5"	NA	NA	NM_001107792	NA	NA	NA	NA_x000D_
RAT18329	2.45487	A	5.97107	P	0.0874012	11.4415	down	0	RAT18329	0	mRNA	Prop1	PROP paired-like homeobox 1	NA	NA	NM_153627	NA	NA	NA	NA_x000D_
RAT05240	12.4254	P	11.2259	P	2.29664	2.29664	up	0	RAT05240	0	mRNA	Ormdl2	ORM1-like 2 (S. cerevisiae)	NA	NA	NM_001105940	NA	NA	NA	NA_x000D_
RAT09493	2.51095	A	6.70273	P	0.0547202	18.2748	down	0	RAT09493	0	mRNA	Itga7	"integrin, alpha 7"	NA	NA	NM_030842	NA	NA	NA	NA_x000D_
RAT13107	4.63346	A	6.07939	P	0.367055	2.72439	down	0	RAT13107	0	mRNA	NA	NA	NA	NA	NA	NA	NA	NA	NA_x000D_
RAT24742	4.23283	A	6.15643	P	0.263597	3.79368	down	0	RAT24742	0	mRNA	Ttc34	tetratricopeptide repeat domain 34	NA	NA	ENSRNOT00000037211	NA	NA	NA	NA_x000D_
RAT25472	14.1285	P	12.7589	M	2.58399	2.58399	up	0	RAT25472	0	mRNA	NA	NA	NA	NA	NA	NA	NA	NA	NA_x000D_
RAT17579	8.00811	P	9.4845	P	0.359388	2.78251	down	0	RAT17579	0	mRNA	Sned1	"sushi, nidogen and EGF-like domains 1"	NA	NA	AF439716	NA	NA	NA	NA_x000D_
RAT17760	5.40688	P	3.51938	A	3.69993	3.69993	up	0	RAT17760	0	mRNA	NA	NA	NA	NA	NA	NA	NA	NA	NA_x000D_
RAT03282	6.75105	P	5.40688	P	2.53884	2.53884	up	0	RAT03282	0	mRNA	Iyd	iodotyrosine deiodinase	NA	NA	NM_001025000	NA	NA	NA	NA_x000D_
RAT28927	7.86052	P	6.84324	P	2.02409	2.02409	up	0	RAT28927	0	mRNA	Hmgn3	high mobility group nucleosomal binding domain 3	NA	NA	NM_001007020	NA	NA	NA	NA_x000D_
RAT13120	5.55771	P	4.06667	A	2.81091	2.81091	up	0	RAT13120	0	mRNA	NA	NA	NA	NA	TC597048	NA	NA	NA	NA_x000D_
RAT21870	7.55453	P	8.76258	P	0.432853	2.31025	down	0	RAT21870	0	mRNA	Stk33	serine/threonine kinase 33	NA	NA	ENSRNOT00000019597	NA	NA	NA	NA_x000D_
RAT30387	2.5065	A	5.90991	P	0.0945089	10.581	down	0	RAT30387	0	mRNA	NA	NA	NA	NA	DQ883656	NA	NA	NA	NA_x000D_
RAT07698	7.42156	P	5.80204	P	3.07273	3.07273	up	0	RAT07698	0	mRNA	Bmpr2	"bone morphogenetic protein receptor, type II (serine/threonine kinase)"	NA	NA	NM_080407	NA	NA	NA	NA_x000D_
RAT11114	8.28032	P	7.14096	P	2.20283	2.20283	up	0	RAT11114	0	mRNA	RGD1359158	similar to RIKEN cDNA 1110059E24	NA	NA	NM_001007737	NA	NA	NA	NA_x000D_
RAT26843	4.11215	A	5.89845	P	0.289913	3.44931	down	0	RAT26843	0	mRNA	LOC689091	similar to RIKEN cDNA 5031410I06	NA	NA	EX491611	NA	NA	NA	NA_x000D_
RAT00824	7.95586	P	10.3863	P	0.185503	5.39076	down	0	RAT00824	0	mRNA	Sema3c	"sema domain, immunoglobulin domain (Ig), short basic domain, secreted, (semaphorin) 3C"	NA	NA	NM_001106578	NA	NA	NA	NA_x000D_
RAT10975	6.91294	P	8.95241	P	0.243253	4.11095	down	0	RAT10975	0	mRNA	Apol3	"apolipoprotein L, 3"	NA	NA	NM_001013175	NA	NA	NA	NA_x000D_
RAT03882	8.9299	P	10.1345	P	0.433876	2.30481	down	0	RAT03882	0	mRNA	Map3k6	mitogen-activated protein kinase kinase kinase 6	NA	NA	NM_001107909	NA	NA	NA	NA_x000D_
RAT14180	5.61163	P	6.66749	P	0.481009	2.07896	down	0	RAT14180	0	mRNA	Nkx6-1	NK6 homeobox 1	NA	NA	NM_031737	NA	NA	NA	NA_x000D_
RAT08360	6.92586	P	2.43266	A	22.521	22.521	up	0	RAT08360	0	mRNA	RGD1563982	similar to F-box only protein 27	NA	NA	NM_001110491	NA	NA	NA	NA_x000D_
RAT09581	4.79738	A	7.50756	P	0.15281	6.54407	down	0	RAT09581	0	mRNA	Ptplad2	protein tyrosine phosphatase-like A domain containing 2	NA	NA	NM_001108669	NA	NA	NA	NA_x000D_
RAT27769	5.73829	P	4.73746	A	2.00115	2.00115	up	0	RAT27769	0	mRNA	Snx19	sorting nexin 19	NA	NA	NM_001108131	NA	NA	NA	NA_x000D_
RAT28672	6.36428	P	7.38562	P	0.492658	2.0298	down	0	RAT28672	0	mRNA	Tp53bp2	"tumor protein p53 binding protein, 2"	NA	NA	ENSRNOT00000004330	NA	NA	NA	NA_x000D_
RAT14333	4.77993	A	7.66521	P	0.135346	7.38847	down	0	RAT14333	0	mRNA	NA	NA	NA	NA	XM_343725	NA	NA	NA	NA_x000D_
RAT18993	6.02145	P	7.6492	P	0.323594	3.0903	down	0	RAT18993	0	mRNA	NA	NA	NA	NA	CB313763	NA	NA	NA	NA_x000D_
RAT13300	7.48893	P	6.31183	P	2.2612	2.2612	up	0	RAT13300	0	mRNA	Utp14a	"UTP14, U3 small nucleolar ribonucleoprotein, homolog A (yeast)"	NA	NA	NM_001014113	NA	NA	NA	NA_x000D_
RAT25804	5.14409	P	3.23651	A	3.75179	3.75179	up	0	RAT25804	0	mRNA	Rbm20	RNA binding motif protein 20	NA	NA	NM_001107611	NA	NA	NA	NA_x000D_
RAT00264	8.81473	P	6.78257	P	4.09017	4.09017	up	0	RAT00264	0	mRNA	Rgn	regucalcin (senescence marker protein-30)	NA	NA	NM_031546	NA	NA	NA	NA_x000D_
RAT07394	3.49151	A	5.88825	P	0.189893	5.26613	down	0	RAT07394	0	mRNA	Aass	aminoadipate-semialdehyde synthase	NA	NA	NM_001100963	NA	NA	NA	NA_x000D_
RAT04133	4.29782	A	5.46467	P	0.44539	2.24522	down	0	RAT04133	0	mRNA	Rimbp3	RIMS binding protein 3	NA	NA	ENSRNOT00000051991	NA	NA	NA	NA_x000D_
RAT12079	12.0521	P	11.026	P	2.0365	2.0365	up	0	RAT12079	0	mRNA	Bin2a	beta-galactosidase-like protein	NA	NA	NM_001009524	NA	NA	NA	NA_x000D_
RAT00431	6.64237	P	5.00661	A	3.1075	3.1075	up	0	RAT00431	0	mRNA	Slc25a16	"solute carrier family 25 (mitochondrial carrier, Graves disease autoantigen), member 16"	NA	NA	NM_001100860	NA	NA	NA	NA_x000D_
RAT22981	5.65161	P	7.34254	P	0.309727	3.22865	down	0	RAT22981	0	mRNA	NA	NA	NA	NA	ENSRNOT00000054906	NA	NA	NA	NA_x000D_
RAT12655	9.84057	P	8.75909	P	2.1162	2.1162	up	0	RAT12655	0	mRNA	Tmem169	transmembrane protein 169	NA	NA	NM_001109574	NA	NA	NA	NA_x000D_
RAT11880	6.38609	P	3.38254	A	8.01967	8.01967	up	0	RAT11880	0	mRNA	Wdr5b	WD repeat domain 5B	NA	NA	NM_001024766	NA	NA	NA	NA_x000D_
RAT04616	6.51995	P	4.23848	A	4.86173	4.86173	up	0	RAT04616	0	mRNA	Samhd1	"SAM domain and HD domain, 1"	NA	NA	ENSRNOT00000008961	NA	NA	NA	NA_x000D_
RAT15638	6.32279	P	2.56355	A	13.5408	13.5408	up	0	RAT15638	0	mRNA	Mt4	metallothionein 4	NA	NA	NM_001126084	NA	NA	NA	NA_x000D_
RAT11636	9.4679	P	11.8759	P	0.188411	5.30755	down	0	RAT11636	0	mRNA	Nkain4	Na+/K+ transporting ATPase interacting 4	NA	NA	NM_001106550	NA	NA	NA	NA_x000D_
RAT27783	7.93999	P	9.03923	P	0.466762	2.14242	down	0	RAT27783	0	mRNA	NA	NA	NA	NA	ENSRNOT00000067746	NA	NA	NA	NA_x000D_
RAT11293	5.49886	P	4.38862	A	2.15881	2.15881	up	0	RAT11293	0	mRNA	Napg	"N-ethylmaleimide-sensitive factor attachment protein, gamma"	NA	NA	NM_001107384	NA	NA	NA	NA_x000D_
RAT09280	5.30977	P	6.60813	P	0.406588	2.45949	down	0	RAT09280	0	mRNA	NA	NA	NA	NA	TC615084	NA	NA	NA	NA_x000D_
RAT04743	5.99332	P	2.449	A	11.6666	11.6666	up	0	RAT04743	0	mRNA	Pigzl1	"phosphatidylinositol glycan, class Z-like 1"	NA	NA	ENSRNOT00000043300	NA	NA	NA	NA_x000D_
RAT12905	12.8572	P	13.9039	P	0.484051	2.0659	down	0	RAT12905	0	mRNA	Cdx1	caudal type homeo box 1	NA	NA	XM_344691	NA	NA	NA	NA_x000D_
RAT15136	4.11684	A	7.19458	P	0.118443	8.44289	down	0	RAT15136	0	mRNA	RGD1559662	similar to implantation serine proteinase 2	NA	NA	ENSRNOT00000036630	NA	NA	NA	NA_x000D_
RAT17169	6.1484	P	2.4856	A	12.6652	12.6652	up	0	RAT17169	0	mRNA	Hnf4g	"hepatocyte nuclear factor 4, gamma"	NA	NA	NM_001108939	NA	NA	NA	NA_x000D_
RAT26808	3.50296	A	6.10965	P	0.164176	6.09103	down	0	RAT26808	0	mRNA	Best3	bestrophin 3	NA	NA	NM_001191783	NA	NA	NA	NA_x000D_
RAT25749	5.98132	P	2.5597	A	10.7154	10.7154	up	0	RAT25749	0	mRNA	Cntn6	contactin 6	NA	NA	NM_013225	NA	NA	NA	NA_x000D_
RAT16170	5.17992	P	6.38415	P	0.434002	2.30413	down	0	RAT16170	0	mRNA	Lox	lysyl oxidase	NA	NA	NM_017061	NA	NA	NA	NA_x000D_
RAT22185	8.24494	P	7.05773	P	2.27712	2.27712	up	0	RAT22185	0	mRNA	RGD1306233	similar to hypothetical protein MGC29761	NA	NA	NM_001106564	NA	NA	NA	NA_x000D_
RAT11945	3.41216	A	6.67846	P	0.103931	9.62174	down	0	RAT11945	0	mRNA	Grhl3	grainyhead-like 3 (Drosophila)	NA	NA	NM_001106690	NA	NA	NA	NA_x000D_
RAT13322	4.82405	A	6.26363	P	0.368674	2.71242	down	0	RAT13322	0	mRNA	NA	NA	NA	NA	ENSRNOT00000064425	NA	NA	NA	NA_x000D_
RAT08120	5.78896	P	4.74457	A	2.0625	2.0625	up	0	RAT08120	0	mRNA	Olr710	olfactory receptor 710	NA	NA	NM_001000571	NA	NA	NA	NA_x000D_
RAT22097	6.99054	P	5.42376	P	2.96243	2.96243	up	0	RAT22097	0	mRNA	NA	NA	NA	NA	TC589321	NA	NA	NA	NA_x000D_
RAT12601	9.75431	P	8.63169	P	2.17741	2.17741	up	0	RAT12601	0	mRNA	Snrnp27	small nuclear ribonucleoprotein 27 (U4/U6.U5)	NA	NA	NM_001108636	NA	NA	NA	NA_x000D_
RAT22184	8.5088	P	7.492	P	2.02341	2.02341	up	0	RAT22184	0	mRNA	Tmem213	transmembrane protein 213	NA	NA	ENSRNOT00000018331	NA	NA	NA	NA_x000D_
RAT11602	5.72124	P	6.73986	P	0.493589	2.02598	down	0	RAT11602	0	mRNA	LOC367436	similar to Y-linked testis-specific protein	NA	NA	XM_346138	NA	NA	NA	NA_x000D_
RAT21531	12.1178	P	10.2399	P	3.67526	3.67526	up	0	RAT21531	0	mRNA	Scd1	stearoyl-Coenzyme A desaturase 1	NA	NA	NM_139192	NA	NA	NA	NA_x000D_
RAT18090	12.553	P	13.8598	P	0.404218	2.47391	down	0	RAT18090	0	mRNA	Crisp2	cysteine-rich secretory protein 2	NA	NA	NM_001011710	NA	NA	NA	NA_x000D_
RAT06599	8.02764	P	9.70281	P	0.313129	3.19357	down	0	RAT06599	0	mRNA	Mettl6	methyltransferase like 6	NA	NA	NM_001007623	NA	NA	NA	NA_x000D_
RAT18158	6.86542	P	5.1244	A	3.34272	3.34272	up	0	RAT18158	0	mRNA	NA	NA	NA	NA	NA	NA	NA	NA	NA_x000D_
RAT03209	6.526	P	5.37973	P	2.2134	2.2134	up	0	RAT03209	0	mRNA	Zfp868	zinc finger protein 868	NA	NA	NM_001009538	NA	NA	NA	NA_x000D_
RAT29792	5.82505	P	6.91131	P	0.470981	2.12323	down	0	RAT29792	0	mRNA	LOC301816	similar to Spindlin-like protein 2 (SPIN-2)	NA	NA	XM_229292	NA	NA	NA	NA_x000D_
RAT17303	9.74145	P	10.7564	P	0.494847	2.02083	down	0	RAT17303	0	mRNA	NA	NA	NA	NA	NA	NA	NA	NA	NA_x000D_
RAT00850	14.7952	P	13.1612	P	3.10358	3.10358	up	0	RAT00850	0	mRNA	Gsta3	glutathione S-transferase A3	NA	NA	NM_031509	NA	NA	NA	NA_x000D_
RAT27331	16.8791	P	15.7971	P	2.11686	2.11686	up	0	RAT27331	0	mRNA	Defb39	defensin beta 39	NA	NA	NM_001037522	NA	NA	NA	NA_x000D_
RAT00009	8.9408	P	7.57163	P	2.58323	2.58323	up	0	RAT00009	0	mRNA	Dixdc1	DIX domain containing 1	NA	NA	NM_001037654	NA	NA	NA	NA_x000D_
RAT14497	6.18943	P	4.25964	A	3.81001	3.81001	up	0	RAT14497	0	mRNA	Sh2b2	SH2B adaptor protein 2	NA	NA	NM_053669	NA	NA	NA	NA_x000D_
RAT29011	9.80664	P	8.62876	P	2.26244	2.26244	up	0	RAT29011	0	mRNA	Eid3	EP300 interacting inhibitor of differentiation 3	NA	NA	NM_001044304	NA	NA	NA	NA_x000D_
RAT03725	5.8821	P	7.23904	P	0.390409	2.56142	down	0	RAT03725	0	mRNA	Pon3	paraoxonase 3	NA	NA	NM_001004086	NA	NA	NA	NA_x000D_
RAT01484	10.0124	P	11.1143	P	0.465915	2.14631	down	0	RAT01484	0	mRNA	Pla2g2c	"phospholipase A2, group IIC"	NA	NA	U07798	NA	NA	NA	NA_x000D_
RAT03148	4.28348	A	5.7228	P	0.368742	2.71192	down	0	RAT03148	0	mRNA	LOC679811	similar to RIKEN cDNA D930015E06	NA	NA	ENSRNOT00000013290	NA	NA	NA	NA_x000D_
RAT07513	7.1677	P	8.32976	P	0.446874	2.23777	down	0	RAT07513	0	mRNA	LOC501080	similar to Discs large homolog 5 (Placenta and prostate DLG) (Discs large protein P-dlg)	NA	NA	XM_576492	NA	NA	NA	NA_x000D_
RAT06516	7.19077	P	8.91538	P	0.30258	3.30491	down	0	RAT06516	0	mRNA	Ehbp1	EH domain binding protein 1	NA	NA	ENSRNOT00000012131	NA	NA	NA	NA_x000D_
RAT19856	6.26876	P	5.10104	A	2.24657	2.24657	up	0	RAT19856	0	mRNA	LOC100125368	zinc finger protein LOC100125368	NA	NA	NM_001139487	NA	NA	NA	NA_x000D_
RAT04409	6.64877	P	5.54095	P	2.15519	2.15519	up	0	RAT04409	0	mRNA	NA	NA	NA	NA	ENSRNOT00000057016	NA	NA	NA	NA_x000D_
RAT28715	7.44661	P	6.41257	P	2.04776	2.04776	up	0	RAT28715	0	mRNA	NA	NA	NA	NA	NA	NA	NA	NA	NA_x000D_
RAT29061	7.2205	P	4.90509	A	4.97746	4.97746	up	0	RAT29061	0	mRNA	Zfp352	zinc finger protein 352	NA	NA	NM_001109357	NA	NA	NA	NA_x000D_
RAT03717	6.97954	P	8.05796	P	0.473549	2.11171	down	0	RAT03717	0	mRNA	Morn5	MORN repeat containing 5	NA	NA	NM_001047912	NA	NA	NA	NA_x000D_
RAT30374	6.54086	P	7.72926	P	0.438788	2.27901	down	0	RAT30374	0	mRNA	NA	NA	NA	NA	DQ875385	NA	NA	NA	NA_x000D_
RAT25975	7.64888	P	6.41119	P	2.35821	2.35821	up	0	RAT25975	0	mRNA	Magohb	mago-nashi homolog B (Drosophila)	NA	NA	NM_001191105	NA	NA	NA	NA_x000D_
RAT10926	6.69856	P	8.63634	P	0.261019	3.83114	down	0	RAT10926	0	mRNA	NA	NA	NA	NA	ENSRNOT00000029784	NA	NA	NA	NA_x000D_
RAT16225	4.00868	A	6.75488	P	0.149043	6.70946	down	0	RAT16225	0	mRNA	NA	NA	NA	NA	NA	NA	NA	NA	NA_x000D_
RAT08634	6.03481	P	7.34475	P	0.403337	2.47932	down	0	RAT08634	0	mRNA	NA	NA	NA	NA	XM_341649	NA	NA	NA	NA_x000D_
RAT18520	9.65428	P	11.4669	P	0.284674	3.51279	down	0	RAT18520	0	mRNA	NA	NA	NA	NA	NA	NA	NA	NA	NA_x000D_
RAT07333	7.46033	P	8.54449	P	0.471666	2.12014	down	0	RAT07333	0	mRNA	Ribc2	RIB43A domain with coiled-coils 2	NA	NA	NM_001013949	NA	NA	NA	NA_x000D_
RAT13076	10.1508	P	12.0475	P	0.26857	3.72343	down	0	RAT13076	0	mRNA	NA	NA	NA	NA	NA	NA	NA	NA	NA_x000D_
RAT00939	6.91687	P	8.36138	P	0.367418	2.7217	down	0	RAT00939	0	mRNA	Tmem176a	transmembrane protein 176A	NA	NA	NM_001039008	NA	NA	NA	NA_x000D_
RAT10376	6.05021	P	4.29059	A	3.38609	3.38609	up	0	RAT10376	0	mRNA	NA	NA	NA	NA	TC591870	NA	NA	NA	NA_x000D_
RAT27450	7.57295	P	3.63008	A	15.3789	15.3789	up	0	RAT27450	0	mRNA	NA	NA	NA	NA	ENSRNOT00000006897	NA	NA	NA	NA_x000D_
RAT14233	7.27118	P	3.82154	A	10.9256	10.9256	up	0	RAT14233	0	mRNA	Slc45a3	"solute carrier family 45, member 3"	NA	NA	NM_001135868	NA	NA	NA	NA_x000D_
RAT19791	5.37797	P	7.00871	P	0.322923	3.09672	down	0	RAT19791	0	mRNA	LOC363337	similar to RIKEN cDNA 1700081O22	NA	NA	NM_001014221	NA	NA	NA	NA_x000D_
RAT03087	5.78843	P	4.76911	A	2.02696	2.02696	up	0	RAT03087	0	mRNA	Med4	mediator complex subunit 4	NA	NA	NM_001024256	NA	NA	NA	NA_x000D_
RAT26364	9.21383	P	11.2611	P	0.24195	4.13309	down	0	RAT26364	0	mRNA	Sema3f	"sema domain, immunoglobulin domain (Ig), short basic domain, secreted, (semaphorin) 3 F"	NA	NA	NM_001108185	NA	NA	NA	NA_x000D_
RAT16060	6.07805	P	3.37124	A	6.5288	6.5288	up	0	RAT16060	0	mRNA	Chgb	chromogranin B	NA	NA	NM_012526	NA	NA	NA	NA_x000D_
RAT19042	15.5382	P	16.8386	P	0.405999	2.46306	down	0	RAT19042	0	mRNA	Oaz3	ornithine decarboxylase antizyme 3	NA	NA	NM_001101018	NA	NA	NA	NA_x000D_
RAT08168	5.13609	P	3.35138	A	3.44549	3.44549	up	0	RAT08168	0	mRNA	Galnt7	UDP-N-acetyl-alpha-D-galactosamine:polypeptide N-acetylgalactosaminyltransferase 7 (GalNAc-T7)	NA	NA	NM_022926	NA	NA	NA	NA_x000D_
RAT18713	2.47706	A	5.47146	P	0.125486	7.96903	down	0	RAT18713	0	mRNA	Hmgb1-ps2	"high mobility group box 1, pseudogene 2"	NA	NA	NR_024023	NA	NA	NA	NA_x000D_
RAT06251	7.74902	P	9.68322	P	0.261666	3.82167	down	0	RAT06251	0	mRNA	Cpeb3	cytoplasmic polyadenylation element binding protein 3	NA	NA	ENSRNOT00000047387	NA	NA	NA	NA_x000D_
RAT11405	9.85659	P	8.29642	P	2.9489	2.9489	up	0	RAT11405	0	mRNA	Mpzl2	myelin protein zero-like 2	NA	NA	NM_001106818	NA	NA	NA	NA_x000D_
RAT00786	7.61985	P	6.11033	P	2.84716	2.84716	up	0	RAT00786	0	mRNA	Zfp142	zinc finger protein 142	NA	NA	NM_001108225	NA	NA	NA	NA_x000D_
RAT12789	7.90349	P	6.36885	P	2.89714	2.89714	up	0	RAT12789	0	mRNA	Hmgn5	high mobility group nucleosome binding domain 5	NA	NA	NM_001134706	NA	NA	NA	NA_x000D_
RAT17442	6.51596	P	4.62943	A	3.69746	3.69746	up	0	RAT17442	0	mRNA	Usp51	ubiquitin specific peptidase 51	NA	NA	NM_001108252	NA	NA	NA	NA_x000D_
RAT19146	7.08202	P	8.75582	P	0.313426	3.19055	down	0	RAT19146	0	mRNA	Selm	selenoprotein M	NA	NA	NM_001115013	NA	NA	NA	NA_x000D_
RAT22868	7.53789	P	6.32684	P	2.31506	2.31506	up	0	RAT22868	0	mRNA	Zpbp2	zona pellucida binding protein 2	NA	NA	NM_001007011	NA	NA	NA	NA_x000D_
RAT01988	11.255	P	10.1965	P	2.0827	2.0827	up	0	RAT01988	0	mRNA	Lyplal1	lysophospholipase-like 1	NA	NA	NM_001105986	NA	NA	NA	NA_x000D_
RAT27774	7.97197	P	9.70437	P	0.300951	3.3228	down	0	RAT27774	0	mRNA	LOC691125	similar to Probable phospholipid-transporting ATPase ID (ATPase class I type 8B member 2)	NA	NA	XM_001076905	NA	NA	NA	NA_x000D_
RAT29662	8.55866	P	10.6121	P	0.240902	4.15107	down	0	RAT29662	0	mRNA	LOC301193	similar to Discs large homolog 5 (Placenta and prostate DLG) (Discs large protein P-dlg)	NA	NA	XM_002727321	NA	NA	NA	NA_x000D_
RAT28126	8.39598	P	9.65928	P	0.41659	2.40044	down	0	RAT28126	0	mRNA	Wdr62	WD repeat domain 62	NA	NA	NM_001191623	NA	NA	NA	NA_x000D_
RAT22866	2.46144	A	5.51044	P	0.120825	8.2764	down	0	RAT22866	0	mRNA	NA	NA	NA	NA	ENSRNOT00000040298	NA	NA	NA	NA_x000D_
RAT18354	10.5963	P	9.59347	P	2.00397	2.00397	up	0	RAT18354	0	mRNA	Gclc	"glutamate-cysteine ligase, catalytic subunit"	NA	NA	NM_012815	NA	NA	NA	NA_x000D_
RAT14085	9.1445	P	10.3263	P	0.440813	2.26854	down	0	RAT14085	0	mRNA	RGD1305415	similar to CG11259-PA	NA	NA	ENSRNOT00000036357	NA	NA	NA	NA_x000D_
RAT29935	3.52866	A	5.27749	P	0.297542	3.36087	down	0	RAT29935	0	mRNA	Col6a6	"collagen, type VI, alpha 6"	NA	NA	ENSRNOT00000056414	NA	NA	NA	NA_x000D_
RAT14371	5.57242	P	4.08908	A	2.79594	2.79594	up	0	RAT14371	0	mRNA	Wdr73	WD repeat domain 73	NA	NA	NM_001107525	NA	NA	NA	NA_x000D_
RAT19601	12.3969	P	10.8683	P	2.88504	2.88504	up	0	RAT19601	0	mRNA	Hexb	hexosaminidase B	NA	NA	NM_001011946	NA	NA	NA	NA_x000D_
RAT06792	7.61443	P	9.13353	P	0.348902	2.86613	down	0	RAT06792	0	mRNA	Tcp10b	t-complex protein 10b	NA	NA	NM_001107461	NA	NA	NA	NA_x000D_
RAT13109	6.67802	P	7.70218	P	0.491698	2.03377	down	0	RAT13109	0	mRNA	LOC363337	similar to RIKEN cDNA 1700081O22	NA	NA	NM_001014221	NA	NA	NA	NA_x000D_
RAT04220	4.87219	A	6.3703	P	0.354017	2.82472	down	0	RAT04220	0	mRNA	RGD1562699	RGD1562699	NA	NA	NM_001106141	NA	NA	NA	NA_x000D_
RAT20799	3.3619	A	5.28905	P	0.262948	3.80303	down	0	RAT20799	0	mRNA	NA	NA	NA	NA	NA	NA	NA	NA	NA_x000D_
RAT18995	5.2718	P	3.48222	A	3.45714	3.45714	up	0	RAT18995	0	mRNA	NA	NA	NA	NA	NA	NA	NA	NA	NA_x000D_
RAT19644	2.51619	A	5.49272	P	0.12705	7.8709	down	0	RAT19644	0	mRNA	LOC685563	similar to Discs large homolog 5 (Placenta and prostate DLG) (Discs large protein P-dlg)	NA	NA	XM_001064312	NA	NA	NA	NA_x000D_
RAT07994	7.73382	P	8.89606	P	0.446819	2.23804	down	0	RAT07994	0	mRNA	Plekho1	"pleckstrin homology domain containing, family O member 1"	NA	NA	NM_001025119	NA	NA	NA	NA_x000D_
RAT10289	4.85173	A	6.43481	P	0.333769	2.99609	down	0	RAT10289	0	mRNA	Cdh13	cadherin 13	NA	NA	NM_138889	NA	NA	NA	NA_x000D_
RAT10008	5.76705	P	4.34288	A	2.6836	2.6836	up	0	RAT10008	0	mRNA	RGD1564664	similar to LOC387763 protein	NA	NA	NM_001110055	NA	NA	NA	NA_x000D_
RAT23292	4.41568	A	7.30832	P	0.134656	7.42632	down	0	RAT23292	0	mRNA	Fam211a	"family with sequence similarity 211, member A"	NA	NA	ENSRNOT00000030379	NA	NA	NA	NA_x000D_
RAT10690	7.54116	P	6.46444	P	2.10923	2.10923	up	0	RAT10690	0	mRNA	LOC687105	hypothetical protein LOC687105	NA	NA	NM_001127591	NA	NA	NA	NA_x000D_
RAT07997	5.38569	P	4.16832	A	2.32522	2.32522	up	0	RAT07997	0	mRNA	3-Mar	membrane-associated ring finger (C3HC4) 3	NA	NA	NM_001007759	NA	NA	NA	NA_x000D_
RAT18809	9.82488	P	8.43338	P	2.6235	2.6235	up	0	RAT18809	0	mRNA	LOC686120	hypothetical protein LOC686120	NA	NA	NR_026689	NA	NA	NA	NA_x000D_
RAT01347	6.6248	P	5.56113	P	2.09024	2.09024	up	0	RAT01347	0	mRNA	Csrp2	cysteine and glycine-rich protein 2	NA	NA	NM_177425	NA	NA	NA	NA_x000D_
RAT20046	8.99161	P	10.2718	P	0.411733	2.42876	down	0	RAT20046	0	mRNA	Ppp1r3c	"protein phosphatase 1, regulatory subunit 3C"	NA	NA	NM_001012072	NA	NA	NA	NA_x000D_
RAT08711	2.47255	A	5.33185	P	0.137806	7.2566	down	0	RAT08711	0	mRNA	Slc26a5	"solute carrier family 26, member 5 (prestin)"	NA	NA	NM_030840	NA	NA	NA	NA_x000D_
RAT19916	2.46215	A	6.66684	P	0.0542328	18.439	down	0	RAT19916	0	mRNA	NA	NA	NA	NA	TC628676	NA	NA	NA	NA_x000D_
RAT21566	10.7692	P	9.41082	P	2.56393	2.56393	up	0	RAT21566	0	mRNA	Cycs	"cytochrome c, somatic"	NA	NA	NM_012839	NA	NA	NA	NA_x000D_
RAT00117	4.79323	A	6.16649	P	0.386018	2.59055	down	0	RAT00117	0	mRNA	Klf5	Kruppel-like factor 5	NA	NA	NM_053394	NA	NA	NA	NA_x000D_
RAT02573	7.78526	P	6.76952	P	2.02194	2.02194	up	0	RAT02573	0	mRNA	Cdk17	cyclin-dependent kinase 17	NA	NA	NM_001108082	NA	NA	NA	NA_x000D_
RAT03837	4.67009	A	5.73595	P	0.477688	2.09342	down	0	RAT03837	0	mRNA	NA	NA	NA	NA	ENSRNOT00000030268	NA	NA	NA	NA_x000D_
RAT29583	6.43885	P	7.56228	P	0.459002	2.17864	down	0	RAT29583	0	mRNA	NA	NA	NA	NA	NA	NA	NA	NA	NA_x000D_
RAT02868	7.6354	P	6.46274	P	2.25427	2.25427	up	0	RAT02868	0	mRNA	Selrc1	Sel1 repeat containing 1	NA	NA	NM_001106674	NA	NA	NA	NA_x000D_
RAT20373	7.7409	P	6.16147	P	2.9885	2.9885	up	0	RAT20373	0	mRNA	Slc3a1	"solute carrier family 3, member 1"	NA	NA	NM_017216	NA	NA	NA	NA_x000D_
RAT23693	6.43061	P	7.75414	P	0.399557	2.50277	down	0	RAT23693	0	mRNA	NA	NA	NA	NA	ENSRNOT00000042331	NA	NA	NA	NA_x000D_
RAT24205	10.1979	P	11.3955	P	0.435991	2.29362	down	0	RAT24205	0	mRNA	RGD1309374	LOC361485	NA	NA	ENSRNOT00000020492	NA	NA	NA	NA_x000D_
RAT04917	8.11606	P	9.25631	P	0.453681	2.20419	down	0	RAT04917	0	mRNA	Lrrc57	leucine rich repeat containing 57	NA	NA	NM_001012354	NA	NA	NA	NA_x000D_
RAT25003	10.0683	P	8.81357	P	2.38621	2.38621	up	0	RAT25003	0	mRNA	Pgrmc1	progesterone receptor membrane component 1	NA	NA	NM_021766	NA	NA	NA	NA_x000D_
RAT21917	6.38199	P	4.732	A	3.13832	3.13832	up	0	RAT21917	0	mRNA	Ovol1	ovo-like 1(Drosophila)	NA	NA	NM_001107572	NA	NA	NA	NA_x000D_
RAT18690	5.59566	P	3.22381	A	5.17607	5.17607	up	0	RAT18690	0	mRNA	NA	NA	NA	NA	NA	NA	NA	NA	NA_x000D_
RAT01429	9.98707	P	8.73705	P	2.37845	2.37845	up	0	RAT01429	0	mRNA	Oxct1	3-oxoacid CoA transferase 1	NA	NA	NM_001127580	NA	NA	NA	NA_x000D_
RAT10761	11.9217	P	13.3111	P	0.381724	2.6197	down	0	RAT10761	0	mRNA	Tppp2	tubulin polymerization-promoting protein family member 2	NA	NA	NM_001109100	NA	NA	NA	NA_x000D_
RAT23923	2.746	A	5.46094	P	0.152307	6.56568	down	0	RAT23923	0	mRNA	NA	NA	NA	NA	NA	NA	NA	NA	NA_x000D_
RAT29548	10.8608	P	11.9856	P	0.458592	2.18059	down	0	RAT29548	0	mRNA	LOC686961	similar to Discs large homolog 5 (Placenta and prostate DLG) (Discs large protein P-dlg)	NA	NA	XM_001076499	NA	NA	NA	NA_x000D_
RAT06261	6.71034	P	5.50285	P	2.30935	2.30935	up	0	RAT06261	0	mRNA	Il2rb	"interleukin 2 receptor, beta"	NA	NA	NM_013195	NA	NA	NA	NA_x000D_
RAT22667	6.44541	P	7.47328	P	0.490434	2.03901	down	0	RAT22667	0	mRNA	RGD1564472	similar to Transcription elongation factor B polypeptide 3 binding protein 1	NA	NA	XM_001058314	NA	NA	NA	NA_x000D_
RAT13867	6.31112	P	7.4958	P	0.439925	2.27312	down	0	RAT13867	0	mRNA	RGD1306704	hypothetical LOC295483	NA	NA	XM_215709	NA	NA	NA	NA_x000D_
RAT22586	6.36211	P	2.5118	A	14.423	14.423	up	0	RAT22586	0	mRNA	Gpr50	G protein-coupled receptor 50	NA	NA	NM_001191915	NA	NA	NA	NA_x000D_
RAT14039	15.1823	P	13.9309	P	2.38086	2.38086	up	0	RAT14039	0	mRNA	Prom1	prominin 1	NA	NA	NM_021751	NA	NA	NA	NA_x000D_
RAT22467	6.3787	P	3.75419	A	6.16675	6.16675	up	0	RAT22467	0	mRNA	Snrpn	small nuclear ribonucleoprotein polypeptide N	NA	NA	NM_031117	NA	NA	NA	NA_x000D_
RAT27654	9.2419	P	10.512	P	0.41462	2.41185	down	0	RAT27654	0	mRNA	Zyx	zyxin	NA	NA	NM_053761	NA	NA	NA	NA_x000D_
RAT05762	6.71153	P	3.94401	A	6.80932	6.80932	up	0	RAT05762	0	mRNA	Muc1	"mucin 1, cell surface associated"	NA	NA	NM_012602	NA	NA	NA	NA_x000D_
RAT21344	3.93765	A	6.78144	P	0.139294	7.17905	down	0	RAT21344	0	mRNA	Scn4a	"sodium channel, voltage-gated, type IV, alpha subunit"	NA	NA	NM_013178	NA	NA	NA	NA_x000D_
RAT01440	7.23755	P	4.45294	A	6.89048	6.89048	up	0	RAT01440	0	mRNA	Ap1s1	"adaptor-related protein complex 1, sigma 1 subunit"	NA	NA	NM_001108331	NA	NA	NA	NA_x000D_
RAT28936	13.4414	P	14.7751	P	0.396755	2.52045	down	0	RAT28936	0	mRNA	LOC100188933	hypothetical protein LOC100188933	NA	NA	NM_001134695	NA	NA	NA	NA_x000D_
RAT05411	4.03803	A	5.23039	P	0.437587	2.28526	down	0	RAT05411	0	mRNA	Fgfr1-ps1	"fibroblast growth factor receptor 1, pseudogene 1"	NA	NA	U58466	NA	NA	NA	NA_x000D_
RAT00619	8.55583	P	9.89412	P	0.395488	2.52852	down	0	RAT00619	0	mRNA	Tssk2	testis-specific serine kinase 2	NA	NA	NM_001012019	NA	NA	NA	NA_x000D_
RAT09667	9.70736	P	12.8274	P	0.115019	8.69424	down	0	RAT09667	0	mRNA	Ucma	upper zone of growth plate and cartilage matrix associated	NA	NA	NM_001106121	NA	NA	NA	NA_x000D_
RAT05594	2.42343	A	7.90465	P	0.0223866	44.6696	down	0	RAT05594	0	mRNA	Kcna2	"potassium voltage-gated channel, shaker-related subfamily, member 2"	NA	NA	NM_012970	NA	NA	NA	NA_x000D_
RAT28792	7.08091	P	6.05052	P	2.04257	2.04257	up	0	RAT28792	0	mRNA	Prss22	"protease, serine, 22"	NA	NA	NM_001106984	NA	NA	NA	NA_x000D_
RAT11199	6.68931	P	8.586	P	0.268559	3.72357	down	0	RAT11199	0	mRNA	Bnc1	basonuclin 1	NA	NA	NM_001108916	NA	NA	NA	NA_x000D_
RAT16825	6.45922	P	4.80802	A	3.14095	3.14095	up	0	RAT16825	0	mRNA	Olr1614	olfactory receptor 1614	NA	NA	NM_001000841	NA	NA	NA	NA_x000D_
RAT18577	6.45055	P	4.29106	A	4.46756	4.46756	up	0	RAT18577	0	mRNA	Zfp469	zinc finger protein 469	NA	NA	NM_001107123	NA	NA	NA	NA_x000D_
RAT19488	5.73853	P	3.27797	A	5.50429	5.50429	up	0	RAT19488	0	mRNA	Camkmt	calmodulin-lysine N-methyltransferase	NA	NA	NM_001134463	NA	NA	NA	NA_x000D_
RAT24941	7.39756	P	6.34325	P	2.07673	2.07673	up	0	RAT24941	0	mRNA	Stau2	"staufen, RNA binding protein, homolog 2 (Drosophila)"	NA	NA	NM_134466	NA	NA	NA	NA_x000D_
RAT17600	2.9304	A	5.32972	P	0.189553	5.27556	down	0	RAT17600	0	mRNA	NA	NA	NA	NA	NA	NA	NA	NA	NA_x000D_
RAT16750	6.94125	P	8.32393	P	0.383506	2.60752	down	0	RAT16750	0	mRNA	Ccdc157	coiled-coil domain containing 157	NA	NA	ENSRNOT00000006911	NA	NA	NA	NA_x000D_
RAT18152	5.5547	P	6.84015	P	0.410244	2.43757	down	0	RAT18152	0	mRNA	LOC680029	similar to Spetex-2F protein	NA	NA	XM_001055404	NA	NA	NA	NA_x000D_
RAT06189	7.32407	P	8.99573	P	0.313892	3.18581	down	0	RAT06189	0	mRNA	NA	NA	NA	NA	ENSRNOT00000001606	NA	NA	NA	NA_x000D_
RAT25937	11.2363	P	13.5795	P	0.197067	5.07441	down	0	RAT25937	0	mRNA	NA	NA	NA	NA	ENSRNOT00000064626	NA	NA	NA	NA_x000D_
RAT21500	6.58006	P	3.61501	A	7.80855	7.80855	up	0	RAT21500	0	mRNA	NA	NA	NA	NA	TC633318	NA	NA	NA	NA_x000D_
RAT06139	6.22467	P	7.58147	P	0.390447	2.56117	down	0	RAT06139	0	mRNA	Cacna2d3	"calcium channel, voltage-dependent, alpha2/delta subunit 3"	NA	NA	NM_175595	NA	NA	NA	NA_x000D_
RAT15872	9.09013	P	8.06687	P	2.03251	2.03251	up	0	RAT15872	0	mRNA	Zc3h13	zinc finger CCCH type containing 13	NA	NA	NM_001170471	NA	NA	NA	NA_x000D_
RAT13715	7.93764	P	9.28777	P	0.392257	2.54935	down	0	RAT13715	0	mRNA	NA	NA	NA	NA	XM_346212	NA	NA	NA	NA_x000D_
RAT01488	8.81708	P	7.14672	P	3.18293	3.18293	up	0	RAT01488	0	mRNA	Fam213a	"family with sequence similarity 213, member A"	NA	NA	NM_001008297	NA	NA	NA	NA_x000D_
RAT08584	8.3228	P	7.0092	P	2.48561	2.48561	up	0	RAT08584	0	mRNA	FAM120C	family with sequence similarity 120C	NA	NA	XM_001068090	NA	NA	NA	NA_x000D_
RAT08725	5.3275	P	6.58453	P	0.418403	2.39004	down	0	RAT08725	0	mRNA	Cgn	cingulin	NA	NA	ENSRNOT00000028440	NA	NA	NA	NA_x000D_
RAT19830	11.2022	P	9.51724	P	3.21521	3.21521	up	0	RAT19830	0	mRNA	Rhox5	reproductive homeobox 5	NA	NA	NM_022175	NA	NA	NA	NA_x000D_
RAT14079	7.26163	P	6.18943	P	2.10263	2.10263	up	0	RAT14079	0	mRNA	Dlk2	delta-like 2 homolog (Drosophila)	NA	NA	NM_001108202	NA	NA	NA	NA_x000D_
RAT23182	6.2073	P	8.16255	P	0.257876	3.87783	down	0	RAT23182	0	mRNA	Nipal3	NIPA-like domain containing 3	NA	NA	CK480947	NA	NA	NA	NA_x000D_
RAT00360	7.09468	P	4.90016	A	4.57735	4.57735	up	0	RAT00360	0	mRNA	NA	NA	NA	NA	TC630587	NA	NA	NA	NA_x000D_
RAT23159	6.31521	P	7.72686	P	0.37588	2.66042	down	0	RAT23159	0	mRNA	tGap1	GTPase activating protein testicular GAP1	NA	NA	NM_001007635	NA	NA	NA	NA_x000D_
RAT25075	5.92051	P	4.62693	A	2.45135	2.45135	up	0	RAT25075	0	mRNA	Baat	bile acid CoA: amino acid N-acyltransferase (glycine N-choloyltransferase)	NA	NA	NM_017300	NA	NA	NA	NA_x000D_
RAT00787	6.68223	P	8.37124	P	0.31014	3.22435	down	0	RAT00787	0	mRNA	Ampd3	adenosine monophosphate deaminase 3	NA	NA	NM_031544	NA	NA	NA	NA_x000D_
RAT07990	6.16441	P	7.62345	P	0.363735	2.74925	down	0	RAT07990	0	mRNA	Gja1	"gap junction protein, alpha 1"	NA	NA	NM_012567	NA	NA	NA	NA_x000D_
RAT03874	6.22704	P	2.56861	A	12.627	12.627	up	0	RAT03874	0	mRNA	Mtrf1l	mitochondrial translational release factor 1-like	NA	NA	NM_001025723	NA	NA	NA	NA_x000D_
RAT00355	6.34026	P	4.61043	A	3.31691	3.31691	up	0	RAT00355	0	mRNA	Glce	glucuronic acid epimerase	NA	NA	XM_343404	NA	NA	NA	NA_x000D_
RAT09876	6.6758	P	5.16728	P	2.84518	2.84518	up	0	RAT09876	0	mRNA	Casp3	caspase 3	NA	NA	NM_012922	NA	NA	NA	NA_x000D_
RAT28853	6.51159	P	7.88562	P	0.385812	2.59193	down	0	RAT28853	0	mRNA	Cplx2	complexin 2	NA	NA	NM_053878	NA	NA	NA	NA_x000D_
RAT10464	5.79292	P	2.52373	A	9.64103	9.64103	up	0	RAT10464	0	mRNA	LOC689725	similar to chromosome 9 open reading frame 79	NA	NA	ENSRNOT00000037765	NA	NA	NA	NA_x000D_
RAT01108	8.41828	P	6.40458	P	4.03818	4.03818	up	0	RAT01108	0	mRNA	Sorcs2	sortilin-related VPS10 domain containing receptor 2	NA	NA	NM_001107225	NA	NA	NA	NA_x000D_
RAT06843	7.23904	P	8.36157	P	0.459287	2.17729	down	0	RAT06843	0	mRNA	Gfer	"growth factor, augmenter of liver regeneration"	NA	NA	NM_013222	NA	NA	NA	NA_x000D_
RAT21266	7.84184	P	9.0968	P	0.419004	2.38661	down	0	RAT21266	0	mRNA	Meig1	meiosis expressed gene 1	NA	NA	NM_001134882	NA	NA	NA	NA_x000D_
RAT23991	6.13955	P	2.49897	A	12.4716	12.4716	up	0	RAT23991	0	mRNA	Il13ra2	"interleukin 13 receptor, alpha 2"	NA	NA	NM_133538	NA	NA	NA	NA_x000D_
RAT00962	5.13577	P	4.11241	A	2.03265	2.03265	up	0	RAT00962	0	mRNA	Osbp	oxysterol binding protein	NA	NA	NM_001108927	NA	NA	NA	NA_x000D_
RAT16324	5.19235	P	3.99998	A	2.28528	2.28528	up	0	RAT16324	0	mRNA	NA	NA	NA	NA	NA	NA	NA	NA	NA_x000D_
RAT20186	11.3586	P	10.2311	P	2.18482	2.18482	up	0	RAT20186	0	mRNA	Fcgbpl1	Fc fragment of IgG binding protein-like 1	NA	NA	NM_001164656	NA	NA	NA	NA_x000D_
RAT27267	6.25059	P	7.58554	P	0.396408	2.52266	down	0	RAT27267	0	mRNA	NA	NA	NA	NA	NA	NA	NA	NA	NA_x000D_
RAT01990	6.61695	P	10.4809	P	0.0686792	14.5604	down	0	RAT01990	0	mRNA	Tm4sf1	transmembrane 4 L six family member 1	NA	NA	NM_001106434	NA	NA	NA	NA_x000D_
RAT19064	11.8158	P	12.9271	P	0.462881	2.16038	down	0	RAT19064	0	mRNA	NA	NA	NA	NA	NA	NA	NA	NA	NA_x000D_
RAT26129	9.27437	P	7.29234	P	3.95049	3.95049	up	0	RAT26129	0	mRNA	NA	NA	NA	NA	NA	NA	NA	NA	NA_x000D_
RAT21915	6.19768	P	7.63412	P	0.369477	2.70653	down	0	RAT21915	0	mRNA	Ier5	immediate early response 5	NA	NA	NM_001025137	NA	NA	NA	NA_x000D_
RAT22054	5.57896	P	7.02445	P	0.367167	2.72356	down	0	RAT22054	0	mRNA	NA	NA	NA	NA	ENSRNOT00000043578	NA	NA	NA	NA_x000D_
RAT25777	9.0651	P	10.0745	P	0.496758	2.01305	down	0	RAT25777	0	mRNA	LOC100364162	ring finger protein 11-like	NA	NA	XM_002726577	NA	NA	NA	NA_x000D_
RAT28694	5.85093	P	7.68152	P	0.28115	3.55682	down	0	RAT28694	0	mRNA	LOC100365983	rCG22366-like	NA	NA	ENSRNOT00000058340	NA	NA	NA	NA_x000D_
RAT30289	5.78989	P	6.82865	P	0.486746	2.05446	down	0	RAT30289	0	mRNA	Inpp5a	inositol polyphosphate-5-phosphatase A	NA	NA	NM_001108923	NA	NA	NA	NA_x000D_
RAT13587	8.3631	P	9.502	P	0.454107	2.20212	down	0	RAT13587	0	mRNA	Slc4a4	"solute carrier family 4, sodium bicarbonate cotransporter, member 4"	NA	NA	NM_053424	NA	NA	NA	NA_x000D_
RAT06413	2.50795	A	5.23554	P	0.150978	6.6235	down	0	RAT06413	0	mRNA	Cald1	caldesmon 1	NA	NA	ENSRNOT00000013630	NA	NA	NA	NA_x000D_
RAT22086	12.5302	P	13.5765	P	0.484202	2.06525	down	0	RAT22086	0	mRNA	LOC100360849	hypothetical protein LOC100360849	NA	NA	XM_002729568	NA	NA	NA	NA_x000D_
RAT04458	6.01962	P	4.39772	A	3.07781	3.07781	up	0	RAT04458	0	mRNA	RGD1307934	"similar to DNA segment, Chr 19, ERATO Doi 386, expressed"	NA	NA	ENSRNOT00000031133	NA	NA	NA	NA_x000D_
RAT09555	4.25132	A	6.54956	P	0.203311	4.91856	down	0	RAT09555	0	mRNA	Bcl2l11	BCL2-like 11 (apoptosis facilitator)	NA	NA	NM_171988	NA	NA	NA	NA_x000D_
RAT20656	8.22454	P	7.05665	P	2.24683	2.24683	up	0	RAT20656	0	mRNA	Tsr2	"TSR2, 20S rRNA accumulation, homolog (S. cerevisiae)"	NA	NA	NM_001115027	NA	NA	NA	NA_x000D_
RAT12101	6.72067	P	7.74584	P	0.491354	2.03519	down	0	RAT12101	0	mRNA	Otos	otospiralin	NA	NA	NM_139188	NA	NA	NA	NA_x000D_
RAT01838	6.17932	P	5.1266	P	2.07443	2.07443	up	0	RAT01838	0	mRNA	Renbp	renin binding protein	NA	NA	NM_031095	NA	NA	NA	NA_x000D_
RAT14655	9.28241	P	8.08228	P	2.2976	2.2976	up	0	RAT14655	0	mRNA	Slc25a35	"solute carrier family 25, member 35"	NA	NA	NM_001109033	NA	NA	NA	NA_x000D_
RAT04629	2.46042	A	5.27716	P	0.141931	7.04568	down	0	RAT04629	0	mRNA	Cdh6	cadherin 6	NA	NA	NM_012927	NA	NA	NA	NA_x000D_
RAT09693	6.10833	P	7.73635	P	0.323532	3.09089	down	0	RAT09693	0	mRNA	Fank1	fibronectin type 3 and ankyrin repeat domains 1	NA	NA	NM_001008347	NA	NA	NA	NA_x000D_
RAT07186	2.57069	A	5.26316	P	0.154697	6.46423	down	0	RAT07186	0	mRNA	LOC680967	RAB1A-like protein-like	NA	NA	XM_002730137	NA	NA	NA	NA_x000D_
RAT06901	6.99249	P	8.44978	P	0.364177	2.74592	down	0	RAT06901	0	mRNA	LOC680758	similar to spermatogenesis associated glutamate (E)-rich protein 4d	NA	NA	XM_001058748	NA	NA	NA	NA_x000D_
RAT14677	2.49018	A	6.3958	P	0.0667251	14.9869	down	0	RAT14677	0	mRNA	Oas1d	2'-5' oligoadenylate synthetase 1D	NA	NA	NM_001009379	NA	NA	NA	NA_x000D_
RAT04068	8.53763	P	10.5063	P	0.25549	3.91404	down	0	RAT04068	0	mRNA	Slc39a8	"solute carrier family 39 (zinc transporter), member 8"	NA	NA	NM_001011952	NA	NA	NA	NA_x000D_
RAT06239	7.79004	P	11.0428	P	0.104914	9.53163	down	0	RAT06239	0	mRNA	Igfbp5	insulin-like growth factor binding protein 5	NA	NA	ENSRNOT00000023530	NA	NA	NA	NA_x000D_
RAT26441	8.60073	P	7.21056	P	2.6211	2.6211	up	0	RAT26441	0	mRNA	Shmt1	serine hydroxymethyltransferase 1 (soluble)	NA	NA	NM_001047842	NA	NA	NA	NA_x000D_
RAT06949	6.80567	P	8.33544	P	0.346333	2.88739	down	0	RAT06949	0	mRNA	Kank1	KN motif and ankyrin repeat domains 1	NA	NA	NM_001037197	NA	NA	NA	NA_x000D_
RAT14470	5.34248	P	4.0748	A	2.40774	2.40774	up	0	RAT14470	0	mRNA	LOC497952	similar to Ubiquitin-associated protein 2-like	NA	NA	XR_005763	NA	NA	NA	NA_x000D_
RAT00434	7.52405	P	5.8457	P	3.20063	3.20063	up	0	RAT00434	0	mRNA	Rerg	"RAS-like, estrogen-regulated, growth-inhibitor"	NA	NA	XM_578417	NA	NA	NA	NA_x000D_
RAT05963	6.89545	P	5.72203	P	2.25545	2.25545	up	0	RAT05963	0	mRNA	RGD1308299	similar to chromosome 6 open reading frame 130	NA	NA	NM_001134596	NA	NA	NA	NA_x000D_
RAT29116	5.54836	P	9.5673	P	0.0616847	16.2115	down	0	RAT29116	0	mRNA	Adam26b	a disintegrin and metallopeptidase domain 26B	NA	NA	NM_001135090	NA	NA	NA	NA_x000D_
RAT21115	9.36635	P	10.4036	P	0.487252	2.05233	down	0	RAT21115	0	mRNA	NA	NA	NA	NA	NA	NA	NA	NA	NA_x000D_
RAT19983	2.45846	A	7.38309	P	0.0329258	30.3714	down	0	RAT19983	0	mRNA	NA	NA	NA	NA	NA	NA	NA	NA	NA_x000D_
RAT02838	5.52901	P	3.92282	A	3.04446	3.04446	up	0	RAT02838	0	mRNA	Rdh14	retinol dehydrogenase 14 (all-trans/9-cis/11-cis)	NA	NA	NM_001109276	NA	NA	NA	NA_x000D_
RAT09419	9.40024	P	8.16452	P	2.35498	2.35498	up	0	RAT09419	0	mRNA	Atp13a4	ATPase type 13A4	NA	NA	NM_001191658	NA	NA	NA	NA_x000D_
RAT08372	4.14467	A	5.39619	P	0.420004	2.38093	down	0	RAT08372	0	mRNA	Slc1a4	"solute carrier family 1 (glutamate/neutral amino acid transporter), member 4"	NA	NA	NM_198763	NA	NA	NA	NA_x000D_
RAT18095	5.00208	A	7.48997	P	0.178267	5.60957	down	0	RAT18095	0	mRNA	Clic4	chloride intracellular channel 4	NA	NA	NM_031818	NA	NA	NA	NA_x000D_
RAT26667	7.71698	P	5.90358	P	3.5147	3.5147	up	0	RAT26667	0	mRNA	NA	NA	NA	NA	NA	NA	NA	NA	NA_x000D_
RAT08031	6.6269	P	4.56675	A	4.17031	4.17031	up	0	RAT08031	0	mRNA	RGD1563398	RGD1563398	NA	NA	ENSRNOT00000036545	NA	NA	NA	NA_x000D_
RAT22905	6.6515	P	8.60886	P	0.2575	3.88349	down	0	RAT22905	0	mRNA	Calml4	calmodulin-like 4	NA	NA	NM_001127575	NA	NA	NA	NA_x000D_
RAT17701	9.80246	P	12.402	P	0.16499	6.06098	down	0	RAT17701	0	mRNA	Pdpn	podoplanin	NA	NA	NM_019358	NA	NA	NA	NA_x000D_
RAT16005	8.94909	P	10.4642	P	0.349872	2.85819	down	0	RAT16005	0	mRNA	Cpz	carboxypeptidase Z	NA	NA	NM_031766	NA	NA	NA	NA_x000D_
RAT15213	8.47505	P	4.91998	A	11.7539	11.7539	up	0	RAT15213	0	mRNA	Tex10	testis expressed 10	NA	NA	NM_001106653	NA	NA	NA	NA_x000D_
RAT00006	7.11861	P	8.55678	P	0.369033	2.70978	down	0	RAT00006	0	mRNA	Ifitm6	interferon induced transmembrane protein 6	NA	NA	XM_219476	NA	NA	NA	NA_x000D_
RAT03449	7.42357	P	6.03534	P	2.61757	2.61757	up	0	RAT03449	0	mRNA	Pno1	partner of NOB1 homolog (S. cerevisiae)	NA	NA	NM_199083	NA	NA	NA	NA_x000D_
RAT00176	9.55891	P	8.35731	P	2.29995	2.29995	up	0	RAT00176	0	mRNA	Ppm1l	"protein phosphatase, Mg2+/Mn2+ dependent, 1L"	NA	NA	NM_001107681	NA	NA	NA	NA_x000D_
RAT17167	5.47716	P	4.30401	A	2.25504	2.25504	up	0	RAT17167	0	mRNA	Sdcbp2	syndecan binding protein (syntenin) 2	NA	NA	NM_001025692	NA	NA	NA	NA_x000D_
RAT16710	15.6746	P	14.2516	P	2.68145	2.68145	up	0	RAT16710	0	mRNA	Ces5a	carboxylesterase 5A	NA	NA	NM_001012056	NA	NA	NA	NA_x000D_
RAT09227	6.25542	P	4.85887	A	2.63271	2.63271	up	0	RAT09227	0	mRNA	Gys2	glycogen synthase 2	NA	NA	NM_013089	NA	NA	NA	NA_x000D_
RAT16096	6.97042	P	7.97241	P	0.499313	2.00275	down	0	RAT16096	0	mRNA	Bmx	BMX non-receptor tyrosine kinase	NA	NA	NM_001109016	NA	NA	NA	NA_x000D_
RAT19438	9.05926	P	10.2367	P	0.442145	2.2617	down	0	RAT19438	0	mRNA	NA	NA	NA	NA	NA	NA	NA	NA	NA_x000D_
RAT10450	7.51552	P	9.35434	P	0.27955	3.57717	down	0	RAT10450	0	mRNA	Tgfbi	"transforming growth factor, beta induced"	NA	NA	NM_053802	NA	NA	NA	NA_x000D_
RAT10339	7.17654	P	5.447	P	3.31623	3.31623	up	0	RAT10339	0	mRNA	Mab21l3	mab-21-like 3 (C. elegans)	NA	NA	NM_001106456	NA	NA	NA	NA_x000D_
RAT16870	9.35145	P	10.7692	P	0.374302	2.67164	down	0	RAT16870	0	mRNA	RGD1560803	RGD1560803	NA	NA	XM_001066194	NA	NA	NA	NA_x000D_
RAT03634	10.6964	P	11.9772	P	0.411555	2.42981	down	0	RAT03634	0	mRNA	Spata20	spermatogenesis associated 20	NA	NA	NM_199402	NA	NA	NA	NA_x000D_
RAT21731	5.91077	P	8.32895	P	0.187091	5.34498	down	0	RAT21731	0	mRNA	NA	NA	NA	NA	ENSRNOT00000062082	NA	NA	NA	NA_x000D_
RAT15534	5.42616	P	6.4414	P	0.494746	2.02124	down	0	RAT15534	0	mRNA	NA	NA	NA	NA	TC609556	NA	NA	NA	NA_x000D_
RAT20572	4.91226	A	7.78727	P	0.136313	7.33607	down	0	RAT20572	0	mRNA	Gpr68	G protein-coupled receptor 68	NA	NA	NM_001108049	NA	NA	NA	NA_x000D_
RAT21815	5.87464	P	4.87266	A	2.00275	2.00275	up	0	RAT21815	0	mRNA	Tmem186	transmembrane protein 186	NA	NA	NM_001025756	NA	NA	NA	NA_x000D_
RAT09977	8.49495	P	7.26925	P	2.33869	2.33869	up	0	RAT09977	0	mRNA	Slc33a1	"solute carrier family 33 (acetyl-CoA transporter), member 1"	NA	NA	NM_022252	NA	NA	NA	NA_x000D_
RAT07583	5.58308	P	2.57506	A	8.04459	8.04459	up	0	RAT07583	0	mRNA	Emr1	"EGF-like module containing, mucin-like, hormone receptor-like 1"	NA	NA	NM_001007557	NA	NA	NA	NA_x000D_
RAT12251	10.024	P	11.2658	P	0.42286	2.36485	down	0	RAT12251	0	mRNA	Wdr38	WD repeat domain 38	NA	NA	XM_575125	NA	NA	NA	NA_x000D_
RAT15759	5.95113	P	4.2662	A	3.21524	3.21524	up	0	RAT15759	0	mRNA	NA	NA	NA	NA	XM_224125	NA	NA	NA	NA_x000D_
RAT02862	9.15962	P	10.9087	P	0.297493	3.36143	down	0	RAT02862	0	mRNA	Ogn	osteoglycin	NA	NA	NM_001106103	NA	NA	NA	NA_x000D_
RAT10548	9.87114	P	11.5785	P	0.306213	3.2657	down	0	RAT10548	0	mRNA	Dnajb8	"DnaJ (Hsp40) homolog, subfamily B, member 8"	NA	NA	NM_001109248	NA	NA	NA	NA_x000D_
RAT25510	11.4144	P	12.7613	P	0.39313	2.54368	down	0	RAT25510	0	mRNA	NA	NA	NA	NA	ENSRNOT00000051268	NA	NA	NA	NA_x000D_
RAT15686	8.54273	P	9.71969	P	0.442283	2.261	down	0	RAT15686	0	mRNA	Cfh	complement factor H	NA	NA	NM_130409	NA	NA	NA	NA_x000D_
RAT27553	4.30903	A	7.08545	P	0.145953	6.85154	down	0	RAT27553	0	mRNA	Wt1	Wilms tumor 1	NA	NA	NM_031534	NA	NA	NA	NA_x000D_
RAT25191	10.8908	P	9.77421	P	2.16832	2.16832	up	0	RAT25191	0	mRNA	Tgoln1	trans-golgi network protein	NA	NA	NM_138840	NA	NA	NA	NA_x000D_
RAT00869	6.56916	P	7.6347	P	0.477794	2.09295	down	0	RAT00869	0	mRNA	Scara5	"scavenger receptor class A, member 5 (putative)"	NA	NA	NM_001135855	NA	NA	NA	NA_x000D_
RAT23968	12.7063	P	11.5551	P	2.22091	2.22091	up	0	RAT23968	0	mRNA	Spint2	"serine peptidase inhibitor, Kunitz type, 2"	NA	NA	NM_001082549	NA	NA	NA	NA_x000D_
RAT29352	5.27802	P	4.09636	A	2.26839	2.26839	up	0	RAT29352	0	mRNA	Kctd11	potassium channel tetramerisation domain containing 11	NA	NA	NM_001108831	NA	NA	NA	NA_x000D_
RAT10088	5.0177	A	6.70544	P	0.310413	3.22152	down	0	RAT10088	0	mRNA	NA	NA	NA	NA	ENSRNOT00000068211	NA	NA	NA	NA_x000D_
RAT25390	6.39197	P	7.85973	P	0.361545	2.76591	down	0	RAT25390	0	mRNA	RGD1563680	similar to CDNA sequence BC052040	NA	NA	ENSRNOT00000006177	NA	NA	NA	NA_x000D_
RAT28627	4.88563	A	5.9351	P	0.483145	2.06977	down	0	RAT28627	0	mRNA	NA	NA	NA	NA	NA	NA	NA	NA	NA_x000D_
RAT01979	10.6055	P	13.6383	P	0.122194	8.18372	down	0	RAT01979	0	mRNA	Upk1b	uroplakin 1B	NA	NA	NM_001024253	NA	NA	NA	NA_x000D_
RAT00710	5.79671	P	4.29782	A	2.82626	2.82626	up	0	RAT00710	0	mRNA	Epha4	Eph receptor A4	NA	NA	NM_001162411	NA	NA	NA	NA_x000D_
RAT03530	5.55153	P	3.91002	A	3.11993	3.11993	up	0	RAT03530	0	mRNA	Gtse1	G-2 and S-phase expressed 1	NA	NA	NM_001130500	NA	NA	NA	NA_x000D_
RAT18600	11.8261	P	10.1903	P	3.10757	3.10757	up	0	RAT18600	0	mRNA	Defb23	defensin beta 23	NA	NA	NM_001037518	NA	NA	NA	NA_x000D_
RAT24580	12.6363	P	13.6746	P	0.486901	2.0538	down	0	RAT24580	0	mRNA	NA	NA	NA	NA	NA	NA	NA	NA	NA_x000D_
RAT12660	6.41214	P	8.02534	P	0.326874	3.05928	down	0	RAT12660	0	mRNA	Wdr44	WD repeat domain 44	NA	NA	ENSRNOT00000040742	NA	NA	NA	NA_x000D_
RAT00858	6.99406	P	8.03246	P	0.486866	2.05395	down	0	RAT00858	0	mRNA	Pglyrp1	peptidoglycan recognition protein 1	NA	NA	NM_053373	NA	NA	NA	NA_x000D_
RAT19030	12.4041	P	11.1569	P	2.37382	2.37382	up	0	RAT19030	0	mRNA	Aifm1	"apoptosis-inducing factor, mitochondrion-associated 1"	NA	NA	NM_031356	NA	NA	NA	NA_x000D_
RAT28061	5.2431	P	7.18505	P	0.260265	3.84224	down	0	RAT28061	0	mRNA	Fam180a	"family with sequence similarity 180, member A"	NA	NA	NM_001108621	NA	NA	NA	NA_x000D_
RAT02093	6.29077	P	7.50283	P	0.431651	2.31669	down	0	RAT02093	0	mRNA	Kdr	kinase insert domain receptor	NA	NA	NM_013062	NA	NA	NA	NA_x000D_
RAT01786	7.23093	P	6.17429	P	2.08009	2.08009	up	0	RAT01786	0	mRNA	Trappc10	trafficking protein particle complex 10	NA	NA	NM_001173528	NA	NA	NA	NA_x000D_
RAT20368	4.92966	A	6.89988	P	0.255213	3.9183	down	0	RAT20368	0	mRNA	NA	NA	NA	NA	NA	NA	NA	NA	NA_x000D_
RAT02924	5.647	P	3.84639	A	3.48367	3.48367	up	0	RAT02924	0	mRNA	Naaa	N-acylethanolamine acid amidase	NA	NA	NM_001010967	NA	NA	NA	NA_x000D_
RAT24524	10.1629	P	11.5138	P	0.392058	2.55065	down	0	RAT24524	0	mRNA	LOC100363290	hypothetical protein LOC100363290	NA	NA	XM_002728135	NA	NA	NA	NA_x000D_
RAT22881	6.10756	P	2.51437	A	12.0686	12.0686	up	0	RAT22881	0	mRNA	Lair1	leukocyte-associated immunoglobulin-like receptor 1	NA	NA	NM_001029928	NA	NA	NA	NA_x000D_
RAT13701	14.7336	P	13.3558	P	2.5987	2.5987	up	0	RAT13701	0	mRNA	Eddm3b	epididymal protein 3B	NA	NA	NM_178103	NA	NA	NA	NA_x000D_
RAT24768	9.68787	P	12.5269	P	0.139759	7.15516	down	0	RAT24768	0	mRNA	NA	NA	NA	NA	ENSRNOT00000055754	NA	NA	NA	NA_x000D_
RAT10268	5.64744	P	4.54795	A	2.14279	2.14279	up	0	RAT10268	0	mRNA	RGD1359127	similar to RIKEN cDNA 2310011J03	NA	NA	NM_001007657	NA	NA	NA	NA_x000D_
RAT06063	4.54688	A	6.45121	P	0.267139	3.74337	down	0	RAT06063	0	mRNA	St3gal2	"ST3 beta-galactoside alpha-2,3-sialyltransferase 2"	NA	NA	NM_031695	NA	NA	NA	NA_x000D_
RAT11149	5.94269	P	4.41099	A	2.89127	2.89127	up	0	RAT11149	0	mRNA	Npat	"nuclear protein, ataxia-telangiectasia locus"	NA	NA	NM_001108147	NA	NA	NA	NA_x000D_
RAT22272	7.18636	P	5.8694	P	2.4914	2.4914	up	0	RAT22272	0	mRNA	RGD1566265	similar to RIKEN cDNA 2610002M06	NA	NA	NM_001134589	NA	NA	NA	NA_x000D_
RAT18606	10.7452	P	11.8242	P	0.473339	2.11265	down	0	RAT18606	0	mRNA	Cyba	"cytochrome b-245, alpha polypeptide"	NA	NA	NM_024160	NA	NA	NA	NA_x000D_
RAT13591	7.57096	P	6.50333	P	2.09598	2.09598	up	0	RAT13591	0	mRNA	Rassf7	Ras association (RalGDS/AF-6) domain family (N-terminal) member 7	NA	NA	NM_001106317	NA	NA	NA	NA_x000D_
RAT01574	10.0946	P	8.97151	P	2.1781	2.1781	up	0	RAT01574	0	mRNA	Enc1	ectodermal-neural cortex 1	NA	NA	NM_001003401	NA	NA	NA	NA_x000D_
RAT18237	8.38029	P	9.56847	P	0.438855	2.27866	down	0	RAT18237	0	mRNA	Rhbdl1	"rhomboid, veinlet-like 1 (Drosophila)"	NA	NA	NM_001191822	NA	NA	NA	NA_x000D_
RAT11477	2.41277	A	5.15472	P	0.149483	6.68974	down	0	RAT11477	0	mRNA	Trim29	tripartite motif-containing 29	NA	NA	NM_001106815	NA	NA	NA	NA_x000D_
RAT19693	5.94824	P	7.87015	P	0.263904	3.78925	down	0	RAT19693	0	mRNA	NA	NA	NA	NA	ENSRNOT00000030247	NA	NA	NA	NA_x000D_
RAT05333	4.52648	A	6.1356	P	0.327798	3.05066	down	0	RAT05333	0	mRNA	Slit2	slit homolog 2 (Drosophila)	NA	NA	NM_022632	NA	NA	NA	NA_x000D_
RAT26056	9.42442	P	8.34166	P	2.11809	2.11809	up	0	RAT26056	0	mRNA	Mthfd2	"methylenetetrahydrofolate dehydrogenase (NADP+ dependent) 2, methenyltetrahydrofolate cyclohydrolase"	NA	NA	NM_001109398	NA	NA	NA	NA_x000D_
RAT04431	4.66198	A	6.08707	P	0.372396	2.68531	down	0	RAT04431	0	mRNA	Lrriq1	leucine-rich repeats and IQ motif containing 1	NA	NA	XM_001080693	NA	NA	NA	NA_x000D_
RAT04916	6.10533	P	7.18248	P	0.473966	2.10985	down	0	RAT04916	0	mRNA	Xrcc4	X-ray repair complementing defective repair in Chinese hamster cells 4	NA	NA	NM_001006999	NA	NA	NA	NA_x000D_
RAT24533	5.99093	P	7.19077	P	0.435325	2.29713	down	0	RAT24533	0	mRNA	NA	NA	NA	NA	TC591400	NA	NA	NA	NA_x000D_
RAT06776	6.02355	P	4.29309	A	3.31832	3.31832	up	0	RAT06776	0	mRNA	Nkiras2	NFKB inhibitor interacting Ras-like 2	NA	NA	NM_001105839	NA	NA	NA	NA_x000D_
RAT29518	11.3199	P	10.1122	P	2.30971	2.30971	up	0	RAT29518	0	mRNA	Psat1	phosphoserine aminotransferase 1	NA	NA	NM_198738	NA	NA	NA	NA_x000D_
RAT20443	10.3453	P	7.28911	P	8.31749	8.31749	up	0	RAT20443	0	mRNA	Defb41	defensin beta 41	NA	NA	NM_001037526	NA	NA	NA	NA_x000D_
RAT20619	9.60457	P	10.9579	P	0.39139	2.555	down	0	RAT20619	0	mRNA	Dtx2	deltex homolog 2 (Drosophila)	NA	NA	NM_001107157	NA	NA	NA	NA_x000D_
RAT07097	6.60243	P	5.41837	P	2.27215	2.27215	up	0	RAT07097	0	mRNA	Dctn1	dynactin 1	NA	NA	NM_024130	NA	NA	NA	NA_x000D_
RAT05831	10.6185	P	8.9791	P	3.11533	3.11533	up	0	RAT05831	0	mRNA	Dlgap5	"discs, large (Drosophila) homolog-associated protein 5"	NA	NA	NM_001135802	NA	NA	NA	NA_x000D_
RAT28808	5.86222	P	7.18969	P	0.398468	2.50961	down	0	RAT28808	0	mRNA	LOC688302	similar to spermatogenesis associated glutamate (E)-rich protein 4d	NA	NA	XM_002730119	NA	NA	NA	NA_x000D_
RAT27439	6.29009	P	5.22228	P	2.09625	2.09625	up	0	RAT27439	0	mRNA	RGD1311874	hypothetical LOC300751	NA	NA	NM_001106825	NA	NA	NA	NA_x000D_
RAT19708	6.0558	P	4.5483	A	2.84317	2.84317	up	0	RAT19708	0	mRNA	P2ry1	"purinergic receptor P2Y, G-protein coupled, 1"	NA	NA	NM_012800	NA	NA	NA	NA_x000D_
RAT21236	6.68179	P	5.37252	P	2.47816	2.47816	up	0	RAT21236	0	mRNA	Hint3	histidine triad nucleotide binding protein 3	NA	NA	ENSRNOT00000019047	NA	NA	NA	NA_x000D_
RAT03129	5.40052	P	3.87825	A	2.87244	2.87244	up	0	RAT03129	0	mRNA	Meis3	Meis homeobox 3	NA	NA	NM_001108472	NA	NA	NA	NA_x000D_
RAT27559	9.34469	P	11.2201	P	0.27255	3.66906	down	0	RAT27559	0	mRNA	Cabp4	calcium binding protein 4	NA	NA	NM_001108926	NA	NA	NA	NA_x000D_
RAT12944	10.32	P	9.1959	P	2.17961	2.17961	up	0	RAT12944	0	mRNA	Eid3	EP300 interacting inhibitor of differentiation 3	NA	NA	NM_001044304	NA	NA	NA	NA_x000D_
RAT24005	7.99782	P	9.12994	P	0.456245	2.19181	down	0	RAT24005	0	mRNA	Ctxn1	cortexin 1	NA	NA	NM_001109935	NA	NA	NA	NA_x000D_
RAT01450	6.48062	P	5.22655	A	2.38514	2.38514	up	0	RAT01450	0	mRNA	LOC684352	similar to twinfilin-like protein	NA	NA	NM_001135238	NA	NA	NA	NA_x000D_
RAT18506	15.8325	P	14.4383	P	2.6285	2.6285	up	0	RAT18506	0	mRNA	Mif	macrophage migration inhibitory factor	NA	NA	S73424	NA	NA	NA	NA_x000D_
RAT11700	10.7254	P	11.8712	P	0.451946	2.21266	down	0	RAT11700	0	mRNA	LOC500846	hypothetical protein LOC500846	NA	NA	NM_001047962	NA	NA	NA	NA_x000D_
RAT01350	10.3309	P	12.3181	P	0.252239	3.96449	down	0	RAT01350	0	mRNA	LOC683470	similar to growth arrest specific 1	NA	NA	XM_001066058	NA	NA	NA	NA_x000D_
RAT01793	5.39619	P	7.19755	P	0.286904	3.48548	down	0	RAT01793	0	mRNA	Gpx8	glutathione peroxidase 8	NA	NA	NM_001106411	NA	NA	NA	NA_x000D_
RAT17601	7.38207	P	8.68556	P	0.405144	2.46826	down	0	RAT17601	0	mRNA	LOC689257	similar to G protein-coupled receptor 133	NA	NA	ENSRNOT00000058586	NA	NA	NA	NA_x000D_
RAT03700	8.33323	P	10.7271	P	0.190272	5.25565	down	0	RAT03700	0	mRNA	C3	complement component 3	NA	NA	NM_016994	NA	NA	NA	NA_x000D_
RAT07208	6.30275	P	5.22442	P	2.11159	2.11159	up	0	RAT07208	0	mRNA	NA	NA	NA	NA	NA	NA	NA	NA	NA_x000D_
RAT13255	5.1273	P	6.16829	P	0.485994	2.05764	down	0	RAT13255	0	mRNA	NA	NA	NA	NA	ENSRNOT00000046676	NA	NA	NA	NA_x000D_
RAT23127	2.5449	A	5.23919	P	0.154503	6.47237	down	0	RAT23127	0	mRNA	NA	NA	NA	NA	XM_237569	NA	NA	NA	NA_x000D_
RAT16059	13.2592	P	15.2671	P	0.248631	4.02203	down	0	RAT16059	0	mRNA	Sdsl	serine dehydratase-like	NA	NA	NM_001108336	NA	NA	NA	NA_x000D_
RAT16102	6.26444	P	4.89138	A	2.59019	2.59019	up	0	RAT16102	0	mRNA	Spinlw1	"serine peptidase inhibitor-like, with Kunitz and WAP domains 1 (eppin)"	NA	NA	GQ406385	NA	NA	NA	NA_x000D_
RAT25515	6.55032	P	8.34208	P	0.288819	3.46237	down	0	RAT25515	0	mRNA	Ang	"angiogenin, ribonuclease, RNase A family, 5"	NA	NA	NM_001012359	NA	NA	NA	NA_x000D_
RAT22922	9.71442	P	8.6562	P	2.08236	2.08236	up	0	RAT22922	0	mRNA	Hdhd2	haloacid dehalogenase-like hydrolase domain containing 2	NA	NA	NM_001014151	NA	NA	NA	NA_x000D_
RAT06527	7.96673	P	8.96771	P	0.499661	2.00136	down	0	RAT06527	0	mRNA	Csrnp1	cysteine-serine-rich nuclear protein 1	NA	NA	NM_001108786	NA	NA	NA	NA_x000D_
RAT07653	11.5583	P	10.4804	P	2.11089	2.11089	up	0	RAT07653	0	mRNA	Ipmk	inositol polyphosphate multikinase	NA	NA	NM_134417	NA	NA	NA	NA_x000D_
RAT01551	10.8274	P	8.96843	P	3.62747	3.62747	up	0	RAT01551	0	mRNA	Cd1d1	CD1d1 molecule	NA	NA	NM_017079	NA	NA	NA	NA_x000D_
RAT22879	2.53246	A	5.99558	P	0.0906766	11.0282	down	0	RAT22879	0	mRNA	RGD1559615	similar to ankyrin repeat domain 26	NA	NA	XM_225620	NA	NA	NA	NA_x000D_
RAT00630	8.96597	P	7.94731	P	2.02602	2.02602	up	0	RAT00630	0	mRNA	NA	NA	NA	NA	TC622715	NA	NA	NA	NA_x000D_
RAT04377	8.67522	P	7.62989	P	2.06384	2.06384	up	0	RAT04377	0	mRNA	Setd3	SET domain containing 3	NA	NA	ENSRNOT00000009120	NA	NA	NA	NA_x000D_
RAT09418	10.1635	P	11.4534	P	0.408976	2.44513	down	0	RAT09418	0	mRNA	St6galnac2	"ST6 (alpha-N-acetyl-neuraminyl-2,3-beta-galactosyl-1,3)-N-acetylgalactosaminide alpha-2,6-sialyltransferase 2"	NA	NA	NM_001031652	NA	NA	NA	NA_x000D_
RAT09436	3.97805	A	5.32243	P	0.393822	2.53922	down	0	RAT09436	0	mRNA	Mtmr7	myotubularin related protein 7	NA	NA	NM_001107312	NA	NA	NA	NA_x000D_
RAT14521	7.59641	P	8.89336	P	0.406986	2.45709	down	0	RAT14521	0	mRNA	Ehd2	EH-domain containing 2	NA	NA	NM_001024897	NA	NA	NA	NA_x000D_
RAT00260	5.80543	P	7.33122	P	0.347291	2.87943	down	0	RAT00260	0	mRNA	Tmem204	transmembrane protein 204	NA	NA	NM_001009620	NA	NA	NA	NA_x000D_
RAT11363	6.81205	P	3.88266	A	7.61789	7.61789	up	0	RAT11363	0	mRNA	Npas2	neuronal PAS domain protein 2	NA	NA	NM_001108214	NA	NA	NA	NA_x000D_
RAT03726	7.06882	P	8.87271	P	0.2864	3.49162	down	0	RAT03726	0	mRNA	Ccdc37	coiled-coil domain containing 37	NA	NA	ENSRNOT00000024222	NA	NA	NA	NA_x000D_
RAT17961	10.8942	P	11.9145	P	0.493024	2.0283	down	0	RAT17961	0	mRNA	LOC680590	hypothetical protein LOC680590	NA	NA	NR_036618	NA	NA	NA	NA_x000D_
RAT07404	4.74342	A	6.81547	P	0.237822	4.20482	down	0	RAT07404	0	mRNA	Kng1	kininogen 1	NA	NA	NM_012696	NA	NA	NA	NA_x000D_
RAT06920	6.16704	P	4.70088	A	2.76286	2.76286	up	0	RAT06920	0	mRNA	Tfrc	transferrin receptor	NA	NA	NM_022712	NA	NA	NA	NA_x000D_
RAT11115	5.82798	P	4.7234	A	2.15036	2.15036	up	0	RAT11115	0	mRNA	NA	NA	NA	NA	TC586526	NA	NA	NA	NA_x000D_
RAT29492	6.43986	P	7.52365	P	0.47179	2.11959	down	0	RAT29492	0	mRNA	NA	NA	NA	NA	NA	NA	NA	NA	NA_x000D_
RAT03426	2.55847	A	5.58885	P	0.122396	8.17019	down	0	RAT03426	0	mRNA	Tex15	testis expressed 15	NA	NA	NM_001106087	NA	NA	NA	NA_x000D_
RAT13066	8.8232	P	10.2163	P	0.380758	2.62634	down	0	RAT13066	0	mRNA	NA	NA	NA	NA	NA	NA	NA	NA	NA_x000D_
RAT03334	6.4413	P	7.47485	P	0.488506	2.04706	down	0	RAT03334	0	mRNA	Spaca3	sperm acrosome associated 3	NA	NA	NM_001105820	NA	NA	NA	NA_x000D_
RAT08436	6.85851	P	8.10977	P	0.420081	2.38049	down	0	RAT08436	0	mRNA	Akr1b8	"aldo-keto reductase family 1, member B8"	NA	NA	NM_173136	NA	NA	NA	NA_x000D_
RAT01428	4.92311	A	6.30506	P	0.383701	2.6062	down	0	RAT01428	0	mRNA	Spib	Spi-B transcription factor (Spi-1/PU.1 related)	NA	NA	NM_001024286	NA	NA	NA	NA_x000D_
RAT29333	6.16533	P	5.11992	A	2.06395	2.06395	up	0	RAT29333	0	mRNA	Txnrd2	thioredoxin reductase 2	NA	NA	NM_022584	NA	NA	NA	NA_x000D_
RAT25325	4.12053	A	5.71598	P	0.330919	3.02189	down	0	RAT25325	0	mRNA	Smoc2	SPARC related modular calcium binding 2	NA	NA	NM_001106215	NA	NA	NA	NA_x000D_
RAT13514	10.4203	P	11.5857	P	0.445856	2.24287	down	0	RAT13514	0	mRNA	Sap25	Sin3A-associated protein 25	NA	NA	XM_001076431	NA	NA	NA	NA_x000D_
RAT00196	7.07378	P	8.31096	P	0.424198	2.35739	down	0	RAT00196	0	mRNA	Armc9	armadillo repeat containing 9	NA	NA	NM_001109663	NA	NA	NA	NA_x000D_
RAT17687	7.4076	P	9.92516	P	0.174639	5.72611	down	0	RAT17687	0	mRNA	Sema5a	"sema domain, seven thrombospondin repeats (type 1 and type 1-like), transmembrane domain (TM) and short cytoplasmic domain, (semaphorin) 5A"	NA	NA	NM_001107659	NA	NA	NA	NA_x000D_
RAT12932	5.0043	A	6.21445	P	0.432223	2.31362	down	0	RAT12932	0	mRNA	Abcb1b	"ATP-binding cassette, subfamily B (MDR/TAP), member 1B"	NA	NA	NM_012623	NA	NA	NA	NA_x000D_
RAT21781	8.41601	P	7.26701	P	2.21761	2.21761	up	0	RAT21781	0	mRNA	Zfp509	zinc finger protein 509	NA	NA	NM_001107223	NA	NA	NA	NA_x000D_
RAT26811	4.14092	A	5.43327	P	0.408286	2.44927	down	0	RAT26811	0	mRNA	NA	NA	NA	NA	NA	NA	NA	NA	NA_x000D_
RAT11450	4.27264	A	5.57166	P	0.406404	2.46061	down	0	RAT11450	0	mRNA	B3gnt2	"UDP-GlcNAc:betaGal beta-1,3-N-acetylglucosaminyltransferase 2"	NA	NA	NM_001107240	NA	NA	NA	NA_x000D_
RAT06048	7.62812	P	8.87644	P	0.42094	2.37563	down	0	RAT06048	0	mRNA	NA	NA	NA	NA	ENSRNOT00000051225	NA	NA	NA	NA_x000D_
RAT30346	4.24085	A	5.65896	P	0.374203	2.67234	down	0	RAT30346	0	mRNA	Dnah17	"dynein, axonemal, heavy chain 17"	NA	NA	ENSRNOT00000004047	NA	NA	NA	NA_x000D_
RAT19775	5.75959	P	6.80775	P	0.483587	2.06788	down	0	RAT19775	0	mRNA	NA	NA	NA	NA	ENSRNOT00000059438	NA	NA	NA	NA_x000D_
RAT01963	5.12052	P	2.40664	A	6.56087	6.56087	up	0	RAT01963	0	mRNA	Ptprd	"protein tyrosine phosphatase, receptor type, D"	NA	NA	XM_233065	NA	NA	NA	NA_x000D_
RAT00689	5.21932	P	6.56316	P	0.393971	2.53826	down	0	RAT00689	0	mRNA	Pbx2	pre-B-cell leukemia homeobox 2	NA	NA	NM_001002828	NA	NA	NA	NA_x000D_
RAT11118	8.36868	P	7.32989	P	2.05451	2.05451	up	0	RAT11118	0	mRNA	NA	NA	NA	NA	TC596046	NA	NA	NA	NA_x000D_
RAT19919	5.92534	P	7.53756	P	0.327095	3.05721	down	0	RAT19919	0	mRNA	NA	NA	NA	NA	NA	NA	NA	NA	NA_x000D_
RAT26170	7.44072	P	9.56765	P	0.228944	4.36787	down	0	RAT26170	0	mRNA	Meis1	Meis homeobox 1	NA	NA	NM_001134702	NA	NA	NA	NA_x000D_
RAT09895	5.62833	P	7.17046	P	0.343379	2.91224	down	0	RAT09895	0	mRNA	Lrp2bp	Lrp2 binding protein	NA	NA	NM_001017443	NA	NA	NA	NA_x000D_
RAT25990	6.4034	P	8.4347	P	0.244634	4.08774	down	0	RAT25990	0	mRNA	RGD1565367	"similar to Solute carrier family 23, member 2 (Sodium-dependent vitamin C transporter 2)"	NA	NA	XM_001067886	NA	NA	NA	NA_x000D_
RAT19447	3.32389	A	5.79122	P	0.180825	5.53021	down	0	RAT19447	0	mRNA	NA	NA	NA	NA	NA	NA	NA	NA	NA_x000D_
RAT12071	4.91791	A	6.27801	P	0.389553	2.56705	down	0	RAT12071	0	mRNA	NA	NA	NA	NA	XM_229294	NA	NA	NA	NA_x000D_
RAT13222	4.39534	A	5.49159	P	0.46773	2.13798	down	0	RAT13222	0	mRNA	Cxcl13	chemokine (C-X-C motif) ligand 13	NA	NA	NM_001017496	NA	NA	NA	NA_x000D_
RAT02308	8.23397	P	7.12253	P	2.16061	2.16061	up	0	RAT02308	0	mRNA	Impa1	Inositol (myo)-1(or 4)-monophosphatase 1	NA	NA	NM_032057	NA	NA	NA	NA_x000D_
RAT26212	7.38809	P	9.11268	P	0.302585	3.30486	down	0	RAT26212	0	mRNA	Upk1b	uroplakin 1B	NA	NA	NM_001024253	NA	NA	NA	NA_x000D_
RAT18758	7.81375	P	6.58155	P	2.34925	2.34925	up	0	RAT18758	0	mRNA	NA	NA	NA	NA	AABR03001102	NA	NA	NA	NA_x000D_
RAT10678	5.56486	P	3.17742	A	5.23229	5.23229	up	0	RAT10678	0	mRNA	MGC94891	hypothetical protein LOC681210	NA	NA	NM_001044277	NA	NA	NA	NA_x000D_
RAT22918	6.76541	P	5.596	P	2.24921	2.24921	up	0	RAT22918	0	mRNA	Cdc42se2	CDC42 small effector 2	NA	NA	NM_001126089	NA	NA	NA	NA_x000D_
RAT05116	5.6354	P	4.50632	A	2.18719	2.18719	up	0	RAT05116	0	mRNA	Spop	speckle-type POZ protein	NA	NA	NM_001100496	NA	NA	NA	NA_x000D_
RAT09085	4.734	A	8.30496	P	0.0841461	11.8841	down	0	RAT09085	0	mRNA	Klf2	Kruppel-like factor 2 (lung)	NA	NA	NM_001007684	NA	NA	NA	NA_x000D_
RAT10356	9.12673	P	7.92714	P	2.29675	2.29675	up	0	RAT10356	0	mRNA	Galnt1	UDP-N-acetyl-alpha-D-galactosamine:polypeptide N-acetylgalactosaminyltransferase 1 (GalNAc-T1)	NA	NA	ENSRNOT00000022117	NA	NA	NA	NA_x000D_
RAT13136	7.62772	P	6.59671	P	2.04345	2.04345	up	0	RAT13136	0	mRNA	Fhit	fragile histidine triad gene	NA	NA	NM_021774	NA	NA	NA	NA_x000D_
RAT29665	10.315	P	11.4948	P	0.441409	2.26547	down	0	RAT29665	0	mRNA	Hivep3	human immunodeficiency virus type I enhancer binding protein 3	NA	NA	NM_001107972	NA	NA	NA	NA_x000D_
RAT21416	9.2548	P	10.4422	P	0.439108	2.27734	down	0	RAT21416	0	mRNA	NA	NA	NA	NA	ENSRNOT00000050021	NA	NA	NA	NA_x000D_
RAT16445	12.5044	P	10.5577	P	3.85492	3.85492	up	0	RAT16445	0	mRNA	Svs4	seminal vesicle secretory protein 4	NA	NA	NM_012662	NA	NA	NA	NA_x000D_
RAT10347	7.77131	P	9.13275	P	0.389193	2.56942	down	0	RAT10347	0	mRNA	Gpr153	G protein-coupled receptor 153	NA	NA	NM_001034855	NA	NA	NA	NA_x000D_
RAT17761	2.46341	A	5.85547	P	0.095255	10.4981	down	0	RAT17761	0	mRNA	Pde4b	"phosphodiesterase 4B, cAMP specific"	NA	NA	NM_017031	NA	NA	NA	NA_x000D_
RAT00228	4.50799	A	7.33808	P	0.140624	7.11118	down	0	RAT00228	0	mRNA	Gata5	GATA binding protein 5	NA	NA	NM_001024316	NA	NA	NA	NA_x000D_
RAT16352	7.12657	P	4.92129	A	4.61164	4.61164	up	0	RAT16352	0	mRNA	Ubxn2a	UBX domain protein 2A	NA	NA	NM_001109482	NA	NA	NA	NA_x000D_
RAT00773	7.23423	P	6.0866	P	2.2155	2.2155	up	0	RAT00773	0	mRNA	RGD1305572	similar to hypothetical protein MGC30618	NA	NA	NM_001024970	NA	NA	NA	NA_x000D_
RAT24965	6.58766	P	5.48255	P	2.15115	2.15115	up	0	RAT24965	0	mRNA	Cbfa2t3	"core-binding factor, runt domain, alpha subunit 2; translocated to, 3"	NA	NA	NM_001108453	NA	NA	NA	NA_x000D_
RAT12735	6.27663	P	8.65839	P	0.191876	5.21169	down	0	RAT12735	0	mRNA	Foxs1	forkhead box S1	NA	NA	NM_001012091	NA	NA	NA	NA_x000D_
RAT11957	11.767	P	12.8301	P	0.478612	2.08937	down	0	RAT11957	0	mRNA	Asrgl1	asparaginase like 1	NA	NA	NM_145089	NA	NA	NA	NA_x000D_
RAT17685	7.69028	P	9.02587	P	0.396232	2.52377	down	0	RAT17685	0	mRNA	Cmtm2a	CKLF-like MARVEL transmembrane domain containing 2A	NA	NA	NM_001013142	NA	NA	NA	NA_x000D_
RAT05306	6.9385	P	3.4778	A	11.0097	11.0097	up	0	RAT05306	0	mRNA	O3far1	omega-3 fatty acid receptor 1	NA	NA	NM_001047088	NA	NA	NA	NA_x000D_
RAT14964	11.9327	P	10.5644	P	2.58172	2.58172	up	0	RAT14964	0	mRNA	Spink13	"serine peptidase inhibitor, Kazal type 13"	NA	NA	NM_001109539	NA	NA	NA	NA_x000D_
RAT22568	4.17984	A	5.22856	P	0.483395	2.0687	down	0	RAT22568	0	mRNA	LOC499276	similar to RIKEN cDNA 1700022C21	NA	NA	ENSRNOT00000031258	NA	NA	NA	NA_x000D_
RAT04364	7.09271	P	8.70138	P	0.3279	3.04971	down	0	RAT04364	0	mRNA	NA	NA	NA	NA	XM_343661	NA	NA	NA	NA_x000D_
RAT01033	6.55812	P	7.56107	P	0.498978	2.00409	down	0	RAT01033	0	mRNA	Slc41a1	"solute carrier family 41, member 1"	NA	NA	NM_001108855	NA	NA	NA	NA_x000D_
RAT08199	6.79005	P	5.66336	P	2.18357	2.18357	up	0	RAT08199	0	mRNA	Vcpip1	valosin containing protein (p97)/p47 complex interacting protein 1	NA	NA	ENSRNOT00000009136	NA	NA	NA	NA_x000D_
RAT22000	5.33984	P	4.05562	A	2.43551	2.43551	up	0	RAT22000	0	mRNA	Polr3g	polymerase (RNA) III (DNA directed) polypeptide G	NA	NA	NM_001109468	NA	NA	NA	NA_x000D_
RAT23731	5.25264	P	2.57838	A	6.38311	6.38311	up	0	RAT23731	0	mRNA	Ltc4s	leukotriene C4 synthase	NA	NA	NM_053639	NA	NA	NA	NA_x000D_
RAT03590	5.59152	P	7.0199	P	0.371548	2.69144	down	0	RAT03590	0	mRNA	Snx12	sorting nexin 12	NA	NA	NM_001108817	NA	NA	NA	NA_x000D_
RAT26303	4.57914	A	5.652	P	0.475377	2.10359	down	0	RAT26303	0	mRNA	LOC295528	similar to T06D8.1a	NA	NA	ENSRNOT00000012638	NA	NA	NA	NA_x000D_
RAT03558	7.63058	P	8.74497	P	0.461887	2.16503	down	0	RAT03558	0	mRNA	Phf7	PHD finger protein 7	NA	NA	NM_001012211	NA	NA	NA	NA_x000D_
RAT13131	6.28785	P	7.75132	P	0.362621	2.7577	down	0	RAT13131	0	mRNA	Slc26a3	"solute carrier family 26, member 3"	NA	NA	NM_053755	NA	NA	NA	NA_x000D_
RAT29804	7.01886	P	5.37078	P	3.13417	3.13417	up	0	RAT29804	0	mRNA	Pragmin	pragma of Rnd2	NA	NA	NM_001107315	NA	NA	NA	NA_x000D_
RAT29387	6.06721	P	4.47717	A	3.01058	3.01058	up	0	RAT29387	0	mRNA	Mier2	"mesoderm induction early response 1, family member 2"	NA	NA	NM_001108737	NA	NA	NA	NA_x000D_
RAT01156	10.4618	P	9.23753	P	2.33643	2.33643	up	0	RAT01156	0	mRNA	Slc2a1	"solute carrier family 2 (facilitated glucose transporter), member 1"	NA	NA	NM_138827	NA	NA	NA	NA_x000D_
RAT12466	5.08353	A	6.41095	P	0.39848	2.50954	down	0	RAT12466	0	mRNA	NA	NA	NA	NA	NA	NA	NA	NA	NA_x000D_
RAT00097	6.16326	P	8.62028	P	0.182122	5.49083	down	0	RAT00097	0	mRNA	Anxa8	annexin A8	NA	NA	NM_001031654	NA	NA	NA	NA_x000D_
RAT10585	7.32007	P	5.94283	P	2.59772	2.59772	up	0	RAT10585	0	mRNA	RGD1561149	similar to mKIAA1522 protein	NA	NA	NM_001134629	NA	NA	NA	NA_x000D_
RAT30314	11.4234	P	9.95086	P	2.77518	2.77518	up	0	RAT30314	0	mRNA	RGD1310313	similar to RIKEN cDNA 1110001M20	NA	NA	NM_001139465	NA	NA	NA	NA_x000D_
RAT12870	12.0376	P	10.6856	P	2.55268	2.55268	up	0	RAT12870	0	mRNA	Spink13	"serine peptidase inhibitor, Kazal type 13"	NA	NA	NM_001109539	NA	NA	NA	NA_x000D_
RAT13228	6.92959	P	5.90485	P	2.0346	2.0346	up	0	RAT13228	0	mRNA	Fdxacb1	ferredoxin-fold anticodon binding domain containing 1	NA	NA	NM_001108145	NA	NA	NA	NA_x000D_
RAT08966	6.18162	P	7.18858	P	0.497594	2.00967	down	0	RAT08966	0	mRNA	Gfap	glial fibrillary acidic protein	NA	NA	NM_017009	NA	NA	NA	NA_x000D_
RAT07788	10.3988	P	13.4836	P	0.117862	8.48451	down	0	RAT07788	0	mRNA	Igfbp6	insulin-like growth factor binding protein 6	NA	NA	NM_013104	NA	NA	NA	NA_x000D_
RAT00665	5.30468	P	8.42785	P	0.114771	8.71301	down	0	RAT00665	0	mRNA	RGD1559864	similar to mKIAA1045 protein	NA	NA	XM_575808	NA	NA	NA	NA_x000D_
RAT24091	10.7238	P	9.48913	P	2.35328	2.35328	up	0	RAT24091	0	mRNA	Hsd17b4	hydroxysteroid (17-beta) dehydrogenase 4	NA	NA	NM_024392	NA	NA	NA	NA_x000D_
RAT11274	6.47966	P	5.16334	A	2.49029	2.49029	up	0	RAT11274	0	mRNA	NA	NA	NA	NA	DV717012	NA	NA	NA	NA_x000D_
RAT19608	9.5432	P	7.35059	P	4.5713	4.5713	up	0	RAT19608	0	mRNA	NA	NA	NA	NA	ENSRNOT00000068483	NA	NA	NA	NA_x000D_
RAT26754	6.78872	P	5.15067	A	3.11245	3.11245	up	0	RAT26754	0	mRNA	NA	NA	NA	NA	NA	NA	NA	NA	NA_x000D_
RAT02427	8.04859	P	7.04577	P	2.00392	2.00392	up	0	RAT02427	0	mRNA	Atp2c1	"ATPase, Ca++ transporting, type 2C, member 1"	NA	NA	NM_131907	NA	NA	NA	NA_x000D_
RAT03817	7.82796	P	6.76806	P	2.08479	2.08479	up	0	RAT03817	0	mRNA	Ufl1	Ufm1-specific ligase 1	NA	NA	NM_001126279	NA	NA	NA	NA_x000D_
RAT22379	10.3147	P	11.6483	P	0.396797	2.52018	down	0	RAT22379	0	mRNA	Spetex-2A	Spetex-2A protein	NA	NA	NM_001009976	NA	NA	NA	NA_x000D_
RAT02209	9.08554	P	7.91773	P	2.24669	2.24669	up	0	RAT02209	0	mRNA	Prdx3	peroxiredoxin 3	NA	NA	NM_022540	NA	NA	NA	NA_x000D_
RAT10555	6.47543	P	5.14801	P	2.50953	2.50953	up	0	RAT10555	0	mRNA	Rpe	ribulose-5-phosphate-3-epimerase	NA	NA	NM_001033903	NA	NA	NA	NA_x000D_
RAT18603	5.74384	P	7.60499	P	0.275256	3.63298	down	0	RAT18603	0	mRNA	LOC685617	similar to spermatogenesis associated glutamate (E)-rich protein 4b	NA	NA	ENSRNOT00000042781	NA	NA	NA	NA_x000D_
RAT21362	6.86185	P	5.73815	P	2.17905	2.17905	up	0	RAT21362	0	mRNA	Adcy5	adenylate cyclase 5	NA	NA	NM_022600	NA	NA	NA	NA_x000D_
RAT10433	6.26767	P	4.51038	A	3.38063	3.38063	up	0	RAT10433	0	mRNA	Bri3bp	Bri3 binding protein	NA	NA	NM_001017487	NA	NA	NA	NA_x000D_
RAT25328	9.93374	P	8.75095	P	2.27014	2.27014	up	0	RAT25328	0	mRNA	Hspd1-ps2	"heat shock protein 1, pseudogene 2"	NA	NA	XR_005902	NA	NA	NA	NA_x000D_
RAT09415	4.76137	A	5.80365	P	0.48556	2.05948	down	0	RAT09415	0	mRNA	Fam46b	"family with sequence similarity 46, member B"	NA	NA	NM_001107907	NA	NA	NA	NA_x000D_
RAT27053	7.71569	P	9.3408	P	0.324186	3.08465	down	0	RAT27053	0	mRNA	LOC367390	hypothetical LOC367390	NA	NA	XM_346121	NA	NA	NA	NA_x000D_
RAT00385	6.7015	P	8.85298	P	0.225081	4.44284	down	0	RAT00385	0	mRNA	Ngb	neuroglobin	NA	NA	NM_033359	NA	NA	NA	NA_x000D_
RAT06361	7.25777	P	9.38522	P	0.228862	4.36945	down	0	RAT06361	0	mRNA	Mxra8	matrix-remodelling associated 8	NA	NA	NM_001007002	NA	NA	NA	NA_x000D_
RAT00755	11.0502	P	9.94664	P	2.14881	2.14881	up	0	RAT00755	0	mRNA	Tfg	Trk-fused gene	NA	NA	NM_001012144	NA	NA	NA	NA_x000D_
RAT21892	10.2284	P	8.10338	P	4.36205	4.36205	up	0	RAT21892	0	mRNA	Gpr98	G protein-coupled receptor 98	NA	NA	XM_002725894	NA	NA	NA	NA_x000D_
RAT08553	7.21351	P	5.99177	P	2.33229	2.33229	up	0	RAT08553	0	mRNA	Hmgb3	high mobility group box 3	NA	NA	NM_001173341	NA	NA	NA	NA_x000D_
RAT09361	6.38263	P	4.71426	A	3.17856	3.17856	up	0	RAT09361	0	mRNA	Foxq1	forkhead box Q1	NA	NA	NM_022858	NA	NA	NA	NA_x000D_
RAT21070	7.49787	P	6.45671	P	2.05788	2.05788	up	0	RAT21070	0	mRNA	Ptrh2	peptidyl-tRNA hydrolase 2	NA	NA	NM_001013860	NA	NA	NA	NA_x000D_
RAT25647	10.081	P	8.91036	P	2.25108	2.25108	up	0	RAT25647	0	mRNA	Sar1b	SAR1 homolog B (S. cerevisiae)	NA	NA	NM_001009622	NA	NA	NA	NA_x000D_
RAT00040	5.60595	P	6.98377	P	0.384801	2.59875	down	0	RAT00040	0	mRNA	Hdgfl1	hepatoma derived growth factor-like 1	NA	NA	NM_133549	NA	NA	NA	NA_x000D_
RAT27007	5.92047	P	3.34621	A	5.95564	5.95564	up	0	RAT27007	0	mRNA	Plvap	plasmalemma vesicle associated protein	NA	NA	NM_020086	NA	NA	NA	NA_x000D_
RAT01255	10.1669	P	8.42188	P	3.35201	3.35201	up	0	RAT01255	0	mRNA	Rcn2	"reticulocalbin 2, EF-hand calcium binding domain"	NA	NA	NM_017132	NA	NA	NA	NA_x000D_
RAT26590	9.39614	P	10.9415	P	0.342611	2.91876	down	0	RAT26590	0	mRNA	Pfn3	profilin 3	NA	NA	NM_001109487	NA	NA	NA	NA_x000D_
RAT29014	9.8317	P	11.602	P	0.293145	3.41128	down	0	RAT29014	0	mRNA	RGD1563405	similar to protein tyrosine phosphatase 4a2	NA	NA	ENSRNOT00000011900	NA	NA	NA	NA_x000D_
RAT26062	4.31777	A	5.71645	P	0.379275	2.63661	down	0	RAT26062	0	mRNA	RGD1565355	similar to fatty acid translocase/CD36	NA	NA	NM_001109218	NA	NA	NA	NA_x000D_
RAT11575	6.08724	P	7.82371	P	0.300104	3.33218	down	0	RAT11575	0	mRNA	Bace2	beta-site APP-cleaving enzyme 2	NA	NA	NM_001002802	NA	NA	NA	NA_x000D_
RAT11590	11.8852	P	10.3358	P	2.92695	2.92695	up	0	RAT11590	0	mRNA	Cd164	"CD164 molecule, sialomucin"	NA	NA	NM_031812	NA	NA	NA	NA_x000D_
RAT23890	5.92883	P	7.13169	P	0.434414	2.30195	down	0	RAT23890	0	mRNA	NA	NA	NA	NA	NA	NA	NA	NA	NA_x000D_
RAT12220	5.36402	P	2.53982	A	7.08222	7.08222	up	0	RAT12220	0	mRNA	Vsig8	V-set and immunoglobulin domain containing 8	NA	NA	NM_001105972	NA	NA	NA	NA_x000D_
RAT10486	3.94873	A	6.2647	P	0.200828	4.97939	down	0	RAT10486	0	mRNA	NA	NA	NA	NA	TC629062	NA	NA	NA	NA_x000D_
RAT17922	6.74635	P	5.38452	P	2.57012	2.57012	up	0	RAT17922	0	mRNA	Ddx10	DEAD (Asp-Glu-Ala-Asp) box polypeptide 10	NA	NA	NM_001106820	NA	NA	NA	NA_x000D_
RAT10706	5.34389	P	2.76842	A	5.96068	5.96068	up	0	RAT10706	0	mRNA	En2	engrailed homeobox 2	NA	NA	NM_001109214	NA	NA	NA	NA_x000D_
RAT09115	9.62612	P	8.42111	P	2.30538	2.30538	up	0	RAT09115	0	mRNA	Slc7a1	"solute carrier family 7 (cationic amino acid transporter, y+ system), member 1"	NA	NA	NM_013111	NA	NA	NA	NA_x000D_
RAT01109	5.6265	P	6.92782	P	0.405754	2.46455	down	0	RAT01109	0	mRNA	NA	NA	NA	NA	ENSRNOT00000055096	NA	NA	NA	NA_x000D_
RAT08346	10.2763	P	11.6999	P	0.372775	2.68258	down	0	RAT08346	0	mRNA	Stard6	StAR-related lipid transfer (START) domain containing 6	NA	NA	NM_001007627	NA	NA	NA	NA_x000D_
RAT21760	6.11691	P	4.90674	A	2.31364	2.31364	up	0	RAT21760	0	mRNA	Foxi2	forkhead box I2	NA	NA	ENSRNOT00000025569	NA	NA	NA	NA_x000D_
RAT05429	9.3787	P	11.0071	P	0.323452	3.09165	down	0	RAT05429	0	mRNA	Inpp4b	"inositol polyphosphate-4-phosphatase, type II"	NA	NA	NM_053917	NA	NA	NA	NA_x000D_
RAT26235	10.3841	P	8.88747	P	2.82187	2.82187	up	0	RAT26235	0	mRNA	Tmem27	transmembrane protein 27	NA	NA	NM_020976	NA	NA	NA	NA_x000D_
RAT01391	9.53104	P	11.7858	P	0.209531	4.77257	down	0	RAT01391	0	mRNA	Prkcdbp	"protein kinase C, delta binding protein"	NA	NA	NM_134449	NA	NA	NA	NA_x000D_
RAT21196	4.585	A	6.43319	P	0.277741	3.60048	down	0	RAT21196	0	mRNA	Grid1	"glutamate receptor, ionotropic, delta 1"	NA	NA	NM_024378	NA	NA	NA	NA_x000D_
RAT08381	6.13577	P	4.66707	A	2.76774	2.76774	up	0	RAT08381	0	mRNA	NA	NA	NA	NA	XM_227056	NA	NA	NA	NA_x000D_
RAT23813	5.55638	P	6.96475	P	0.376737	2.65437	down	0	RAT23813	0	mRNA	NA	NA	NA	NA	NA	NA	NA	NA	NA_x000D_
RAT21746	4.89531	A	5.96108	P	0.477715	2.0933	down	0	RAT21746	0	mRNA	Qser1	glutamine and serine rich 1	NA	NA	NM_001139493	NA	NA	NA	NA_x000D_
RAT09835	5.57314	P	2.58431	A	7.93832	7.93832	up	0	RAT09835	0	mRNA	Ate1	arginyltransferase 1	NA	NA	NM_001106300	NA	NA	NA	NA_x000D_
RAT13843	6.47091	P	5.06822	A	2.64394	2.64394	up	0	RAT13843	0	mRNA	Cyp11a1	"cytochrome P450, family 11, subfamily a, polypeptide 1"	NA	NA	NM_017286	NA	NA	NA	NA_x000D_
RAT03810	9.80715	P	11.2798	P	0.360313	2.77536	down	0	RAT03810	0	mRNA	Rsb66	Rsb-66 protein	NA	NA	NM_181694	NA	NA	NA	NA_x000D_
RAT14053	8.392	P	9.61044	P	0.429748	2.32695	down	0	RAT14053	0	mRNA	NA	NA	NA	NA	NA	NA	NA	NA	NA_x000D_
RAT14432	3.97034	A	7.17901	P	0.108167	9.245	down	0	RAT14432	0	mRNA	NA	NA	NA	NA	ENSRNOT00000011676	NA	NA	NA	NA_x000D_
RAT18015	4.35192	A	5.97602	P	0.324412	3.0825	down	0	RAT18015	0	mRNA	Tcp11l1	t-complex 11 like 1	NA	NA	NM_001109202	NA	NA	NA	NA_x000D_
RAT28232	9.23122	P	8.2103	P	2.02922	2.02922	up	0	RAT28232	0	mRNA	Galntl4	UDP-N-acetyl-alpha-D-galactosamine:polypeptide N-acetylgalactosaminyltransferase-like 4	NA	NA	NM_001079884	NA	NA	NA	NA_x000D_
RAT19986	6.39139	P	5.1571	A	2.35266	2.35266	up	0	RAT19986	0	mRNA	Tanc2	"tetratricopeptide repeat, ankyrin repeat and coiled-coil containing 2"	NA	NA	NM_001191653	NA	NA	NA	NA_x000D_
RAT03495	6.79352	P	5.52671	P	2.4063	2.4063	up	0	RAT03495	0	mRNA	LOC100174910	glutaredoxin-like protein	NA	NA	NM_001131003	NA	NA	NA	NA_x000D_
RAT13993	7.19003	P	6.1891	P	2.00129	2.00129	up	0	RAT13993	0	mRNA	NA	NA	NA	NA	NA	NA	NA	NA	NA_x000D_
RAT11148	5.78499	P	4.28146	A	2.83535	2.83535	up	0	RAT11148	0	mRNA	Tnfrsf14	"tumor necrosis factor receptor superfamily, member 14"	NA	NA	NM_001015034	NA	NA	NA	NA_x000D_
RAT23391	6.21294	P	7.44338	P	0.426186	2.3464	down	0	RAT23391	0	mRNA	NA	NA	NA	NA	ENSRNOT00000066893	NA	NA	NA	NA_x000D_
RAT04343	7.19907	P	8.31796	P	0.460446	2.17181	down	0	RAT04343	0	mRNA	Aqp7	aquaporin 7	NA	NA	NM_019157	NA	NA	NA	NA_x000D_
RAT10885	8.76459	P	7.50702	P	2.39092	2.39092	up	0	RAT10885	0	mRNA	Fam20b	"family with sequence similarity 20, member B"	NA	NA	NM_001107187	NA	NA	NA	NA_x000D_
RAT23100	4.22691	A	5.60102	P	0.385789	2.59209	down	0	RAT23100	0	mRNA	NA	NA	NA	NA	TC604434	NA	NA	NA	NA_x000D_
RAT05136	8.44617	P	9.69355	P	0.421211	2.37411	down	0	RAT05136	0	mRNA	NA	NA	NA	NA	XM_228527	NA	NA	NA	NA_x000D_
RAT30265	5.7689	P	7.08676	P	0.40113	2.49296	down	0	RAT30265	0	mRNA	RGD1563714	RGD1563714	NA	NA	NM_001126297	NA	NA	NA	NA_x000D_
RAT12404	7.19362	P	8.78875	P	0.330993	3.02121	down	0	RAT12404	0	mRNA	NA	NA	NA	NA	ENSRNOT00000038605	NA	NA	NA	NA_x000D_
RAT11715	6.30253	P	4.97369	A	2.51201	2.51201	up	0	RAT11715	0	mRNA	Mis18a	MIS18 kinetochore protein homolog A (S. pombe)	NA	NA	NM_001127523	NA	NA	NA	NA_x000D_
RAT03152	7.91647	P	8.95273	P	0.487587	2.05091	down	0	RAT03152	0	mRNA	Rsph10b	radial spoke head 10 homolog B (Chlamydomonas)	NA	NA	NM_001013867	NA	NA	NA	NA_x000D_
RAT15578	2.57014	A	6.10406	P	0.0863349	11.5828	down	0	RAT15578	0	mRNA	NA	NA	NA	NA	NA	NA	NA	NA	NA_x000D_
RAT24555	10.9451	P	12.8007	P	0.276318	3.61902	down	0	RAT24555	0	mRNA	RGD1563263	similar to RIKEN cDNA 1700029I15	NA	NA	NM_001109201	NA	NA	NA	NA_x000D_
RAT29969	6.03554	P	7.55472	P	0.348885	2.86628	down	0	RAT29969	0	mRNA	NA	NA	NA	NA	ENSRNOT00000059968	NA	NA	NA	NA_x000D_
RAT17669	5.16493	P	3.65847	A	2.84112	2.84112	up	0	RAT17669	0	mRNA	RGD1565119	similar to Mitochondrial carrier triple repeat 1	NA	NA	XM_001078261	NA	NA	NA	NA_x000D_
RAT13194	8.15678	P	6.87396	P	2.43314	2.43314	up	0	RAT13194	0	mRNA	NA	NA	NA	NA	ENSRNOT00000007474	NA	NA	NA	NA_x000D_
RAT13079	5.53432	P	3.30955	A	4.67437	4.67437	up	0	RAT13079	0	mRNA	LOC679630	"similar to eukaryotic translation initiation factor 4, gamma 1 isoform a"	NA	NA	XM_002727916	NA	NA	NA	NA_x000D_
RAT08298	6.54956	P	4.78586	A	3.39567	3.39567	up	0	RAT08298	0	mRNA	Mrpl15	mitochondrial ribosomal protein L15	NA	NA	NM_001106633	NA	NA	NA	NA_x000D_
RAT09935	7.37215	P	8.45271	P	0.472847	2.11485	down	0	RAT09935	0	mRNA	Zmynd15	"zinc finger, MYND-type containing 15"	NA	NA	NM_001105800	NA	NA	NA	NA_x000D_
RAT17696	11.0089	P	9.18521	P	3.53977	3.53977	up	0	RAT17696	0	mRNA	Wfdc6a	WAP four-disulfide core domain 6A	NA	NA	NM_001246283	NA	NA	NA	NA_x000D_
RAT01448	6.52911	P	7.71975	P	0.438108	2.28254	down	0	RAT01448	0	mRNA	Zfp385a	zinc finger protein 385A	NA	NA	NM_001135088	NA	NA	NA	NA_x000D_
RAT02055	11.0383	P	12.8162	P	0.291611	3.42922	down	0	RAT02055	0	mRNA	Hk1	hexokinase 1	NA	NA	NM_012734	NA	NA	NA	NA_x000D_
RAT27477	12.6386	P	11.5399	P	2.14158	2.14158	up	0	RAT27477	0	mRNA	Cldn23	claudin 23	NA	NA	NM_001033062	NA	NA	NA	NA_x000D_
RAT18039	5.14876	P	4.04992	A	2.14182	2.14182	up	0	RAT18039	0	mRNA	Krtap13-2	keratin associated protein 13-2	NA	NA	NM_001109325	NA	NA	NA	NA_x000D_
RAT24038	6.4646	P	4.91517	A	2.92703	2.92703	up	0	RAT24038	0	mRNA	Mocos	molybdenum cofactor sulfurase	NA	NA	NM_001108425	NA	NA	NA	NA_x000D_
RAT02598	11.7474	P	10.2524	P	2.81872	2.81872	up	0	RAT02598	0	mRNA	Sult5a1	"sulfotransferase family 5A, member 1"	NA	NA	NM_001106194	NA	NA	NA	NA_x000D_
RAT01379	7.14926	P	6.11346	P	2.05025	2.05025	up	0	RAT01379	0	mRNA	Tec	tec protein tyrosine kinase	NA	NA	NM_053432	NA	NA	NA	NA_x000D_
RAT18300	7.53906	P	9.22472	P	0.31086	3.21688	down	0	RAT18300	0	mRNA	LOC689740	similar to spermatogenesis associated glutamate (E)-rich protein 4d	NA	NA	XM_001071835	NA	NA	NA	NA_x000D_
RAT05556	5.75783	P	7.44646	P	0.310222	3.2235	down	0	RAT05556	0	mRNA	Rims1	regulating synaptic membrane exocytosis 1	NA	NA	NM_052829	NA	NA	NA	NA_x000D_
RAT21810	6.89888	P	5.50002	P	2.63694	2.63694	up	0	RAT21810	0	mRNA	NA	NA	NA	NA	ENSRNOT00000033372	NA	NA	NA	NA_x000D_
RAT14844	12.5313	P	13.6658	P	0.455482	2.19547	down	0	RAT14844	0	mRNA	NA	NA	NA	NA	NA	NA	NA	NA	NA_x000D_
RAT07458	9.56195	P	8.2466	P	2.48864	2.48864	up	0	RAT07458	0	mRNA	Tmem30b	transmembrane protein 30B	NA	NA	NM_001080380	NA	NA	NA	NA_x000D_
RAT03623	4.76466	A	6.41736	P	0.318044	3.14422	down	0	RAT03623	0	mRNA	Lpl	lipoprotein lipase	NA	NA	NM_012598	NA	NA	NA	NA_x000D_
RAT00654	7.09213	P	6.09114	P	2.00137	2.00137	up	0	RAT00654	0	mRNA	Wdr43	WD repeat domain 43	NA	NA	NM_001037791	NA	NA	NA	NA_x000D_
RAT25064	4.27052	A	5.39574	P	0.458433	2.18134	down	0	RAT25064	0	mRNA	Olr1459	olfactory receptor 1459	NA	NA	NM_001000770	NA	NA	NA	NA_x000D_
RAT04698	4.66539	A	6.4001	P	0.300467	3.32815	down	0	RAT04698	0	mRNA	Adam10	ADAM metallopeptidase domain 10	NA	NA	ENSRNOT00000021066	NA	NA	NA	NA_x000D_
RAT23679	4.63638	A	5.95637	P	0.400539	2.49664	down	0	RAT23679	0	mRNA	NA	NA	NA	NA	NA	NA	NA	NA	NA_x000D_
RAT04961	6.87875	P	5.75959	P	2.17219	2.17219	up	0	RAT04961	0	mRNA	Gpr56	G protein-coupled receptor 56	NA	NA	NM_152242	NA	NA	NA	NA_x000D_
RAT17079	11.4588	P	12.5247	P	0.477672	2.09349	down	0	RAT17079	0	mRNA	NA	NA	NA	NA	NA	NA	NA	NA	NA_x000D_
RAT18579	9.74842	P	8.07839	P	3.18222	3.18222	up	0	RAT18579	0	mRNA	NA	NA	NA	NA	NA	NA	NA	NA	NA_x000D_
RAT25793	8.58989	P	7.41236	P	2.26188	2.26188	up	0	RAT25793	0	mRNA	LOC681367	hypothetical protein LOC681367	NA	NA	XM_001061427	NA	NA	NA	NA_x000D_
RAT02271	8.58683	P	9.75249	P	0.445762	2.24335	down	0	RAT02271	0	mRNA	Klf10	Kruppel-like factor 10	NA	NA	NM_031135	NA	NA	NA	NA_x000D_
RAT22821	6.58545	P	8.09291	P	0.351729	2.8431	down	0	RAT22821	0	mRNA	NA	NA	NA	NA	NA	NA	NA	NA	NA_x000D_
RAT11136	5.2063	P	7.38372	P	0.221071	4.52344	down	0	RAT11136	0	mRNA	Hydin	hydrocephalus inducing	NA	NA	ENSRNOT00000059147	NA	NA	NA	NA_x000D_
RAT12239	6.17061	P	4.76137	A	2.65597	2.65597	up	0	RAT12239	0	mRNA	LOC680370	hypothetical protein LOC680370	NA	NA	NM_001109402	NA	NA	NA	NA_x000D_
RAT07016	6.65659	P	7.69849	P	0.485686	2.05894	down	0	RAT07016	0	mRNA	Rasl11a	RAS-like family 11 member A	NA	NA	NM_001002829	NA	NA	NA	NA_x000D_
RAT04876	7.01213	P	8.93963	P	0.262884	3.80396	down	0	RAT04876	0	mRNA	Il18	interleukin 18	NA	NA	NM_019165	NA	NA	NA	NA_x000D_
RAT15409	9.67782	P	10.7628	P	0.471414	2.12128	down	0	RAT15409	0	mRNA	LOC500594	LRRGT00162	NA	NA	NM_001047958	NA	NA	NA	NA_x000D_
RAT27602	7.78949	P	8.99609	P	0.433289	2.30793	down	0	RAT27602	0	mRNA	Rfk	riboflavin kinase	NA	NA	NM_001014106	NA	NA	NA	NA_x000D_
RAT21340	6.09896	P	7.16654	P	0.477118	2.09592	down	0	RAT21340	0	mRNA	NA	NA	NA	NA	ENSRNOT00000061042	NA	NA	NA	NA_x000D_
RAT06334	5.7755	P	4.74886	A	2.03727	2.03727	up	0	RAT06334	0	mRNA	Tmem70	transmembrane protein 70	NA	NA	NM_001109258	NA	NA	NA	NA_x000D_
RAT02977	7.14684	P	5.47918	P	3.17699	3.17699	up	0	RAT02977	0	mRNA	Efhd1	"EF-hand domain family, member D1"	NA	NA	NM_001109310	NA	NA	NA	NA_x000D_
RAT06275	6.71932	P	5.42666	P	2.44979	2.44979	up	0	RAT06275	0	mRNA	Gale	UDP-galactose-4-epimerase	NA	NA	NM_080783	NA	NA	NA	NA_x000D_
RAT10083	5.86838	P	7.22541	P	0.390384	2.56158	down	0	RAT10083	0	mRNA	NA	NA	NA	NA	ENSRNOT00000037998	NA	NA	NA	NA_x000D_
RAT25028	6.59113	P	2.57982	A	16.126	16.126	up	0	RAT25028	0	mRNA	B3galt6	"UDP-Gal:betaGal beta 1,3-galactosyltransferase, polypeptide 6"	NA	NA	NM_001106699	NA	NA	NA	NA_x000D_
RAT19250	9.40054	P	10.4461	P	0.484469	2.06412	down	0	RAT19250	0	mRNA	Ptk7	PTK7 protein tyrosine kinase 7	NA	NA	NM_001106889	NA	NA	NA	NA_x000D_
RAT14883	2.42878	A	5.20477	P	0.145997	6.84945	down	0	RAT14883	0	mRNA	Olr255	olfactory receptor 255	NA	NA	NM_001000947	NA	NA	NA	NA_x000D_
RAT07405	4.41038	A	6.73281	P	0.199931	5.00173	down	0	RAT07405	0	mRNA	Hist1h1t	"histone cluster 1, H1t"	NA	NA	NM_012579	NA	NA	NA	NA_x000D_
RAT17592	7.16642	P	6.03799	P	2.1862	2.1862	up	0	RAT17592	0	mRNA	Pde9a	phosphodiesterase 9A	NA	NA	NM_138543	NA	NA	NA	NA_x000D_
RAT02288	7.85308	P	9.86951	P	0.247169	4.04582	down	0	RAT02288	0	mRNA	Pgcp	plasma glutamate carboxypeptidase	NA	NA	NM_031640	NA	NA	NA	NA_x000D_
RAT14749	11.006	P	12.1467	P	0.453533	2.20491	down	0	RAT14749	0	mRNA	NA	NA	NA	NA	NA	NA	NA	NA	NA_x000D_
RAT04428	6.06734	P	7.10544	P	0.48697	2.05352	down	0	RAT04428	0	mRNA	NA	NA	NA	NA	ENSRNOT00000035265	NA	NA	NA	NA_x000D_
RAT04305	6.93482	P	5.73204	P	2.30183	2.30183	up	0	RAT04305	0	mRNA	Hpdl	4-hydroxyphenylpyruvate dioxygenase-like	NA	NA	NM_001014068	NA	NA	NA	NA_x000D_
RAT23272	4.13894	A	5.25165	P	0.462422	2.16253	down	0	RAT23272	0	mRNA	NA	NA	NA	NA	NA	NA	NA	NA	NA_x000D_
RAT27997	3.58311	A	6.15135	P	0.168609	5.93087	down	0	RAT27997	0	mRNA	LOC689800	similar to osteoclast inhibitory lectin	NA	NA	ENSRNOT00000049620	NA	NA	NA	NA_x000D_
RAT13985	3.94501	A	6.52089	P	0.167719	5.96234	down	0	RAT13985	0	mRNA	RGD1561667	similar to putative protein kinase	NA	NA	XM_217999	NA	NA	NA	NA_x000D_
RAT15460	7.15817	P	6.04008	P	2.1706	2.1706	up	0	RAT15460	0	mRNA	NA	NA	NA	NA	ENSRNOT00000061428	NA	NA	NA	NA_x000D_
RAT29157	9.09061	P	10.0977	P	0.497555	2.00983	down	0	RAT29157	0	mRNA	RGD1563034	similar to ETS domain transcription factor ERF (Ets2 repressor factor)	NA	NA	XM_218458	NA	NA	NA	NA_x000D_
RAT05621	5.54653	P	4.37678	A	2.24973	2.24973	up	0	RAT05621	0	mRNA	Ggt1	gamma-glutamyltransferase 1	NA	NA	NM_053840	NA	NA	NA	NA_x000D_
RAT14535	5.96157	P	7.48288	P	0.34837	2.87051	down	0	RAT14535	0	mRNA	LOC688924	hypothetical protein LOC688924	NA	NA	NM_001109519	NA	NA	NA	NA_x000D_
RAT21935	11.6711	P	12.8859	P	0.430849	2.321	down	0	RAT21935	0	mRNA	Tcp11	t-complex protein 11	NA	NA	NM_001007695	NA	NA	NA	NA_x000D_
RAT10614	7.07813	P	3.11939	A	15.5488	15.5488	up	0	RAT10614	0	mRNA	Mrpl35	mitochondrial ribosomal protein L35	NA	NA	NM_001106596	NA	NA	NA	NA_x000D_
RAT09572	7.89043	P	9.21824	P	0.398372	2.51022	down	0	RAT09572	0	mRNA	S100z	S100 calcium binding protein Z	NA	NA	NM_001191701	NA	NA	NA	NA_x000D_
RAT05122	8.76049	P	7.07947	P	3.20656	3.20656	up	0	RAT05122	0	mRNA	Hpd	4-hydroxyphenylpyruvate dioxygenase	NA	NA	NM_017233	NA	NA	NA	NA_x000D_
RAT21666	4.2943	A	5.53385	P	0.423505	2.36125	down	0	RAT21666	0	mRNA	NA	NA	NA	NA	NA	NA	NA	NA	NA_x000D_
RAT27722	7.57059	P	9.27145	P	0.307601	3.25096	down	0	RAT27722	0	mRNA	Hsf2bp	heat shock transcription factor 2 binding protein	NA	NA	NM_001127683	NA	NA	NA	NA_x000D_
RAT21243	7.94863	P	6.90644	P	2.05935	2.05935	up	0	RAT21243	0	mRNA	NA	NA	NA	NA	ENSRNOT00000019301	NA	NA	NA	NA_x000D_
RAT25942	8.22134	P	10.8068	P	0.166611	6.00201	down	0	RAT25942	0	mRNA	Slit3	slit homolog 3 (Drosophila)	NA	NA	NM_031321	NA	NA	NA	NA_x000D_
RAT24022	5.02237	A	6.27731	P	0.419011	2.38657	down	0	RAT24022	0	mRNA	NA	NA	NA	NA	NA	NA	NA	NA	NA_x000D_
RAT18381	7.80639	P	9.09336	P	0.409811	2.44015	down	0	RAT18381	0	mRNA	Setl1	SET translocation-like 1	NA	NA	NM_194353	NA	NA	NA	NA_x000D_
RAT17411	5.58509	P	2.58494	A	8.0008	8.0008	up	0	RAT17411	0	mRNA	Olr153	olfactory receptor 153	NA	NA	NM_001000167	NA	NA	NA	NA_x000D_
RAT09308	5.46238	P	3.76798	A	3.23642	3.23642	up	0	RAT09308	0	mRNA	Tspan6	tetraspanin 6	NA	NA	NM_001100672	NA	NA	NA	NA_x000D_
RAT26639	5.2125	P	6.41339	P	0.435007	2.29881	down	0	RAT26639	0	mRNA	LOC690626	hypothetical protein LOC690626	NA	NA	XM_001075006	NA	NA	NA	NA_x000D_
RAT04521	13.9979	P	11.88	P	4.34037	4.34037	up	0	RAT04521	0	mRNA	Serpina1f	"serine (or cysteine) peptidase inhibitor, clade A, member 1F"	NA	NA	NM_001108054	NA	NA	NA	NA_x000D_
RAT05373	7.2769	P	8.85831	P	0.334155	2.99262	down	0	RAT05373	0	mRNA	Akap12	A kinase (PRKA) anchor protein 12	NA	NA	NM_057103	NA	NA	NA	NA_x000D_
RAT26848	4.49566	A	6.78854	P	0.204067	4.90036	down	0	RAT26848	0	mRNA	NA	NA	NA	NA	NA	NA	NA	NA	NA_x000D_
RAT01390	5.74678	P	7.23486	P	0.356486	2.80516	down	0	RAT01390	0	mRNA	RGD1563091	similar to OEF2	NA	NA	XM_575365	NA	NA	NA	NA_x000D_
RAT00800	9.52851	P	8.36426	P	2.24116	2.24116	up	0	RAT00800	0	mRNA	Smarca5	"SWI/SNF related, matrix associated, actin dependent regulator of chromatin, subfamily a, member 5"	NA	NA	NM_001107419	NA	NA	NA	NA_x000D_
RAT10428	7.85032	P	6.81427	P	2.05061	2.05061	up	0	RAT10428	0	mRNA	Foxn3	forkhead box N3	NA	NA	NM_001108047	NA	NA	NA	NA_x000D_
RAT00110	6.6542	P	5.53204	P	2.17671	2.17671	up	0	RAT00110	0	mRNA	Lsm2	"LSM2 homolog, U6 small nuclear RNA associated (S. cerevisiae)"	NA	NA	NM_001165922	NA	NA	NA	NA_x000D_
RAT14362	12.1626	P	13.2091	P	0.484147	2.06549	down	0	RAT14362	0	mRNA	NA	NA	NA	NA	ENSRNOT00000060749	NA	NA	NA	NA_x000D_
RAT07216	5.74401	P	7.35227	P	0.327995	3.04883	down	0	RAT07216	0	mRNA	LOC501349	hypothetical LOC501349	NA	NA	XM_001073636	NA	NA	NA	NA_x000D_
RAT06036	6.59033	P	8.09932	P	0.351359	2.84609	down	0	RAT06036	0	mRNA	Prp2l1	proline rich protein 2-like 1	NA	NA	ENSRNOT00000004642	NA	NA	NA	NA_x000D_
RAT26889	6.18926	P	7.54116	P	0.391774	2.55249	down	0	RAT26889	0	mRNA	NA	NA	NA	NA	NA	NA	NA	NA	NA_x000D_
RAT09666	5.38129	P	4.1602	A	2.33122	2.33122	up	0	RAT09666	0	mRNA	RGD1564676	similar to NF-X1 type zinc finger containing protein (2J511)	NA	NA	XM_344589	NA	NA	NA	NA_x000D_
RAT27185	5.35584	P	6.39303	P	0.487279	2.05221	down	0	RAT27185	0	mRNA	RT1-N1	"RT1 class Ib, locus N1"	NA	NA	NM_012646	NA	NA	NA	NA_x000D_
RAT02047	5.12688	P	2.40655	A	6.5902	6.5902	up	0	RAT02047	0	mRNA	Spink3	"serine peptidase inhibitor, Kazal type 3"	NA	NA	M35299	NA	NA	NA	NA_x000D_
RAT08465	5.94752	P	4.77548	A	2.2533	2.2533	up	0	RAT08465	0	mRNA	Homez	homeobox and leucine zipper encoding	NA	NA	NM_152849	NA	NA	NA	NA_x000D_
RAT08571	6.11159	P	7.7912	P	0.312168	3.20341	down	0	RAT08571	0	mRNA	Ctnna3	"catenin (cadherin associated protein), alpha 3"	NA	NA	XM_342133	NA	NA	NA	NA_x000D_
RAT20129	6.81187	P	8.13129	P	0.400696	2.49565	down	0	RAT20129	0	mRNA	LOC691286	similar to RIKEN cDNA 4930504O13	NA	NA	NM_001109634	NA	NA	NA	NA_x000D_
RAT01884	7.36607	P	6.33197	P	2.04783	2.04783	up	0	RAT01884	0	mRNA	Slc45a3	"solute carrier family 45, member 3"	NA	NA	NM_001135868	NA	NA	NA	NA_x000D_
RAT19404	5.33689	P	6.35622	P	0.493345	2.02698	down	0	RAT19404	0	mRNA	LOC685368	similar to Ral guanine nucleotide dissociation stimulator (RalGEF) (RalGDS)	NA	NA	XM_001063509	NA	NA	NA	NA_x000D_
RAT05349	8.07476	P	5.70387	P	5.1726	5.1726	up	0	RAT05349	0	mRNA	Lppr4	lipid phosphate phosphatase-related protein type 4	NA	NA	NM_001001508	NA	NA	NA	NA_x000D_
RAT16744	5.01936	A	7.02118	P	0.249684	4.00506	down	0	RAT16744	0	mRNA	Rlbp1	retinaldehyde binding protein 1	NA	NA	NM_001106274	NA	NA	NA	NA_x000D_
RAT25302	6.78411	P	8.16193	P	0.384799	2.59876	down	0	RAT25302	0	mRNA	NA	NA	NA	NA	NA	NA	NA	NA	NA_x000D_
RAT09316	6.73719	P	8.92006	P	0.220236	4.54057	down	0	RAT09316	0	mRNA	Gfra4	GDNF family receptor alpha 4	NA	NA	NM_023967	NA	NA	NA	NA_x000D_
RAT02542	9.84864	P	7.96157	P	3.69883	3.69883	up	0	RAT02542	0	mRNA	Smpx	"small muscle protein, X-linked"	NA	NA	NM_053395	NA	NA	NA	NA_x000D_
RAT01751	6.93876	P	7.99121	P	0.482151	2.07404	down	0	RAT01751	0	mRNA	NA	NA	NA	NA	TC636720	NA	NA	NA	NA_x000D_
RAT19120	6.22124	P	4.61879	A	3.03657	3.03657	up	0	RAT19120	0	mRNA	LOC502894	hypothetical protein LOC502894	NA	NA	NM_001025064	NA	NA	NA	NA_x000D_
RAT20285	6.36808	P	2.58294	A	13.7861	13.7861	up	0	RAT20285	0	mRNA	RGD1566036	similar to RIKEN cDNA 2310008H04	NA	NA	NM_001100988	NA	NA	NA	NA_x000D_
RAT24796	4.02501	A	5.15233	P	0.457766	2.18452	down	0	RAT24796	0	mRNA	NA	NA	NA	NA	NA	NA	NA	NA	NA_x000D_
RAT09179	9.21192	P	7.73894	P	2.77595	2.77595	up	0	RAT09179	0	mRNA	Snrpd1	small nuclear ribonucleoprotein D1	NA	NA	NM_001106163	NA	NA	NA	NA_x000D_
RAT11890	3.62889	A	6.05021	P	0.186685	5.35662	down	0	RAT11890	0	mRNA	Cyp2b15	"cytochrome P450, family 2, subfamily b, polypeptide 15"	NA	NA	ENSRNOT00000002054	NA	NA	NA	NA_x000D_
RAT07365	5.7982	P	6.84403	P	0.484366	2.06455	down	0	RAT07365	0	mRNA	Slc44a2	"solute carrier family 44, member 2"	NA	NA	NM_001134715	NA	NA	NA	NA_x000D_
RAT03946	7.40105	P	6.23713	P	2.24065	2.24065	up	0	RAT03946	0	mRNA	Lace1	lactation elevated 1	NA	NA	NM_001037656	NA	NA	NA	NA_x000D_
RAT22598	5.4625	P	4.38903	A	2.10449	2.10449	up	0	RAT22598	0	mRNA	Rgs11	regulator of G-protein signaling 11	NA	NA	NM_019338	NA	NA	NA	NA_x000D_
RAT25699	5.60384	P	4.43167	A	2.2535	2.2535	up	0	RAT25699	0	mRNA	Gpr34	G protein-coupled receptor 34	NA	NA	NM_001024925	NA	NA	NA	NA_x000D_
RAT15494	6.4823	P	8.55966	P	0.236949	4.22032	down	0	RAT15494	0	mRNA	Ang1	"angiogenin, ribonuclease A family, member 1"	NA	NA	NM_001006992	NA	NA	NA	NA_x000D_
RAT09539	2.40677	A	5.63896	P	0.106418	9.39693	down	0	RAT09539	0	mRNA	NA	NA	NA	NA	ENSRNOT00000036735	NA	NA	NA	NA_x000D_
RAT17087	2.40887	A	5.07762	P	0.157263	6.35878	down	0	RAT17087	0	mRNA	Cyb561d1	cytochrome b-561 domain containing 1	NA	NA	NM_001108562	NA	NA	NA	NA_x000D_
RAT08209	6.3291	P	4.59917	A	3.3171	3.3171	up	0	RAT08209	0	mRNA	Faslg	"Fas ligand (TNF superfamily, member 6)"	NA	NA	NM_012908	NA	NA	NA	NA_x000D_
RAT09483	5.27054	P	6.92827	P	0.316937	3.1552	down	0	RAT09483	0	mRNA	NA	NA	NA	NA	BF557905	NA	NA	NA	NA_x000D_
RAT22515	6.87625	P	8.08344	P	0.433111	2.30888	down	0	RAT22515	0	mRNA	NA	NA	NA	NA	ENSRNOT00000068451	NA	NA	NA	NA_x000D_
RAT24666	6.74314	P	9.3122	P	0.168514	5.93422	down	0	RAT24666	0	mRNA	LOC304239	similar to RalA binding protein 1	NA	NA	ENSRNOT00000001187	NA	NA	NA	NA_x000D_
RAT29265	7.79224	P	6.49628	P	2.4554	2.4554	up	0	RAT29265	0	mRNA	NA	NA	NA	NA	NA	NA	NA	NA	NA_x000D_
RAT11635	4.21122	A	6.29309	P	0.236208	4.23355	down	0	RAT11635	0	mRNA	NA	NA	NA	NA	NA	NA	NA	NA	NA_x000D_
RAT24063	9.39544	P	10.9777	P	0.333961	2.99436	down	0	RAT24063	0	mRNA	Coa5	cytochrome C oxidase assembly factor 5	NA	NA	NM_001195488	NA	NA	NA	NA_x000D_
RAT19039	6.12947	P	9.64841	P	0.0872356	11.4632	down	0	RAT19039	0	mRNA	Pkhd1l1	polycystic kidney and hepatic disease 1-like 1	NA	NA	NM_001034931	NA	NA	NA	NA_x000D_
RAT09108	5.84391	P	7.06052	P	0.430291	2.32401	down	0	RAT09108	0	mRNA	Ccdc164	coiled-coil domain containing 164	NA	NA	NM_001007009	NA	NA	NA	NA_x000D_
RAT24652	5.70693	P	2.43562	A	9.65524	9.65524	up	0	RAT24652	0	mRNA	NA	NA	NA	NA	NA	NA	NA	NA	NA_x000D_
RAT22547	9.72681	P	8.23989	P	2.8029	2.8029	up	0	RAT22547	0	mRNA	NA	NA	NA	NA	XM_224421	NA	NA	NA	NA_x000D_
RAT27784	7.44704	P	8.88166	P	0.369943	2.70312	down	0	RAT27784	0	mRNA	NA	NA	NA	NA	NA	NA	NA	NA	NA_x000D_
RAT12117	12.5284	P	10.9193	P	3.05067	3.05067	up	0	RAT12117	0	mRNA	Gsta5	glutathione S-transferase Yc2 subunit	NA	NA	NM_001159739	NA	NA	NA	NA_x000D_
RAT25296	9.30732	P	8.19391	P	2.16355	2.16355	up	0	RAT25296	0	mRNA	Slc17a9	"solute carrier family 17, member 9"	NA	NA	NM_001108613	NA	NA	NA	NA_x000D_
RAT11599	2.5462	A	5.60329	P	0.12015	8.32295	down	0	RAT11599	0	mRNA	Ryr2	"ryanodine receptor 2, cardiac"	NA	NA	NM_032078	NA	NA	NA	NA_x000D_
RAT12522	5.0403	A	7.52172	P	0.179069	5.58445	down	0	RAT12522	0	mRNA	LOC690784	hypothetical protein LOC690784	NA	NA	NM_001044299	NA	NA	NA	NA_x000D_
RAT11257	5.25614	P	2.58859	A	6.35347	6.35347	up	0	RAT11257	0	mRNA	Nckap1l	NCK associated protein 1 like	NA	NA	NM_001108119	NA	NA	NA	NA_x000D_
RAT08533	7.02261	P	5.91367	P	2.15687	2.15687	up	0	RAT08533	0	mRNA	Traf6	Tnf receptor-associated factor 6	NA	NA	NM_001107754	NA	NA	NA	NA_x000D_
RAT11736	4.2381	A	5.25946	P	0.492651	2.02984	down	0	RAT11736	0	mRNA	NA	NA	NA	NA	NA	NA	NA	NA	NA_x000D_
RAT17574	4.86667	A	6.31423	P	0.36664	2.72747	down	0	RAT17574	0	mRNA	LOC685300	hypothetical protein LOC685300	NA	NA	CK471043	NA	NA	NA	NA_x000D_
RAT08411	5.50351	P	4.50155	A	2.00271	2.00271	up	0	RAT08411	0	mRNA	Dhdh	dihydrodiol dehydrogenase (dimeric)	NA	NA	ENSRNOT00000028334	NA	NA	NA	NA_x000D_
RAT17816	9.30653	P	10.4839	P	0.442159	2.26163	down	0	RAT17816	0	mRNA	NA	NA	NA	NA	NA	NA	NA	NA	NA_x000D_
RAT01491	9.66165	P	8.41434	P	2.374	2.374	up	0	RAT01491	0	mRNA	Lrrc8e	"leucine rich repeat containing 8 family, member E"	NA	NA	NM_001034139	NA	NA	NA	NA_x000D_
RAT13144	7.38855	P	9.10353	P	0.304607	3.28292	down	0	RAT13144	0	mRNA	Tnxa-ps1	"tenascin XA, pseudogene 1"	NA	NA	NR_024118	NA	NA	NA	NA_x000D_
RAT14047	4.70909	A	7.05457	P	0.196762	5.08228	down	0	RAT14047	0	mRNA	LOC685184	"similar to protein expressed in prostate, ovary, testis, and placenta 8 isoform 2"	NA	NA	XM_001062722	NA	NA	NA	NA_x000D_
RAT07616	5.69351	P	4.53895	A	2.22617	2.22617	up	0	RAT07616	0	mRNA	Lphn2	latrophilin 2	NA	NA	NM_134408	NA	NA	NA	NA_x000D_
RAT02078	4.73592	A	6.97375	P	0.212006	4.71685	down	0	RAT02078	0	mRNA	Atf3	activating transcription factor 3	NA	NA	NM_012912	NA	NA	NA	NA_x000D_
RAT27571	7.03397	P	9.1094	P	0.237266	4.21469	down	0	RAT27571	0	mRNA	Nov	nephroblastoma overexpressed gene	NA	NA	NM_030868	NA	NA	NA	NA_x000D_
RAT29436	11.5709	P	13.2956	P	0.302556	3.30518	down	0	RAT29436	0	mRNA	LOC100271845	hypothetical protein LOC100271845	NA	NA	NM_001145762	NA	NA	NA	NA_x000D_
RAT01597	8.14104	P	9.97678	P	0.280149	3.56953	down	0	RAT01597	0	mRNA	Htra1	HtrA serine peptidase 1	NA	NA	NM_031721	NA	NA	NA	NA_x000D_
RAT15301	6.73591	P	8.1727	P	0.369387	2.70719	down	0	RAT15301	0	mRNA	Kank1	KN motif and ankyrin repeat domains 1	NA	NA	NM_001037197	NA	NA	NA	NA_x000D_
RAT25695	5.61422	P	3.2169	A	5.26826	5.26826	up	0	RAT25695	0	mRNA	NA	NA	NA	NA	ENSRNOT00000051350	NA	NA	NA	NA_x000D_
RAT03721	13.4377	P	12.0455	P	2.62472	2.62472	up	0	RAT03721	0	mRNA	Alas1	"aminolevulinate, delta-, synthase 1"	NA	NA	NM_024484	NA	NA	NA	NA_x000D_
RAT26681	7.93419	P	6.73256	P	2.29999	2.29999	up	0	RAT26681	0	mRNA	Erh	enhancer of rudimentary homolog (Drosophila)	NA	NA	NM_001109442	NA	NA	NA	NA_x000D_
RAT09190	2.5491	A	5.86582	P	0.100362	9.96396	down	0	RAT09190	0	mRNA	Ret	ret proto-oncogene	NA	NA	NM_012643	NA	NA	NA	NA_x000D_
RAT22832	7.03993	P	5.99967	P	2.05661	2.05661	up	0	RAT22832	0	mRNA	RGD1584021	similar to histone Hist2h3c1	NA	NA	XR_006811	NA	NA	NA	NA_x000D_
RAT13007	5.76329	P	7.67121	P	0.266477	3.75267	down	0	RAT13007	0	mRNA	NA	NA	NA	NA	ENSRNOT00000013636	NA	NA	NA	NA_x000D_
RAT27706	6.28264	P	7.83436	P	0.341105	2.93165	down	0	RAT27706	0	mRNA	Dcbld2	"discoidin, CUB and LCCL domain containing 2"	NA	NA	NM_130419	NA	NA	NA	NA_x000D_
RAT10923	5.47432	P	2.50632	A	7.82449	7.82449	up	0	RAT10923	0	mRNA	Cdcp1	CUB domain containing protein 1	NA	NA	NM_001106869	NA	NA	NA	NA_x000D_
RAT27299	4.04278	A	5.38237	P	0.395132	2.5308	down	0	RAT27299	0	mRNA	NA	NA	NA	NA	ENSRNOT00000061377	NA	NA	NA	NA_x000D_
RAT30187	11.2836	P	10.161	P	2.1775	2.1775	up	0	RAT30187	0	mRNA	RGD1564906	similar to Glutathione S-transferase 8 (GST 8-8) (Chain 8) (GST class-alpha)	NA	NA	ENSRNOT00000000233	NA	NA	NA	NA_x000D_
RAT25922	5.32201	P	4.24113	A	2.11532	2.11532	up	0	RAT25922	0	mRNA	Elmod2	ELMO/CED-12 domain containing 2	NA	NA	NM_001109506	NA	NA	NA	NA_x000D_
RAT20534	9.36384	P	7.89215	P	2.77347	2.77347	up	0	RAT20534	0	mRNA	Hacl1	2-hydroxyacyl-CoA lyase 1	NA	NA	NM_053493	NA	NA	NA	NA_x000D_
RAT22885	11.9438	P	13.4577	P	0.350167	2.85578	down	0	RAT22885	0	mRNA	Spem1	spermatid maturation 1	NA	NA	NM_001109653	NA	NA	NA	NA_x000D_
RAT18109	7.10212	P	4.9627	A	4.40584	4.40584	up	0	RAT18109	0	mRNA	NA	NA	NA	NA	NA	NA	NA	NA	NA_x000D_
RAT28138	9.59053	P	10.6525	P	0.478994	2.08771	down	0	RAT28138	0	mRNA	LOC690206	hypothetical protein LOC690206	NA	NA	NM_001109567	NA	NA	NA	NA_x000D_
RAT18515	3.51553	A	5.47154	P	0.257741	3.87986	down	0	RAT18515	0	mRNA	Mn1	meningioma 1	NA	NA	NM_001191928	NA	NA	NA	NA_x000D_
RAT26813	3.60769	A	5.37943	P	0.292854	3.41467	down	0	RAT26813	0	mRNA	NA	NA	NA	NA	NA	NA	NA	NA	NA_x000D_
RAT06840	5.79813	P	2.59662	A	9.19918	9.19918	up	0	RAT06840	0	mRNA	Chrna3	"cholinergic receptor, nicotinic, alpha 3"	NA	NA	NM_052805	NA	NA	NA	NA_x000D_
RAT09259	8.71096	P	10.9312	P	0.214608	4.65965	down	0	RAT09259	0	mRNA	Ifitm3	interferon induced transmembrane protein 3	NA	NA	NM_001136124	NA	NA	NA	NA_x000D_
RAT28352	6.80971	P	4.91346	A	3.72245	3.72245	up	0	RAT28352	0	mRNA	NA	NA	NA	NA	NA	NA	NA	NA	NA_x000D_
RAT10653	9.43598	P	7.93094	P	2.83832	2.83832	up	0	RAT10653	0	mRNA	Dcdc2	doublecortin domain containing 2	NA	NA	NM_001106110	NA	NA	NA	NA_x000D_
RAT29134	9.12733	P	10.2883	P	0.447202	2.23613	down	0	RAT29134	0	mRNA	Traf4af1	TRAF4 associated factor 1	NA	NA	NM_001004264	NA	NA	NA	NA_x000D_
RAT12951	3.62542	A	6.36175	P	0.150066	6.66371	down	0	RAT12951	0	mRNA	Accn4	"amiloride-sensitive cation channel 4, pituitary"	NA	NA	NM_022234	NA	NA	NA	NA_x000D_
RAT26070	6.16503	P	7.86293	P	0.308235	3.24428	down	0	RAT26070	0	mRNA	MGC116197	similar to RIKEN cDNA 1700001E04	NA	NA	NM_001025755	NA	NA	NA	NA_x000D_
RAT06373	5.02525	A	7.86374	P	0.139807	7.15272	down	0	RAT06373	0	mRNA	Aldh1a3	"aldehyde dehydrogenase 1 family, member A3"	NA	NA	NM_153300	NA	NA	NA	NA_x000D_
RAT09772	6.36009	P	7.89656	P	0.344728	2.90084	down	0	RAT09772	0	mRNA	NA	NA	NA	NA	XM_344727	NA	NA	NA	NA_x000D_
RAT02478	5.86113	P	7.46231	P	0.329608	3.03391	down	0	RAT02478	0	mRNA	Zdhhc2	"zinc finger, DHHC-type containing 2"	NA	NA	NM_145096	NA	NA	NA	NA_x000D_
RAT07044	7.41779	P	6.38542	P	2.04538	2.04538	up	0	RAT07044	0	mRNA	Camkk1	"calcium/calmodulin-dependent protein kinase kinase 1, alpha"	NA	NA	NM_031662	NA	NA	NA	NA_x000D_
RAT26383	6.37237	P	3.88796	A	5.59605	5.59605	up	0	RAT26383	0	mRNA	Dand5	"DAN domain family, member 5"	NA	NA	ENSRNOT00000044133	NA	NA	NA	NA_x000D_
RAT28725	7.03117	P	8.48132	P	0.365983	2.73236	down	0	RAT28725	0	mRNA	Fst	follistatin	NA	NA	NM_012561	NA	NA	NA	NA_x000D_
RAT12551	5.99236	P	4.62658	A	2.57716	2.57716	up	0	RAT12551	0	mRNA	Entpd7	ectonucleoside triphosphate diphosphohydrolase 7	NA	NA	NM_001107595	NA	NA	NA	NA_x000D_
RAT19865	5.83225	P	4.21784	A	3.06186	3.06186	up	0	RAT19865	0	mRNA	Six2	SIX homeobox 2	NA	NA	NM_001191908	NA	NA	NA	NA_x000D_
RAT17481	12.4028	P	13.4414	P	0.486794	2.05426	down	0	RAT17481	0	mRNA	LOC100364218	hypothetical protein LOC100364218	NA	NA	XM_002725941	NA	NA	NA	NA_x000D_
RAT18912	10.0032	P	8.48201	P	2.87024	2.87024	up	0	RAT18912	0	mRNA	Fam89a	"family with sequence similarity 89, member A"	NA	NA	NM_001011711	NA	NA	NA	NA_x000D_
RAT29696	5.21378	P	6.75414	P	0.343798	2.90868	down	0	RAT29696	0	mRNA	NA	NA	NA	NA	ENSRNOT00000050943	NA	NA	NA	NA_x000D_
RAT05825	4.65497	A	6.89922	P	0.211064	4.73791	down	0	RAT05825	0	mRNA	Spon1	"spondin 1, extracellular matrix protein"	NA	NA	NM_172067	NA	NA	NA	NA_x000D_
RAT26814	8.00762	P	9.07675	P	0.476604	2.09818	down	0	RAT26814	0	mRNA	Sumo1	SMT3 suppressor of mif two 3 homolog 1 (S. cerevisiae)	NA	NA	NM_001009672	NA	NA	NA	NA_x000D_
RAT10693	5.63307	P	4.08135	A	2.93166	2.93166	up	0	RAT10693	0	mRNA	Zfyve16	"zinc finger, FYVE domain containing 16"	NA	NA	NM_001191958	NA	NA	NA	NA_x000D_
RAT22100	7.1546	P	5.99405	P	2.23542	2.23542	up	0	RAT22100	0	mRNA	NA	NA	NA	NA	ENSRNOT00000058241	NA	NA	NA	NA_x000D_
RAT11847	5.67274	P	3.95409	A	3.2913	3.2913	up	0	RAT11847	0	mRNA	RGD1565859	RGD1565859	NA	NA	XM_001063482	NA	NA	NA	NA_x000D_
RAT15935	5.26039	P	6.68309	P	0.373013	2.68088	down	0	RAT15935	0	mRNA	Paqr9	progestin and adipoQ receptor family member IX	NA	NA	ENSRNOT00000049729	NA	NA	NA	NA_x000D_
RAT08184	5.30143	P	6.52039	P	0.429592	2.32779	down	0	RAT08184	0	mRNA	Nphp1	nephronophthisis 1 (juvenile) homolog (human)	NA	NA	NM_001106506	NA	NA	NA	NA_x000D_
RAT04274	6.49644	P	5.29141	P	2.30541	2.30541	up	0	RAT04274	0	mRNA	Tmem8a	transmembrane protein 8A	NA	NA	NM_001106991	NA	NA	NA	NA_x000D_
RAT14870	4.31347	A	5.40052	P	0.470723	2.12439	down	0	RAT14870	0	mRNA	NA	NA	NA	NA	NA	NA	NA	NA	NA_x000D_
RAT01389	5.80486	P	6.95218	P	0.451464	2.21502	down	0	RAT01389	0	mRNA	Rtp4	receptor (chemosensory) transporter protein 4	NA	NA	NM_001108321	NA	NA	NA	NA_x000D_
RAT02866	7.3794	P	6.11266	P	2.40617	2.40617	up	0	RAT02866	0	mRNA	Nudt5	nudix (nucleoside diphosphate linked moiety X)-type motif 5	NA	NA	NM_001007733	NA	NA	NA	NA_x000D_
RAT19957	9.31881	P	8.24901	P	2.09914	2.09914	up	0	RAT19957	0	mRNA	NA	NA	NA	NA	NA	NA	NA	NA	NA_x000D_
RAT13041	7.34931	P	8.99108	P	0.320462	3.1205	down	0	RAT13041	0	mRNA	Il34	interleukin 34	NA	NA	NM_001025766	NA	NA	NA	NA_x000D_
RAT13968	6.30567	P	7.47099	P	0.445862	2.24284	down	0	RAT13968	0	mRNA	Arhgap20	Rho GTPase activating protein 20	NA	NA	NM_213629	NA	NA	NA	NA_x000D_
RAT01975	7.76254	P	6.53261	P	2.34555	2.34555	up	0	RAT01975	0	mRNA	G0s2	G0/G1switch 2	NA	NA	NM_001009632	NA	NA	NA	NA_x000D_
RAT22481	7.69175	P	8.80349	P	0.462735	2.16106	down	0	RAT22481	0	mRNA	Gtsf1	gametocyte specific factor 1	NA	NA	NM_001079707	NA	NA	NA	NA_x000D_
RAT02113	5.14611	P	3.16393	A	3.95089	3.95089	up	0	RAT02113	0	mRNA	Ptn	pleiotrophin	NA	NA	NM_017066	NA	NA	NA	NA_x000D_
RAT06169	13.4577	P	12.2992	P	2.23225	2.23225	up	0	RAT06169	0	mRNA	Ndufa4	"NADH dehydrogenase (ubiquinone) 1 alpha subcomplex, 4"	NA	NA	NM_001127684	NA	NA	NA	NA_x000D_
RAT10830	5.14391	P	2.86332	A	4.85876	4.85876	up	0	RAT10830	0	mRNA	NA	NA	NA	NA	NA	NA	NA	NA	NA_x000D_
RAT13986	5.26997	P	6.35423	P	0.471636	2.12028	down	0	RAT13986	0	mRNA	NA	NA	NA	NA	XM_217965	NA	NA	NA	NA_x000D_
RAT13557	5.52697	P	3.71486	A	3.51157	3.51157	up	0	RAT13557	0	mRNA	Xxylt1	xyloside xylosyltransferase 1	NA	NA	ENSRNOT00000002356	NA	NA	NA	NA_x000D_
RAT10043	7.41383	P	5.92348	P	2.80956	2.80956	up	0	RAT10043	0	mRNA	Golga7	golgin A7	NA	NA	NM_001007731	NA	NA	NA	NA_x000D_
RAT06141	9.75701	P	11.1559	P	0.379218	2.63701	down	0	RAT06141	0	mRNA	Cdk18	cyclin-dependent kinase 18	NA	NA	NM_001100506	NA	NA	NA	NA_x000D_
RAT05843	12.0626	P	10.8773	P	2.27418	2.27418	up	0	RAT05843	0	mRNA	Fasn	fatty acid synthase	NA	NA	NM_017332	NA	NA	NA	NA_x000D_
RAT01002	7.92396	P	6.90194	P	2.03076	2.03076	up	0	RAT01002	0	mRNA	Fbxl4	F-box and leucine-rich repeat protein 4	NA	NA	NM_001107919	NA	NA	NA	NA_x000D_
RAT01852	9.55869	P	8.24171	P	2.49144	2.49144	up	0	RAT01852	0	mRNA	LOC100363987	mCG114897-like	NA	NA	XR_085743	NA	NA	NA	NA_x000D_
RAT06666	2.54583	A	6.23581	P	0.0774828	12.9061	down	0	RAT06666	0	mRNA	Brca1	breast cancer 1	NA	NA	NM_012514	NA	NA	NA	NA_x000D_
RAT11001	6.76862	P	5.11647	A	3.14302	3.14302	up	0	RAT11001	0	mRNA	Echdc1	enoyl CoA hydratase domain containing 1	NA	NA	NM_001007734	NA	NA	NA	NA_x000D_
RAT29645	5.6595	P	3.94589	A	3.27981	3.27981	up	0	RAT29645	0	mRNA	Olr95	olfactory receptor 95	NA	NA	NM_001001024	NA	NA	NA	NA_x000D_
RAT09435	5.68679	P	3.8738	A	3.51369	3.51369	up	0	RAT09435	0	mRNA	Rad1	RAD1 homolog (S. pombe)	NA	NA	NM_001106419	NA	NA	NA	NA_x000D_
RAT20258	15.7327	P	14.601	P	2.19112	2.19112	up	0	RAT20258	0	mRNA	Prom1	prominin 1	NA	NA	NM_021751	NA	NA	NA	NA_x000D_
RAT12160	14.5721	P	13.4	P	2.25339	2.25339	up	0	RAT12160	0	mRNA	Rnase12	"ribonuclease, RNase A family, 12 (non-active)"	NA	NA	NM_001012209	NA	NA	NA	NA_x000D_
RAT08132	5.34227	P	6.56704	P	0.427867	2.33718	down	0	RAT08132	0	mRNA	Snx33	sorting nexin 33	NA	NA	NM_001127488	NA	NA	NA	NA_x000D_
RAT00420	7.60786	P	5.98928	P	3.07073	3.07073	up	0	RAT00420	0	mRNA	Rasl11b	RAS-like family 11 member B	NA	NA	NM_001002830	NA	NA	NA	NA_x000D_
RAT26656	5.47761	P	4.42008	A	2.08136	2.08136	up	0	RAT26656	0	mRNA	Zfp12	zinc finger protein 12	NA	NA	XM_001072483	NA	NA	NA	NA_x000D_
RAT14528	4.69976	A	5.84104	P	0.453356	2.20577	down	0	RAT14528	0	mRNA	RGD1559903	similar to RIKEN cDNA 1700049L16	NA	NA	NM_001109337	NA	NA	NA	NA_x000D_
RAT01020	7.50965	P	5.97643	P	2.8943	2.8943	up	0	RAT01020	0	mRNA	Ints10	integrator complex subunit 10	NA	NA	NM_001134416	NA	NA	NA	NA_x000D_
RAT01103	10.941	P	9.48271	P	2.74785	2.74785	up	0	RAT01103	0	mRNA	Cad	"carbamoyl-phosphate synthetase 2, aspartate transcarbamylase, and dihydroorotase"	NA	NA	NM_001105710	NA	NA	NA	NA_x000D_
RAT14167	6.10157	P	4.99732	A	2.14986	2.14986	up	0	RAT14167	0	mRNA	Slc10a6	"solute carrier family 10 (sodium/bile acid cotransporter family), member 6"	NA	NA	NM_198049	NA	NA	NA	NA_x000D_
RAT00400	9.67964	P	8.59795	P	2.1165	2.1165	up	0	RAT00400	0	mRNA	Klhl14	kelch-like 14 (Drosophila)	NA	NA	NM_001108885	NA	NA	NA	NA_x000D_
RAT19129	6.9616	P	8.32533	P	0.388577	2.57349	down	0	RAT19129	0	mRNA	LOC501251	similar to Discs large homolog 5 (Placenta and prostate DLG) (Discs large protein P-dlg)	NA	NA	XM_576670	NA	NA	NA	NA_x000D_
RAT15883	7.14037	P	6.12529	P	2.02103	2.02103	up	0	RAT15883	0	mRNA	NA	NA	NA	NA	NA	NA	NA	NA	NA_x000D_
RAT26192	2.54683	A	5.30114	P	0.148208	6.74728	down	0	RAT26192	0	mRNA	Hand2	heart and neural crest derivatives expressed 2	NA	NA	NM_022696	NA	NA	NA	NA_x000D_
RAT01777	9.4141	P	11.2378	P	0.2825	3.53982	down	0	RAT01777	0	mRNA	Tgm2	"transglutaminase 2, C polypeptide"	NA	NA	NM_019386	NA	NA	NA	NA_x000D_
RAT20401	12.266	P	11.1747	P	2.13054	2.13054	up	0	RAT20401	0	mRNA	Wfdc15b	WAP four-disulfide core domain 15B	NA	NA	NM_001009179	NA	NA	NA	NA_x000D_
RAT04287	5.25946	P	3.88119	A	2.59955	2.59955	up	0	RAT04287	0	mRNA	Ppargc1b	"peroxisome proliferator-activated receptor gamma, coactivator 1 beta"	NA	NA	NM_176075	NA	NA	NA	NA_x000D_
RAT17498	5.19476	P	3.97567	A	2.328	2.328	up	0	RAT17498	0	mRNA	NA	NA	NA	NA	NA	NA	NA	NA	NA_x000D_
RAT21390	7.96157	P	9.47436	P	0.350435	2.8536	down	0	RAT21390	0	mRNA	Dkk3	dickkopf 3 homolog (Xenopus laevis)	NA	NA	NM_138519	NA	NA	NA	NA_x000D_
RAT11525	7.00522	P	5.61677	P	2.61798	2.61798	up	0	RAT11525	0	mRNA	Gpr116	G protein-coupled receptor 116	NA	NA	NM_139110	NA	NA	NA	NA_x000D_
RAT25035	7.40503	P	6.28133	P	2.17905	2.17905	up	0	RAT25035	0	mRNA	NA	NA	NA	NA	ENSRNOT00000065773	NA	NA	NA	NA_x000D_
RAT10431	6.93182	P	5.32686	P	3.04188	3.04188	up	0	RAT10431	0	mRNA	Bag4	BCL2-associated athanogene 4	NA	NA	NM_001025130	NA	NA	NA	NA_x000D_
RAT23125	6.68121	P	2.59805	A	16.9494	16.9494	up	0	RAT23125	0	mRNA	NA	NA	NA	NA	NA	NA	NA	NA	NA_x000D_
RAT07361	5.08512	A	7.30602	P	0.214507	4.66186	down	0	RAT07361	0	mRNA	Arhgap29	Rho GTPase activating protein 29	NA	NA	NM_001009405	NA	NA	NA	NA_x000D_
RAT21640	6.6189	P	3.8999	A	6.58417	6.58417	up	0	RAT21640	0	mRNA	Krt33b	keratin 33B	NA	NA	NM_001008819	NA	NA	NA	NA_x000D_
RAT19470	5.19081	P	2.47086	A	6.58854	6.58854	up	0	RAT19470	0	mRNA	Batf3	"basic leucine zipper transcription factor, ATF-like 3"	NA	NA	NM_021865	NA	NA	NA	NA_x000D_
RAT03903	8.88003	P	7.673	P	2.30863	2.30863	up	0	RAT03903	0	mRNA	Hal	histidine ammonia lyase	NA	NA	NM_017159	NA	NA	NA	NA_x000D_
RAT07621	5.93043	P	4.72498	A	2.30609	2.30609	up	0	RAT07621	0	mRNA	Pnmal1	PNMA-like 1	NA	NA	NM_001108473	NA	NA	NA	NA_x000D_
RAT03046	9.39007	P	7.61474	P	3.42318	3.42318	up	0	RAT03046	0	mRNA	Nek4	NIMA (never in mitosis gene a)-related kinase 4	NA	NA	NM_001013134	NA	NA	NA	NA_x000D_
RAT12373	3.7872	A	5.29609	P	0.35138	2.84592	down	0	RAT12373	0	mRNA	LOC679861	similar to MIC2 like 1	NA	NA	EV777635	NA	NA	NA	NA_x000D_
RAT25014	5.66101	P	6.7114	P	0.482836	2.0711	down	0	RAT25014	0	mRNA	Peg12	paternally expressed 12	NA	NA	NM_001170562	NA	NA	NA	NA_x000D_
RAT01387	5.98221	P	8.54141	P	0.16967	5.89381	down	0	RAT01387	0	mRNA	Dpf1	"D4, zinc and double PHD fingers family 1"	NA	NA	NM_001105729	NA	NA	NA	NA_x000D_
RAT23662	7.59347	P	6.34473	P	2.37634	2.37634	up	0	RAT23662	0	mRNA	NA	NA	NA	NA	ENSRNOT00000031735	NA	NA	NA	NA_x000D_
RAT03970	8.62792	P	9.62876	P	0.499711	2.00116	down	0	RAT03970	0	mRNA	Wbscr28	Williams-Beuren syndrome chromosome region 28 (human)	NA	NA	ENSRNOT00000033499	NA	NA	NA	NA_x000D_
RAT10603	7.72759	P	8.84459	P	0.461051	2.16896	down	0	RAT10603	0	mRNA	Vasn	vasorin	NA	NA	NM_001109382	NA	NA	NA	NA_x000D_
RAT24278	8.57753	P	7.53837	P	2.05502	2.05502	up	0	RAT24278	0	mRNA	NA	NA	NA	NA	NA	NA	NA	NA	NA_x000D_
RAT26102	2.4274	A	5.78369	P	0.0976469	10.241	down	0	RAT26102	0	mRNA	Utf1	undifferentiated embryonic cell transcription factor 1	NA	NA	NM_001131032	NA	NA	NA	NA_x000D_
RAT07516	5.89299	P	4.71987	A	2.25499	2.25499	up	0	RAT07516	0	mRNA	RGD1311078	LOC360664	NA	NA	NM_001108307	NA	NA	NA	NA_x000D_
RAT27454	7.52776	P	8.58706	P	0.479866	2.08392	down	0	RAT27454	0	mRNA	NA	NA	NA	NA	NA	NA	NA	NA	NA_x000D_
RAT19307	9.88759	P	11.4571	P	0.336928	2.968	down	0	RAT19307	0	mRNA	RGD1304694	similar to CG9646-PA	NA	NA	ENSRNOT00000042070	NA	NA	NA	NA_x000D_
RAT08862	6.15009	P	8.03556	P	0.270655	3.69474	down	0	RAT08862	0	mRNA	Ptrf	polymerase I and transcript release factor	NA	NA	NM_001105841	NA	NA	NA	NA_x000D_
RAT05615	4.6096	A	7.02437	P	0.187535	5.33234	down	0	RAT05615	0	mRNA	Tbc1d2b	"TBC1 domain family, member 2B"	NA	NA	NM_001108175	NA	NA	NA	NA_x000D_
RAT13962	9.16199	P	8.06116	P	2.14478	2.14478	up	0	RAT13962	0	mRNA	Prkch	"protein kinase C, eta"	NA	NA	NM_031085	NA	NA	NA	NA_x000D_
RAT11313	5.20596	P	3.30739	A	3.72846	3.72846	up	0	RAT11313	0	mRNA	Mpped1	metallophosphoesterase domain containing 1	NA	NA	NM_001130569	NA	NA	NA	NA_x000D_
[truncated: 1,711 more rows]

## Sheet: Up
ProbeName	Gaozhi_NS	Gaozhi_flags	ZhengC_NS	ZhengC_flags	foldchange	foldchange(abs)	Regulation	ControlType	ProbeName.1	ControlType.1	Classify	GeneSymbol	Description	Seq_id	Target_id	Target_id_1	Target_chr	Target_strand	Target_start	Target_end_x000D_
RAT03993	7.73944	P	6.61234	P	2.1842	2.1842	up	0	RAT03993	0	mRNA	Tctex1d2	Tctex1 domain containing 2	NA	NA	NM_001109054	NA	NA	NA	NA_x000D_
RAT18599	14.4159	P	13.2344	P	2.26824	2.26824	up	0	RAT18599	0	mRNA	Defb43	defensin beta 43	NA	NA	NM_001037528	NA	NA	NA	NA_x000D_
RAT18919	8.42943	P	7.2278	P	2.3	2.3	up	0	RAT18919	0	mRNA	Fam84a	"family with sequence similarity 84, member A"	NA	NA	NM_001127299	NA	NA	NA	NA_x000D_
RAT29482	5.67521	P	3.4676	A	4.61912	4.61912	up	0	RAT29482	0	mRNA	Hist1h2bh	"histone cluster 1, H2bh"	NA	NA	NM_001107352	NA	NA	NA	NA_x000D_
RAT28964	5.41885	P	3.69196	A	3.31012	3.31012	up	0	RAT28964	0	mRNA	Cbx2	chromobox homolog 2	NA	NA	NM_001107071	NA	NA	NA	NA_x000D_
RAT03013	6.66163	P	5.31992	A	2.53452	2.53452	up	0	RAT03013	0	mRNA	Ovol2	ovo-like 2 (Drosophila)	NA	NA	NM_001106519	NA	NA	NA	NA_x000D_
RAT26355	6.03188	P	4.43064	A	3.03406	3.03406	up	0	RAT26355	0	mRNA	Depdc5	DEP domain containing 5	NA	NA	NM_001107229	NA	NA	NA	NA_x000D_
RAT08228	6.34693	P	2.86038	A	11.2087	11.2087	up	0	RAT08228	0	mRNA	LOC680262	hypothetical protein LOC680262	NA	NA	XM_001056376	NA	NA	NA	NA_x000D_
RAT26284	6.83654	P	3.67466	A	8.94991	8.94991	up	0	RAT26284	0	mRNA	Slc7a4	"solute carrier family 7 (cationic amino acid transporter, y+ system), member 4"	NA	NA	NM_001107078	NA	NA	NA	NA_x000D_
RAT06672	5.7333	P	4.032	A	3.25194	3.25194	up	0	RAT06672	0	mRNA	Il1a	interleukin 1 alpha	NA	NA	NM_017019	NA	NA	NA	NA_x000D_
RAT25763	6.32887	P	4.33001	A	3.99682	3.99682	up	0	RAT25763	0	mRNA	Kbtbd3	kelch repeat and BTB (POZ) domain containing 3	NA	NA	NM_001108121	NA	NA	NA	NA_x000D_
RAT09817	5.77545	P	3.0587	A	6.57391	6.57391	up	0	RAT09817	0	mRNA	Paip1	poly(A) binding protein interacting protein 1	NA	NA	NM_001108937	NA	NA	NA	NA_x000D_
RAT03758	6.74145	P	5.28148	A	2.75102	2.75102	up	0	RAT03758	0	mRNA	Gtf2e2	"general transcription factor IIE, polypeptide 2, beta"	NA	NA	NM_001107318	NA	NA	NA	NA_x000D_
RAT03011	8.65379	P	7.55882	P	2.13609	2.13609	up	0	RAT03011	0	mRNA	Jagn1	jagunal homolog 1 (Drosophila)	NA	NA	NM_001044272	NA	NA	NA	NA_x000D_
RAT01044	6.5652	P	4.64704	A	3.7794	3.7794	up	0	RAT01044	0	mRNA	RGD1311558	similar to 4930506M07Rik protein	NA	NA	NM_001079705	NA	NA	NA	NA_x000D_
RAT05563	8.97136	P	6.6248	P	5.0861	5.0861	up	0	RAT05563	0	mRNA	Tfrc	transferrin receptor	NA	NA	NM_022712	NA	NA	NA	NA_x000D_
RAT06966	5.94667	P	4.69162	A	2.38676	2.38676	up	0	RAT06966	0	mRNA	Pknox1	PBX/knotted 1 homeobox 1	NA	NA	NM_001013074	NA	NA	NA	NA_x000D_
RAT12217	5.63333	P	4.09567	A	2.90324	2.90324	up	0	RAT12217	0	mRNA	Zfp639	zinc finger protein 639	NA	NA	NM_001080907	NA	NA	NA	NA_x000D_
RAT27579	6.43241	P	4.91261	A	2.86753	2.86753	up	0	RAT27579	0	mRNA	Ddx59	DEAD (Asp-Glu-Ala-Asp) box polypeptide 59	NA	NA	NM_001190820	NA	NA	NA	NA_x000D_
RAT20385	6.61038	P	2.80445	A	13.9862	13.9862	up	0	RAT20385	0	mRNA	Birc7	baculoviral IAP repeat-containing 7	NA	NA	XM_001058257	NA	NA	NA	NA_x000D_
RAT03890	8.07909	P	7.0029	P	2.10846	2.10846	up	0	RAT03890	0	mRNA	Txndc9	thioredoxin domain containing 9	NA	NA	NM_172032	NA	NA	NA	NA_x000D_
RAT00625	6.44635	P	4.9088	A	2.90302	2.90302	up	0	RAT00625	0	mRNA	Cep78	centrosomal protein 78	NA	NA	NM_021741	NA	NA	NA	NA_x000D_
RAT00204	6.57352	P	5.43642	P	2.19938	2.19938	up	0	RAT00204	0	mRNA	Ncoa7	nuclear receptor coactivator 7	NA	NA	ENSRNOT00000018849	NA	NA	NA	NA_x000D_
RAT01032	10.6833	P	9.29325	P	2.62087	2.62087	up	0	RAT01032	0	mRNA	Atp6v0d2	"ATPase, H+ transporting, lysosomal V0 subunit D2"	NA	NA	NM_001011972	NA	NA	NA	NA_x000D_
RAT00102	8.84613	P	7.84586	P	2.00038	2.00038	up	0	RAT00102	0	mRNA	RGD1561113	similar to Hypothetical UPF0184 protein C9orf16 homolog	NA	NA	ENSRNOT00000034930	NA	NA	NA	NA_x000D_
RAT07238	6.12267	P	4.79772	A	2.50523	2.50523	up	0	RAT07238	0	mRNA	Eif2b3	"eukaryotic translation initiation factor 2B, subunit 3"	NA	NA	NM_133609	NA	NA	NA	NA_x000D_
RAT04360	7.58759	P	6.23113	P	2.56056	2.56056	up	0	RAT04360	0	mRNA	Slc24a5	"solute carrier family 24, member 5"	NA	NA	NM_001107769	NA	NA	NA	NA_x000D_
RAT00709	6.05609	P	4.71677	A	2.53032	2.53032	up	0	RAT00709	0	mRNA	Filip1	filamin A interacting protein 1	NA	NA	NM_145682	NA	NA	NA	NA_x000D_
RAT16549	6.99717	P	5.51051	A	2.8024	2.8024	up	0	RAT16549	0	mRNA	LOC498368	similar to RIKEN cDNA 0610040J01	NA	NA	NM_001017500	NA	NA	NA	NA_x000D_
RAT18916	6.47691	P	5.01706	A	2.75079	2.75079	up	0	RAT18916	0	mRNA	Fam81a	"family with sequence similarity 81, member A"	NA	NA	NM_001108163	NA	NA	NA	NA_x000D_
RAT20661	18.5535	P	17.5531	P	2.00064	2.00064	up	0	RAT20661	0	mRNA	Wfdc10	WAP four-disulfide core domain 10	NA	NA	NM_001109461	NA	NA	NA	NA_x000D_
RAT12400	7.9202	P	6.52934	P	2.62234	2.62234	up	0	RAT12400	0	mRNA	Ces1e	carboxylesterase 1E	NA	NA	NM_031565	NA	NA	NA	NA_x000D_
RAT11082	11.2649	P	9.67583	P	3.00853	3.00853	up	0	RAT11082	0	mRNA	Galm	galactose mutarotase (aldose 1-epimerase)	NA	NA	NM_001007704	NA	NA	NA	NA_x000D_
RAT07477	5.77742	P	4.33066	A	2.72596	2.72596	up	0	RAT07477	0	mRNA	Rfwd3	ring finger and WD repeat domain 3	NA	NA	ENSRNOT00000025604	NA	NA	NA	NA_x000D_
RAT01120	10.6077	P	9.14862	P	2.74934	2.74934	up	0	RAT01120	0	mRNA	Commd10	COMM domain containing 10	NA	NA	NM_001004276	NA	NA	NA	NA_x000D_
RAT24760	6.51502	P	4.03186	A	5.59123	5.59123	up	0	RAT24760	0	mRNA	Cpsf2	cleavage and polyadenylation specific factor 2	NA	NA	NM_001106753	NA	NA	NA	NA_x000D_
RAT13656	7.86091	P	6.4195	P	2.71588	2.71588	up	0	RAT13656	0	mRNA	Slc9a2	"solute carrier family 9 (sodium/hydrogen exchanger), member 2"	NA	NA	NM_001113335	NA	NA	NA	NA_x000D_
RAT08395	5.49077	P	3.31163	A	4.52882	4.52882	up	0	RAT08395	0	mRNA	Mllt10	"myeloid/lymphoid or mixed-lineage leukemia (trithorax homolog, Drosophila); translocated to, 10"	NA	NA	NM_001012162	NA	NA	NA	NA_x000D_
A_44_P761041	7.15835	P	4.93626	A	4.66569	4.66569	up	0	A_44_P761041	0	mRNA	Trim2	tripartite motif-containing 2	NA	NA	NM_001108552	NA	NA	NA	NA_x000D_
RAT09733	10.638	P	9.63637	P	2.00223	2.00223	up	0	RAT09733	0	mRNA	Surf4	surfeit 4	NA	NA	NM_001033868	NA	NA	NA	NA_x000D_
RAT16069	9.17651	P	7.09184	P	4.24177	4.24177	up	0	RAT16069	0	mRNA	RGD1560925	similar to 2610034M16Rik protein	NA	NA	ENSRNOT00000014921	NA	NA	NA	NA_x000D_
RAT01430	7.56107	P	6.01768	P	2.9148	2.9148	up	0	RAT01430	0	mRNA	Mtmr4	myotubularin related protein 4	NA	NA	NM_001105827	NA	NA	NA	NA_x000D_
RAT07457	6.81427	P	3.44489	A	10.3344	10.3344	up	0	RAT07457	0	mRNA	Slc46a1	"solute carrier family 46 (folate transporter), member 1"	NA	NA	NM_001013969	NA	NA	NA	NA_x000D_
RAT05274	6.66369	P	5.6248	P	2.05464	2.05464	up	0	RAT05274	0	mRNA	Carkd	carbohydrate kinase domain containing	NA	NA	NM_001108402	NA	NA	NA	NA_x000D_
RAT02635	6.53898	P	5.07348	A	2.7616	2.7616	up	0	RAT02635	0	mRNA	Rap1gap2	RAP1 GTPase activating protein 2	NA	NA	NM_001107019	NA	NA	NA	NA_x000D_
RAT23497	7.00124	P	4.84196	A	4.46694	4.46694	up	0	RAT23497	0	mRNA	Defb15	defensin beta 15	NA	NA	NM_001037520	NA	NA	NA	NA_x000D_
RAT02139	9.38211	P	7.69843	P	3.21248	3.21248	up	0	RAT02139	0	mRNA	St6galnac3	"ST6 (alpha-N-acetyl-neuraminyl-2,3-beta-galactosyl-1,3)-N-acetylgalactosaminide alpha-2,6-sialyltransferase 3"	NA	NA	NM_019123	NA	NA	NA	NA_x000D_
RAT06646	8.86484	P	7.21793	P	3.13163	3.13163	up	0	RAT06646	0	mRNA	Slc5a11	"solute carrier family 5 (sodium/glucose cotransporter), member 11"	NA	NA	NM_001100482	NA	NA	NA	NA_x000D_
RAT16861	6.08649	P	4.9042	A	2.26937	2.26937	up	0	RAT16861	0	mRNA	RGD1307465	similar to RIKEN cDNA 8430406I07	NA	NA	NM_001009655	NA	NA	NA	NA_x000D_
RAT27938	5.81386	P	4.70818	A	2.152	2.152	up	0	RAT27938	0	mRNA	RGD1564342	similar to hypothetical protein FLJ32685	NA	NA	ENSRNOT00000030991	NA	NA	NA	NA_x000D_
RAT22298	6.22508	P	5.03191	A	2.28654	2.28654	up	0	RAT22298	0	mRNA	Mrvi1	murine retrovirus integration site 1 homolog	NA	NA	NM_001105210	NA	NA	NA	NA_x000D_
RAT03548	7.38768	P	6.10798	P	2.42789	2.42789	up	0	RAT03548	0	mRNA	Atp6ap2	"ATPase, H+ transporting, lysosomal accessory protein 2"	NA	NA	NM_001007091	NA	NA	NA	NA_x000D_
RAT00795	9.98088	P	7.91095	P	4.19865	4.19865	up	0	RAT00795	0	mRNA	RGD1560925	similar to 2610034M16Rik protein	NA	NA	ENSRNOT00000056434	NA	NA	NA	NA_x000D_
RAT02525	13.251	P	12.2353	P	2.02177	2.02177	up	0	RAT02525	0	mRNA	Glud1	glutamate dehydrogenase 1	NA	NA	NM_012570	NA	NA	NA	NA_x000D_
RAT11400	6.26064	P	5.2064	A	2.07662	2.07662	up	0	RAT11400	0	mRNA	Cdc42se2	CDC42 small effector 2	NA	NA	NM_001126089	NA	NA	NA	NA_x000D_
RAT20455	16.9949	P	15.807	P	2.27825	2.27825	up	0	RAT20455	0	mRNA	Fth1	"ferritin, heavy polypeptide 1"	NA	NA	NM_012848	NA	NA	NA	NA_x000D_
RAT07225	11.1133	P	9.746	P	2.5799	2.5799	up	0	RAT07225	0	mRNA	Aldh1a7	"aldehyde dehydrogenase family 1, subfamily A7"	NA	NA	NM_017272	NA	NA	NA	NA_x000D_
RAT01324	8.12697	P	6.29506	P	3.5601	3.5601	up	0	RAT01324	0	mRNA	Tbc1d9	"TBC1 domain family, member 9"	NA	NA	NM_001134539	NA	NA	NA	NA_x000D_
RAT10482	5.51613	P	4.50267	A	2.01875	2.01875	up	0	RAT10482	0	mRNA	Invs	inversin	NA	NA	NM_001107932	NA	NA	NA	NA_x000D_
RAT25769	11.1158	P	9.61441	P	2.83114	2.83114	up	0	RAT25769	0	mRNA	Snx25	sorting nexin 25	NA	NA	XM_001061047	NA	NA	NA	NA_x000D_
RAT00718	10.1888	P	8.96227	P	2.34002	2.34002	up	0	RAT00718	0	mRNA	Slc31a2	"solute carrier family 31 (copper transporters), member 2"	NA	NA	NM_001033693	NA	NA	NA	NA_x000D_
RAT04665	8.12942	P	7.10863	P	2.02904	2.02904	up	0	RAT04665	0	mRNA	Blnk	B-cell linker	NA	NA	NM_001025767	NA	NA	NA	NA_x000D_
RAT02516	12.0346	P	10.9861	P	2.06833	2.06833	up	0	RAT02516	0	mRNA	Btg1	"B-cell translocation gene 1, anti-proliferative"	NA	NA	NM_017258	NA	NA	NA	NA_x000D_
RAT10560	5.40604	P	3.15558	A	4.75833	4.75833	up	0	RAT10560	0	mRNA	Gpr155	G protein-coupled receptor 155	NA	NA	NM_001107811	NA	NA	NA	NA_x000D_
RAT09882	8.56611	P	7.16008	P	2.65006	2.65006	up	0	RAT09882	0	mRNA	Plcg2	"phospholipase C, gamma 2"	NA	NA	NM_017168	NA	NA	NA	NA_x000D_
RAT05103	7.68152	P	2.88471	A	27.796	27.796	up	0	RAT05103	0	mRNA	Ccl21	chemokine (C-C motif) ligand 21	NA	NA	NM_001008513	NA	NA	NA	NA_x000D_
RAT20565	5.27008	P	3.96286	A	2.47465	2.47465	up	0	RAT20565	0	mRNA	Zfp800	zinc finger protein 800	NA	NA	NM_001109225	NA	NA	NA	NA_x000D_
RAT00634	9.36168	P	7.9827	P	2.60085	2.60085	up	0	RAT00634	0	mRNA	Pfn2	profilin 2	NA	NA	NM_030873	NA	NA	NA	NA_x000D_
RAT10389	9.20979	P	7.51779	P	3.23103	3.23103	up	0	RAT10389	0	mRNA	LOC679126	similar to SMAD-interacting zinc finger protein 2	NA	NA	XM_001054555	NA	NA	NA	NA_x000D_
RAT07009	5.43671	P	3.85962	A	2.98368	2.98368	up	0	RAT07009	0	mRNA	LOC691543	hypothetical protein LOC691543	NA	NA	NM_001109645	NA	NA	NA	NA_x000D_
RAT00238	7.41255	P	5.93005	P	2.79433	2.79433	up	0	RAT00238	0	mRNA	RGD1305347	similar to RIKEN cDNA 2610528J11	NA	NA	NM_001108674	NA	NA	NA	NA_x000D_
RAT05701	9.12542	P	8.11184	P	2.01892	2.01892	up	0	RAT05701	0	mRNA	Cacybp	calcyclin binding protein	NA	NA	NM_001004208	NA	NA	NA	NA_x000D_
RAT00485	7.83764	P	6.41887	P	2.67359	2.67359	up	0	RAT00485	0	mRNA	Sorl1	"sortilin-related receptor, LDLR class A repeats-containing"	NA	NA	NM_053519	NA	NA	NA	NA_x000D_
RAT26945	6.0879	P	4.36998	A	3.28962	3.28962	up	0	RAT26945	0	mRNA	Col7a1	"procollagen, type VII, alpha 1"	NA	NA	NM_001106858	NA	NA	NA	NA_x000D_
RAT29032	8.04649	P	6.96853	P	2.11105	2.11105	up	0	RAT29032	0	mRNA	Rspry1	ring finger and SPRY domain containing 1	NA	NA	NM_001100945	NA	NA	NA	NA_x000D_
RAT25402	8.56737	P	7.48138	P	2.12284	2.12284	up	0	RAT25402	0	mRNA	Bsdc1	BSD domain containing 1	NA	NA	NM_001106636	NA	NA	NA	NA_x000D_
RAT01126	7.03252	P	5.94417	P	2.12631	2.12631	up	0	RAT01126	0	mRNA	Ttc30b	tetratricopeptide repeat domain 30B	NA	NA	NM_001127607	NA	NA	NA	NA_x000D_
RAT25259	12.2031	P	11.0545	P	2.21695	2.21695	up	0	RAT25259	0	mRNA	Tmed2	transmembrane emp24 domain trafficking protein 2	NA	NA	NM_031722	NA	NA	NA	NA_x000D_
RAT00020	5.84962	P	4.43743	A	2.6614	2.6614	up	0	RAT00020	0	mRNA	Supv3l1	"suppressor of var1, 3-like 1 (S. cerevisiae)"	NA	NA	NM_001012462	NA	NA	NA	NA_x000D_
RAT09764	5.95814	P	4.93637	A	2.03041	2.03041	up	0	RAT09764	0	mRNA	Cyp2r1	"cytochrome P450, family 2, subfamily r, polypeptide 1"	NA	NA	NM_001108499	NA	NA	NA	NA_x000D_
RAT08549	7.81562	P	6.57465	P	2.36358	2.36358	up	0	RAT08549	0	mRNA	Pemt	phosphatidylethanolamine N-methyltransferase	NA	NA	NM_013003	NA	NA	NA	NA_x000D_
RAT01345	7.63363	P	5.62892	P	4.01307	4.01307	up	0	RAT01345	0	mRNA	Adck1	aarF domain containing kinase 1	NA	NA	NM_001108985	NA	NA	NA	NA_x000D_
RAT03438	7.03157	P	5.80285	P	2.34358	2.34358	up	0	RAT03438	0	mRNA	Slc22a5	"solute carrier family 22 (organic cation/carnitine transporter), member 5"	NA	NA	NM_019269	NA	NA	NA	NA_x000D_
RAT08685	5.93018	P	4.27237	A	3.15537	3.15537	up	0	RAT08685	0	mRNA	Pex7	peroxisomal biogenesis factor 7	NA	NA	NM_001034147	NA	NA	NA	NA_x000D_
RAT07674	9.60133	P	8.55072	P	2.0714	2.0714	up	0	RAT07674	0	mRNA	Gstk1	glutathione S-transferase kappa 1	NA	NA	NM_181371	NA	NA	NA	NA_x000D_
RAT20578	12.2812	P	11.2438	P	2.05254	2.05254	up	0	RAT20578	0	mRNA	Gpr64	G protein-coupled receptor 64	NA	NA	NM_181366	NA	NA	NA	NA_x000D_
RAT10313	8.14075	P	6.69398	P	2.72596	2.72596	up	0	RAT10313	0	mRNA	Ankmy2	ankyrin repeat and MYND domain containing 2	NA	NA	NM_001108019	NA	NA	NA	NA_x000D_
RAT09917	7.60642	P	6.07785	P	2.88499	2.88499	up	0	RAT09917	0	mRNA	Acbd3	acyl-CoA binding domain containing 3	NA	NA	NM_182843	NA	NA	NA	NA_x000D_
RAT16451	8.57974	P	7.48082	P	2.14194	2.14194	up	0	RAT16451	0	mRNA	Tars	threonyl-tRNA synthetase	NA	NA	NM_001006976	NA	NA	NA	NA_x000D_
RAT12888	5.47043	P	4.39503	A	2.1073	2.1073	up	0	RAT12888	0	mRNA	RGD1559762	similar to RIKEN cDNA 4933436I01	NA	NA	XM_002725650	NA	NA	NA	NA_x000D_
RAT01547	9.7782	P	8.28545	P	2.81424	2.81424	up	0	RAT01547	0	mRNA	Cyfip2	cytoplasmic FMR1 interacting protein 2	NA	NA	NM_001106996	NA	NA	NA	NA_x000D_
RAT01887	7.83505	P	6.7613	P	2.1049	2.1049	up	0	RAT01887	0	mRNA	MGC94335	similar to hypothetical protein FLJ22555	NA	NA	NM_001004251	NA	NA	NA	NA_x000D_
RAT04199	5.87589	P	4.19935	A	3.19662	3.19662	up	0	RAT04199	0	mRNA	LOC367050	similar to 60S ribosomal protein L35	NA	NA	ENSRNOT00000051023	NA	NA	NA	NA_x000D_
RAT11799	6.0626	P	4.86925	A	2.28684	2.28684	up	0	RAT11799	0	mRNA	LOC686785	"similar to N-acetyltransferase, homolog of S. cerevisiae ARD1"	NA	NA	XR_009033	NA	NA	NA	NA_x000D_
RAT04720	11.6319	P	10.4575	P	2.25708	2.25708	up	0	RAT04720	0	mRNA	Pdia6	"protein disulfide isomerase family A, member 6"	NA	NA	NM_001004442	NA	NA	NA	NA_x000D_
RAT20414	5.90419	P	4.47065	A	2.70108	2.70108	up	0	RAT20414	0	mRNA	Mob1b	MOB kinase activator 1B	NA	NA	NM_001108357	NA	NA	NA	NA_x000D_
RAT29072	9.50567	P	7.67058	P	3.56795	3.56795	up	0	RAT29072	0	mRNA	RGD1562101	similar to very large G-protein coupled receptor 1	NA	NA	ENSRNOT00000039652	NA	NA	NA	NA_x000D_
RAT01844	10.0561	P	8.51697	P	2.90627	2.90627	up	0	RAT01844	0	mRNA	RGD1304644	similar to RIKEN cDNA 2310046K01	NA	NA	NM_001037198	NA	NA	NA	NA_x000D_
RAT21069	7.98591	P	6.891	P	2.136	2.136	up	0	RAT21069	0	mRNA	Yipf4	"Yip1 domain family, member 4"	NA	NA	NM_001009712	NA	NA	NA	NA_x000D_
RAT11063	8.13762	P	7.09468	P	2.06042	2.06042	up	0	RAT11063	0	mRNA	Acpl2	acid phosphatase-like 2	NA	NA	NM_001007710	NA	NA	NA	NA_x000D_
RAT00942	7.72627	P	6.31362	P	2.66225	2.66225	up	0	RAT00942	0	mRNA	Il1a	interleukin 1 alpha	NA	NA	NM_017019	NA	NA	NA	NA_x000D_
RAT26606	9.78211	P	7.89268	P	3.70488	3.70488	up	0	RAT26606	0	mRNA	Wfdc6b	WAP four-disulfide core domain 6B	NA	NA	NM_001008867	NA	NA	NA	NA_x000D_
RAT10890	7.66507	P	6.55618	P	2.15679	2.15679	up	0	RAT10890	0	mRNA	Rnf152	ring finger protein 152	NA	NA	NM_001106305	NA	NA	NA	NA_x000D_
RAT23510	8.51395	P	7.12092	P	2.62631	2.62631	up	0	RAT23510	0	mRNA	Spag5	sperm associated antigen 5	NA	NA	NM_001044224	NA	NA	NA	NA_x000D_
RAT22388	6.93652	P	5.53432	P	2.64304	2.64304	up	0	RAT22388	0	mRNA	Plch1	"phospholipase C, eta 1"	NA	NA	FQ211591	NA	NA	NA	NA_x000D_
RAT20764	5.68831	P	2.71511	A	7.85277	7.85277	up	0	RAT20764	0	mRNA	Olr1641	olfactory receptor 1641	NA	NA	NM_001000100	NA	NA	NA	NA_x000D_
RAT12093	5.4072	P	3.79971	A	3.04721	3.04721	up	0	RAT12093	0	mRNA	RGD1305627	hypothetical LOC314467	NA	NA	NM_001134560	NA	NA	NA	NA_x000D_
RAT15822	6.44083	P	4.23065	A	4.62732	4.62732	up	0	RAT15822	0	mRNA	Atp2b3	"ATPase, Ca++ transporting, plasma membrane 3"	NA	NA	NM_133288	NA	NA	NA	NA_x000D_
A_44_P1047638	7.66676	P	6.25059	P	2.66875	2.66875	up	0	A_44_P1047638	0	mRNA	Ndfip2	Nedd4 family interacting protein 2	NA	NA	NM_001108390	NA	NA	NA	NA_x000D_
RAT27667	10.299	P	9.17598	P	2.17799	2.17799	up	0	RAT27667	0	mRNA	Gcom1	GRINL1A complex locus 1	NA	NA	NM_001014211	NA	NA	NA	NA_x000D_
RAT22591	10.2771	P	8.87783	P	2.63769	2.63769	up	0	RAT22591	0	mRNA	Gpr56	G protein-coupled receptor 56	NA	NA	NM_152242	NA	NA	NA	NA_x000D_
RAT25541	12.043	P	10.9251	P	2.17032	2.17032	up	0	RAT25541	0	mRNA	Manba	"mannosidase, beta A, lysosomal"	NA	NA	NM_001031655	NA	NA	NA	NA_x000D_
RAT02302	13.4629	P	11.5205	P	3.84325	3.84325	up	0	RAT02302	0	mRNA	Defb1	defensin beta 1	NA	NA	NM_031810	NA	NA	NA	NA_x000D_
RAT20981	12.4966	P	11.3731	P	2.17889	2.17889	up	0	RAT20981	0	mRNA	Hoxb7	homeo box B7	NA	NA	NM_001017480	NA	NA	NA	NA_x000D_
RAT18313	5.26347	P	3.92602	A	2.52704	2.52704	up	0	RAT18313	0	mRNA	Dscc1	defective in sister chromatid cohesion 1 homolog (S. cerevisiae)	NA	NA	ENSRNOT00000036399	NA	NA	NA	NA_x000D_
RAT25629	5.67871	P	4.25545	A	2.68193	2.68193	up	0	RAT25629	0	mRNA	Shc2	SHC (Src homology 2 domain containing) transforming protein 2	NA	NA	NM_001108065	NA	NA	NA	NA_x000D_
RAT09358	6.70758	P	5.57072	P	2.19901	2.19901	up	0	RAT09358	0	mRNA	RGD1308396	similar to chromosome 14 open reading frame 21	NA	NA	NM_001106040	NA	NA	NA	NA_x000D_
RAT20696	8.29845	P	7.23031	P	2.09672	2.09672	up	0	RAT20696	0	mRNA	Polr2m	polymerase (RNA) II (DNA directed) polypeptide M	NA	NA	NM_183402	NA	NA	NA	NA_x000D_
RAT10519	8.05851	P	6.89599	P	2.23847	2.23847	up	0	RAT10519	0	mRNA	Irf6	interferon regulatory factor 6	NA	NA	NM_001108859	NA	NA	NA	NA_x000D_
RAT06396	6.44061	P	5.14564	A	2.45372	2.45372	up	0	RAT06396	0	mRNA	Cpped1	calcineurin-like phosphoesterase domain containing 1	NA	NA	NM_001013963	NA	NA	NA	NA_x000D_
RAT08166	6.38366	P	5.25527	A	2.18614	2.18614	up	0	RAT08166	0	mRNA	Pde6d	"phosphodiesterase 6D, cGMP-specific, rod, delta"	NA	NA	NM_001108806	NA	NA	NA	NA_x000D_
RAT11200	5.7729	P	4.13937	A	3.10272	3.10272	up	0	RAT11200	0	mRNA	Fam81a	"family with sequence similarity 81, member A"	NA	NA	NM_001108163	NA	NA	NA	NA_x000D_
RAT12195	5.95502	P	4.93126	A	2.0332	2.0332	up	0	RAT12195	0	mRNA	Gzmb	granzyme B	NA	NA	NM_138517	NA	NA	NA	NA_x000D_
RAT26263	9.87076	P	8.50915	P	2.56973	2.56973	up	0	RAT26263	0	mRNA	Acss2	acyl-CoA synthetase short-chain family member 2	NA	NA	NM_001107793	NA	NA	NA	NA_x000D_
RAT17397	5.53426	P	2.72417	A	7.01324	7.01324	up	0	RAT17397	0	mRNA	LOC501194	similar to hypothetical protein D330021B20	NA	NA	FQ232266	NA	NA	NA	NA_x000D_
RAT14450	12.0751	P	10.8416	P	2.35136	2.35136	up	0	RAT14450	0	mRNA	Defb11	defensin beta 11	NA	NA	NM_001037505	NA	NA	NA	NA_x000D_
RAT10869	10.4882	P	9.01165	P	2.7829	2.7829	up	0	RAT10869	0	mRNA	Tmem123	transmembrane protein 123	NA	NA	NM_001014205	NA	NA	NA	NA_x000D_
RAT12973	11.4931	P	9.95837	P	2.89734	2.89734	up	0	RAT12973	0	mRNA	Ces2i	carboxylesterase 2I	NA	NA	ENSRNOT00000015997	NA	NA	NA	NA_x000D_
RAT18525	7.20671	P	6.19321	P	2.01881	2.01881	up	0	RAT18525	0	mRNA	41528	septin 11	NA	NA	NM_001107208	NA	NA	NA	NA_x000D_
RAT01059	8.59056	P	7.56082	P	2.04165	2.04165	up	0	RAT01059	0	mRNA	MGC125239	hypothetical protein LOC686179	NA	NA	NM_001077231	NA	NA	NA	NA_x000D_
RAT10864	5.51288	P	4.39376	A	2.17215	2.17215	up	0	RAT10864	0	mRNA	Cdc14a	CDC14 cell division cycle 14 homolog A (S. cerevisiae)	NA	NA	NM_001134856	NA	NA	NA	NA_x000D_
RAT12700	9.00891	P	7.92093	P	2.12575	2.12575	up	0	RAT12700	0	mRNA	ST7	suppression of tumorigenicity 7	NA	NA	NM_001004102	NA	NA	NA	NA_x000D_
RAT00095	7.71294	P	6.71034	P	2.0036	2.0036	up	0	RAT00095	0	mRNA	Unc50	unc-50 homolog (C. elegans)	NA	NA	NM_138919	NA	NA	NA	NA_x000D_
RAT22202	7.21258	P	6.07011	P	2.20758	2.20758	up	0	RAT22202	0	mRNA	LOC497848	hypothetical LOC497848	NA	NA	XR_006411	NA	NA	NA	NA_x000D_
RAT22656	5.67353	P	4.25497	A	2.67319	2.67319	up	0	RAT22656	0	mRNA	Haus7	"HAUS augmin-like complex, subunit 7"	NA	NA	NM_001110488	NA	NA	NA	NA_x000D_
RAT01441	10.7145	P	9.56447	P	2.2192	2.2192	up	0	RAT01441	0	mRNA	Tmem229b	transmembrane protein 229B	NA	NA	NM_001109359	NA	NA	NA	NA_x000D_
RAT28121	6.65438	P	5.45267	P	2.30012	2.30012	up	0	RAT28121	0	mRNA	Prrg2	proline rich Gla (G-carboxyglutamic acid) 2	NA	NA	NM_001108482	NA	NA	NA	NA_x000D_
RAT11067	6.21627	P	2.64615	A	11.8772	11.8772	up	0	RAT11067	0	mRNA	Cldn2	claudin 2	NA	NA	NM_001106846	NA	NA	NA	NA_x000D_
RAT07139	7.45044	P	5.65161	P	3.47938	3.47938	up	0	RAT07139	0	mRNA	Tspan12	tetraspanin 12	NA	NA	NM_001015026	NA	NA	NA	NA_x000D_
RAT09648	8.20186	P	7.02181	P	2.26586	2.26586	up	0	RAT09648	0	mRNA	Fam69b	"family with sequence similarity 69, member B"	NA	NA	NM_001014178	NA	NA	NA	NA_x000D_
RAT16331	6.87238	P	5.43024	A	2.71723	2.71723	up	0	RAT16331	0	mRNA	St13	suppression of tumorigenicity 13	NA	NA	NM_031122	NA	NA	NA	NA_x000D_
RAT06580	7.07149	P	5.95912	P	2.162	2.162	up	0	RAT06580	0	mRNA	RGD1565560	similar to ribosomal protein S11	NA	NA	ENSRNOT00000006659	NA	NA	NA	NA_x000D_
RAT00302	8.18511	P	7.16629	P	2.02626	2.02626	up	0	RAT00302	0	mRNA	Rnpep	arginyl aminopeptidase (aminopeptidase B)	NA	NA	NM_031097	NA	NA	NA	NA_x000D_
RAT00310	7.88906	P	6.77869	P	2.15901	2.15901	up	0	RAT00310	0	mRNA	Fam96a	"family with sequence similarity 96, member A"	NA	NA	NM_001008327	NA	NA	NA	NA_x000D_
RAT16934	7.46016	P	6.41618	P	2.06191	2.06191	up	0	RAT16934	0	mRNA	LOC691849	hypothetical protein LOC691849	NA	NA	NM_001198796	NA	NA	NA	NA_x000D_
RAT03731	11.2885	P	10.2155	P	2.10381	2.10381	up	0	RAT03731	0	mRNA	Ces2c	carboxylesterase 2C	NA	NA	NM_133586	NA	NA	NA	NA_x000D_
RAT08371	7.80037	P	6.26876	P	2.89108	2.89108	up	0	RAT08371	0	mRNA	Ina	"internexin neuronal intermediate filament protein, alpha"	NA	NA	NM_019128	NA	NA	NA	NA_x000D_
RAT00392	11.9022	P	10.8914	P	2.015	2.015	up	0	RAT00392	0	mRNA	Erlec1	endoplasmic reticulum lectin 1	NA	NA	NM_001106023	NA	NA	NA	NA_x000D_
RAT19257	13.07	P	11.4202	P	3.13799	3.13799	up	0	RAT19257	0	mRNA	Aldoc	"aldolase C, fructose-bisphosphate"	NA	NA	NM_012497	NA	NA	NA	NA_x000D_
RAT23631	5.41392	P	4.04066	A	2.59057	2.59057	up	0	RAT23631	0	mRNA	Mfsd6l	major facilitator superfamily domain containing 6-like	NA	NA	NM_001105787	NA	NA	NA	NA_x000D_
RAT22343	5.70239	P	3.84315	A	3.62817	3.62817	up	0	RAT22343	0	mRNA	Col15a1	"collagen, type XV, alpha 1"	NA	NA	ENSRNOT00000017217	NA	NA	NA	NA_x000D_
RAT02707	9.92726	P	8.82144	P	2.15221	2.15221	up	0	RAT02707	0	mRNA	Uso1	USO1 vesicle docking protein homolog (yeast)	NA	NA	NM_019379	NA	NA	NA	NA_x000D_
RAT24725	6.39544	P	5.23027	A	2.2426	2.2426	up	0	RAT24725	0	mRNA	Zmat5	"zinc finger, matrin type 5"	NA	NA	ENSRNOT00000010332	NA	NA	NA	NA_x000D_
RAT00375	9.95231	P	8.72338	P	2.34395	2.34395	up	0	RAT00375	0	mRNA	Snx18	sorting nexin 18	NA	NA	NM_001107652	NA	NA	NA	NA_x000D_
RAT10801	8.41368	P	7.3932	P	2.02859	2.02859	up	0	RAT10801	0	mRNA	Rngtt	RNA guanylyltransferase and 5'-phosphatase	NA	NA	NM_001107923	NA	NA	NA	NA_x000D_
RAT10865	5.95438	P	4.77406	A	2.26626	2.26626	up	0	RAT10865	0	mRNA	Tmem144	transmembrane protein 144	NA	NA	NM_001108551	NA	NA	NA	NA_x000D_
RAT01057	14.0263	P	12.7152	P	2.48144	2.48144	up	0	RAT01057	0	mRNA	Glb1	"galactosidase, beta 1"	NA	NA	NM_001108192	NA	NA	NA	NA_x000D_
RAT03748	8.47287	P	6.88872	P	2.99832	2.99832	up	0	RAT03748	0	mRNA	RGD1305007	similar to RIKEN cDNA 1110031I02	NA	NA	NM_001013976	NA	NA	NA	NA_x000D_
RAT06592	5.76965	P	4.13793	A	3.09883	3.09883	up	0	RAT06592	0	mRNA	Ptpro	"protein tyrosine phosphatase, receptor type, O"	NA	NA	NM_017336	NA	NA	NA	NA_x000D_
RAT19412	6.53017	P	5.44184	P	2.12627	2.12627	up	0	RAT19412	0	mRNA	Pet112l	PET112-like (yeast)	NA	NA	ENSRNOT00000057128	NA	NA	NA	NA_x000D_
RAT09536	10.6028	P	9.41572	P	2.27686	2.27686	up	0	RAT09536	0	mRNA	RGD1562344	similar to Gm566 protein	NA	NA	NM_001106459	NA	NA	NA	NA_x000D_
RAT00465	10.4246	P	8.75628	P	3.17847	3.17847	up	0	RAT00465	0	mRNA	Acot1	acyl-CoA thioesterase 1	NA	NA	NM_031315	NA	NA	NA	NA_x000D_
RAT26658	5.90265	P	2.7023	A	9.19188	9.19188	up	0	RAT26658	0	mRNA	Nfia	nuclear factor I/A	NA	NA	NM_012988	NA	NA	NA	NA_x000D_
RAT03084	6.46648	P	4.71553	A	3.36581	3.36581	up	0	RAT03084	0	mRNA	Dsc2	desmocollin 2	NA	NA	NM_001033688	NA	NA	NA	NA_x000D_
RAT02384	5.3676	P	2.70437	A	6.33451	6.33451	up	0	RAT02384	0	mRNA	Arfrp1	ADP-ribosylation factor related protein 1	NA	NA	NM_053980	NA	NA	NA	NA_x000D_
RAT23718	7.66794	P	6.40855	P	2.39394	2.39394	up	0	RAT23718	0	mRNA	Vps13b	vacuolar protein sorting 13 homolog B (yeast)	NA	NA	NM_001134886	NA	NA	NA	NA_x000D_
RAT03660	7.77729	P	6.37251	P	2.64777	2.64777	up	0	RAT03660	0	mRNA	Rnf103	ring finger protein 103	NA	NA	NM_053438	NA	NA	NA	NA_x000D_
RAT10423	9.14984	P	8.02038	P	2.18777	2.18777	up	0	RAT10423	0	mRNA	Iars	isoleucyl-tRNA synthetase	NA	NA	NM_001100572	NA	NA	NA	NA_x000D_
RAT30221	8.10776	P	7.06223	P	2.06412	2.06412	up	0	RAT30221	0	mRNA	Zc3h13	zinc finger CCCH type containing 13	NA	NA	NM_001170471	NA	NA	NA	NA_x000D_
RAT16537	6.84119	P	5.65278	P	2.27901	2.27901	up	0	RAT16537	0	mRNA	Sigmar1	sigma non-opioid intracellular receptor 1	NA	NA	NM_030996	NA	NA	NA	NA_x000D_
RAT02053	6.34754	P	4.4444	A	3.74027	3.74027	up	0	RAT02053	0	mRNA	Klkb1	"kallikrein B, plasma 1"	NA	NA	NM_012725	NA	NA	NA	NA_x000D_
RAT25407	15.0398	P	13.7647	P	2.42016	2.42016	up	0	RAT25407	0	mRNA	Defb2	defensin beta 2	NA	NA	NM_001037507	NA	NA	NA	NA_x000D_
RAT02268	11.0596	P	9.48387	P	2.98079	2.98079	up	0	RAT02268	0	mRNA	Suox	sulfite oxidase	NA	NA	NM_031127	NA	NA	NA	NA_x000D_
RAT04411	6.94337	P	5.43914	P	2.83673	2.83673	up	0	RAT04411	0	mRNA	Tp53inp2	tumor protein p53 inducible nuclear protein 2	NA	NA	XM_001074013	NA	NA	NA	NA_x000D_
RAT00499	9.46339	P	8.1975	P	2.40477	2.40477	up	0	RAT00499	0	mRNA	Dnajb11	"DnaJ (Hsp40) homolog, subfamily B, member 11"	NA	NA	NM_001015021	NA	NA	NA	NA_x000D_
RAT27885	7.51616	P	5.94635	P	2.96866	2.96866	up	0	RAT27885	0	mRNA	Rpp30	ribonuclease P/MRP 30 subunit (human)	NA	NA	NM_001191083	NA	NA	NA	NA_x000D_
RAT24484	9.91333	P	8.85617	P	2.08082	2.08082	up	0	RAT24484	0	mRNA	Adpgk	ADP-dependent glucokinase	NA	NA	NM_001100723	NA	NA	NA	NA_x000D_
RAT09152	6.88696	P	5.2996	A	3.00498	3.00498	up	0	RAT09152	0	mRNA	Ccnd2	cyclin D2	NA	NA	NM_022267	NA	NA	NA	NA_x000D_
RAT24042	13.257	P	12.0064	P	2.37941	2.37941	up	0	RAT24042	0	mRNA	Defb38	defensin beta 38	NA	NA	NM_001037552	NA	NA	NA	NA_x000D_
RAT01258	10.5119	P	9.34557	P	2.24432	2.24432	up	0	RAT01258	0	mRNA	Stk39	serine threonine kinase 39	NA	NA	NM_019362	NA	NA	NA	NA_x000D_
RAT03655	8.21647	P	6.9216	P	2.45355	2.45355	up	0	RAT03655	0	mRNA	Tmco1	transmembrane and coiled-coil domains 1	NA	NA	NM_001009631	NA	NA	NA	NA_x000D_
RAT02563	15.2779	P	14.242	P	2.05042	2.05042	up	0	RAT02563	0	mRNA	Dbi	"diazepam binding inhibitor (GABA receptor modulator, acyl-CoA binding protein)"	NA	NA	NM_031853	NA	NA	NA	NA_x000D_
RAT15057	10.0021	P	8.93065	P	2.10156	2.10156	up	0	RAT15057	0	mRNA	Spcs2	signal peptidase complex subunit 2 homolog (S. cerevisiae)	NA	NA	NM_001191601	NA	NA	NA	NA_x000D_
RAT27662	7.6492	P	6.23471	P	2.66565	2.66565	up	0	RAT27662	0	mRNA	Pigh	"phosphatidylinositol glycan anchor biosynthesis, class H"	NA	NA	NM_001108714	NA	NA	NA	NA_x000D_
RAT09183	5.5348	P	4.51664	A	2.02533	2.02533	up	0	RAT09183	0	mRNA	Prrx1	paired related homeobox 1	NA	NA	NM_153821	NA	NA	NA	NA_x000D_
RAT30036	5.50738	P	3.72842	A	3.43178	3.43178	up	0	RAT30036	0	mRNA	Liph	"lipase, member H"	NA	NA	NM_001044279	NA	NA	NA	NA_x000D_
RAT01228	7.92497	P	6.74536	P	2.26516	2.26516	up	0	RAT01228	0	mRNA	Atl2	atlastin GTPase 2	NA	NA	NM_001100671	NA	NA	NA	NA_x000D_
RAT20873	6.37999	P	5.29251	A	2.12502	2.12502	up	0	RAT20873	0	mRNA	Ccrn4l	CCR4 carbon catabolite repression 4-like (S. cerevisiae)	NA	NA	NM_138526	NA	NA	NA	NA_x000D_
RAT09229	5.60844	P	4.14898	A	2.75004	2.75004	up	0	RAT09229	0	mRNA	Itgb7	"integrin, beta 7"	NA	NA	NM_013171	NA	NA	NA	NA_x000D_
RAT17321	12.6281	P	11.5059	P	2.1767	2.1767	up	0	RAT17321	0	mRNA	RGD1563348	similar to Selenoprotein H	NA	NA	NM_001114939	NA	NA	NA	NA_x000D_
RAT23940	6.69897	P	5.5172	P	2.26855	2.26855	up	0	RAT23940	0	mRNA	Tmem88b	transmembrane protein 88B	NA	NA	NM_001109426	NA	NA	NA	NA_x000D_
RAT22939	7.41359	P	6.11133	P	2.46615	2.46615	up	0	RAT22939	0	mRNA	Cyp4f17	"cytochrome P450, family 4, subfamily f, polypeptide 17"	NA	NA	NM_001191986	NA	NA	NA	NA_x000D_
RAT17309	7.56891	P	6.45886	P	2.15853	2.15853	up	0	RAT17309	0	mRNA	Trappc6b	trafficking protein particle complex 6B	NA	NA	NM_001106733	NA	NA	NA	NA_x000D_
RAT04981	9.3424	P	8.08618	P	2.38869	2.38869	up	0	RAT04981	0	mRNA	Echdc3	enoyl Coenzyme A hydratase domain containing 3	NA	NA	NM_001101010	NA	NA	NA	NA_x000D_
RAT25258	14.4695	P	12.72	P	3.36226	3.36226	up	0	RAT25258	0	mRNA	Tmed6	transmembrane emp24 protein transport domain containing 6	NA	NA	NM_001106183	NA	NA	NA	NA_x000D_
RAT06335	7.66187	P	6.42945	P	2.3496	2.3496	up	0	RAT06335	0	mRNA	Pxmp4	peroxisomal membrane protein 4	NA	NA	NM_172223	NA	NA	NA	NA_x000D_
RAT10900	6.50846	P	4.85794	A	3.13947	3.13947	up	0	RAT10900	0	mRNA	Abhd13	abhydrolase domain containing 13	NA	NA	NM_001107327	NA	NA	NA	NA_x000D_
RAT21868	8.58063	P	7.48302	P	2.13999	2.13999	up	0	RAT21868	0	mRNA	Hoga1	4-hydroxy-2-oxoglutarate aldolase 1	NA	NA	NM_001106355	NA	NA	NA	NA_x000D_
RAT10996	8.21073	P	7.19046	P	2.0283	2.0283	up	0	RAT10996	0	mRNA	Grhl2	grainyhead-like 2 (Drosophila)	NA	NA	NM_001134527	NA	NA	NA	NA_x000D_
RAT01171	8.53177	P	7.49136	P	2.05681	2.05681	up	0	RAT01171	0	mRNA	Gnpda1	glucosamine-6-phosphate deaminase 1	NA	NA	NM_001134995	NA	NA	NA	NA_x000D_
RAT29102	5.37461	P	3.89114	A	2.79621	2.79621	up	0	RAT29102	0	mRNA	Cask	calcium/calmodulin-dependent serine protein kinase (MAGUK family)	NA	NA	NM_022184	NA	NA	NA	NA_x000D_
RAT14158	7.40414	P	5.9549	P	2.73064	2.73064	up	0	RAT14158	0	mRNA	Fam18b2	"family with sequence similarity 18, member B2"	NA	NA	NM_001107568	NA	NA	NA	NA_x000D_
RAT03953	10.3692	P	8.66876	P	3.25004	3.25004	up	0	RAT03953	0	mRNA	Hspa1b	heat shock 70kD protein 1B (mapped)	NA	NA	NM_212504	NA	NA	NA	NA_x000D_
RAT00670	11.3691	P	10.3459	P	2.03252	2.03252	up	0	RAT00670	0	mRNA	Lsm6	"LSM6 homolog, U6 small nuclear RNA associated (S. cerevisiae)"	NA	NA	NM_001126085	NA	NA	NA	NA_x000D_
RAT03456	10.4118	P	9.40886	P	2.0041	2.0041	up	0	RAT03456	0	mRNA	LOC300024	similar to Ly6-B antigen gene	NA	NA	ENSRNOT00000043055	NA	NA	NA	NA_x000D_
RAT05107	7.37296	P	6.16985	P	2.30234	2.30234	up	0	RAT05107	0	mRNA	Utp18	"UTP18, small subunit (SSU) processome component, homolog (yeast)"	NA	NA	NM_001135039	NA	NA	NA	NA_x000D_
RAT21560	6.88153	P	5.68315	P	2.29482	2.29482	up	0	RAT21560	0	mRNA	Utp15	"UTP15, U3 small nucleolar ribonucleoprotein, homolog (S. cerevisiae)"	NA	NA	NM_001107647	NA	NA	NA	NA_x000D_
RAT09658	9.67731	P	8.26548	P	2.66075	2.66075	up	0	RAT09658	0	mRNA	Bpnt1	"3'(2'), 5'-bisphosphate nucleotidase 1"	NA	NA	NM_171990	NA	NA	NA	NA_x000D_
RAT17717	6.051	P	4.70843	A	2.53604	2.53604	up	0	RAT17717	0	mRNA	Nlrp1b	"NLR family, pyrin domain containing 1B"	NA	NA	XM_001080760	NA	NA	NA	NA_x000D_
RAT16716	5.71118	P	4.65111	A	2.08504	2.08504	up	0	RAT16716	0	mRNA	Fn3k	fructosamine 3 kinase	NA	NA	NM_001109051	NA	NA	NA	NA_x000D_
RAT28944	8.96682	P	7.66352	P	2.46793	2.46793	up	0	RAT28944	0	mRNA	Slco4a1	"solute carrier organic anion transporter family, member 4a1"	NA	NA	NM_133608	NA	NA	NA	NA_x000D_
RAT04498	13.5342	P	12.1382	P	2.63158	2.63158	up	0	RAT04498	0	mRNA	Hexb	hexosaminidase B	NA	NA	NM_001011946	NA	NA	NA	NA_x000D_
RAT03834	7.69356	P	6.31946	P	2.59206	2.59206	up	0	RAT03834	0	mRNA	Uxs1	UDP-glucuronate decarboxylase 1	NA	NA	NM_139336	NA	NA	NA	NA_x000D_
RAT26696	5.99715	P	3.64358	A	5.11089	5.11089	up	0	RAT26696	0	mRNA	Hpn	hepsin	NA	NA	NM_017112	NA	NA	NA	NA_x000D_
RAT13518	7.22177	P	5.51333	P	3.26807	3.26807	up	0	RAT13518	0	mRNA	Hepacam2	HEPACAM family member 2	NA	NA	NM_001106580	NA	NA	NA	NA_x000D_
RAT05660	6.2233	P	4.89785	A	2.50611	2.50611	up	0	RAT05660	0	mRNA	Kremen1	kringle containing transmembrane protein 1	NA	NA	NM_053649	NA	NA	NA	NA_x000D_
RAT14594	6.95383	P	5.88636	P	2.09576	2.09576	up	0	RAT14594	0	mRNA	Etaa1	Ewing tumor-associated antigen 1	NA	NA	NM_001109094	NA	NA	NA	NA_x000D_
RAT03578	10.8532	P	9.44113	P	2.66112	2.66112	up	0	RAT03578	0	mRNA	Steap1	six transmembrane epithelial antigen of the prostate 1	NA	NA	NM_001106629	NA	NA	NA	NA_x000D_
RAT06910	7.2855	P	5.71351	P	2.97316	2.97316	up	0	RAT06910	0	mRNA	LOC685888	hypothetical protein LOC685888	NA	NA	XR_085909	NA	NA	NA	NA_x000D_
RAT00459	5.66807	P	2.71909	A	7.72203	7.72203	up	0	RAT00459	0	mRNA	Myoc	myocilin	NA	NA	NM_030865	NA	NA	NA	NA_x000D_
RAT10483	5.9753	P	4.58111	A	2.62841	2.62841	up	0	RAT10483	0	mRNA	RGD1561145	similar to novel protein	NA	NA	NM_001134605	NA	NA	NA	NA_x000D_
RAT05471	5.96488	P	4.68343	A	2.43084	2.43084	up	0	RAT05471	0	mRNA	Tmem30b	transmembrane protein 30B	NA	NA	NM_001080380	NA	NA	NA	NA_x000D_
RAT30057	6.37986	P	4.40956	A	3.9185	3.9185	up	0	RAT30057	0	mRNA	Gzmc	granzyme C	NA	NA	NM_134332	NA	NA	NA	NA_x000D_
RAT18045	7.71672	P	6.69546	P	2.02969	2.02969	up	0	RAT18045	0	mRNA	Nt5c3	"5'-nucleotidase, cytosolic III"	NA	NA	NM_001107862	NA	NA	NA	NA_x000D_
RAT25546	10.3358	P	9.24709	P	2.12684	2.12684	up	0	RAT25546	0	mRNA	Txndc17	thioredoxin domain containing 17	NA	NA	NM_001105805	NA	NA	NA	NA_x000D_
RAT22352	7.26271	P	5.63187	P	3.09694	3.09694	up	0	RAT22352	0	mRNA	Hsd17b7	hydroxysteroid (17-beta) dehydrogenase 7	NA	NA	NM_017235	NA	NA	NA	NA_x000D_
RAT18099	5.33059	P	2.59811	A	6.64596	6.64596	up	0	RAT18099	0	mRNA	LOC498664	similar to hypothetical protein MGC35169	NA	NA	NM_001017508	NA	NA	NA	NA_x000D_
RAT29863	5.88321	P	4.31777	A	2.95968	2.95968	up	0	RAT29863	0	mRNA	Kifc1	kinesin family member C1	NA	NA	NM_001005878	NA	NA	NA	NA_x000D_
RAT05979	6.70172	P	5.28394	A	2.67174	2.67174	up	0	RAT05979	0	mRNA	Pigc	"phosphatidylinositol glycan anchor biosynthesis, class C"	NA	NA	NM_001012207	NA	NA	NA	NA_x000D_
RAT05468	8.8877	P	7.74418	P	2.2092	2.2092	up	0	RAT05468	0	mRNA	Tpst2	tyrosylprotein sulfotransferase 2	NA	NA	NM_001008508	NA	NA	NA	NA_x000D_
RAT06616	7.25382	P	6.0917	P	2.23785	2.23785	up	0	RAT06616	0	mRNA	Pvrl2	poliovirus receptor-related 2	NA	NA	NM_001012064	NA	NA	NA	NA_x000D_
RAT08431	8.32316	P	7.15868	P	2.24151	2.24151	up	0	RAT08431	0	mRNA	Pgm3	phosphoglucomutase 3	NA	NA	BC166838	NA	NA	NA	NA_x000D_
RAT10799	7.5361	P	6.37106	P	2.24239	2.24239	up	0	RAT10799	0	mRNA	Tmem161b	transmembrane protein 161B	NA	NA	XM_226652	NA	NA	NA	NA_x000D_
RAT03484	5.91564	P	4.86237	A	2.07522	2.07522	up	0	RAT03484	0	mRNA	Dnajc12	"DnaJ (Hsp40) homolog, subfamily C, member 12"	NA	NA	NM_001034032	NA	NA	NA	NA_x000D_
RAT07104	7.94265	P	6.69882	P	2.36827	2.36827	up	0	RAT07104	0	mRNA	RGD1308706	similar to RIKEN cDNA 4921524J17	NA	NA	NM_001134421	NA	NA	NA	NA_x000D_
RAT10394	8.78037	P	7.54706	P	2.35105	2.35105	up	0	RAT10394	0	mRNA	8-Mar	membrane-associated ring finger (C3HC4) 8	NA	NA	NM_001107882	NA	NA	NA	NA_x000D_
RAT05631	9.13802	P	7.93061	P	2.30922	2.30922	up	0	RAT05631	0	mRNA	Nt5e	"5' nucleotidase, ecto"	NA	NA	NM_021576	NA	NA	NA	NA_x000D_
RAT04926	9.46903	P	8.22986	P	2.36063	2.36063	up	0	RAT04926	0	mRNA	Ttyh3	tweety homolog 3 (Drosophila)	NA	NA	NM_001107124	NA	NA	NA	NA_x000D_
RAT25184	6.45746	P	4.96709	A	2.80961	2.80961	up	0	RAT25184	0	mRNA	Myh13	"myosin, heavy chain 13, skeletal muscle"	NA	NA	ENSRNOT00000055257	NA	NA	NA	NA_x000D_
RAT00428	7.77451	P	6.62664	P	2.21586	2.21586	up	0	RAT00428	0	mRNA	Ppp2r3a	"protein phosphatase 2, regulatory subunit B'', alpha"	NA	NA	NM_001012202	NA	NA	NA	NA_x000D_
RAT03780	6.71638	P	5.28497	A	2.6971	2.6971	up	0	RAT03780	0	mRNA	Cma1	"chymase 1, mast cell"	NA	NA	NM_013092	NA	NA	NA	NA_x000D_
RAT15010	7.37345	P	4.43872	A	7.64613	7.64613	up	0	RAT15010	0	mRNA	Pate4	prostate and testis expressed 4	NA	NA	NM_001108757	NA	NA	NA	NA_x000D_
RAT00362	9.60667	P	8.47685	P	2.18831	2.18831	up	0	RAT00362	0	mRNA	Sdhc	"succinate dehydrogenase complex, subunit C, integral membrane protein"	NA	NA	NM_001005534	NA	NA	NA	NA_x000D_
RAT08798	5.82948	P	4.57019	A	2.39378	2.39378	up	0	RAT08798	0	mRNA	Jag1	jagged 1	NA	NA	NM_019147	NA	NA	NA	NA_x000D_
RAT02668	7.54972	P	6.47634	P	2.10435	2.10435	up	0	RAT02668	0	mRNA	Atp5g3	"ATP synthase, H+ transporting, mitochondrial Fo complex, subunit C3 (subunit 9)"	NA	NA	NM_053756	NA	NA	NA	NA_x000D_
RAT10750	5.48896	P	4.2396	A	2.37735	2.37735	up	0	RAT10750	0	mRNA	Zfyve20	"zinc finger, FYVE domain containing 20"	NA	NA	NM_001107875	NA	NA	NA	NA_x000D_
RAT02577	11.147	P	10.0615	P	2.12208	2.12208	up	0	RAT02577	0	mRNA	RGD1305045	similar to hypothetical protein	NA	NA	NM_001106496	NA	NA	NA	NA_x000D_
RAT09278	13.1426	P	11.709	P	2.7012	2.7012	up	0	RAT09278	0	mRNA	RGD1565459	similar to ribosomal protein L10a	NA	NA	ENSRNOT00000042056	NA	NA	NA	NA_x000D_
RAT25353	9.16414	P	7.89253	P	2.41432	2.41432	up	0	RAT25353	0	mRNA	Psapl1	prosaposin-like 1	NA	NA	NM_001144850	NA	NA	NA	NA_x000D_
RAT03745	9.12118	P	7.95684	P	2.24131	2.24131	up	0	RAT03745	0	mRNA	C1galt1c1	C1GALT1-specific chaperone 1	NA	NA	NM_001030033	NA	NA	NA	NA_x000D_
RAT28578	7.28499	P	5.3201	P	3.90381	3.90381	up	0	RAT28578	0	mRNA	Mcpt10	mast cell protease 10	NA	NA	NM_017146	NA	NA	NA	NA_x000D_
RAT07071	6.05826	P	4.95503	A	2.14835	2.14835	up	0	RAT07071	0	mRNA	Fam91a1	"family with sequence similarity 91, member A1"	NA	NA	NM_001127578	NA	NA	NA	NA_x000D_
RAT02739	11.6806	P	10.6667	P	2.0194	2.0194	up	0	RAT02739	0	mRNA	Tpmt	thiopurine S-methyltransferase	NA	NA	ENSRNOT00000022085	NA	NA	NA	NA_x000D_
RAT29926	8.50144	P	7.49551	P	2.00824	2.00824	up	0	RAT29926	0	mRNA	Tbrg1	transforming growth factor beta regulator 1	NA	NA	NM_001009344	NA	NA	NA	NA_x000D_
RAT23574	5.47613	P	2.54112	A	7.64762	7.64762	up	0	RAT23574	0	mRNA	Defa11	defensin alpha 11	NA	NA	NM_001033078	NA	NA	NA	NA_x000D_
RAT29117	8.94735	P	7.93711	P	2.01424	2.01424	up	0	RAT29117	0	mRNA	Strbp	spermatid perinuclear RNA binding protein	NA	NA	NM_053416	NA	NA	NA	NA_x000D_
RAT02831	7.84199	P	6.80288	P	2.05496	2.05496	up	0	RAT02831	0	mRNA	RGD1559786	similar to RIKEN cDNA 0610037L13	NA	NA	NM_001034132	NA	NA	NA	NA_x000D_
RAT14446	10.0331	P	8.72651	P	2.47359	2.47359	up	0	RAT14446	0	mRNA	Hacl1	2-hydroxyacyl-CoA lyase 1	NA	NA	NM_053493	NA	NA	NA	NA_x000D_
RAT04304	7.48021	P	6.06499	P	2.66699	2.66699	up	0	RAT04304	0	mRNA	Mrpl50	mitochondrial ribosomal protein L50	NA	NA	NM_001108665	NA	NA	NA	NA_x000D_
RAT02548	9.79036	P	8.42216	P	2.5815	2.5815	up	0	RAT02548	0	mRNA	Pou2af1	POU class 2 associating factor 1	NA	NA	NM_001109599	NA	NA	NA	NA_x000D_
RAT01080	11.638	P	10.5212	P	2.16868	2.16868	up	0	RAT01080	0	mRNA	Acp1	"acid phosphatase 1, soluble"	NA	NA	NM_021262	NA	NA	NA	NA_x000D_
RAT08450	6.95162	P	5.69292	P	2.3928	2.3928	up	0	RAT08450	0	mRNA	RGD1307704	similar to RIKEN cDNA 2410016O06	NA	NA	NM_001108040	NA	NA	NA	NA_x000D_
RAT06559	6.05561	P	4.70235	A	2.55489	2.55489	up	0	RAT06559	0	mRNA	Caps2	calcyphosine 2	NA	NA	NM_001108990	NA	NA	NA	NA_x000D_
RAT19295	9.5855	P	7.58396	P	4.00428	4.00428	up	0	RAT19295	0	mRNA	Cryl1	"crystallin, lambda 1"	NA	NA	NM_175757	NA	NA	NA	NA_x000D_
RAT27782	6.49433	P	3.17579	A	9.9765	9.9765	up	0	RAT27782	0	mRNA	Ghrhr	growth hormone releasing hormone receptor	NA	NA	NM_012850	NA	NA	NA	NA_x000D_
RAT00432	6.40458	P	5.36596	P	2.05427	2.05427	up	0	RAT00432	0	mRNA	Tmem33	transmembrane protein 33	NA	NA	NM_021671	NA	NA	NA	NA_x000D_
RAT17213	5.74128	P	4.54608	A	2.28976	2.28976	up	0	RAT17213	0	mRNA	Dph2	DPH2 homolog (S. cerevisiae)	NA	NA	NM_001015007	NA	NA	NA	NA_x000D_
RAT10501	9.61779	P	7.75063	P	3.64814	3.64814	up	0	RAT10501	0	mRNA	Cd177	CD177 molecule	NA	NA	NM_001191948	NA	NA	NA	NA_x000D_
RAT11432	6.40221	P	5.33608	P	2.09381	2.09381	up	0	RAT11432	0	mRNA	Rabl3	"RAB, member of RAS oncogene family-like 3"	NA	NA	NM_001108319	NA	NA	NA	NA_x000D_
RAT10807	8.60332	P	7.28312	P	2.49702	2.49702	up	0	RAT10807	0	mRNA	Vav3	vav 3 guanine nucleotide exchange factor	NA	NA	NM_001191714	NA	NA	NA	NA_x000D_
RAT15208	11.2567	P	10.2067	P	2.07055	2.07055	up	0	RAT15208	0	mRNA	RGD1563216	similar to HESB like domain containing 1	NA	NA	NM_001109278	NA	NA	NA	NA_x000D_
RAT26443	6.90163	P	5.62332	P	2.42554	2.42554	up	0	RAT26443	0	mRNA	Sema4d	"sema domain, immunoglobulin domain (Ig), transmembrane domain (TM) and short cytoplasmic domain, (semaphorin) 4D"	NA	NA	NM_001170563	NA	NA	NA	NA_x000D_
RAT26630	11.688	P	10.6865	P	2.00209	2.00209	up	0	RAT26630	0	mRNA	Defb42	defensin beta 42	NA	NA	NM_001037532	NA	NA	NA	NA_x000D_
RAT02094	9.50916	P	8.36069	P	2.21678	2.21678	up	0	RAT02094	0	mRNA	Ppp1cb	"protein phosphatase 1, catalytic subunit, beta isozyme"	NA	NA	NM_013065	NA	NA	NA	NA_x000D_
RAT01851	7.74653	P	6.61863	P	2.18541	2.18541	up	0	RAT01851	0	mRNA	Pdcd2	programmed cell death 2	NA	NA	NM_031638	NA	NA	NA	NA_x000D_
RAT00515	7.48363	P	5.92117	P	2.95357	2.95357	up	0	RAT00515	0	mRNA	Gmcl1	germ cell-less homolog 1 (Drosophila)	NA	NA	NM_001033931	NA	NA	NA	NA_x000D_
RAT01187	8.50698	P	7.46193	P	2.06344	2.06344	up	0	RAT01187	0	mRNA	Cmtm8	CKLF-like MARVEL transmembrane domain containing 8	NA	NA	NM_198754	NA	NA	NA	NA_x000D_
RAT05544	7.91243	P	6.73707	P	2.2585	2.2585	up	0	RAT05544	0	mRNA	Aga	aspartylglucosaminidase	NA	NA	NM_001031641	NA	NA	NA	NA_x000D_
RAT29311	7.4591	P	6.35145	P	2.15493	2.15493	up	0	RAT29311	0	mRNA	ST7	suppression of tumorigenicity 7	NA	NA	NM_001004102	NA	NA	NA	NA_x000D_
RAT07399	10.3537	P	8.94581	P	2.65346	2.65346	up	0	RAT07399	0	mRNA	Glb1	"galactosidase, beta 1"	NA	NA	NM_001108192	NA	NA	NA	NA_x000D_
RAT12603	6.80697	P	5.39358	P	2.66362	2.66362	up	0	RAT12603	0	mRNA	Tmcc2	transmembrane and coiled-coil domain family 2	NA	NA	ENSRNOT00000000036	NA	NA	NA	NA_x000D_
RAT04924	6.43271	P	4.87891	A	2.93589	2.93589	up	0	RAT04924	0	mRNA	Tmem220	transmembrane protein 220	NA	NA	ENSRNOT00000004516	NA	NA	NA	NA_x000D_
RAT04284	6.09353	P	4.45861	A	3.10571	3.10571	up	0	RAT04284	0	mRNA	Slc12a9	"solute carrier family 12 (potassium/chloride transporters), member 9"	NA	NA	NM_134405	NA	NA	NA	NA_x000D_
RAT10403	7.00363	P	6.00036	P	2.00454	2.00454	up	0	RAT10403	0	mRNA	RGD1308430	similar to 1700123O20Rik protein	NA	NA	NM_001108376	NA	NA	NA	NA_x000D_
RAT21742	7.53175	P	5.48844	P	4.12192	4.12192	up	0	RAT21742	0	mRNA	RGD1310727	LOC363070	NA	NA	NM_001108764	NA	NA	NA	NA_x000D_
RAT06218	8.36297	P	7.17205	P	2.28299	2.28299	up	0	RAT06218	0	mRNA	Stap1	signal transducing adaptor family member 1	NA	NA	NM_001025115	NA	NA	NA	NA_x000D_
RAT18638	9.59613	P	7.69287	P	3.74056	3.74056	up	0	RAT18638	0	mRNA	Gpc2	glypican 2	NA	NA	NM_138511	NA	NA	NA	NA_x000D_
RAT04373	9.26948	P	7.73161	P	2.90364	2.90364	up	0	RAT04373	0	mRNA	Pldn	pallidin homolog (mouse)	NA	NA	NM_001025714	NA	NA	NA	NA_x000D_
RAT08795	7.67388	P	6.58996	P	2.1198	2.1198	up	0	RAT08795	0	mRNA	RGD1308127	similar to 2700078E11Rik protein	NA	NA	NM_001014248	NA	NA	NA	NA_x000D_
RAT30322	7.92105	P	5.56502	P	5.11958	5.11958	up	0	RAT30322	0	mRNA	Fcgbp	Fc fragment of IgG binding protein	NA	NA	NM_001164657	NA	NA	NA	NA_x000D_
RAT06552	7.56	P	6.38366	P	2.26003	2.26003	up	0	RAT06552	0	mRNA	Slc39a7	"solute carrier family 39 (zinc transporter), member 7"	NA	NA	NM_001008885	NA	NA	NA	NA_x000D_
RAT09801	8.87816	P	7.53684	P	2.53383	2.53383	up	0	RAT09801	0	mRNA	RGD1560208	similar to Farnesyl pyrophosphate synthetase (FPP synthetase)	NA	NA	XM_227370	NA	NA	NA	NA_x000D_
RAT24858	18.2949	P	17.1952	P	2.14317	2.14317	up	0	RAT24858	0	mRNA	Wfdc10	WAP four-disulfide core domain 10	NA	NA	NM_001109461	NA	NA	NA	NA_x000D_
RAT10920	6.44306	P	5.27279	P	2.25055	2.25055	up	0	RAT10920	0	mRNA	Mum1l1	melanoma associated antigen (mutated) 1-like 1	NA	NA	NM_001109321	NA	NA	NA	NA_x000D_
RAT08507	8.3982	P	7.03881	P	2.56578	2.56578	up	0	RAT08507	0	mRNA	Tmem128	transmembrane protein 128	NA	NA	NM_001108362	NA	NA	NA	NA_x000D_
RAT00096	7.03003	P	5.37389	A	3.15172	3.15172	up	0	RAT00096	0	mRNA	Kif16b	kinesin family member 16B	NA	NA	NM_001107783	NA	NA	NA	NA_x000D_
RAT07825	8.97256	P	7.90319	P	2.09851	2.09851	up	0	RAT07825	0	mRNA	Glul	glutamate-ammonia ligase	NA	NA	NM_017073	NA	NA	NA	NA_x000D_
RAT05401	8.80786	P	7.70847	P	2.14264	2.14264	up	0	RAT05401	0	mRNA	Celsr3	"cadherin, EGF LAG seven-pass G-type receptor 3 (flamingo homolog, Drosophila)"	NA	NA	NM_031320	NA	NA	NA	NA_x000D_
RAT27825	7.86325	P	6.66911	P	2.28809	2.28809	up	0	RAT27825	0	mRNA	Maoa	monoamine oxidase A	NA	NA	NM_033653	NA	NA	NA	NA_x000D_
RAT22151	10.6525	P	9.20603	P	2.72532	2.72532	up	0	RAT22151	0	mRNA	Atxn10	ataxin 10	NA	NA	NM_133313	NA	NA	NA	NA_x000D_
RAT06844	8.48794	P	7.39415	P	2.13434	2.13434	up	0	RAT06844	0	mRNA	Polr3k	polymerase (RNA) III (DNA directed) polypeptide K	NA	NA	NM_001014259	NA	NA	NA	NA_x000D_
RAT21527	9.33665	P	7.66143	P	3.19367	3.19367	up	0	RAT21527	0	mRNA	Lsm6	"LSM6 homolog, U6 small nuclear RNA associated (S. cerevisiae)"	NA	NA	NM_001126085	NA	NA	NA	NA_x000D_
RAT06783	5.34031	P	4.26711	A	2.10409	2.10409	up	0	RAT06783	0	mRNA	P2ry14	"purinergic receptor P2Y, G-protein coupled, 14"	NA	NA	NM_133577	NA	NA	NA	NA_x000D_
RAT07011	6.06647	P	2.6369	A	10.7747	10.7747	up	0	RAT07011	0	mRNA	LOC684996	similar to chromosome 7 open reading frame 11	NA	NA	NM_001109452	NA	NA	NA	NA_x000D_
RAT04254	8.34937	P	6.87184	P	2.78472	2.78472	up	0	RAT04254	0	mRNA	Asah1	N-acylsphingosine amidohydrolase (acid ceramidase) 1	NA	NA	NM_053407	NA	NA	NA	NA_x000D_
RAT03972	6.92108	P	5.90073	P	2.02841	2.02841	up	0	RAT03972	0	mRNA	Nudt19	nudix (nucleoside diphosphate linked moiety X)-type motif 19	NA	NA	NM_001004258	NA	NA	NA	NA_x000D_
RAT01950	9.90864	P	8.32785	P	2.99133	2.99133	up	0	RAT01950	0	mRNA	Cmbl	carboxymethylenebutenolidase homolog (Pseudomonas)	NA	NA	NM_001008770	NA	NA	NA	NA_x000D_
RAT27052	7.39022	P	6.0289	P	2.5692	2.5692	up	0	RAT27052	0	mRNA	Psmd3	"proteasome (prosome, macropain) 26S subunit, non-ATPase, 3"	NA	NA	NM_001008281	NA	NA	NA	NA_x000D_
RAT24650	9.99451	P	8.47124	P	2.87441	2.87441	up	0	RAT24650	0	mRNA	Ces1e	carboxylesterase 1E	NA	NA	NM_031565	NA	NA	NA	NA_x000D_
RAT01905	13.52	P	11.7975	P	3.30021	3.30021	up	0	RAT01905	0	mRNA	Tspan1	tetraspanin 1	NA	NA	NM_001004236	NA	NA	NA	NA_x000D_
RAT21284	6.10198	P	4.6886	A	2.66361	2.66361	up	0	RAT21284	0	mRNA	Actr6	ARP6 actin-related protein 6 homolog (yeast)	NA	NA	NM_001108081	NA	NA	NA	NA_x000D_
RAT07456	12.4781	P	11.1371	P	2.53318	2.53318	up	0	RAT07456	0	mRNA	Sectm1a	secreted and transmembrane 1A	NA	NA	NM_001013043	NA	NA	NA	NA_x000D_
RAT20693	7.7265	P	6.26767	P	2.74884	2.74884	up	0	RAT20693	0	mRNA	Map3k1	mitogen activated protein kinase kinase kinase 1	NA	NA	NM_053887	NA	NA	NA	NA_x000D_
RAT06950	8.21128	P	6.32958	P	3.68509	3.68509	up	0	RAT06950	0	mRNA	Hmgcr	3-hydroxy-3-methylglutaryl-CoA reductase	NA	NA	NM_013134	NA	NA	NA	NA_x000D_
RAT05493	5.8702	P	4.12019	A	3.36361	3.36361	up	0	RAT05493	0	mRNA	Mlc1	megalencephalic leukoencephalopathy with subcortical cysts 1 homolog (human)	NA	NA	NM_001108105	NA	NA	NA	NA_x000D_
RAT11566	7.28983	P	5.64243	P	3.13267	3.13267	up	0	RAT11566	0	mRNA	Mmp2	matrix metallopeptidase 2	NA	NA	NM_031054	NA	NA	NA	NA_x000D_
RAT28574	8.95875	P	7.94037	P	2.02565	2.02565	up	0	RAT28574	0	mRNA	LOC500354	similar to C030030A07Rik protein	NA	NA	NM_001037797	NA	NA	NA	NA_x000D_
RAT04472	11.8335	P	10.4712	P	2.57089	2.57089	up	0	RAT04472	0	mRNA	Crabp2	cellular retinoic acid binding protein 2	NA	NA	NM_017244	NA	NA	NA	NA_x000D_
RAT10676	6.26853	P	5.12572	A	2.20811	2.20811	up	0	RAT10676	0	mRNA	Cox11	COX11 cytochrome c oxidase assembly homolog (yeast)	NA	NA	NM_001109575	NA	NA	NA	NA_x000D_
RAT09445	5.97518	P	2.78483	A	9.12831	9.12831	up	0	RAT09445	0	mRNA	Cables2	Cdk5 and Abl enzyme substrate 2	NA	NA	ENSRNOT00000008279	NA	NA	NA	NA_x000D_
RAT06292	5.37439	P	4.21444	A	2.2345	2.2345	up	0	RAT06292	0	mRNA	Sp6	Sp6 transcription factor	NA	NA	NM_001108833	NA	NA	NA	NA_x000D_
RAT12802	10.3272	P	9.30799	P	2.02675	2.02675	up	0	RAT12802	0	mRNA	Slc39a4l	"solute carrier family 39 (zinc transporter), member 4-like"	NA	NA	NM_001101021	NA	NA	NA	NA_x000D_
RAT21257	16.4039	P	14.3567	P	4.13296	4.13296	up	0	RAT21257	0	mRNA	LOC690319	similar to Alpha-1-antitrypsin-related protein precursor	NA	NA	XM_001074075	NA	NA	NA	NA_x000D_
RAT00125	7.91021	P	6.88835	P	2.03053	2.03053	up	0	RAT00125	0	mRNA	Ttc7b	tetratricopeptide repeat domain 7B	NA	NA	NM_001108719	NA	NA	NA	NA_x000D_
RAT20991	9.77162	P	8.70313	P	2.09723	2.09723	up	0	RAT20991	0	mRNA	Snn	stannin	NA	NA	NM_001034083	NA	NA	NA	NA_x000D_
RAT01088	7.69089	P	6.21133	P	2.78863	2.78863	up	0	RAT01088	0	mRNA	Vipr1	vasoactive intestinal peptide receptor 1	NA	NA	NM_012685	NA	NA	NA	NA_x000D_
RAT12581	7.92624	P	6.47248	P	2.7392	2.7392	up	0	RAT12581	0	mRNA	Slc25a13	"solute carrier family 25, member 13 (citrin)"	NA	NA	ENSRNOT00000013817	NA	NA	NA	NA_x000D_
RAT12229	8.65518	P	7.54192	P	2.16333	2.16333	up	0	RAT12229	0	mRNA	Cesl1	carboxylesterase-like 1	NA	NA	NM_001024365	NA	NA	NA	NA_x000D_
RAT13415	6.21372	P	5.12688	A	2.12409	2.12409	up	0	RAT13415	0	mRNA	Utp6	"UTP6, small subunit (SSU) processome component, homolog (yeast)"	NA	NA	XM_002724525	NA	NA	NA	NA_x000D_
RAT20879	5.86795	P	4.85026	A	2.02468	2.02468	up	0	RAT20879	0	mRNA	Myh8	"myosin, heavy chain 8, skeletal muscle, perinatal"	NA	NA	NM_001100485	NA	NA	NA	NA_x000D_
RAT21318	6.21694	P	4.78629	A	2.6957	2.6957	up	0	RAT21318	0	mRNA	Ttc9	tetratricopeptide repeat domain 9	NA	NA	NM_001134731	NA	NA	NA	NA_x000D_
RAT03335	8.06838	P	6.71261	P	2.55934	2.55934	up	0	RAT03335	0	mRNA	Nsdhl	NAD(P) dependent steroid dehydrogenase-like	NA	NA	NM_001009399	NA	NA	NA	NA_x000D_
RAT15930	8.07344	P	6.89364	P	2.26545	2.26545	up	0	RAT15930	0	mRNA	Paqr3	progestin and adipoQ receptor family member III	NA	NA	NM_001012033	NA	NA	NA	NA_x000D_
RAT09147	7.91913	P	6.80689	P	2.16181	2.16181	up	0	RAT09147	0	mRNA	Pla2g4a	"phospholipase A2, group IVA (cytosolic, calcium-dependent)"	NA	NA	NM_133551	NA	NA	NA	NA_x000D_
RAT21212	6.07165	P	2.77138	A	9.85099	9.85099	up	0	RAT21212	0	mRNA	RGD1562011	"similar to MAS-related G-protein coupled receptor, member G"	NA	NA	XM_001066085	NA	NA	NA	NA_x000D_
RAT20260	5.39911	P	3.66554	A	3.3255	3.3255	up	0	RAT20260	0	mRNA	Csrnp2	cysteine-serine-rich nuclear protein 2	NA	NA	NM_001108113	NA	NA	NA	NA_x000D_
RAT06968	5.47519	P	4.3374	A	2.20044	2.20044	up	0	RAT06968	0	mRNA	RGD1304827	hypothetical LOC316091	NA	NA	NM_001009437	NA	NA	NA	NA_x000D_
RAT21771	6.0866	P	4.39363	A	3.2332	3.2332	up	0	RAT21771	0	mRNA	Slc46a2	"solute carrier family 46, member 2"	NA	NA	NM_001106652	NA	NA	NA	NA_x000D_
RAT16171	10.6263	P	9.45484	P	2.25245	2.25245	up	0	RAT16171	0	mRNA	Comt	catechol-O-methyltransferase	NA	NA	NM_012531	NA	NA	NA	NA_x000D_
RAT09685	10.9032	P	9.76554	P	2.2003	2.2003	up	0	RAT09685	0	mRNA	LOC683077	"similar to praja1, RING-H2 motif containing"	NA	NA	NM_001101006	NA	NA	NA	NA_x000D_
RAT07381	8.70386	P	7.51747	P	2.27582	2.27582	up	0	RAT07381	0	mRNA	Ssr1	"signal sequence receptor, alpha"	NA	NA	NM_001008891	NA	NA	NA	NA_x000D_
RAT27159	8.67571	P	7.52859	P	2.21471	2.21471	up	0	RAT27159	0	mRNA	Alg9	"asparagine-linked glycosylation 9, alpha-1,2-mannosyltransferase homolog (S. cerevisiae)"	NA	NA	NM_001109000	NA	NA	NA	NA_x000D_
RAT28698	5.4381	P	2.4911	A	7.71143	7.71143	up	0	RAT28698	0	mRNA	Grin3a	"glutamate receptor, ionotropic, N-methyl-D-aspartate 3A"	NA	NA	NM_138546	NA	NA	NA	NA_x000D_
RAT03691	10.7128	P	9.22033	P	2.81374	2.81374	up	0	RAT03691	0	mRNA	Depdc7	DEP domain containing 7	NA	NA	NM_001029916	NA	NA	NA	NA_x000D_
RAT03850	5.72373	P	4.29975	A	2.68325	2.68325	up	0	RAT03850	0	mRNA	Ncam2	neural cell adhesion molecule 2	NA	NA	NM_203409	NA	NA	NA	NA_x000D_
RAT02949	5.87272	P	4.75418	A	2.17127	2.17127	up	0	RAT02949	0	mRNA	Ikbip	IKBKB interacting protein	NA	NA	ENSRNOT00000010929	NA	NA	NA	NA_x000D_
RAT08748	6.9504	P	5.44599	P	2.83708	2.83708	up	0	RAT08748	0	mRNA	Kcnj13	"potassium inwardly-rectifying channel, subfamily J, member 13"	NA	NA	NM_053608	NA	NA	NA	NA_x000D_
RAT04536	5.15472	P	2.48997	A	6.3412	6.3412	up	0	RAT04536	0	mRNA	Art2	ADP-ribosyltransferase 2	NA	NA	NM_198735	NA	NA	NA	NA_x000D_
RAT14414	6.72572	P	5.61308	P	2.1624	2.1624	up	0	RAT14414	0	mRNA	Ly96	lymphocyte antigen 96	NA	NA	NM_001024279	NA	NA	NA	NA_x000D_
RAT05914	8.21108	P	7.18456	P	2.03711	2.03711	up	0	RAT05914	0	mRNA	Cwc27	CWC27 spliceosome-associated protein homolog (S. cerevisiae)	NA	NA	NM_001013199	NA	NA	NA	NA_x000D_
RAT01079	5.57827	P	4.36182	A	2.32375	2.32375	up	0	RAT01079	0	mRNA	Uqcrb	ubiquinol-cytochrome c reductase binding protein	NA	NA	NM_001127553	NA	NA	NA	NA_x000D_
RAT21999	7.62003	P	6.59552	P	2.03428	2.03428	up	0	RAT21999	0	mRNA	Polr3g	polymerase (RNA) III (DNA directed) polypeptide G	NA	NA	NM_001109468	NA	NA	NA	NA_x000D_
RAT19940	5.41466	P	3.8338	A	2.99147	2.99147	up	0	RAT19940	0	mRNA	Celsr3	"cadherin, EGF LAG seven-pass G-type receptor 3 (flamingo homolog, Drosophila)"	NA	NA	NM_031320	NA	NA	NA	NA_x000D_
RAT12291	7.14375	P	5.71564	P	2.69094	2.69094	up	0	RAT12291	0	mRNA	Mcart1l	mitochondrial carrier triple repeat 1-like	NA	NA	NM_001127602	NA	NA	NA	NA_x000D_
RAT01111	13.57	P	12.4146	P	2.22743	2.22743	up	0	RAT01111	0	mRNA	Rpn1	ribophorin I	NA	NA	NM_013067	NA	NA	NA	NA_x000D_
RAT07126	5.23623	P	2.61489	A	6.15325	6.15325	up	0	RAT07126	0	mRNA	Nlrp12	"NLR family, pyrin domain containing 12"	NA	NA	NM_001169142	NA	NA	NA	NA_x000D_
RAT16748	5.30558	P	4.01594	A	2.44468	2.44468	up	0	RAT16748	0	mRNA	LOC691277	similar to Robo-1	NA	NA	NM_001109633	NA	NA	NA	NA_x000D_
RAT12418	5.31012	P	4.24428	A	2.09339	2.09339	up	0	RAT12418	0	mRNA	Tac4	tachykinin 4	NA	NA	NM_172328	NA	NA	NA	NA_x000D_
RAT10178	8.2873	P	6.23209	P	4.15605	4.15605	up	0	RAT10178	0	mRNA	Ly6al	"lymphocyte antigen 6 complex, locus A-like"	NA	NA	NM_001128099	NA	NA	NA	NA_x000D_
RAT22304	5.38036	P	2.59541	A	6.89216	6.89216	up	0	RAT22304	0	mRNA	Otol1	otolin 1	NA	NA	ENSRNOT00000035765	NA	NA	NA	NA_x000D_
RAT08767	7.03622	P	5.90714	P	2.1872	2.1872	up	0	RAT08767	0	mRNA	Lmbrd1	LMBR1 domain containing 1	NA	NA	NM_139189	NA	NA	NA	NA_x000D_
RAT10836	7.1608	P	5.08358	A	4.21993	4.21993	up	0	RAT10836	0	mRNA	Trim2	tripartite motif-containing 2	NA	NA	NM_001108552	NA	NA	NA	NA_x000D_
RAT06961	5.69881	P	2.60625	A	8.53012	8.53012	up	0	RAT06961	0	mRNA	Slc38a9	"solute carrier family 38, member 9"	NA	NA	NM_001035251	NA	NA	NA	NA_x000D_
RAT12669	6.71128	P	4.6325	A	4.22451	4.22451	up	0	RAT12669	0	mRNA	Mpzl3	myelin protein zero-like 3	NA	NA	NM_001108760	NA	NA	NA	NA_x000D_
RAT12942	5.267	P	2.61792	A	6.27269	6.27269	up	0	RAT12942	0	mRNA	Fcrla	Fc receptor-like A	NA	NA	NM_001100682	NA	NA	NA	NA_x000D_
RAT18376	6.09639	P	4.79863	A	2.45847	2.45847	up	0	RAT18376	0	mRNA	Pcdh1	protocadherin 1	NA	NA	ENSRNOT00000026324	NA	NA	NA	NA_x000D_
RAT15559	9.97729	P	8.88332	P	2.1346	2.1346	up	0	RAT15559	0	mRNA	Ppapdc2	phosphatidic acid phosphatase type 2 domain containing 2	NA	NA	NM_001034854	NA	NA	NA	NA_x000D_
RAT01807	9.41909	P	8.3267	P	2.13228	2.13228	up	0	RAT01807	0	mRNA	Sec13	SEC13 homolog (S. cerevisiae)	NA	NA	NM_001006978	NA	NA	NA	NA_x000D_
RAT20238	8.13281	P	6.97176	P	2.2362	2.2362	up	0	RAT20238	0	mRNA	Tmem135	transmembrane protein 135	NA	NA	NM_001013896	NA	NA	NA	NA_x000D_
RAT10350	7.04148	P	5.47515	P	2.96152	2.96152	up	0	RAT10350	0	mRNA	Lyve1	lymphatic vessel endothelial hyaluronan receptor 1	NA	NA	NM_001106286	NA	NA	NA	NA_x000D_
RAT07505	6.78941	P	4.17777	A	6.11201	6.11201	up	0	RAT07505	0	mRNA	Fam45a	"family with sequence similarity 45, member A"	NA	NA	NM_001127681	NA	NA	NA	NA_x000D_
RAT30182	6.72851	P	5.03135	A	3.24262	3.24262	up	0	RAT30182	0	mRNA	Nat2	N-acetyltransferase 2	NA	NA	NM_053854	NA	NA	NA	NA_x000D_
RAT20800	7.6665	P	6.0747	P	3.01425	3.01425	up	0	RAT20800	0	mRNA	RGD1560171	similar to PRO0149 protein	NA	NA	XM_001054786	NA	NA	NA	NA_x000D_
RAT02234	6.5476	P	4.9113	A	3.10869	3.10869	up	0	RAT02234	0	mRNA	Bche	butyrylcholinesterase	NA	NA	NM_022942	NA	NA	NA	NA_x000D_
RAT17596	6.26978	P	5.23138	P	2.05395	2.05395	up	0	RAT17596	0	mRNA	Npw	neuropeptide W	NA	NA	NM_153294	NA	NA	NA	NA_x000D_
RAT28583	5.23327	P	3.97528	A	2.39161	2.39161	up	0	RAT28583	0	mRNA	LOC683891	similar to CDC42-binding protein kinase alpha isoform B	NA	NA	XM_001061452	NA	NA	NA	NA_x000D_
RAT14945	9.49436	P	8.03107	P	2.75737	2.75737	up	0	RAT14945	0	mRNA	Abcd4	"ATP-binding cassette, subfamily D (ALD), member 4"	NA	NA	NM_001013100	NA	NA	NA	NA_x000D_
RAT00730	6.77636	P	5.52881	P	2.37438	2.37438	up	0	RAT00730	0	mRNA	Vps13d	vacuolar protein sorting 13 homolog D (S. cerevisiae)	NA	NA	NM_001108006	NA	NA	NA	NA_x000D_
RAT13468	7.53501	P	6.51952	P	2.02159	2.02159	up	0	RAT13468	0	mRNA	Yae1d1	Yae1 domain containing 1	NA	NA	NM_001107356	NA	NA	NA	NA_x000D_
RAT02315	6.04992	P	4.6617	A	2.61755	2.61755	up	0	RAT02315	0	mRNA	Pawr	"PRKC, apoptosis, WT1, regulator"	NA	NA	NM_033485	NA	NA	NA	NA_x000D_
RAT28953	5.46383	P	4.0468	A	2.67036	2.67036	up	0	RAT28953	0	mRNA	Olr372	olfactory receptor 372	NA	NA	NM_001001048	NA	NA	NA	NA_x000D_
RAT05330	9.72572	P	8.61997	P	2.15211	2.15211	up	0	RAT05330	0	mRNA	Serp1	stress-associated endoplasmic reticulum protein 1	NA	NA	NM_030835	NA	NA	NA	NA_x000D_
RAT11550	10.8352	P	9.40531	P	2.69429	2.69429	up	0	RAT11550	0	mRNA	Sgpp1	sphingosine-1-phosphate phosphatase 1	NA	NA	XM_001080791	NA	NA	NA	NA_x000D_
RAT10014	8.62078	P	7.56792	P	2.07463	2.07463	up	0	RAT10014	0	mRNA	Casp6	caspase 6	NA	NA	NM_031775	NA	NA	NA	NA_x000D_
RAT02127	8.07961	P	6.51007	P	2.96809	2.96809	up	0	RAT02127	0	mRNA	Pxmp3	peroxisomal membrane protein 3	NA	NA	NM_017234	NA	NA	NA	NA_x000D_
RAT00247	5.31992	P	4.3151	A	2.00669	2.00669	up	0	RAT00247	0	mRNA	Ptpn5	"protein tyrosine phosphatase, non-receptor type 5"	NA	NA	NM_019253	NA	NA	NA	NA_x000D_
RAT04746	5.39468	P	4.31792	A	2.10929	2.10929	up	0	RAT04746	0	mRNA	Zfp709	zinc finger protein 709	NA	NA	NM_153731	NA	NA	NA	NA_x000D_
RAT29649	5.32391	P	3.92804	A	2.63148	2.63148	up	0	RAT29649	0	mRNA	Olr98	olfactory receptor 98	NA	NA	NM_001000143	NA	NA	NA	NA_x000D_
RAT19955	5.95997	P	3.77589	A	4.54439	4.54439	up	0	RAT19955	0	mRNA	RGD1564031	"similar to transcription elongation factor B (SIII), polypeptide 2"	NA	NA	XM_001081217	NA	NA	NA	NA_x000D_
RAT19556	14.8935	P	13.8289	P	2.09149	2.09149	up	0	RAT19556	0	mRNA	Aldh1a1	"aldehyde dehydrogenase 1 family, member A1"	NA	NA	NM_022407	NA	NA	NA	NA_x000D_
RAT10367	8.30671	P	7.27812	P	2.04003	2.04003	up	0	RAT10367	0	mRNA	Arnt2	aryl hydrocarbon receptor nuclear translocator 2	NA	NA	NM_012781	NA	NA	NA	NA_x000D_
RAT05369	6.31717	P	5.11974	A	2.2933	2.2933	up	0	RAT05369	0	mRNA	Traf3ip3	TRAF3 interacting protein 3	NA	NA	NM_001014132	NA	NA	NA	NA_x000D_
RAT04487	5.9351	P	4.90301	A	2.04499	2.04499	up	0	RAT04487	0	mRNA	Tmx4	thioredoxin-related transmembrane protein 4	NA	NA	NM_001100529	NA	NA	NA	NA_x000D_
RAT09073	5.71168	P	2.47162	A	9.44834	9.44834	up	0	RAT09073	0	mRNA	Sash3	SAM and SH3 domain containing 3	NA	NA	NM_001134992	NA	NA	NA	NA_x000D_
RAT02609	10.2528	P	9.09746	P	2.22739	2.22739	up	0	RAT02609	0	mRNA	Slc29a1	"solute carrier family 29 (nucleoside transporters), member 1"	NA	NA	NM_031684	NA	NA	NA	NA_x000D_
RAT01337	6.05668	P	2.46212	A	12.0801	12.0801	up	0	RAT01337	0	mRNA	Epdr1	ependymin related protein 1 (zebrafish)	NA	NA	NM_001007625	NA	NA	NA	NA_x000D_
RAT28600	6.23055	P	4.8678	A	2.57174	2.57174	up	0	RAT28600	0	mRNA	Armc1	armadillo repeat containing 1	NA	NA	NM_001106425	NA	NA	NA	NA_x000D_
RAT23580	5.78527	P	4.62343	A	2.23742	2.23742	up	0	RAT23580	0	mRNA	Sall2	sal-like 2 (Drosophila)	NA	NA	NM_001107262	NA	NA	NA	NA_x000D_
RAT05944	6.31399	P	4.41747	A	3.72313	3.72313	up	0	RAT05944	0	mRNA	Amigo2	adhesion molecule with Ig like domain 2	NA	NA	NM_182816	NA	NA	NA	NA_x000D_
RAT18781	5.26932	P	3.38318	A	3.69646	3.69646	up	0	RAT18781	0	mRNA	Reg4	"regenerating islet-derived family, member 4"	NA	NA	NM_001004096	NA	NA	NA	NA_x000D_
RAT06280	6.9161	P	5.84741	P	2.09752	2.09752	up	0	RAT06280	0	mRNA	Bbs7	Bardet-Biedl syndrome 7	NA	NA	NM_001012180	NA	NA	NA	NA_x000D_
RAT04727	5.19524	P	4.01665	A	2.26355	2.26355	up	0	RAT04727	0	mRNA	Slc38a6	"solute carrier family 38, member 6"	NA	NA	NM_001013099	NA	NA	NA	NA_x000D_
RAT13105	6.52904	P	5.47386	P	2.07797	2.07797	up	0	RAT13105	0	mRNA	Peo1	progressive external ophthalmoplegia 1	NA	NA	NM_001107599	NA	NA	NA	NA_x000D_
RAT01991	8.52693	P	7.34638	P	2.26663	2.26663	up	0	RAT01991	0	mRNA	Timm21	translocase of inner mitochondrial membrane 21 homolog (yeast)	NA	NA	NM_001008343	NA	NA	NA	NA_x000D_
RAT26873	5.30079	P	2.52354	A	6.85547	6.85547	up	0	RAT26873	0	mRNA	Olr595	olfactory receptor 595	NA	NA	NM_001006596	NA	NA	NA	NA_x000D_
RAT02190	9.70164	P	8.60795	P	2.13419	2.13419	up	0	RAT02190	0	mRNA	Lgmn	legumain	NA	NA	NM_022226	NA	NA	NA	NA_x000D_
RAT10579	5.5355	P	2.57883	A	7.76328	7.76328	up	0	RAT10579	0	mRNA	Zic4	Zic family member 4	NA	NA	NM_001108176	NA	NA	NA	NA_x000D_
RAT07442	6.50141	P	4.60781	A	3.71559	3.71559	up	0	RAT07442	0	mRNA	Cldn10	claudin 10	NA	NA	NM_001106058	NA	NA	NA	NA_x000D_
RAT25712	5.44165	P	2.51945	A	7.58001	7.58001	up	0	RAT25712	0	mRNA	Vom2r37	"vomeronasal 2 receptor, 37"	NA	NA	NM_001099487	NA	NA	NA	NA_x000D_
RAT22618	6.14688	P	4.06646	A	4.22932	4.22932	up	0	RAT22618	0	mRNA	RGD1562551	similar to C20orf82	NA	NA	NM_001134552	NA	NA	NA	NA_x000D_
RAT27087	6.5109	P	2.97998	A	11.5588	11.5588	up	0	RAT27087	0	mRNA	Mettl11b	methyltransferase like 11B	NA	NA	ENSRNOT00000039581	NA	NA	NA	NA_x000D_
RAT19534	7.6122	P	6.45268	P	2.23382	2.23382	up	0	RAT19534	0	mRNA	Acot4	acyl-CoA thioesterase 4	NA	NA	NM_001109440	NA	NA	NA	NA_x000D_
RAT10622	8.67092	P	7.50161	P	2.24904	2.24904	up	0	RAT10622	0	mRNA	Eif1ax	"eukaryotic translation initiation factor 1A, X-linked"	NA	NA	NM_001106963	NA	NA	NA	NA_x000D_
RAT19699	5.15493	P	2.49655	A	6.31324	6.31324	up	0	RAT19699	0	mRNA	Ces1a	carboxylesterase 1A	NA	NA	NM_001190375	NA	NA	NA	NA_x000D_
RAT28355	6.1261	P	4.59526	A	2.88955	2.88955	up	0	RAT28355	0	mRNA	Pard3b	par-3 partitioning defective 3 homolog B (C. elegans)	NA	NA	NM_001191808	NA	NA	NA	NA_x000D_
RAT06161	9.10963	P	7.71633	P	2.62679	2.62679	up	0	RAT06161	0	mRNA	RGD1561490	"similar to Adaptor-related protein complex 1, mu 2 subunit (AP1M2)"	NA	NA	NM_001108996	NA	NA	NA	NA_x000D_
RAT17834	6.2881	P	2.44985	A	14.3031	14.3031	up	0	RAT17834	0	mRNA	Cys1	cystin 1	NA	NA	NM_001109597	NA	NA	NA	NA_x000D_
RAT00107	7.05074	P	5.65782	P	2.6261	2.6261	up	0	RAT00107	0	mRNA	Egr2	early growth response 2	NA	NA	NM_053633	NA	NA	NA	NA_x000D_
RAT01586	6.67286	P	5.66673	P	2.00852	2.00852	up	0	RAT01586	0	mRNA	RGD1305713	similar to RIKEN cDNA 3110040N11	NA	NA	NM_001024749	NA	NA	NA	NA_x000D_
RAT26765	8.08474	P	6.52839	P	2.9411	2.9411	up	0	RAT26765	0	mRNA	Cxcl12	chemokine (C-X-C motif) ligand 12	NA	NA	NM_022177	NA	NA	NA	NA_x000D_
RAT00653	8.71954	P	7.09336	P	3.08693	3.08693	up	0	RAT00653	0	mRNA	Rab25	"RAB25, member RAS oncogene family"	NA	NA	NM_001107687	NA	NA	NA	NA_x000D_
RAT25826	8.96567	P	7.96292	P	2.00381	2.00381	up	0	RAT25826	0	mRNA	Fam49b	"family with sequence similarity 49, member B"	NA	NA	NM_001126267	NA	NA	NA	NA_x000D_
RAT01101	6.1348	P	4.72213	A	2.66228	2.66228	up	0	RAT01101	0	mRNA	Ppm1d	"protein phosphatase, Mg2+/Mn2+ dependent, 1D"	NA	NA	NM_001105825	NA	NA	NA	NA_x000D_
RAT20689	5.72752	P	4.35496	A	2.58928	2.58928	up	0	RAT20689	0	mRNA	Vom2r47	"vomeronasal 2 receptor, 47"	NA	NA	NM_001099506	NA	NA	NA	NA_x000D_
RAT08161	9.45877	P	8.45234	P	2.00893	2.00893	up	0	RAT08161	0	mRNA	Ndufa9	"NADH dehydrogenase (ubiquinone) 1 alpha subcomplex, 9"	NA	NA	NM_001100752	NA	NA	NA	NA_x000D_
RAT06235	7.6468	P	6.30811	P	2.52922	2.52922	up	0	RAT06235	0	mRNA	Prps1	phosphoribosyl pyrophosphate synthetase 1	NA	NA	NM_017243	NA	NA	NA	NA_x000D_
RAT12196	6.87859	P	4.10329	A	6.84619	6.84619	up	0	RAT12196	0	mRNA	LOC100361814	ribonuclease 16-like	NA	NA	ENSRNOT00000060596	NA	NA	NA	NA_x000D_
RAT18899	5.82695	P	3.45638	A	5.17145	5.17145	up	0	RAT18899	0	mRNA	Entpd2	ectonucleoside triphosphate diphosphohydrolase 2	NA	NA	NM_172030	NA	NA	NA	NA_x000D_
RAT13014	6.53835	P	5.43706	P	2.14547	2.14547	up	0	RAT13014	0	mRNA	Foxr2	forkhead box R2	NA	NA	ENSRNOT00000043382	NA	NA	NA	NA_x000D_
RAT04087	13.1414	P	11.7017	P	2.71277	2.71277	up	0	RAT04087	0	mRNA	Hspa5	heat shock protein 5	NA	NA	NM_013083	NA	NA	NA	NA_x000D_
RAT10770	8.22178	P	6.85128	P	2.58562	2.58562	up	0	RAT10770	0	mRNA	Ppp1r3d	"protein phosphatase 1, regulatory subunit 3D"	NA	NA	NM_001109564	NA	NA	NA	NA_x000D_
RAT06938	5.68835	P	4.11991	A	2.96582	2.96582	up	0	RAT06938	0	mRNA	Spryd4	SPRY domain containing 4	NA	NA	NM_001037765	NA	NA	NA	NA_x000D_
RAT10694	6.67951	P	4.93293	A	3.35562	3.35562	up	0	RAT10694	0	mRNA	Eif4e	eukaryotic translation initiation factor 4E	NA	NA	NM_053974	NA	NA	NA	NA_x000D_
RAT09563	8.64703	P	7.59392	P	2.075	2.075	up	0	RAT09563	0	mRNA	Neu1	sialidase 1 (lysosomal sialidase)	NA	NA	NM_031522	NA	NA	NA	NA_x000D_
RAT10144	7.3112	P	6.03188	P	2.42724	2.42724	up	0	RAT10144	0	mRNA	Il18bp	interleukin 18 binding protein	NA	NA	NM_053374	NA	NA	NA	NA_x000D_
RAT15150	5.53047	P	2.53935	A	7.95088	7.95088	up	0	RAT15150	0	mRNA	RGD1304879	similar to Zinc finger protein 398 (Zinc finger DNA binding protein p52/p71)	NA	NA	NM_001014056	NA	NA	NA	NA_x000D_
RAT13057	7.25101	P	5.52944	P	3.29795	3.29795	up	0	RAT13057	0	mRNA	Vom1r40	vomeronasal 1 receptor 40	NA	NA	NM_001008904	NA	NA	NA	NA_x000D_
RAT02182	5.96259	P	4.55847	A	2.64657	2.64657	up	0	RAT02182	0	mRNA	Gnb3	"guanine nucleotide binding protein (G protein), beta polypeptide 3"	NA	NA	NM_021858	NA	NA	NA	NA_x000D_
RAT01673	6.95825	P	5.68295	P	2.42049	2.42049	up	0	RAT01673	0	mRNA	Agpat5	"1-acylglycerol-3-phosphate O-acyltransferase 5 (lysophosphatidic acid acyltransferase, epsilon)"	NA	NA	NM_001134744	NA	NA	NA	NA_x000D_
RAT20360	5.62804	P	4.39449	A	2.35145	2.35145	up	0	RAT20360	0	mRNA	Bpifb1	"BPI fold containing family B, member 1"	NA	NA	NM_001077680	NA	NA	NA	NA_x000D_
RAT00706	7.30543	P	5.96296	P	2.53585	2.53585	up	0	RAT00706	0	mRNA	Cdhr1	cadherin-related family member 1	NA	NA	NM_053572	NA	NA	NA	NA_x000D_
RAT02594	11.4542	P	10.3812	P	2.10382	2.10382	up	0	RAT02594	0	mRNA	Tmbim4	transmembrane BAX inhibitor motif containing 4	NA	NA	NM_199116	NA	NA	NA	NA_x000D_
RAT18105	10.8976	P	9.6798	P	2.32587	2.32587	up	0	RAT18105	0	mRNA	Tmem164	transmembrane protein 164	NA	NA	NM_001109014	NA	NA	NA	NA_x000D_
RAT05706	8.64607	P	7.64545	P	2.00086	2.00086	up	0	RAT05706	0	mRNA	Sccpdh	saccharopine dehydrogenase (putative)	NA	NA	NM_001013985	NA	NA	NA	NA_x000D_
RAT16849	6.88438	P	4.43328	A	5.46834	5.46834	up	0	RAT16849	0	mRNA	ste2	estrogen sulfotransferase	NA	NA	NM_001007718	NA	NA	NA	NA_x000D_
RAT18049	5.21492	P	3.92193	A	2.45035	2.45035	up	0	RAT18049	0	mRNA	Nudt6	nudix (nucleoside diphosphate linked moiety X)-type motif 6	NA	NA	NM_181363	NA	NA	NA	NA_x000D_
RAT03669	9.58439	P	8.36236	P	2.33276	2.33276	up	0	RAT03669	0	mRNA	RGD1562629	similar to neurobeachin	NA	NA	XR_085753	NA	NA	NA	NA_x000D_
RAT02673	6.93057	P	5.64636	P	2.43549	2.43549	up	0	RAT02673	0	mRNA	Frk	fyn-related kinase	NA	NA	NM_024368	NA	NA	NA	NA_x000D_
RAT11613	11.6033	P	9.97621	P	3.08879	3.08879	up	0	RAT11613	0	mRNA	Slc35f2	"solute carrier family 35, member F2"	NA	NA	NM_001106822	NA	NA	NA	NA_x000D_
RAT29729	9.84963	P	8.71023	P	2.20289	2.20289	up	0	RAT29729	0	mRNA	RGD1303271	similar to chromosome 1 open reading frame 172	NA	NA	NM_001004268	NA	NA	NA	NA_x000D_
RAT26695	5.65396	P	4.59667	A	2.08102	2.08102	up	0	RAT26695	0	mRNA	Hpn	hepsin	NA	NA	NM_017112	NA	NA	NA	NA_x000D_
RAT00722	9.07308	P	7.79039	P	2.43293	2.43293	up	0	RAT00722	0	mRNA	Lrrfip1	leucine rich repeat (in FLII) interacting protein 1	NA	NA	NM_001014269	NA	NA	NA	NA_x000D_
RAT26704	7.87924	P	5.10352	A	6.8482	6.8482	up	0	RAT26704	0	mRNA	Zik1	zinc finger protein interacting with K protein 1 homolog (mouse)	NA	NA	ENSRNOT00000014911	NA	NA	NA	NA_x000D_
RAT15420	6.6162	P	5.47946	P	2.19884	2.19884	up	0	RAT15420	0	mRNA	Myh3	"myosin, heavy chain 3, skeletal muscle, embryonic"	NA	NA	NM_012604	NA	NA	NA	NA_x000D_
RAT01725	12.7372	P	11.18	P	2.94293	2.94293	up	0	RAT01725	0	mRNA	Scd	stearoyl-CoA desaturase (delta-9-desaturase)	NA	NA	NM_031841	NA	NA	NA	NA_x000D_
RAT11328	5.25599	P	3.31133	A	3.84946	3.84946	up	0	RAT11328	0	mRNA	Nat13	N-acetyltransferase 13	NA	NA	NM_001105881	NA	NA	NA	NA_x000D_
RAT19393	6.6519	P	5.2431	P	2.65515	2.65515	up	0	RAT19393	0	mRNA	Kcnh2	"potassium voltage-gated channel, subfamily H (eag-related), member 2"	NA	NA	NM_053949	NA	NA	NA	NA_x000D_
RAT02937	9.74868	P	8.51216	P	2.3563	2.3563	up	0	RAT02937	0	mRNA	Lpcat3	lysophosphatidylcholine acyltransferase 3	NA	NA	NM_001012189	NA	NA	NA	NA_x000D_
RAT23149	7.50889	P	5.89866	P	3.053	3.053	up	0	RAT23149	0	mRNA	Ncaph	"non-SMC condensin I complex, subunit H"	NA	NA	XR_085785	NA	NA	NA	NA_x000D_
RAT16938	6.03276	P	2.43269	A	12.1263	12.1263	up	0	RAT16938	0	mRNA	Zfp385c	zinc finger protein 385C	NA	NA	ENSRNOT00000067868	NA	NA	NA	NA_x000D_
RAT27388	5.27989	P	4.22053	A	2.08401	2.08401	up	0	RAT27388	0	mRNA	Clec7a	"C-type lectin domain family 7, member A"	NA	NA	NM_001173386	NA	NA	NA	NA_x000D_
RAT19705	6.31814	P	3.64554	A	6.37578	6.37578	up	0	RAT19705	0	mRNA	Pm20d2	peptidase M20 domain containing 2	NA	NA	NM_001107922	NA	NA	NA	NA_x000D_
RAT17916	6.093	P	2.59456	A	11.3014	11.3014	up	0	RAT17916	0	mRNA	Cd163	CD163 molecule	NA	NA	NM_001107887	NA	NA	NA	NA_x000D_
RAT07229	8.73398	P	7.3589	P	2.59383	2.59383	up	0	RAT07229	0	mRNA	LOC689959	hypothetical protein LOC689959	NA	NA	NM_001109559	NA	NA	NA	NA_x000D_
RAT11322	5.59631	P	4.56992	A	2.03692	2.03692	up	0	RAT11322	0	mRNA	Zc3h6	zinc finger CCCH type containing 6	NA	NA	NM_001107772	NA	NA	NA	NA_x000D_
RAT11089	5.86644	P	3.71708	A	4.43631	4.43631	up	0	RAT11089	0	mRNA	Osbpl11	oxysterol binding protein-like 11	NA	NA	NM_001107090	NA	NA	NA	NA_x000D_
RAT24282	8.64017	P	6.98817	P	3.1427	3.1427	up	0	RAT24282	0	mRNA	LOC366979	hypothetical LOC366979	NA	NA	XR_005569	NA	NA	NA	NA_x000D_
RAT05240	12.4254	P	11.2259	P	2.29664	2.29664	up	0	RAT05240	0	mRNA	Ormdl2	ORM1-like 2 (S. cerevisiae)	NA	NA	NM_001105940	NA	NA	NA	NA_x000D_
RAT03282	6.75105	P	5.40688	P	2.53884	2.53884	up	0	RAT03282	0	mRNA	Iyd	iodotyrosine deiodinase	NA	NA	NM_001025000	NA	NA	NA	NA_x000D_
RAT28927	7.86052	P	6.84324	P	2.02409	2.02409	up	0	RAT28927	0	mRNA	Hmgn3	high mobility group nucleosomal binding domain 3	NA	NA	NM_001007020	NA	NA	NA	NA_x000D_
RAT07698	7.42156	P	5.80204	P	3.07273	3.07273	up	0	RAT07698	0	mRNA	Bmpr2	"bone morphogenetic protein receptor, type II (serine/threonine kinase)"	NA	NA	NM_080407	NA	NA	NA	NA_x000D_
RAT11114	8.28032	P	7.14096	P	2.20283	2.20283	up	0	RAT11114	0	mRNA	RGD1359158	similar to RIKEN cDNA 1110059E24	NA	NA	NM_001007737	NA	NA	NA	NA_x000D_
RAT08360	6.92586	P	2.43266	A	22.521	22.521	up	0	RAT08360	0	mRNA	RGD1563982	similar to F-box only protein 27	NA	NA	NM_001110491	NA	NA	NA	NA_x000D_
RAT27769	5.73829	P	4.73746	A	2.00115	2.00115	up	0	RAT27769	0	mRNA	Snx19	sorting nexin 19	NA	NA	NM_001108131	NA	NA	NA	NA_x000D_
RAT13300	7.48893	P	6.31183	P	2.2612	2.2612	up	0	RAT13300	0	mRNA	Utp14a	"UTP14, U3 small nucleolar ribonucleoprotein, homolog A (yeast)"	NA	NA	NM_001014113	NA	NA	NA	NA_x000D_
RAT25804	5.14409	P	3.23651	A	3.75179	3.75179	up	0	RAT25804	0	mRNA	Rbm20	RNA binding motif protein 20	NA	NA	NM_001107611	NA	NA	NA	NA_x000D_
RAT00264	8.81473	P	6.78257	P	4.09017	4.09017	up	0	RAT00264	0	mRNA	Rgn	regucalcin (senescence marker protein-30)	NA	NA	NM_031546	NA	NA	NA	NA_x000D_
RAT12079	12.0521	P	11.026	P	2.0365	2.0365	up	0	RAT12079	0	mRNA	Bin2a	beta-galactosidase-like protein	NA	NA	NM_001009524	NA	NA	NA	NA_x000D_
RAT00431	6.64237	P	5.00661	A	3.1075	3.1075	up	0	RAT00431	0	mRNA	Slc25a16	"solute carrier family 25 (mitochondrial carrier, Graves disease autoantigen), member 16"	NA	NA	NM_001100860	NA	NA	NA	NA_x000D_
RAT12655	9.84057	P	8.75909	P	2.1162	2.1162	up	0	RAT12655	0	mRNA	Tmem169	transmembrane protein 169	NA	NA	NM_001109574	NA	NA	NA	NA_x000D_
RAT11880	6.38609	P	3.38254	A	8.01967	8.01967	up	0	RAT11880	0	mRNA	Wdr5b	WD repeat domain 5B	NA	NA	NM_001024766	NA	NA	NA	NA_x000D_
RAT04616	6.51995	P	4.23848	A	4.86173	4.86173	up	0	RAT04616	0	mRNA	Samhd1	"SAM domain and HD domain, 1"	NA	NA	ENSRNOT00000008961	NA	NA	NA	NA_x000D_
RAT15638	6.32279	P	2.56355	A	13.5408	13.5408	up	0	RAT15638	0	mRNA	Mt4	metallothionein 4	NA	NA	NM_001126084	NA	NA	NA	NA_x000D_
RAT11293	5.49886	P	4.38862	A	2.15881	2.15881	up	0	RAT11293	0	mRNA	Napg	"N-ethylmaleimide-sensitive factor attachment protein, gamma"	NA	NA	NM_001107384	NA	NA	NA	NA_x000D_
RAT04743	5.99332	P	2.449	A	11.6666	11.6666	up	0	RAT04743	0	mRNA	Pigzl1	"phosphatidylinositol glycan, class Z-like 1"	NA	NA	ENSRNOT00000043300	NA	NA	NA	NA_x000D_
RAT17169	6.1484	P	2.4856	A	12.6652	12.6652	up	0	RAT17169	0	mRNA	Hnf4g	"hepatocyte nuclear factor 4, gamma"	NA	NA	NM_001108939	NA	NA	NA	NA_x000D_
RAT25749	5.98132	P	2.5597	A	10.7154	10.7154	up	0	RAT25749	0	mRNA	Cntn6	contactin 6	NA	NA	NM_013225	NA	NA	NA	NA_x000D_
RAT22185	8.24494	P	7.05773	P	2.27712	2.27712	up	0	RAT22185	0	mRNA	RGD1306233	similar to hypothetical protein MGC29761	NA	NA	NM_001106564	NA	NA	NA	NA_x000D_
RAT08120	5.78896	P	4.74457	A	2.0625	2.0625	up	0	RAT08120	0	mRNA	Olr710	olfactory receptor 710	NA	NA	NM_001000571	NA	NA	NA	NA_x000D_
RAT12601	9.75431	P	8.63169	P	2.17741	2.17741	up	0	RAT12601	0	mRNA	Snrnp27	small nuclear ribonucleoprotein 27 (U4/U6.U5)	NA	NA	NM_001108636	NA	NA	NA	NA_x000D_
RAT22184	8.5088	P	7.492	P	2.02341	2.02341	up	0	RAT22184	0	mRNA	Tmem213	transmembrane protein 213	NA	NA	ENSRNOT00000018331	NA	NA	NA	NA_x000D_
RAT21531	12.1178	P	10.2399	P	3.67526	3.67526	up	0	RAT21531	0	mRNA	Scd1	stearoyl-Coenzyme A desaturase 1	NA	NA	NM_139192	NA	NA	NA	NA_x000D_
RAT03209	6.526	P	5.37973	P	2.2134	2.2134	up	0	RAT03209	0	mRNA	Zfp868	zinc finger protein 868	NA	NA	NM_001009538	NA	NA	NA	NA_x000D_
RAT00850	14.7952	P	13.1612	P	3.10358	3.10358	up	0	RAT00850	0	mRNA	Gsta3	glutathione S-transferase A3	NA	NA	NM_031509	NA	NA	NA	NA_x000D_
RAT27331	16.8791	P	15.7971	P	2.11686	2.11686	up	0	RAT27331	0	mRNA	Defb39	defensin beta 39	NA	NA	NM_001037522	NA	NA	NA	NA_x000D_
RAT00009	8.9408	P	7.57163	P	2.58323	2.58323	up	0	RAT00009	0	mRNA	Dixdc1	DIX domain containing 1	NA	NA	NM_001037654	NA	NA	NA	NA_x000D_
RAT14497	6.18943	P	4.25964	A	3.81001	3.81001	up	0	RAT14497	0	mRNA	Sh2b2	SH2B adaptor protein 2	NA	NA	NM_053669	NA	NA	NA	NA_x000D_
RAT29011	9.80664	P	8.62876	P	2.26244	2.26244	up	0	RAT29011	0	mRNA	Eid3	EP300 interacting inhibitor of differentiation 3	NA	NA	NM_001044304	NA	NA	NA	NA_x000D_
RAT19856	6.26876	P	5.10104	A	2.24657	2.24657	up	0	RAT19856	0	mRNA	LOC100125368	zinc finger protein LOC100125368	NA	NA	NM_001139487	NA	NA	NA	NA_x000D_
RAT29061	7.2205	P	4.90509	A	4.97746	4.97746	up	0	RAT29061	0	mRNA	Zfp352	zinc finger protein 352	NA	NA	NM_001109357	NA	NA	NA	NA_x000D_
RAT25975	7.64888	P	6.41119	P	2.35821	2.35821	up	0	RAT25975	0	mRNA	Magohb	mago-nashi homolog B (Drosophila)	NA	NA	NM_001191105	NA	NA	NA	NA_x000D_
RAT14233	7.27118	P	3.82154	A	10.9256	10.9256	up	0	RAT14233	0	mRNA	Slc45a3	"solute carrier family 45, member 3"	NA	NA	NM_001135868	NA	NA	NA	NA_x000D_
RAT03087	5.78843	P	4.76911	A	2.02696	2.02696	up	0	RAT03087	0	mRNA	Med4	mediator complex subunit 4	NA	NA	NM_001024256	NA	NA	NA	NA_x000D_
RAT16060	6.07805	P	3.37124	A	6.5288	6.5288	up	0	RAT16060	0	mRNA	Chgb	chromogranin B	NA	NA	NM_012526	NA	NA	NA	NA_x000D_
RAT08168	5.13609	P	3.35138	A	3.44549	3.44549	up	0	RAT08168	0	mRNA	Galnt7	UDP-N-acetyl-alpha-D-galactosamine:polypeptide N-acetylgalactosaminyltransferase 7 (GalNAc-T7)	NA	NA	NM_022926	NA	NA	NA	NA_x000D_
RAT11405	9.85659	P	8.29642	P	2.9489	2.9489	up	0	RAT11405	0	mRNA	Mpzl2	myelin protein zero-like 2	NA	NA	NM_001106818	NA	NA	NA	NA_x000D_
RAT00786	7.61985	P	6.11033	P	2.84716	2.84716	up	0	RAT00786	0	mRNA	Zfp142	zinc finger protein 142	NA	NA	NM_001108225	NA	NA	NA	NA_x000D_
RAT12789	7.90349	P	6.36885	P	2.89714	2.89714	up	0	RAT12789	0	mRNA	Hmgn5	high mobility group nucleosome binding domain 5	NA	NA	NM_001134706	NA	NA	NA	NA_x000D_
RAT17442	6.51596	P	4.62943	A	3.69746	3.69746	up	0	RAT17442	0	mRNA	Usp51	ubiquitin specific peptidase 51	NA	NA	NM_001108252	NA	NA	NA	NA_x000D_
RAT22868	7.53789	P	6.32684	P	2.31506	2.31506	up	0	RAT22868	0	mRNA	Zpbp2	zona pellucida binding protein 2	NA	NA	NM_001007011	NA	NA	NA	NA_x000D_
RAT01988	11.255	P	10.1965	P	2.0827	2.0827	up	0	RAT01988	0	mRNA	Lyplal1	lysophospholipase-like 1	NA	NA	NM_001105986	NA	NA	NA	NA_x000D_
RAT18354	10.5963	P	9.59347	P	2.00397	2.00397	up	0	RAT18354	0	mRNA	Gclc	"glutamate-cysteine ligase, catalytic subunit"	NA	NA	NM_012815	NA	NA	NA	NA_x000D_
RAT14371	5.57242	P	4.08908	A	2.79594	2.79594	up	0	RAT14371	0	mRNA	Wdr73	WD repeat domain 73	NA	NA	NM_001107525	NA	NA	NA	NA_x000D_
RAT19601	12.3969	P	10.8683	P	2.88504	2.88504	up	0	RAT19601	0	mRNA	Hexb	hexosaminidase B	NA	NA	NM_001011946	NA	NA	NA	NA_x000D_
RAT10008	5.76705	P	4.34288	A	2.6836	2.6836	up	0	RAT10008	0	mRNA	RGD1564664	similar to LOC387763 protein	NA	NA	NM_001110055	NA	NA	NA	NA_x000D_
RAT10690	7.54116	P	6.46444	P	2.10923	2.10923	up	0	RAT10690	0	mRNA	LOC687105	hypothetical protein LOC687105	NA	NA	NM_001127591	NA	NA	NA	NA_x000D_
RAT07997	5.38569	P	4.16832	A	2.32522	2.32522	up	0	RAT07997	0	mRNA	3-Mar	membrane-associated ring finger (C3HC4) 3	NA	NA	NM_001007759	NA	NA	NA	NA_x000D_
RAT18809	9.82488	P	8.43338	P	2.6235	2.6235	up	0	RAT18809	0	mRNA	LOC686120	hypothetical protein LOC686120	NA	NA	NR_026689	NA	NA	NA	NA_x000D_
RAT01347	6.6248	P	5.56113	P	2.09024	2.09024	up	0	RAT01347	0	mRNA	Csrp2	cysteine and glycine-rich protein 2	NA	NA	NM_177425	NA	NA	NA	NA_x000D_
RAT21566	10.7692	P	9.41082	P	2.56393	2.56393	up	0	RAT21566	0	mRNA	Cycs	"cytochrome c, somatic"	NA	NA	NM_012839	NA	NA	NA	NA_x000D_
RAT02573	7.78526	P	6.76952	P	2.02194	2.02194	up	0	RAT02573	0	mRNA	Cdk17	cyclin-dependent kinase 17	NA	NA	NM_001108082	NA	NA	NA	NA_x000D_
RAT02868	7.6354	P	6.46274	P	2.25427	2.25427	up	0	RAT02868	0	mRNA	Selrc1	Sel1 repeat containing 1	NA	NA	NM_001106674	NA	NA	NA	NA_x000D_
RAT20373	7.7409	P	6.16147	P	2.9885	2.9885	up	0	RAT20373	0	mRNA	Slc3a1	"solute carrier family 3, member 1"	NA	NA	NM_017216	NA	NA	NA	NA_x000D_
RAT25003	10.0683	P	8.81357	P	2.38621	2.38621	up	0	RAT25003	0	mRNA	Pgrmc1	progesterone receptor membrane component 1	NA	NA	NM_021766	NA	NA	NA	NA_x000D_
RAT21917	6.38199	P	4.732	A	3.13832	3.13832	up	0	RAT21917	0	mRNA	Ovol1	ovo-like 1(Drosophila)	NA	NA	NM_001107572	NA	NA	NA	NA_x000D_
RAT01429	9.98707	P	8.73705	P	2.37845	2.37845	up	0	RAT01429	0	mRNA	Oxct1	3-oxoacid CoA transferase 1	NA	NA	NM_001127580	NA	NA	NA	NA_x000D_
RAT06261	6.71034	P	5.50285	P	2.30935	2.30935	up	0	RAT06261	0	mRNA	Il2rb	"interleukin 2 receptor, beta"	NA	NA	NM_013195	NA	NA	NA	NA_x000D_
RAT22586	6.36211	P	2.5118	A	14.423	14.423	up	0	RAT22586	0	mRNA	Gpr50	G protein-coupled receptor 50	NA	NA	NM_001191915	NA	NA	NA	NA_x000D_
RAT14039	15.1823	P	13.9309	P	2.38086	2.38086	up	0	RAT14039	0	mRNA	Prom1	prominin 1	NA	NA	NM_021751	NA	NA	NA	NA_x000D_
RAT22467	6.3787	P	3.75419	A	6.16675	6.16675	up	0	RAT22467	0	mRNA	Snrpn	small nuclear ribonucleoprotein polypeptide N	NA	NA	NM_031117	NA	NA	NA	NA_x000D_
RAT05762	6.71153	P	3.94401	A	6.80932	6.80932	up	0	RAT05762	0	mRNA	Muc1	"mucin 1, cell surface associated"	NA	NA	NM_012602	NA	NA	NA	NA_x000D_
RAT01440	7.23755	P	4.45294	A	6.89048	6.89048	up	0	RAT01440	0	mRNA	Ap1s1	"adaptor-related protein complex 1, sigma 1 subunit"	NA	NA	NM_001108331	NA	NA	NA	NA_x000D_
RAT28792	7.08091	P	6.05052	P	2.04257	2.04257	up	0	RAT28792	0	mRNA	Prss22	"protease, serine, 22"	NA	NA	NM_001106984	NA	NA	NA	NA_x000D_
RAT16825	6.45922	P	4.80802	A	3.14095	3.14095	up	0	RAT16825	0	mRNA	Olr1614	olfactory receptor 1614	NA	NA	NM_001000841	NA	NA	NA	NA_x000D_
RAT18577	6.45055	P	4.29106	A	4.46756	4.46756	up	0	RAT18577	0	mRNA	Zfp469	zinc finger protein 469	NA	NA	NM_001107123	NA	NA	NA	NA_x000D_
RAT19488	5.73853	P	3.27797	A	5.50429	5.50429	up	0	RAT19488	0	mRNA	Camkmt	calmodulin-lysine N-methyltransferase	NA	NA	NM_001134463	NA	NA	NA	NA_x000D_
RAT24941	7.39756	P	6.34325	P	2.07673	2.07673	up	0	RAT24941	0	mRNA	Stau2	"staufen, RNA binding protein, homolog 2 (Drosophila)"	NA	NA	NM_134466	NA	NA	NA	NA_x000D_
RAT15872	9.09013	P	8.06687	P	2.03251	2.03251	up	0	RAT15872	0	mRNA	Zc3h13	zinc finger CCCH type containing 13	NA	NA	NM_001170471	NA	NA	NA	NA_x000D_
RAT01488	8.81708	P	7.14672	P	3.18293	3.18293	up	0	RAT01488	0	mRNA	Fam213a	"family with sequence similarity 213, member A"	NA	NA	NM_001008297	NA	NA	NA	NA_x000D_
RAT08584	8.3228	P	7.0092	P	2.48561	2.48561	up	0	RAT08584	0	mRNA	FAM120C	family with sequence similarity 120C	NA	NA	XM_001068090	NA	NA	NA	NA_x000D_
RAT19830	11.2022	P	9.51724	P	3.21521	3.21521	up	0	RAT19830	0	mRNA	Rhox5	reproductive homeobox 5	NA	NA	NM_022175	NA	NA	NA	NA_x000D_
RAT14079	7.26163	P	6.18943	P	2.10263	2.10263	up	0	RAT14079	0	mRNA	Dlk2	delta-like 2 homolog (Drosophila)	NA	NA	NM_001108202	NA	NA	NA	NA_x000D_
RAT25075	5.92051	P	4.62693	A	2.45135	2.45135	up	0	RAT25075	0	mRNA	Baat	bile acid CoA: amino acid N-acyltransferase (glycine N-choloyltransferase)	NA	NA	NM_017300	NA	NA	NA	NA_x000D_
RAT03874	6.22704	P	2.56861	A	12.627	12.627	up	0	RAT03874	0	mRNA	Mtrf1l	mitochondrial translational release factor 1-like	NA	NA	NM_001025723	NA	NA	NA	NA_x000D_
RAT00355	6.34026	P	4.61043	A	3.31691	3.31691	up	0	RAT00355	0	mRNA	Glce	glucuronic acid epimerase	NA	NA	XM_343404	NA	NA	NA	NA_x000D_
RAT09876	6.6758	P	5.16728	P	2.84518	2.84518	up	0	RAT09876	0	mRNA	Casp3	caspase 3	NA	NA	NM_012922	NA	NA	NA	NA_x000D_
RAT10464	5.79292	P	2.52373	A	9.64103	9.64103	up	0	RAT10464	0	mRNA	LOC689725	similar to chromosome 9 open reading frame 79	NA	NA	ENSRNOT00000037765	NA	NA	NA	NA_x000D_
RAT01108	8.41828	P	6.40458	P	4.03818	4.03818	up	0	RAT01108	0	mRNA	Sorcs2	sortilin-related VPS10 domain containing receptor 2	NA	NA	NM_001107225	NA	NA	NA	NA_x000D_
RAT23991	6.13955	P	2.49897	A	12.4716	12.4716	up	0	RAT23991	0	mRNA	Il13ra2	"interleukin 13 receptor, alpha 2"	NA	NA	NM_133538	NA	NA	NA	NA_x000D_
RAT00962	5.13577	P	4.11241	A	2.03265	2.03265	up	0	RAT00962	0	mRNA	Osbp	oxysterol binding protein	NA	NA	NM_001108927	NA	NA	NA	NA_x000D_
RAT20186	11.3586	P	10.2311	P	2.18482	2.18482	up	0	RAT20186	0	mRNA	Fcgbpl1	Fc fragment of IgG binding protein-like 1	NA	NA	NM_001164656	NA	NA	NA	NA_x000D_
RAT04458	6.01962	P	4.39772	A	3.07781	3.07781	up	0	RAT04458	0	mRNA	RGD1307934	"similar to DNA segment, Chr 19, ERATO Doi 386, expressed"	NA	NA	ENSRNOT00000031133	NA	NA	NA	NA_x000D_
RAT20656	8.22454	P	7.05665	P	2.24683	2.24683	up	0	RAT20656	0	mRNA	Tsr2	"TSR2, 20S rRNA accumulation, homolog (S. cerevisiae)"	NA	NA	NM_001115027	NA	NA	NA	NA_x000D_
RAT01838	6.17932	P	5.1266	P	2.07443	2.07443	up	0	RAT01838	0	mRNA	Renbp	renin binding protein	NA	NA	NM_031095	NA	NA	NA	NA_x000D_
RAT14655	9.28241	P	8.08228	P	2.2976	2.2976	up	0	RAT14655	0	mRNA	Slc25a35	"solute carrier family 25, member 35"	NA	NA	NM_001109033	NA	NA	NA	NA_x000D_
RAT26441	8.60073	P	7.21056	P	2.6211	2.6211	up	0	RAT26441	0	mRNA	Shmt1	serine hydroxymethyltransferase 1 (soluble)	NA	NA	NM_001047842	NA	NA	NA	NA_x000D_
RAT14470	5.34248	P	4.0748	A	2.40774	2.40774	up	0	RAT14470	0	mRNA	LOC497952	similar to Ubiquitin-associated protein 2-like	NA	NA	XR_005763	NA	NA	NA	NA_x000D_
RAT00434	7.52405	P	5.8457	P	3.20063	3.20063	up	0	RAT00434	0	mRNA	Rerg	"RAS-like, estrogen-regulated, growth-inhibitor"	NA	NA	XM_578417	NA	NA	NA	NA_x000D_
RAT05963	6.89545	P	5.72203	P	2.25545	2.25545	up	0	RAT05963	0	mRNA	RGD1308299	similar to chromosome 6 open reading frame 130	NA	NA	NM_001134596	NA	NA	NA	NA_x000D_
RAT02838	5.52901	P	3.92282	A	3.04446	3.04446	up	0	RAT02838	0	mRNA	Rdh14	retinol dehydrogenase 14 (all-trans/9-cis/11-cis)	NA	NA	NM_001109276	NA	NA	NA	NA_x000D_
RAT09419	9.40024	P	8.16452	P	2.35498	2.35498	up	0	RAT09419	0	mRNA	Atp13a4	ATPase type 13A4	NA	NA	NM_001191658	NA	NA	NA	NA_x000D_
RAT08031	6.6269	P	4.56675	A	4.17031	4.17031	up	0	RAT08031	0	mRNA	RGD1563398	RGD1563398	NA	NA	ENSRNOT00000036545	NA	NA	NA	NA_x000D_
RAT15213	8.47505	P	4.91998	A	11.7539	11.7539	up	0	RAT15213	0	mRNA	Tex10	testis expressed 10	NA	NA	NM_001106653	NA	NA	NA	NA_x000D_
RAT03449	7.42357	P	6.03534	P	2.61757	2.61757	up	0	RAT03449	0	mRNA	Pno1	partner of NOB1 homolog (S. cerevisiae)	NA	NA	NM_199083	NA	NA	NA	NA_x000D_
RAT00176	9.55891	P	8.35731	P	2.29995	2.29995	up	0	RAT00176	0	mRNA	Ppm1l	"protein phosphatase, Mg2+/Mn2+ dependent, 1L"	NA	NA	NM_001107681	NA	NA	NA	NA_x000D_
RAT17167	5.47716	P	4.30401	A	2.25504	2.25504	up	0	RAT17167	0	mRNA	Sdcbp2	syndecan binding protein (syntenin) 2	NA	NA	NM_001025692	NA	NA	NA	NA_x000D_
RAT16710	15.6746	P	14.2516	P	2.68145	2.68145	up	0	RAT16710	0	mRNA	Ces5a	carboxylesterase 5A	NA	NA	NM_001012056	NA	NA	NA	NA_x000D_
RAT09227	6.25542	P	4.85887	A	2.63271	2.63271	up	0	RAT09227	0	mRNA	Gys2	glycogen synthase 2	NA	NA	NM_013089	NA	NA	NA	NA_x000D_
RAT10339	7.17654	P	5.447	P	3.31623	3.31623	up	0	RAT10339	0	mRNA	Mab21l3	mab-21-like 3 (C. elegans)	NA	NA	NM_001106456	NA	NA	NA	NA_x000D_
RAT21815	5.87464	P	4.87266	A	2.00275	2.00275	up	0	RAT21815	0	mRNA	Tmem186	transmembrane protein 186	NA	NA	NM_001025756	NA	NA	NA	NA_x000D_
RAT09977	8.49495	P	7.26925	P	2.33869	2.33869	up	0	RAT09977	0	mRNA	Slc33a1	"solute carrier family 33 (acetyl-CoA transporter), member 1"	NA	NA	NM_022252	NA	NA	NA	NA_x000D_
RAT07583	5.58308	P	2.57506	A	8.04459	8.04459	up	0	RAT07583	0	mRNA	Emr1	"EGF-like module containing, mucin-like, hormone receptor-like 1"	NA	NA	NM_001007557	NA	NA	NA	NA_x000D_
RAT25191	10.8908	P	9.77421	P	2.16832	2.16832	up	0	RAT25191	0	mRNA	Tgoln1	trans-golgi network protein	NA	NA	NM_138840	NA	NA	NA	NA_x000D_
RAT23968	12.7063	P	11.5551	P	2.22091	2.22091	up	0	RAT23968	0	mRNA	Spint2	"serine peptidase inhibitor, Kunitz type, 2"	NA	NA	NM_001082549	NA	NA	NA	NA_x000D_
RAT29352	5.27802	P	4.09636	A	2.26839	2.26839	up	0	RAT29352	0	mRNA	Kctd11	potassium channel tetramerisation domain containing 11	NA	NA	NM_001108831	NA	NA	NA	NA_x000D_
RAT00710	5.79671	P	4.29782	A	2.82626	2.82626	up	0	RAT00710	0	mRNA	Epha4	Eph receptor A4	NA	NA	NM_001162411	NA	NA	NA	NA_x000D_
RAT03530	5.55153	P	3.91002	A	3.11993	3.11993	up	0	RAT03530	0	mRNA	Gtse1	G-2 and S-phase expressed 1	NA	NA	NM_001130500	NA	NA	NA	NA_x000D_
RAT18600	11.8261	P	10.1903	P	3.10757	3.10757	up	0	RAT18600	0	mRNA	Defb23	defensin beta 23	NA	NA	NM_001037518	NA	NA	NA	NA_x000D_
RAT19030	12.4041	P	11.1569	P	2.37382	2.37382	up	0	RAT19030	0	mRNA	Aifm1	"apoptosis-inducing factor, mitochondrion-associated 1"	NA	NA	NM_031356	NA	NA	NA	NA_x000D_
RAT01786	7.23093	P	6.17429	P	2.08009	2.08009	up	0	RAT01786	0	mRNA	Trappc10	trafficking protein particle complex 10	NA	NA	NM_001173528	NA	NA	NA	NA_x000D_
RAT02924	5.647	P	3.84639	A	3.48367	3.48367	up	0	RAT02924	0	mRNA	Naaa	N-acylethanolamine acid amidase	NA	NA	NM_001010967	NA	NA	NA	NA_x000D_
RAT22881	6.10756	P	2.51437	A	12.0686	12.0686	up	0	RAT22881	0	mRNA	Lair1	leukocyte-associated immunoglobulin-like receptor 1	NA	NA	NM_001029928	NA	NA	NA	NA_x000D_
RAT13701	14.7336	P	13.3558	P	2.5987	2.5987	up	0	RAT13701	0	mRNA	Eddm3b	epididymal protein 3B	NA	NA	NM_178103	NA	NA	NA	NA_x000D_
RAT10268	5.64744	P	4.54795	A	2.14279	2.14279	up	0	RAT10268	0	mRNA	RGD1359127	similar to RIKEN cDNA 2310011J03	NA	NA	NM_001007657	NA	NA	NA	NA_x000D_
RAT11149	5.94269	P	4.41099	A	2.89127	2.89127	up	0	RAT11149	0	mRNA	Npat	"nuclear protein, ataxia-telangiectasia locus"	NA	NA	NM_001108147	NA	NA	NA	NA_x000D_
RAT22272	7.18636	P	5.8694	P	2.4914	2.4914	up	0	RAT22272	0	mRNA	RGD1566265	similar to RIKEN cDNA 2610002M06	NA	NA	NM_001134589	NA	NA	NA	NA_x000D_
RAT13591	7.57096	P	6.50333	P	2.09598	2.09598	up	0	RAT13591	0	mRNA	Rassf7	Ras association (RalGDS/AF-6) domain family (N-terminal) member 7	NA	NA	NM_001106317	NA	NA	NA	NA_x000D_
RAT01574	10.0946	P	8.97151	P	2.1781	2.1781	up	0	RAT01574	0	mRNA	Enc1	ectodermal-neural cortex 1	NA	NA	NM_001003401	NA	NA	NA	NA_x000D_
RAT26056	9.42442	P	8.34166	P	2.11809	2.11809	up	0	RAT26056	0	mRNA	Mthfd2	"methylenetetrahydrofolate dehydrogenase (NADP+ dependent) 2, methenyltetrahydrofolate cyclohydrolase"	NA	NA	NM_001109398	NA	NA	NA	NA_x000D_
RAT06776	6.02355	P	4.29309	A	3.31832	3.31832	up	0	RAT06776	0	mRNA	Nkiras2	NFKB inhibitor interacting Ras-like 2	NA	NA	NM_001105839	NA	NA	NA	NA_x000D_
RAT29518	11.3199	P	10.1122	P	2.30971	2.30971	up	0	RAT29518	0	mRNA	Psat1	phosphoserine aminotransferase 1	NA	NA	NM_198738	NA	NA	NA	NA_x000D_
RAT20443	10.3453	P	7.28911	P	8.31749	8.31749	up	0	RAT20443	0	mRNA	Defb41	defensin beta 41	NA	NA	NM_001037526	NA	NA	NA	NA_x000D_
RAT07097	6.60243	P	5.41837	P	2.27215	2.27215	up	0	RAT07097	0	mRNA	Dctn1	dynactin 1	NA	NA	NM_024130	NA	NA	NA	NA_x000D_
RAT05831	10.6185	P	8.9791	P	3.11533	3.11533	up	0	RAT05831	0	mRNA	Dlgap5	"discs, large (Drosophila) homolog-associated protein 5"	NA	NA	NM_001135802	NA	NA	NA	NA_x000D_
RAT27439	6.29009	P	5.22228	P	2.09625	2.09625	up	0	RAT27439	0	mRNA	RGD1311874	hypothetical LOC300751	NA	NA	NM_001106825	NA	NA	NA	NA_x000D_
RAT19708	6.0558	P	4.5483	A	2.84317	2.84317	up	0	RAT19708	0	mRNA	P2ry1	"purinergic receptor P2Y, G-protein coupled, 1"	NA	NA	NM_012800	NA	NA	NA	NA_x000D_
RAT21236	6.68179	P	5.37252	P	2.47816	2.47816	up	0	RAT21236	0	mRNA	Hint3	histidine triad nucleotide binding protein 3	NA	NA	ENSRNOT00000019047	NA	NA	NA	NA_x000D_
RAT03129	5.40052	P	3.87825	A	2.87244	2.87244	up	0	RAT03129	0	mRNA	Meis3	Meis homeobox 3	NA	NA	NM_001108472	NA	NA	NA	NA_x000D_
RAT12944	10.32	P	9.1959	P	2.17961	2.17961	up	0	RAT12944	0	mRNA	Eid3	EP300 interacting inhibitor of differentiation 3	NA	NA	NM_001044304	NA	NA	NA	NA_x000D_
RAT01450	6.48062	P	5.22655	A	2.38514	2.38514	up	0	RAT01450	0	mRNA	LOC684352	similar to twinfilin-like protein	NA	NA	NM_001135238	NA	NA	NA	NA_x000D_
RAT18506	15.8325	P	14.4383	P	2.6285	2.6285	up	0	RAT18506	0	mRNA	Mif	macrophage migration inhibitory factor	NA	NA	S73424	NA	NA	NA	NA_x000D_
RAT16102	6.26444	P	4.89138	A	2.59019	2.59019	up	0	RAT16102	0	mRNA	Spinlw1	"serine peptidase inhibitor-like, with Kunitz and WAP domains 1 (eppin)"	NA	NA	GQ406385	NA	NA	NA	NA_x000D_
RAT22922	9.71442	P	8.6562	P	2.08236	2.08236	up	0	RAT22922	0	mRNA	Hdhd2	haloacid dehalogenase-like hydrolase domain containing 2	NA	NA	NM_001014151	NA	NA	NA	NA_x000D_
RAT07653	11.5583	P	10.4804	P	2.11089	2.11089	up	0	RAT07653	0	mRNA	Ipmk	inositol polyphosphate multikinase	NA	NA	NM_134417	NA	NA	NA	NA_x000D_
RAT01551	10.8274	P	8.96843	P	3.62747	3.62747	up	0	RAT01551	0	mRNA	Cd1d1	CD1d1 molecule	NA	NA	NM_017079	NA	NA	NA	NA_x000D_
RAT04377	8.67522	P	7.62989	P	2.06384	2.06384	up	0	RAT04377	0	mRNA	Setd3	SET domain containing 3	NA	NA	ENSRNOT00000009120	NA	NA	NA	NA_x000D_
RAT11363	6.81205	P	3.88266	A	7.61789	7.61789	up	0	RAT11363	0	mRNA	Npas2	neuronal PAS domain protein 2	NA	NA	NM_001108214	NA	NA	NA	NA_x000D_
RAT06920	6.16704	P	4.70088	A	2.76286	2.76286	up	0	RAT06920	0	mRNA	Tfrc	transferrin receptor	NA	NA	NM_022712	NA	NA	NA	NA_x000D_
RAT29333	6.16533	P	5.11992	A	2.06395	2.06395	up	0	RAT29333	0	mRNA	Txnrd2	thioredoxin reductase 2	NA	NA	NM_022584	NA	NA	NA	NA_x000D_
RAT21781	8.41601	P	7.26701	P	2.21761	2.21761	up	0	RAT21781	0	mRNA	Zfp509	zinc finger protein 509	NA	NA	NM_001107223	NA	NA	NA	NA_x000D_
RAT01963	5.12052	P	2.40664	A	6.56087	6.56087	up	0	RAT01963	0	mRNA	Ptprd	"protein tyrosine phosphatase, receptor type, D"	NA	NA	XM_233065	NA	NA	NA	NA_x000D_
RAT02308	8.23397	P	7.12253	P	2.16061	2.16061	up	0	RAT02308	0	mRNA	Impa1	Inositol (myo)-1(or 4)-monophosphatase 1	NA	NA	NM_032057	NA	NA	NA	NA_x000D_
RAT10678	5.56486	P	3.17742	A	5.23229	5.23229	up	0	RAT10678	0	mRNA	MGC94891	hypothetical protein LOC681210	NA	NA	NM_001044277	NA	NA	NA	NA_x000D_
RAT22918	6.76541	P	5.596	P	2.24921	2.24921	up	0	RAT22918	0	mRNA	Cdc42se2	CDC42 small effector 2	NA	NA	NM_001126089	NA	NA	NA	NA_x000D_
RAT05116	5.6354	P	4.50632	A	2.18719	2.18719	up	0	RAT05116	0	mRNA	Spop	speckle-type POZ protein	NA	NA	NM_001100496	NA	NA	NA	NA_x000D_
RAT10356	9.12673	P	7.92714	P	2.29675	2.29675	up	0	RAT10356	0	mRNA	Galnt1	UDP-N-acetyl-alpha-D-galactosamine:polypeptide N-acetylgalactosaminyltransferase 1 (GalNAc-T1)	NA	NA	ENSRNOT00000022117	NA	NA	NA	NA_x000D_
RAT13136	7.62772	P	6.59671	P	2.04345	2.04345	up	0	RAT13136	0	mRNA	Fhit	fragile histidine triad gene	NA	NA	NM_021774	NA	NA	NA	NA_x000D_
RAT16445	12.5044	P	10.5577	P	3.85492	3.85492	up	0	RAT16445	0	mRNA	Svs4	seminal vesicle secretory protein 4	NA	NA	NM_012662	NA	NA	NA	NA_x000D_
RAT16352	7.12657	P	4.92129	A	4.61164	4.61164	up	0	RAT16352	0	mRNA	Ubxn2a	UBX domain protein 2A	NA	NA	NM_001109482	NA	NA	NA	NA_x000D_
RAT00773	7.23423	P	6.0866	P	2.2155	2.2155	up	0	RAT00773	0	mRNA	RGD1305572	similar to hypothetical protein MGC30618	NA	NA	NM_001024970	NA	NA	NA	NA_x000D_
RAT24965	6.58766	P	5.48255	P	2.15115	2.15115	up	0	RAT24965	0	mRNA	Cbfa2t3	"core-binding factor, runt domain, alpha subunit 2; translocated to, 3"	NA	NA	NM_001108453	NA	NA	NA	NA_x000D_
RAT05306	6.9385	P	3.4778	A	11.0097	11.0097	up	0	RAT05306	0	mRNA	O3far1	omega-3 fatty acid receptor 1	NA	NA	NM_001047088	NA	NA	NA	NA_x000D_
RAT14964	11.9327	P	10.5644	P	2.58172	2.58172	up	0	RAT14964	0	mRNA	Spink13	"serine peptidase inhibitor, Kazal type 13"	NA	NA	NM_001109539	NA	NA	NA	NA_x000D_
RAT08199	6.79005	P	5.66336	P	2.18357	2.18357	up	0	RAT08199	0	mRNA	Vcpip1	valosin containing protein (p97)/p47 complex interacting protein 1	NA	NA	ENSRNOT00000009136	NA	NA	NA	NA_x000D_
RAT22000	5.33984	P	4.05562	A	2.43551	2.43551	up	0	RAT22000	0	mRNA	Polr3g	polymerase (RNA) III (DNA directed) polypeptide G	NA	NA	NM_001109468	NA	NA	NA	NA_x000D_
RAT23731	5.25264	P	2.57838	A	6.38311	6.38311	up	0	RAT23731	0	mRNA	Ltc4s	leukotriene C4 synthase	NA	NA	NM_053639	NA	NA	NA	NA_x000D_
RAT29804	7.01886	P	5.37078	P	3.13417	3.13417	up	0	RAT29804	0	mRNA	Pragmin	pragma of Rnd2	NA	NA	NM_001107315	NA	NA	NA	NA_x000D_
RAT29387	6.06721	P	4.47717	A	3.01058	3.01058	up	0	RAT29387	0	mRNA	Mier2	"mesoderm induction early response 1, family member 2"	NA	NA	NM_001108737	NA	NA	NA	NA_x000D_
RAT01156	10.4618	P	9.23753	P	2.33643	2.33643	up	0	RAT01156	0	mRNA	Slc2a1	"solute carrier family 2 (facilitated glucose transporter), member 1"	NA	NA	NM_138827	NA	NA	NA	NA_x000D_
RAT10585	7.32007	P	5.94283	P	2.59772	2.59772	up	0	RAT10585	0	mRNA	RGD1561149	similar to mKIAA1522 protein	NA	NA	NM_001134629	NA	NA	NA	NA_x000D_
RAT30314	11.4234	P	9.95086	P	2.77518	2.77518	up	0	RAT30314	0	mRNA	RGD1310313	similar to RIKEN cDNA 1110001M20	NA	NA	NM_001139465	NA	NA	NA	NA_x000D_
RAT12870	12.0376	P	10.6856	P	2.55268	2.55268	up	0	RAT12870	0	mRNA	Spink13	"serine peptidase inhibitor, Kazal type 13"	NA	NA	NM_001109539	NA	NA	NA	NA_x000D_
RAT13228	6.92959	P	5.90485	P	2.0346	2.0346	up	0	RAT13228	0	mRNA	Fdxacb1	ferredoxin-fold anticodon binding domain containing 1	NA	NA	NM_001108145	NA	NA	NA	NA_x000D_
RAT24091	10.7238	P	9.48913	P	2.35328	2.35328	up	0	RAT24091	0	mRNA	Hsd17b4	hydroxysteroid (17-beta) dehydrogenase 4	NA	NA	NM_024392	NA	NA	NA	NA_x000D_
RAT02427	8.04859	P	7.04577	P	2.00392	2.00392	up	0	RAT02427	0	mRNA	Atp2c1	"ATPase, Ca++ transporting, type 2C, member 1"	NA	NA	NM_131907	NA	NA	NA	NA_x000D_
RAT03817	7.82796	P	6.76806	P	2.08479	2.08479	up	0	RAT03817	0	mRNA	Ufl1	Ufm1-specific ligase 1	NA	NA	NM_001126279	NA	NA	NA	NA_x000D_
RAT02209	9.08554	P	7.91773	P	2.24669	2.24669	up	0	RAT02209	0	mRNA	Prdx3	peroxiredoxin 3	NA	NA	NM_022540	NA	NA	NA	NA_x000D_
RAT10555	6.47543	P	5.14801	P	2.50953	2.50953	up	0	RAT10555	0	mRNA	Rpe	ribulose-5-phosphate-3-epimerase	NA	NA	NM_001033903	NA	NA	NA	NA_x000D_
RAT21362	6.86185	P	5.73815	P	2.17905	2.17905	up	0	RAT21362	0	mRNA	Adcy5	adenylate cyclase 5	NA	NA	NM_022600	NA	NA	NA	NA_x000D_
RAT10433	6.26767	P	4.51038	A	3.38063	3.38063	up	0	RAT10433	0	mRNA	Bri3bp	Bri3 binding protein	NA	NA	NM_001017487	NA	NA	NA	NA_x000D_
RAT25328	9.93374	P	8.75095	P	2.27014	2.27014	up	0	RAT25328	0	mRNA	Hspd1-ps2	"heat shock protein 1, pseudogene 2"	NA	NA	XR_005902	NA	NA	NA	NA_x000D_
RAT00755	11.0502	P	9.94664	P	2.14881	2.14881	up	0	RAT00755	0	mRNA	Tfg	Trk-fused gene	NA	NA	NM_001012144	NA	NA	NA	NA_x000D_
RAT21892	10.2284	P	8.10338	P	4.36205	4.36205	up	0	RAT21892	0	mRNA	Gpr98	G protein-coupled receptor 98	NA	NA	XM_002725894	NA	NA	NA	NA_x000D_
RAT08553	7.21351	P	5.99177	P	2.33229	2.33229	up	0	RAT08553	0	mRNA	Hmgb3	high mobility group box 3	NA	NA	NM_001173341	NA	NA	NA	NA_x000D_
RAT09361	6.38263	P	4.71426	A	3.17856	3.17856	up	0	RAT09361	0	mRNA	Foxq1	forkhead box Q1	NA	NA	NM_022858	NA	NA	NA	NA_x000D_
RAT21070	7.49787	P	6.45671	P	2.05788	2.05788	up	0	RAT21070	0	mRNA	Ptrh2	peptidyl-tRNA hydrolase 2	NA	NA	NM_001013860	NA	NA	NA	NA_x000D_
RAT25647	10.081	P	8.91036	P	2.25108	2.25108	up	0	RAT25647	0	mRNA	Sar1b	SAR1 homolog B (S. cerevisiae)	NA	NA	NM_001009622	NA	NA	NA	NA_x000D_
RAT27007	5.92047	P	3.34621	A	5.95564	5.95564	up	0	RAT27007	0	mRNA	Plvap	plasmalemma vesicle associated protein	NA	NA	NM_020086	NA	NA	NA	NA_x000D_
RAT01255	10.1669	P	8.42188	P	3.35201	3.35201	up	0	RAT01255	0	mRNA	Rcn2	"reticulocalbin 2, EF-hand calcium binding domain"	NA	NA	NM_017132	NA	NA	NA	NA_x000D_
RAT11590	11.8852	P	10.3358	P	2.92695	2.92695	up	0	RAT11590	0	mRNA	Cd164	"CD164 molecule, sialomucin"	NA	NA	NM_031812	NA	NA	NA	NA_x000D_
RAT12220	5.36402	P	2.53982	A	7.08222	7.08222	up	0	RAT12220	0	mRNA	Vsig8	V-set and immunoglobulin domain containing 8	NA	NA	NM_001105972	NA	NA	NA	NA_x000D_
RAT17922	6.74635	P	5.38452	P	2.57012	2.57012	up	0	RAT17922	0	mRNA	Ddx10	DEAD (Asp-Glu-Ala-Asp) box polypeptide 10	NA	NA	NM_001106820	NA	NA	NA	NA_x000D_
RAT10706	5.34389	P	2.76842	A	5.96068	5.96068	up	0	RAT10706	0	mRNA	En2	engrailed homeobox 2	NA	NA	NM_001109214	NA	NA	NA	NA_x000D_
RAT09115	9.62612	P	8.42111	P	2.30538	2.30538	up	0	RAT09115	0	mRNA	Slc7a1	"solute carrier family 7 (cationic amino acid transporter, y+ system), member 1"	NA	NA	NM_013111	NA	NA	NA	NA_x000D_
RAT21760	6.11691	P	4.90674	A	2.31364	2.31364	up	0	RAT21760	0	mRNA	Foxi2	forkhead box I2	NA	NA	ENSRNOT00000025569	NA	NA	NA	NA_x000D_
RAT26235	10.3841	P	8.88747	P	2.82187	2.82187	up	0	RAT26235	0	mRNA	Tmem27	transmembrane protein 27	NA	NA	NM_020976	NA	NA	NA	NA_x000D_
RAT09835	5.57314	P	2.58431	A	7.93832	7.93832	up	0	RAT09835	0	mRNA	Ate1	arginyltransferase 1	NA	NA	NM_001106300	NA	NA	NA	NA_x000D_
RAT13843	6.47091	P	5.06822	A	2.64394	2.64394	up	0	RAT13843	0	mRNA	Cyp11a1	"cytochrome P450, family 11, subfamily a, polypeptide 1"	NA	NA	NM_017286	NA	NA	NA	NA_x000D_
RAT28232	9.23122	P	8.2103	P	2.02922	2.02922	up	0	RAT28232	0	mRNA	Galntl4	UDP-N-acetyl-alpha-D-galactosamine:polypeptide N-acetylgalactosaminyltransferase-like 4	NA	NA	NM_001079884	NA	NA	NA	NA_x000D_
RAT19986	6.39139	P	5.1571	A	2.35266	2.35266	up	0	RAT19986	0	mRNA	Tanc2	"tetratricopeptide repeat, ankyrin repeat and coiled-coil containing 2"	NA	NA	NM_001191653	NA	NA	NA	NA_x000D_
RAT03495	6.79352	P	5.52671	P	2.4063	2.4063	up	0	RAT03495	0	mRNA	LOC100174910	glutaredoxin-like protein	NA	NA	NM_001131003	NA	NA	NA	NA_x000D_
RAT11148	5.78499	P	4.28146	A	2.83535	2.83535	up	0	RAT11148	0	mRNA	Tnfrsf14	"tumor necrosis factor receptor superfamily, member 14"	NA	NA	NM_001015034	NA	NA	NA	NA_x000D_
RAT10885	8.76459	P	7.50702	P	2.39092	2.39092	up	0	RAT10885	0	mRNA	Fam20b	"family with sequence similarity 20, member B"	NA	NA	NM_001107187	NA	NA	NA	NA_x000D_
RAT11715	6.30253	P	4.97369	A	2.51201	2.51201	up	0	RAT11715	0	mRNA	Mis18a	MIS18 kinetochore protein homolog A (S. pombe)	NA	NA	NM_001127523	NA	NA	NA	NA_x000D_
RAT17669	5.16493	P	3.65847	A	2.84112	2.84112	up	0	RAT17669	0	mRNA	RGD1565119	similar to Mitochondrial carrier triple repeat 1	NA	NA	XM_001078261	NA	NA	NA	NA_x000D_
RAT13079	5.53432	P	3.30955	A	4.67437	4.67437	up	0	RAT13079	0	mRNA	LOC679630	"similar to eukaryotic translation initiation factor 4, gamma 1 isoform a"	NA	NA	XM_002727916	NA	NA	NA	NA_x000D_
RAT08298	6.54956	P	4.78586	A	3.39567	3.39567	up	0	RAT08298	0	mRNA	Mrpl15	mitochondrial ribosomal protein L15	NA	NA	NM_001106633	NA	NA	NA	NA_x000D_
RAT17696	11.0089	P	9.18521	P	3.53977	3.53977	up	0	RAT17696	0	mRNA	Wfdc6a	WAP four-disulfide core domain 6A	NA	NA	NM_001246283	NA	NA	NA	NA_x000D_
RAT27477	12.6386	P	11.5399	P	2.14158	2.14158	up	0	RAT27477	0	mRNA	Cldn23	claudin 23	NA	NA	NM_001033062	NA	NA	NA	NA_x000D_
RAT18039	5.14876	P	4.04992	A	2.14182	2.14182	up	0	RAT18039	0	mRNA	Krtap13-2	keratin associated protein 13-2	NA	NA	NM_001109325	NA	NA	NA	NA_x000D_
RAT24038	6.4646	P	4.91517	A	2.92703	2.92703	up	0	RAT24038	0	mRNA	Mocos	molybdenum cofactor sulfurase	NA	NA	NM_001108425	NA	NA	NA	NA_x000D_
RAT02598	11.7474	P	10.2524	P	2.81872	2.81872	up	0	RAT02598	0	mRNA	Sult5a1	"sulfotransferase family 5A, member 1"	NA	NA	NM_001106194	NA	NA	NA	NA_x000D_
RAT01379	7.14926	P	6.11346	P	2.05025	2.05025	up	0	RAT01379	0	mRNA	Tec	tec protein tyrosine kinase	NA	NA	NM_053432	NA	NA	NA	NA_x000D_
RAT07458	9.56195	P	8.2466	P	2.48864	2.48864	up	0	RAT07458	0	mRNA	Tmem30b	transmembrane protein 30B	NA	NA	NM_001080380	NA	NA	NA	NA_x000D_
RAT00654	7.09213	P	6.09114	P	2.00137	2.00137	up	0	RAT00654	0	mRNA	Wdr43	WD repeat domain 43	NA	NA	NM_001037791	NA	NA	NA	NA_x000D_
RAT04961	6.87875	P	5.75959	P	2.17219	2.17219	up	0	RAT04961	0	mRNA	Gpr56	G protein-coupled receptor 56	NA	NA	NM_152242	NA	NA	NA	NA_x000D_
RAT25793	8.58989	P	7.41236	P	2.26188	2.26188	up	0	RAT25793	0	mRNA	LOC681367	hypothetical protein LOC681367	NA	NA	XM_001061427	NA	NA	NA	NA_x000D_
RAT12239	6.17061	P	4.76137	A	2.65597	2.65597	up	0	RAT12239	0	mRNA	LOC680370	hypothetical protein LOC680370	NA	NA	NM_001109402	NA	NA	NA	NA_x000D_
RAT06334	5.7755	P	4.74886	A	2.03727	2.03727	up	0	RAT06334	0	mRNA	Tmem70	transmembrane protein 70	NA	NA	NM_001109258	NA	NA	NA	NA_x000D_
RAT02977	7.14684	P	5.47918	P	3.17699	3.17699	up	0	RAT02977	0	mRNA	Efhd1	"EF-hand domain family, member D1"	NA	NA	NM_001109310	NA	NA	NA	NA_x000D_
RAT06275	6.71932	P	5.42666	P	2.44979	2.44979	up	0	RAT06275	0	mRNA	Gale	UDP-galactose-4-epimerase	NA	NA	NM_080783	NA	NA	NA	NA_x000D_
RAT25028	6.59113	P	2.57982	A	16.126	16.126	up	0	RAT25028	0	mRNA	B3galt6	"UDP-Gal:betaGal beta 1,3-galactosyltransferase, polypeptide 6"	NA	NA	NM_001106699	NA	NA	NA	NA_x000D_
RAT17592	7.16642	P	6.03799	P	2.1862	2.1862	up	0	RAT17592	0	mRNA	Pde9a	phosphodiesterase 9A	NA	NA	NM_138543	NA	NA	NA	NA_x000D_
RAT04305	6.93482	P	5.73204	P	2.30183	2.30183	up	0	RAT04305	0	mRNA	Hpdl	4-hydroxyphenylpyruvate dioxygenase-like	NA	NA	NM_001014068	NA	NA	NA	NA_x000D_
RAT05621	5.54653	P	4.37678	A	2.24973	2.24973	up	0	RAT05621	0	mRNA	Ggt1	gamma-glutamyltransferase 1	NA	NA	NM_053840	NA	NA	NA	NA_x000D_
RAT10614	7.07813	P	3.11939	A	15.5488	15.5488	up	0	RAT10614	0	mRNA	Mrpl35	mitochondrial ribosomal protein L35	NA	NA	NM_001106596	NA	NA	NA	NA_x000D_
RAT05122	8.76049	P	7.07947	P	3.20656	3.20656	up	0	RAT05122	0	mRNA	Hpd	4-hydroxyphenylpyruvate dioxygenase	NA	NA	NM_017233	NA	NA	NA	NA_x000D_
RAT17411	5.58509	P	2.58494	A	8.0008	8.0008	up	0	RAT17411	0	mRNA	Olr153	olfactory receptor 153	NA	NA	NM_001000167	NA	NA	NA	NA_x000D_
RAT09308	5.46238	P	3.76798	A	3.23642	3.23642	up	0	RAT09308	0	mRNA	Tspan6	tetraspanin 6	NA	NA	NM_001100672	NA	NA	NA	NA_x000D_
RAT04521	13.9979	P	11.88	P	4.34037	4.34037	up	0	RAT04521	0	mRNA	Serpina1f	"serine (or cysteine) peptidase inhibitor, clade A, member 1F"	NA	NA	NM_001108054	NA	NA	NA	NA_x000D_
RAT00800	9.52851	P	8.36426	P	2.24116	2.24116	up	0	RAT00800	0	mRNA	Smarca5	"SWI/SNF related, matrix associated, actin dependent regulator of chromatin, subfamily a, member 5"	NA	NA	NM_001107419	NA	NA	NA	NA_x000D_
RAT10428	7.85032	P	6.81427	P	2.05061	2.05061	up	0	RAT10428	0	mRNA	Foxn3	forkhead box N3	NA	NA	NM_001108047	NA	NA	NA	NA_x000D_
RAT00110	6.6542	P	5.53204	P	2.17671	2.17671	up	0	RAT00110	0	mRNA	Lsm2	"LSM2 homolog, U6 small nuclear RNA associated (S. cerevisiae)"	NA	NA	NM_001165922	NA	NA	NA	NA_x000D_
RAT09666	5.38129	P	4.1602	A	2.33122	2.33122	up	0	RAT09666	0	mRNA	RGD1564676	similar to NF-X1 type zinc finger containing protein (2J511)	NA	NA	XM_344589	NA	NA	NA	NA_x000D_
RAT02047	5.12688	P	2.40655	A	6.5902	6.5902	up	0	RAT02047	0	mRNA	Spink3	"serine peptidase inhibitor, Kazal type 3"	NA	NA	M35299	NA	NA	NA	NA_x000D_
RAT08465	5.94752	P	4.77548	A	2.2533	2.2533	up	0	RAT08465	0	mRNA	Homez	homeobox and leucine zipper encoding	NA	NA	NM_152849	NA	NA	NA	NA_x000D_
RAT01884	7.36607	P	6.33197	P	2.04783	2.04783	up	0	RAT01884	0	mRNA	Slc45a3	"solute carrier family 45, member 3"	NA	NA	NM_001135868	NA	NA	NA	NA_x000D_
RAT05349	8.07476	P	5.70387	P	5.1726	5.1726	up	0	RAT05349	0	mRNA	Lppr4	lipid phosphate phosphatase-related protein type 4	NA	NA	NM_001001508	NA	NA	NA	NA_x000D_
RAT02542	9.84864	P	7.96157	P	3.69883	3.69883	up	0	RAT02542	0	mRNA	Smpx	"small muscle protein, X-linked"	NA	NA	NM_053395	NA	NA	NA	NA_x000D_
RAT19120	6.22124	P	4.61879	A	3.03657	3.03657	up	0	RAT19120	0	mRNA	LOC502894	hypothetical protein LOC502894	NA	NA	NM_001025064	NA	NA	NA	NA_x000D_
RAT20285	6.36808	P	2.58294	A	13.7861	13.7861	up	0	RAT20285	0	mRNA	RGD1566036	similar to RIKEN cDNA 2310008H04	NA	NA	NM_001100988	NA	NA	NA	NA_x000D_
RAT09179	9.21192	P	7.73894	P	2.77595	2.77595	up	0	RAT09179	0	mRNA	Snrpd1	small nuclear ribonucleoprotein D1	NA	NA	NM_001106163	NA	NA	NA	NA_x000D_
RAT03946	7.40105	P	6.23713	P	2.24065	2.24065	up	0	RAT03946	0	mRNA	Lace1	lactation elevated 1	NA	NA	NM_001037656	NA	NA	NA	NA_x000D_
RAT22598	5.4625	P	4.38903	A	2.10449	2.10449	up	0	RAT22598	0	mRNA	Rgs11	regulator of G-protein signaling 11	NA	NA	NM_019338	NA	NA	NA	NA_x000D_
RAT25699	5.60384	P	4.43167	A	2.2535	2.2535	up	0	RAT25699	0	mRNA	Gpr34	G protein-coupled receptor 34	NA	NA	NM_001024925	NA	NA	NA	NA_x000D_
RAT08209	6.3291	P	4.59917	A	3.3171	3.3171	up	0	RAT08209	0	mRNA	Faslg	"Fas ligand (TNF superfamily, member 6)"	NA	NA	NM_012908	NA	NA	NA	NA_x000D_
RAT12117	12.5284	P	10.9193	P	3.05067	3.05067	up	0	RAT12117	0	mRNA	Gsta5	glutathione S-transferase Yc2 subunit	NA	NA	NM_001159739	NA	NA	NA	NA_x000D_
RAT25296	9.30732	P	8.19391	P	2.16355	2.16355	up	0	RAT25296	0	mRNA	Slc17a9	"solute carrier family 17, member 9"	NA	NA	NM_001108613	NA	NA	NA	NA_x000D_
RAT11257	5.25614	P	2.58859	A	6.35347	6.35347	up	0	RAT11257	0	mRNA	Nckap1l	NCK associated protein 1 like	NA	NA	NM_001108119	NA	NA	NA	NA_x000D_
RAT08533	7.02261	P	5.91367	P	2.15687	2.15687	up	0	RAT08533	0	mRNA	Traf6	Tnf receptor-associated factor 6	NA	NA	NM_001107754	NA	NA	NA	NA_x000D_
RAT08411	5.50351	P	4.50155	A	2.00271	2.00271	up	0	RAT08411	0	mRNA	Dhdh	dihydrodiol dehydrogenase (dimeric)	NA	NA	ENSRNOT00000028334	NA	NA	NA	NA_x000D_
RAT01491	9.66165	P	8.41434	P	2.374	2.374	up	0	RAT01491	0	mRNA	Lrrc8e	"leucine rich repeat containing 8 family, member E"	NA	NA	NM_001034139	NA	NA	NA	NA_x000D_
RAT07616	5.69351	P	4.53895	A	2.22617	2.22617	up	0	RAT07616	0	mRNA	Lphn2	latrophilin 2	NA	NA	NM_134408	NA	NA	NA	NA_x000D_
RAT03721	13.4377	P	12.0455	P	2.62472	2.62472	up	0	RAT03721	0	mRNA	Alas1	"aminolevulinate, delta-, synthase 1"	NA	NA	NM_024484	NA	NA	NA	NA_x000D_
RAT26681	7.93419	P	6.73256	P	2.29999	2.29999	up	0	RAT26681	0	mRNA	Erh	enhancer of rudimentary homolog (Drosophila)	NA	NA	NM_001109442	NA	NA	NA	NA_x000D_
RAT22832	7.03993	P	5.99967	P	2.05661	2.05661	up	0	RAT22832	0	mRNA	RGD1584021	similar to histone Hist2h3c1	NA	NA	XR_006811	NA	NA	NA	NA_x000D_
RAT10923	5.47432	P	2.50632	A	7.82449	7.82449	up	0	RAT10923	0	mRNA	Cdcp1	CUB domain containing protein 1	NA	NA	NM_001106869	NA	NA	NA	NA_x000D_
RAT30187	11.2836	P	10.161	P	2.1775	2.1775	up	0	RAT30187	0	mRNA	RGD1564906	similar to Glutathione S-transferase 8 (GST 8-8) (Chain 8) (GST class-alpha)	NA	NA	ENSRNOT00000000233	NA	NA	NA	NA_x000D_
RAT25922	5.32201	P	4.24113	A	2.11532	2.11532	up	0	RAT25922	0	mRNA	Elmod2	ELMO/CED-12 domain containing 2	NA	NA	NM_001109506	NA	NA	NA	NA_x000D_
RAT20534	9.36384	P	7.89215	P	2.77347	2.77347	up	0	RAT20534	0	mRNA	Hacl1	2-hydroxyacyl-CoA lyase 1	NA	NA	NM_053493	NA	NA	NA	NA_x000D_
RAT06840	5.79813	P	2.59662	A	9.19918	9.19918	up	0	RAT06840	0	mRNA	Chrna3	"cholinergic receptor, nicotinic, alpha 3"	NA	NA	NM_052805	NA	NA	NA	NA_x000D_
RAT10653	9.43598	P	7.93094	P	2.83832	2.83832	up	0	RAT10653	0	mRNA	Dcdc2	doublecortin domain containing 2	NA	NA	NM_001106110	NA	NA	NA	NA_x000D_
RAT07044	7.41779	P	6.38542	P	2.04538	2.04538	up	0	RAT07044	0	mRNA	Camkk1	"calcium/calmodulin-dependent protein kinase kinase 1, alpha"	NA	NA	NM_031662	NA	NA	NA	NA_x000D_
RAT26383	6.37237	P	3.88796	A	5.59605	5.59605	up	0	RAT26383	0	mRNA	Dand5	"DAN domain family, member 5"	NA	NA	ENSRNOT00000044133	NA	NA	NA	NA_x000D_
RAT12551	5.99236	P	4.62658	A	2.57716	2.57716	up	0	RAT12551	0	mRNA	Entpd7	ectonucleoside triphosphate diphosphohydrolase 7	NA	NA	NM_001107595	NA	NA	NA	NA_x000D_
RAT19865	5.83225	P	4.21784	A	3.06186	3.06186	up	0	RAT19865	0	mRNA	Six2	SIX homeobox 2	NA	NA	NM_001191908	NA	NA	NA	NA_x000D_
RAT18912	10.0032	P	8.48201	P	2.87024	2.87024	up	0	RAT18912	0	mRNA	Fam89a	"family with sequence similarity 89, member A"	NA	NA	NM_001011711	NA	NA	NA	NA_x000D_
RAT10693	5.63307	P	4.08135	A	2.93166	2.93166	up	0	RAT10693	0	mRNA	Zfyve16	"zinc finger, FYVE domain containing 16"	NA	NA	NM_001191958	NA	NA	NA	NA_x000D_
RAT11847	5.67274	P	3.95409	A	3.2913	3.2913	up	0	RAT11847	0	mRNA	RGD1565859	RGD1565859	NA	NA	XM_001063482	NA	NA	NA	NA_x000D_
RAT04274	6.49644	P	5.29141	P	2.30541	2.30541	up	0	RAT04274	0	mRNA	Tmem8a	transmembrane protein 8A	NA	NA	NM_001106991	NA	NA	NA	NA_x000D_
RAT02866	7.3794	P	6.11266	P	2.40617	2.40617	up	0	RAT02866	0	mRNA	Nudt5	nudix (nucleoside diphosphate linked moiety X)-type motif 5	NA	NA	NM_001007733	NA	NA	NA	NA_x000D_
RAT01975	7.76254	P	6.53261	P	2.34555	2.34555	up	0	RAT01975	0	mRNA	G0s2	G0/G1switch 2	NA	NA	NM_001009632	NA	NA	NA	NA_x000D_
RAT02113	5.14611	P	3.16393	A	3.95089	3.95089	up	0	RAT02113	0	mRNA	Ptn	pleiotrophin	NA	NA	NM_017066	NA	NA	NA	NA_x000D_
RAT06169	13.4577	P	12.2992	P	2.23225	2.23225	up	0	RAT06169	0	mRNA	Ndufa4	"NADH dehydrogenase (ubiquinone) 1 alpha subcomplex, 4"	NA	NA	NM_001127684	NA	NA	NA	NA_x000D_
RAT13557	5.52697	P	3.71486	A	3.51157	3.51157	up	0	RAT13557	0	mRNA	Xxylt1	xyloside xylosyltransferase 1	NA	NA	ENSRNOT00000002356	NA	NA	NA	NA_x000D_
RAT10043	7.41383	P	5.92348	P	2.80956	2.80956	up	0	RAT10043	0	mRNA	Golga7	golgin A7	NA	NA	NM_001007731	NA	NA	NA	NA_x000D_
RAT05843	12.0626	P	10.8773	P	2.27418	2.27418	up	0	RAT05843	0	mRNA	Fasn	fatty acid synthase	NA	NA	NM_017332	NA	NA	NA	NA_x000D_
RAT01002	7.92396	P	6.90194	P	2.03076	2.03076	up	0	RAT01002	0	mRNA	Fbxl4	F-box and leucine-rich repeat protein 4	NA	NA	NM_001107919	NA	NA	NA	NA_x000D_
RAT01852	9.55869	P	8.24171	P	2.49144	2.49144	up	0	RAT01852	0	mRNA	LOC100363987	mCG114897-like	NA	NA	XR_085743	NA	NA	NA	NA_x000D_
RAT11001	6.76862	P	5.11647	A	3.14302	3.14302	up	0	RAT11001	0	mRNA	Echdc1	enoyl CoA hydratase domain containing 1	NA	NA	NM_001007734	NA	NA	NA	NA_x000D_
RAT29645	5.6595	P	3.94589	A	3.27981	3.27981	up	0	RAT29645	0	mRNA	Olr95	olfactory receptor 95	NA	NA	NM_001001024	NA	NA	NA	NA_x000D_
RAT09435	5.68679	P	3.8738	A	3.51369	3.51369	up	0	RAT09435	0	mRNA	Rad1	RAD1 homolog (S. pombe)	NA	NA	NM_001106419	NA	NA	NA	NA_x000D_
RAT20258	15.7327	P	14.601	P	2.19112	2.19112	up	0	RAT20258	0	mRNA	Prom1	prominin 1	NA	NA	NM_021751	NA	NA	NA	NA_x000D_
RAT12160	14.5721	P	13.4	P	2.25339	2.25339	up	0	RAT12160	0	mRNA	Rnase12	"ribonuclease, RNase A family, 12 (non-active)"	NA	NA	NM_001012209	NA	NA	NA	NA_x000D_
RAT00420	7.60786	P	5.98928	P	3.07073	3.07073	up	0	RAT00420	0	mRNA	Rasl11b	RAS-like family 11 member B	NA	NA	NM_001002830	NA	NA	NA	NA_x000D_
RAT26656	5.47761	P	4.42008	A	2.08136	2.08136	up	0	RAT26656	0	mRNA	Zfp12	zinc finger protein 12	NA	NA	XM_001072483	NA	NA	NA	NA_x000D_
RAT01020	7.50965	P	5.97643	P	2.8943	2.8943	up	0	RAT01020	0	mRNA	Ints10	integrator complex subunit 10	NA	NA	NM_001134416	NA	NA	NA	NA_x000D_
RAT01103	10.941	P	9.48271	P	2.74785	2.74785	up	0	RAT01103	0	mRNA	Cad	"carbamoyl-phosphate synthetase 2, aspartate transcarbamylase, and dihydroorotase"	NA	NA	NM_001105710	NA	NA	NA	NA_x000D_
RAT14167	6.10157	P	4.99732	A	2.14986	2.14986	up	0	RAT14167	0	mRNA	Slc10a6	"solute carrier family 10 (sodium/bile acid cotransporter family), member 6"	NA	NA	NM_198049	NA	NA	NA	NA_x000D_
RAT00400	9.67964	P	8.59795	P	2.1165	2.1165	up	0	RAT00400	0	mRNA	Klhl14	kelch-like 14 (Drosophila)	NA	NA	NM_001108885	NA	NA	NA	NA_x000D_
RAT20401	12.266	P	11.1747	P	2.13054	2.13054	up	0	RAT20401	0	mRNA	Wfdc15b	WAP four-disulfide core domain 15B	NA	NA	NM_001009179	NA	NA	NA	NA_x000D_
RAT04287	5.25946	P	3.88119	A	2.59955	2.59955	up	0	RAT04287	0	mRNA	Ppargc1b	"peroxisome proliferator-activated receptor gamma, coactivator 1 beta"	NA	NA	NM_176075	NA	NA	NA	NA_x000D_
RAT11525	7.00522	P	5.61677	P	2.61798	2.61798	up	0	RAT11525	0	mRNA	Gpr116	G protein-coupled receptor 116	NA	NA	NM_139110	NA	NA	NA	NA_x000D_
RAT10431	6.93182	P	5.32686	P	3.04188	3.04188	up	0	RAT10431	0	mRNA	Bag4	BCL2-associated athanogene 4	NA	NA	NM_001025130	NA	NA	NA	NA_x000D_
RAT21640	6.6189	P	3.8999	A	6.58417	6.58417	up	0	RAT21640	0	mRNA	Krt33b	keratin 33B	NA	NA	NM_001008819	NA	NA	NA	NA_x000D_
RAT19470	5.19081	P	2.47086	A	6.58854	6.58854	up	0	RAT19470	0	mRNA	Batf3	"basic leucine zipper transcription factor, ATF-like 3"	NA	NA	NM_021865	NA	NA	NA	NA_x000D_
RAT03903	8.88003	P	7.673	P	2.30863	2.30863	up	0	RAT03903	0	mRNA	Hal	histidine ammonia lyase	NA	NA	NM_017159	NA	NA	NA	NA_x000D_
RAT07621	5.93043	P	4.72498	A	2.30609	2.30609	up	0	RAT07621	0	mRNA	Pnmal1	PNMA-like 1	NA	NA	NM_001108473	NA	NA	NA	NA_x000D_
RAT03046	9.39007	P	7.61474	P	3.42318	3.42318	up	0	RAT03046	0	mRNA	Nek4	NIMA (never in mitosis gene a)-related kinase 4	NA	NA	NM_001013134	NA	NA	NA	NA_x000D_
RAT07516	5.89299	P	4.71987	A	2.25499	2.25499	up	0	RAT07516	0	mRNA	RGD1311078	LOC360664	NA	NA	NM_001108307	NA	NA	NA	NA_x000D_
RAT13962	9.16199	P	8.06116	P	2.14478	2.14478	up	0	RAT13962	0	mRNA	Prkch	"protein kinase C, eta"	NA	NA	NM_031085	NA	NA	NA	NA_x000D_
RAT11313	5.20596	P	3.30739	A	3.72846	3.72846	up	0	RAT11313	0	mRNA	Mpped1	metallophosphoesterase domain containing 1	NA	NA	NM_001130569	NA	NA	NA	NA_x000D_
RAT07294	6.73872	P	5.54029	P	2.29489	2.29489	up	0	RAT07294	0	mRNA	RGD1311578	similar to PRO1853 homolog	NA	NA	NM_001008318	NA	NA	NA	NA_x000D_
RAT03842	9.05596	P	7.98535	P	2.10032	2.10032	up	0	RAT03842	0	mRNA	Akap11	A kinase (PRKA) anchor protein 11	NA	NA	NM_012773	NA	NA	NA	NA_x000D_
RAT02254	9.99697	P	8.99497	P	2.00277	2.00277	up	0	RAT02254	0	mRNA	Slc16a3	"solute carrier family 16, member 3 (monocarboxylic acid transporter 4)"	NA	NA	NM_030834	NA	NA	NA	NA_x000D_
RAT25605	10.6908	P	8.99376	P	3.24228	3.24228	up	0	RAT25605	0	mRNA	Mcpt9	mast cell protease 9	NA	NA	NM_019323	NA	NA	NA	NA_x000D_
RAT16048	9.28796	P	7.87988	P	2.65384	2.65384	up	0	RAT16048	0	mRNA	Gzmc	granzyme C	NA	NA	NM_134332	NA	NA	NA	NA_x000D_
RAT18317	8.2211	P	6.41731	P	3.49138	3.49138	up	0	RAT18317	0	mRNA	Aldoc	"aldolase C, fructose-bisphosphate"	NA	NA	NM_012497	NA	NA	NA	NA_x000D_
RAT15407	5.74595	P	4.6958	A	2.07076	2.07076	up	0	RAT15407	0	mRNA	Avpr2	arginine vasopressin receptor 2	NA	NA	NM_019136	NA	NA	NA	NA_x000D_
RAT18379	6.38483	P	5.27802	P	2.15369	2.15369	up	0	RAT18379	0	mRNA	RGD1565014	similar to Low-density lipoprotein receptor-related protein 4 precursor (LDLR dan)	NA	NA	XR_085647	NA	NA	NA	NA_x000D_
RAT16188	6.97028	P	5.00865	A	3.89501	3.89501	up	0	RAT16188	0	mRNA	Tspan11	tetraspanin 11	NA	NA	NM_001024262	NA	NA	NA	NA_x000D_
RAT07120	5.2649	P	4.24709	A	2.02485	2.02485	up	0	RAT07120	0	mRNA	LOC100360244	LRRGT00053-like	NA	NA	NM_001177863	NA	NA	NA	NA_x000D_
RAT09328	8.33696	P	6.14058	P	4.58328	4.58328	up	0	RAT09328	0	mRNA	Muc20	"mucin 20, cell surface associated"	NA	NA	NM_001107089	NA	NA	NA	NA_x000D_
RAT28819	10.4817	P	8.75128	P	3.31823	3.31823	up	0	RAT28819	0	mRNA	RGD1565970	similar to mast cell protease 8	NA	NA	XM_001058441	NA	NA	NA	NA_x000D_
RAT23734	5.56099	P	4.36582	A	2.28973	2.28973	up	0	RAT23734	0	mRNA	Col11a2	"collagen, type XI, alpha 2"	NA	NA	NM_212528	NA	NA	NA	NA_x000D_
RAT01610	7.83178	P	6.78704	P	2.06301	2.06301	up	0	RAT01610	0	mRNA	Plekhd1	"pleckstrin homology domain containing, family D (with coiled-coil domains) member 1"	NA	NA	NM_001127566	NA	NA	NA	NA_x000D_
RAT15628	6.60589	P	2.60787	A	15.978	15.978	up	0	RAT15628	0	mRNA	Hgd	"homogentisate 1, 2-dioxygenase"	NA	NA	NM_001012145	NA	NA	NA	NA_x000D_
RAT25111	5.59661	P	4.08505	A	2.85118	2.85118	up	0	RAT25111	0	mRNA	Pigb	"phosphatidylinositol glycan anchor biosynthesis, class B"	NA	NA	NM_001108166	NA	NA	NA	NA_x000D_
RAT05500	8.36138	P	7.19724	P	2.24099	2.24099	up	0	RAT05500	0	mRNA	Fbxo3	F-box protein 3	NA	NA	NM_001109606	NA	NA	NA	NA_x000D_
RAT08400	7.96976	P	6.9106	P	2.08372	2.08372	up	0	RAT08400	0	mRNA	Ehd4	EH-domain containing 4	NA	NA	NM_139324	NA	NA	NA	NA_x000D_
RAT10065	9.14777	P	7.61811	P	2.88717	2.88717	up	0	RAT10065	0	mRNA	Tcn2	transcobalamin 2	NA	NA	NM_022534	NA	NA	NA	NA_x000D_
RAT01753	10.3568	P	9.28323	P	2.10462	2.10462	up	0	RAT01753	0	mRNA	Sft2d1	SFT2 domain containing 1	NA	NA	NM_001008302	NA	NA	NA	NA_x000D_
RAT16320	9.8134	P	8.40417	P	2.65596	2.65596	up	0	RAT16320	0	mRNA	Rnase11	"ribonuclease, RNase A family, 11 (non-active)"	NA	NA	NM_001012476	NA	NA	NA	NA_x000D_
RAT21565	8.44406	P	6.80743	P	3.10938	3.10938	up	0	RAT21565	0	mRNA	Cycs	"cytochrome c, somatic"	NA	NA	NM_012839	NA	NA	NA	NA_x000D_
RAT02820	8.40924	P	7.17397	P	2.35424	2.35424	up	0	RAT02820	0	mRNA	Creld2	cysteine-rich with EGF-like domains 2	NA	NA	NM_001037208	NA	NA	NA	NA_x000D_
RAT29136	6.72984	P	5.72389	P	2.00826	2.00826	up	0	RAT29136	0	mRNA	Dpy19l4	dpy-19-like 4 (C. elegans)	NA	NA	ENSRNOT00000037869	NA	NA	NA	NA_x000D_
RAT18121	6.85864	P	5.01502	A	3.5891	3.5891	up	0	RAT18121	0	mRNA	Hes1	hairy and enhancer of split 1 (Drosophila)	NA	NA	NM_024360	NA	NA	NA	NA_x000D_
RAT28835	6.83885	P	5.79404	P	2.0631	2.0631	up	0	RAT28835	0	mRNA	Tpo	thyroid peroxidase	NA	NA	NM_019353	NA	NA	NA	NA_x000D_
RAT27338	7.41821	P	6.33962	P	2.11198	2.11198	up	0	RAT27338	0	mRNA	LOC688390	hypothetical protein LOC688390	NA	NA	NM_001109496	NA	NA	NA	NA_x000D_
RAT20869	5.30986	P	3.22026	A	4.2563	4.2563	up	0	RAT20869	0	mRNA	LOC691670	similar to natural killer cell protease 7	NA	NA	NM_001109646	NA	NA	NA	NA_x000D_
RAT16051	5.19864	P	3.77318	A	2.686	2.686	up	0	RAT16051	0	mRNA	Rnf6	ring finger protein (C3H2C3 type) 6	NA	NA	NM_001107118	NA	NA	NA	NA_x000D_
RAT00848	7.08953	P	5.36116	P	3.31353	3.31353	up	0	RAT00848	0	mRNA	Sox18	SRY (sex determining region Y)-box 18	NA	NA	NM_001024781	NA	NA	NA	NA_x000D_
RAT14067	7.51516	P	6.18232	P	2.51899	2.51899	up	0	RAT14067	0	mRNA	Rev3l	"REV3-like, catalytic subunit of DNA polymerase zeta (yeast)"	NA	NA	NM_001083966	NA	NA	NA	NA_x000D_
[truncated: 523 more rows]

## Sheet: Down
ProbeName	Gaozhi_NS	Gaozhi_flags	ZhengC_NS	ZhengC_flags	foldchange	foldchange(abs)	Regulation	ControlType	ProbeName.1	ControlType.1	Classify	GeneSymbol	Description	Seq_id	Target_id	Target_id_1	Target_chr	Target_strand	Target_start	Target_end_x000D_
[truncated: 1,678 more rows]

[truncated: 1 more sheets: Up_VS_Down_Table]
